# Supplementary material for: Avoidance of hydrogen sulfide is modulated by external and internal states in C. elegans
Source: bioRxiv preprint, doi:10.1101/2023.10.09.561535, version 3 (2025-09-22)
Supplement: Supplementary file 2 [file 561535_file03.xlsx]

## Sheet: 50ppm 1h vs Con 1h
	log2FoldChange	pvalue	padj
sqrd-1	3.04522217344621	1.20286179765413e-97	2.45901037294435e-93
nit-1	3.26501305254724	2.26884103498643e-87	2.31909586391138e-83
gst-19	6.5631692533281	4.79781261601816e-75	3.26938944364198e-71
cysl-2	2.78429730331712	4.21058864353131e-68	2.15192659099276e-64
skr-3	1.28338396090965	1.93045859091593e-63	7.89287299481889e-60
clec-4	3.0689942229755	9.72317469085384e-57	3.31284767008542e-53
semo-1	2.31781566411396	2.99818483212678e-51	8.75598464616681e-48
pals-24	2.14079864254082	5.28340698284361e-51	1.3501086118784e-47
clec-66	2.02807741600069	8.4432277787343e-49	1.9178322831185e-45
B0228.7	1.03512939862749	3.34728536722693e-46	6.84285547622201e-43
acs-14	-1.21458071257859	1.53822333284963e-45	2.85871814485863e-42
pals-23	1.77830552280901	3.27993855230837e-45	5.58764865206999e-42
hsp-70	4.54717214373124	2.79027558806078e-43	4.38781568051742e-40
Y82E9BR.17	-2.46853952757068	1.88565255382772e-42	2.75345679699286e-39
zip-8	-2.42636869289132	4.27980787722874e-42	5.83280749561247e-39
R08E5.3	2.26905109309807	5.99842409550778e-42	7.66411148652909e-39
K08D8.5	1.50798642130481	3.43433238979591e-40	4.12988570850575e-37
T23C6.4	-1.12908924295524	5.40303713606485e-40	6.13634934292076e-37
T05D4.2	-1.57784667968148	1.92589577308887e-39	2.0721624889082e-36
Y48E1B.8	-3.20123413251753	2.38562978031095e-39	2.43847147994484e-36
clec-196	-2.15852669123256	3.79568427190549e-38	3.69500826526495e-35
ftn-1	-2.84222783937859	4.29822246709937e-38	3.99402554067783e-35
Y71F9AM.9	3.61707050138727	5.09031136223569e-38	4.52440152948627e-35
ZK896.5	1.7365554864831	6.25863598896634e-38	5.33105398010162e-35
taap-1	0.691653795154033	2.61727631086372e-37	2.14019918491948e-34
F49C12.7	-1.42006341434584	5.36939967897199e-37	4.22179375527786e-34
R04A9.7	-1.64652829963705	1.63441435439884e-36	1.23749380173983e-33
F44F1.6	-1.61039536143088	2.11836765987862e-36	1.54663535967495e-33
clec-265	1.54990854864452	3.54309870919722e-36	2.49764023834892e-33
nspe-6	9.46044941592692	7.61584067487499e-36	5.18968769721565e-33
mpst-3	1.83855430964652	1.8436216720332e-35	1.21577928520563e-32
dhs-20	-1.33855341463827	2.42285808125591e-35	1.54782774234733e-32
cdo-1	2.00580562528574	3.08507305959221e-35	1.91115601688617e-32
M162.5	1.7656146839203	4.68997036150955e-35	2.81991365000999e-32
W05E10.1	1.56361790800198	5.53358650476501e-35	3.23208882619746e-32
dod-22	2.82621870048296	7.20346040829289e-35	4.0905650312981e-32
mnp-1	-1.82165901398273	1.48845482376526e-34	8.22391404384683e-32
zeel-1	-1.90551239848385	4.07700606987909e-34	2.19332197596153e-31
his-24	-2.06907884864358	5.61039034263332e-34	2.94085153267828e-31
F56D5.3	2.56742132697137	5.80567887276001e-34	2.96713732989582e-31
K05C4.9	-1.75959731330763	5.98368387876055e-34	2.9835231593537e-31
cav-1	-1.61418550358064	8.46007046157606e-34	4.1178385820476e-31
K11H12.4	2.80239930539439	1.88896758181951e-33	8.98050331979912e-31
hpd-1	-0.918350191044251	7.4374628148961e-33	3.4555466437482e-30
pbo-4	0.791576267958313	1.90416562117281e-32	8.65041284303018e-30
lys-2	1.54643226173107	4.44504876946118e-32	1.97543765204554e-29
M05D6.5	0.859837034450585	4.9348039390712e-32	2.14642972183899e-29
nhr-25	-2.23342911813249	6.4109627187151e-32	2.7304023095561e-29
T24B8.3	-1.5359556582725	9.76946396470671e-32	4.06316240443248e-29
clec-266	-2.04482622447258	9.93778409341213e-32	4.06316240443248e-29
jmjd-3.2	-2.10274552818947	2.02934527274433e-31	8.13449125700243e-29
F10A3.17	1.40995672878484	2.1419755200348e-31	8.42084722232142e-29
F26H9.5	0.771763211275778	1.03550571819031e-30	3.99412139565368e-28
F13C5.2	-1.00483712563084	1.76509175372564e-30	6.68217976322467e-28
nhr-156	1.91036727477429	2.86444495648627e-30	1.06468814991725e-27
cec-8	-1.4861932070925	4.75576550373988e-30	1.73610918201704e-27
oac-6	2.30249647586988	5.53224183139121e-30	1.98413367998474e-27
lec-10	1.16486462355186	6.5531032284603e-30	2.30974291895541e-27
fbxa-60	1.88480686107281	6.74723807256003e-30	2.33786081215839e-27
T09B4.5	-1.5780950978743	6.90649643438191e-30	2.35315844346782e-27
zip-7	-2.33383612273371	9.23163487105114e-30	3.09380838801473e-27
arrd-1	-1.71901720078799	2.01441863507216e-29	6.64205808980325e-27
ttr-50	-1.32796793463042	2.57811552461916e-29	8.36578026504596e-27
Y45G5AM.5	-1.56760553644077	7.22815333177263e-29	2.30883029002231e-26
C34H4.2	1.74074745253339	2.35681246306914e-28	7.41235648961883e-26
eya-1	-1.52740057915414	2.85387279167939e-28	8.8396547697427e-26
C33G3.4	-1.13501054820417	3.23477406277558e-28	9.86992330825689e-26
oac-53	1.93296808486396	3.82080260386353e-28	1.14865687692327e-25
unc-39	-2.41053278426864	4.3935255929897e-28	1.30169338692012e-25
mls-2	-2.05706018988786	4.55863880629846e-28	1.33131790167371e-25
C40A11.2	-1.99314348322574	5.2994070472729e-28	1.52585603193521e-25
hacd-1	1.26415457208318	1.17005267855616e-27	3.32213707051717e-25
C29F3.7	0.962914941222919	2.44688525978711e-27	6.85228429668876e-25
C04A11.5	3.15170851043536	4.85647526833616e-27	1.34163410689995e-24
C08F1.10	-2.44380633783864	8.43135008553457e-27	2.29816119731444e-24
fbxb-75	-1.84144456547949	9.59262558428698e-27	2.57290623867633e-24
ceh-36	-2.21100729927149	9.69103264579941e-27	2.57290623867633e-24
F48E3.6	-1.87187648074095	1.30336791956416e-26	3.41599363841669e-24
hgo-1	-0.644137063157626	2.16622705485297e-26	5.60559236485561e-24
F33E2.5	-1.32404739496766	2.25468102841295e-26	5.76155553298074e-24
fbxc-51	-2.04557099924094	2.79309208742107e-26	7.0492816719937e-24
igcm-4	-1.23029823102677	3.5069698525691e-26	8.7430469141549e-24
dgn-1	-0.791867177235554	3.73595397274164e-26	9.20169964635631e-24
R09H10.7	2.77821206114978	5.27059517102926e-26	1.28269972715894e-23
F46F2.3	-1.75213102417993	5.92000239707933e-26	1.42379540004109e-23
dsl-3	-2.33552714695796	7.10787005920136e-26	1.68960683279364e-23
Y94H6A.10	1.41181689512888	7.24124056435559e-26	1.70152506732323e-23
cht-1	-1.59401955742471	1.13281294433805e-25	2.6316017069435e-23
pax-3	-2.02845483882883	1.32164629042604e-25	3.03577697923365e-23
T19D12.4	1.59145419238257	2.34015807277586e-25	5.31553905352855e-23
K08D8.3	1.20011445522881	4.58952200845283e-25	1.03102855405276e-22
asns-2	2.23382469531525	5.6293499198655e-25	1.25087826534576e-22
C25D7.5	2.66878099174645	5.93398903090796e-25	1.30439287912743e-22
efl-3	-1.51617389326174	6.26024310120352e-25	1.36146967785004e-22
C17H12.8	1.31696635717967	8.06470030273092e-25	1.73543861356556e-22
ham-1	-1.77424093921037	1.04772752249292e-24	2.23111393149195e-22
cyp-35A5	-1.79346354378682	1.34476114643087e-24	2.8341187748955e-22
hil-3	-1.55334636884939	2.01727930257704e-24	4.20808579414107e-22
F46E10.2	-1.90271037305348	2.49533540566999e-24	5.15274158566784e-22
fbxc-24	-2.28372635736622	3.02338359293727e-24	6.18070307904166e-22
T24C4.2	-0.921529170616601	4.90152945933591e-24	9.89144691105147e-22
amx-3	-1.07814290483964	4.93532057392384e-24	9.89144691105147e-22
pgp-6	4.18617114559442	5.23136340790934e-24	1.03829866163001e-21
K02B12.2	-1.23707235299011	6.91850704053386e-24	1.35995230220802e-21
gst-30	1.7082153321369	1.07573293772699e-23	2.09440080437647e-21
Y37H2A.14	2.14080906946446	1.15660386641015e-23	2.23060875858705e-21
atz-1	-1.38005391176776	1.39233888098792e-23	2.66014801346131e-21
Y82E9BR.1	-1.38740139546977	2.75261311345133e-23	5.21033980354496e-21
C03D6.9	-1.78042876335599	3.24682917996401e-23	6.08944302073433e-21
cyp-25A1	-1.71465584866464	3.63633495323608e-23	6.75796322263683e-21
fbxb-66	-1.99924444265167	5.08306496033146e-23	9.36154026883388e-21
T24C12.3	-0.759266022860388	6.34011299513467e-23	1.1572404460673e-20
K02E7.6	-1.72077235882319	6.86510122160744e-23	1.24197579002939e-20
oac-20	1.52555667203003	8.1309556164435e-23	1.45808004971013e-20
fbxb-37	-1.45708869483943	1.08693378589383e-22	1.9321902073937e-20
C24H12.1	-2.03248858438554	1.10988490415317e-22	1.95598078410373e-20
jmjc-1	-1.00275808062438	1.1385469062281e-22	1.9893431114548e-20
C06B8.2	2.06035785374637	1.26370922608818e-22	2.17183382241978e-20
elt-1	-0.949857167195042	1.26901512235713e-22	2.17183382241978e-20
F07H5.13	-1.79568366833258	1.27486209798157e-22	2.17183382241978e-20
hsp-16.2	4.42902536363357	1.56834017622691e-22	2.64971720847989e-20
cyp-33C8	1.70357491549167	1.80737641061848e-22	3.02854065264538e-20
dpyd-1	-1.00801139782536	1.82259999331666e-22	3.02922046043678e-20
ugt-26	2.48350117896353	1.93444829610605e-22	3.18918762236257e-20
C08F1.6	-1.49887013034445	2.19157943576243e-22	3.5841966724233e-20
pnk-1	0.584491786084236	2.5429047053819e-22	4.12576197556526e-20
C34H4.1	2.16633400329955	2.58319265567954e-22	4.15812657165801e-20
Y65A5A.1	-1.6072901311732	2.69409160484314e-22	4.30275895920377e-20
ugt-14	2.67906931437535	2.74938732936136e-22	4.35703295923522e-20
acox-1.2	-1.28795453611995	3.00268980938033e-22	4.72184521332016e-20
cutl-25	-1.96120665142343	3.19970159520245e-22	4.993244252727e-20
ced-11	-1.3367211584843	4.11992478174592e-22	6.38057744797212e-20
K08D8.6	0.776511917588553	4.88070689792763e-22	7.50197677551387e-20
sup-26	-0.864400132087796	5.07255405355188e-22	7.73867332214635e-20
cpg-24	-3.21336276145346	6.11283664889461e-22	9.25664589728537e-20
F40G9.6	-1.93953305564378	6.6442763928438e-22	9.98742222786072e-20
epg-2	-1.39626531382002	7.9378695817262e-22	1.18448078729364e-19
Y71A12B.11	-1.26169895954426	1.09458726387779e-21	1.62149619097491e-19
C05B5.4	-1.49831393558195	1.13057694709234e-21	1.66276147693588e-19
tbx-43	-1.82783601159152	1.17431458894598e-21	1.71475093870161e-19
Y71F9AL.7	-1.71719430138667	1.24274921212849e-21	1.80181008110232e-19
F17H10.1	0.621275459035817	1.33031999587631e-21	1.90285348316525e-19
tag-244	1.0485528735028	1.33105732080727e-21	1.90285348316525e-19
Y45G5AM.3	0.947545150492955	1.778941193128e-21	2.51334949339558e-19
F55G11.8	0.948939833126647	1.78269176022286e-21	2.51334949339558e-19
clec-7	1.04217882670323	2.09174212088151e-21	2.92886877925895e-19
Y46G5A.7	-1.38778245508573	2.16811416545057e-21	3.01515359757183e-19
ugt-31	2.07187283291775	2.48750682722416e-21	3.43595284249618e-19
fbxb-93	-1.41430879556794	4.39973352688526e-21	6.01880259589473e-19
ZK1053.4	-1.20798031461335	4.4162813157766e-21	6.01880259589473e-19
C35E7.5	-1.23537525434722	4.9588076537668e-21	6.71343740834138e-19
C52D10.3	-2.34290810718613	5.39798959958092e-21	7.25994088054163e-19
F28H7.3	-1.05394466816776	6.26011348217692e-21	8.36441175922502e-19
fbxb-104	-1.38542696024426	6.65726644150613e-21	8.83730505608505e-19
ugt-65	-2.06669965500353	7.13089967792697e-21	9.40496658812006e-19
F53G2.1	-2.16451352740142	7.84533935565032e-21	1.02809149004846e-18
vab-15	-1.74202395525981	8.207228243502e-21	1.06866475784657e-18
dod-17	1.98182910354421	8.97279401723094e-21	1.16095460819147e-18
F22B5.4	2.01404675835984	9.39876833303001e-21	1.20842151592536e-18
hlh-14	-1.83661023896922	9.57871123158627e-21	1.22385996067074e-18
fbxb-108	-1.50789365638346	1.02776037402356e-20	1.30500033081762e-18
C39B5.2	-1.15617343372278	1.04580054521737e-20	1.31970991023942e-18
bath-10	-1.70862897797979	1.22645656702189e-20	1.53818721470114e-18
igdb-3	-2.8119500656088	1.30923091623299e-20	1.63146644674435e-18
Y105C5A.24	0.938976249811893	1.31679285678627e-20	1.63146644674435e-18
fbxb-63	-1.38087684312453	1.41928737211757e-20	1.74786094868672e-18
F17A9.4	0.744581836527836	1.96539895225765e-20	2.4059072323954e-18
C46C11.4	-1.73549794168002	2.18512272892383e-20	2.65895618734463e-18
hmg-11	-1.30247331353015	2.37403131604979e-20	2.87173504106543e-18
fbxb-41	-1.3424283162917	2.6053941615184e-20	3.13306310846591e-18
sdz-5	-1.54583881952698	3.80316754773364e-20	4.54667568294262e-18
fbxb-88	-1.8535610789708	4.07313753959618e-20	4.84111341406772e-18
sym-1	-2.62167896107923	4.61376287867882e-20	5.45197425022146e-18
fbxb-40	-1.62409332488247	5.46026385418368e-20	6.41518241213086e-18
cln-3.3	-1.43435798864786	5.66179270054763e-20	6.61394446727402e-18
R07E4.1	-0.991278297986007	6.54029744044886e-20	7.59677844176682e-18
C40A11.4	-1.97318638088773	6.67032052674687e-20	7.70403178125911e-18
twk-34	1.08151754844315	6.74682413375425e-20	7.74861380709765e-18
Y17G7B.8	0.88744153625524	6.99870758436126e-20	7.99299324844119e-18
F32A5.4	1.15261546224344	7.19911927152879e-20	8.1761997371035e-18
C06E1.1	-0.921519869021444	7.80062766560305e-20	8.81039952308967e-18
Y38E10A.9	6.22679975444462	7.93432962031917e-20	8.91217035319697e-18
tag-120	0.984192397846202	9.79292085975488e-20	1.09397093516923e-17
ugt-22	-0.907908898834312	1.04285294330504e-19	1.15864362608614e-17
fbxa-31	1.30673402374094	1.14146859224816e-19	1.26135364493671e-17
ztf-11	-1.04773281175002	1.36145507189189e-19	1.49628376952931e-17
alh-13	-0.766421473391137	1.36870843272504e-19	1.49628376952931e-17
inx-2	-0.886553556891366	1.43633758896519e-19	1.56186432612848e-17
cfz-2	-1.48888504676955	2.27502904465962e-19	2.46076289735326e-17
K12C11.6	1.07810859505875	2.4755065568868e-19	2.66351476539142e-17
fbxc-25	-1.61977837169393	3.12169106658577e-19	3.34119007718392e-17
D1005.2	-1.34722513957375	3.83610666194003e-19	4.08445460885625e-17
hpo-6	0.934689795358559	4.48992501201189e-19	4.73993890631301e-17
B0416.5	-0.373181491414969	4.49810765457479e-19	4.73993890631301e-17
fbn-1	-2.53006143375295	5.06971972745242e-19	5.31488617375948e-17
Y17G9B.2	-2.68215359196058	5.42181067057955e-19	5.65500385401315e-17
cest-25	0.752471161670663	5.61637655672334e-19	5.82820233244138e-17
fbxa-59	1.16870995505741	5.64786541468346e-19	5.83127841779666e-17
ceh-43	-1.31266221128024	6.31547715471415e-19	6.48780399365936e-17
cyd-1	-0.824820533027374	7.52412383210835e-19	7.69078317498955e-17
sdz-28	-1.19478521563788	8.31806104860058e-19	8.4600060704747e-17
Y39G10AL.1	-1.04191403784988	8.86567569346193e-19	8.97232713868526e-17
fbxb-105	-1.22715624240619	9.61516012454979e-19	9.68289253330894e-17
F36H5.4	-1.62879370821391	1.19755075066023e-18	1.20007499979152e-16
cyn-6	-0.935784995531101	1.27788201214118e-18	1.27432887679035e-16
W05H9.1	1.06366362023675	1.3795895237627e-18	1.3690751764214e-16
EEED8.15	-1.00550758318537	1.38775440618063e-18	1.37052479833578e-16
F58F12.12	1.96204661167686	1.53952367792362e-18	1.51310012249002e-16
B0507.3	-2.05403206695598	1.83808041357293e-18	1.79788889448188e-16
prmt-6	-0.985734241444271	1.91125898793808e-18	1.86056511859135e-16
R08E5.1	1.36925475930722	2.03140223658233e-18	1.96814956978449e-16
K11H12.3	2.20855129477376	2.10782242434533e-18	2.03255725570243e-16
hsp-16.41	4.06842382069756	2.16909911658159e-18	2.08182597372194e-16
lin-32	-2.30588955264008	2.23627852511403e-18	2.13627298546291e-16
C47D12.4	-1.42864430504695	2.34221559533313e-18	2.22706574025094e-16
E03H4.8	2.30703111501972	2.61319563907367e-18	2.47322029859181e-16
fbxb-10	-1.6401217095518	2.7364407512024e-18	2.57792895284933e-16
Y41D4A.3	-1.25231342038246	2.91867152576615e-18	2.73699091748795e-16
F27D9.2	0.905044172818384	3.01241553083841e-18	2.81200048844427e-16
ceh-27	-1.71555918557748	3.0956522507267e-18	2.87656449825481e-16
B0462.4	3.01404515987132	3.89776757255733e-18	3.60552318940224e-16
fkh-2	-1.88531187922298	4.17407092215182e-18	3.84371765142116e-16
igcm-3	-1.08940145948569	4.28262567632609e-18	3.92599626462485e-16
acsd-1	-1.05968296209655	4.3298449724698e-18	3.95156342733036e-16
Y116F11A.4	-1.71808255265864	4.56415074514811e-18	4.14688594146946e-16
F44A2.3	1.15110231053506	4.61420303490819e-18	4.1738120638331e-16
W04A8.5	-1.04245117921374	4.72751391714439e-18	4.25746991225475e-16
zipt-2.3	-1.86464190213132	5.64304980387607e-18	5.05968715529116e-16
F33H2.3	-0.454354900534121	6.14964345203575e-18	5.48983236200728e-16
Y7A9D.1	-1.57816681604258	6.59479746025167e-18	5.8616280208663e-16
lbp-1	-0.798769409554259	7.1596231799345e-18	6.33611154404334e-16
fbxb-26	-1.38523452613824	7.78700799090614e-18	6.86162949819371e-16
Y54G2A.49	2.49537116821664	7.85852466294267e-18	6.89492788345652e-16
fbxa-79	1.49900001963943	8.18619963021419e-18	7.1517298735243e-16
C04C11.25	3.05168399975892	8.38721307535258e-18	7.29616157018863e-16
btb-11	-1.19430100734664	8.44379222738143e-18	7.31425612306605e-16
hlh-1	-1.31854257114002	9.38487294712971e-18	8.0951458927499e-16
arrd-4	-1.35056704502362	9.96307161223581e-18	8.55777617516541e-16
cpt-5	-1.04748901813148	1.18720653018896e-17	1.01548381157543e-15
col-99	-1.44858558598294	1.21913204366557e-17	1.03844651536064e-15
C32F10.4	0.812288720524962	1.22966881635474e-17	1.04307550260332e-15
Y77E11A.23	-1.32324225762846	1.45125456588732e-17	1.22595029299316e-15
pcp-2	-1.27198772114508	1.58576740849864e-17	1.33406761859826e-15
cyp-35D1	-1.4563127652946	1.65908965739779e-17	1.39003155189275e-15
Y43B11AL.1	-1.21128157273966	1.71520273782464e-17	1.43117916609588e-15
swt-6	1.35928784165102	1.82288344504748e-17	1.51484578321568e-15
T26C12.3	-1.80088315866231	1.88232829223959e-17	1.55791244041514e-15
T05E12.6	0.761577823454539	1.89316609407162e-17	1.56056429278654e-15
R11G1.7	-1.05072836943788	1.99795552314622e-17	1.64032950842081e-15
ngn-1	-1.64796125609049	2.02861940061145e-17	1.658842656268e-15
cnd-1	-1.77888435254862	2.33665900400689e-17	1.9031203194786e-15
R12C12.9	-0.895770767938916	2.47886547794984e-17	2.01093043514796e-15
F13H8.3	-0.960632969663237	2.66757870844239e-17	2.15546685915762e-15
fbxb-65	-1.6714804686766	2.91620762498757e-17	2.34708789281972e-15
C07D10.5	-1.06540037638122	3.01584807077e-17	2.41776400434318e-15
T25E12.6	-0.882487298189729	3.11452216752313e-17	2.48711627619826e-15
aagr-4	-0.716459788058509	3.14157051354496e-17	2.49895431939298e-15
sdz-4	-1.43246363274249	3.4128454340109e-17	2.70421702354592e-15
Y27F2A.8	-1.06580069527275	3.46276830685933e-17	2.73318040529442e-15
cbp-3	1.17345129838448	3.89938979470499e-17	3.06597021435208e-15
C34C12.4	0.529764341482023	4.0681733413739e-17	3.18642404665542e-15
F35E12.4	3.4534455304701	4.12041385493309e-17	3.21502368077851e-15
F46C5.1	2.85173656996081	4.55920630146655e-17	3.54387279166846e-15
T11B7.1	-1.11502209208891	4.7376356542273e-17	3.66861688179427e-15
C49G7.12	2.50318118941992	4.76027036718624e-17	3.67223423080711e-15
F56D2.5	1.87283127827128	5.26407422028849e-17	4.04561914606608e-15
C09F9.2	-2.67035374456484	5.3208062463136e-17	4.07390419825427e-15
inx-3	-0.688890249191853	5.47446822202107e-17	4.17591618890958e-15
mig-15	-0.338563179064673	5.71674759680551e-17	4.34451565507416e-15
nhr-67	-1.5240559354065	6.16210885849027e-17	4.6656293108932e-15
cbp-2	0.994845708179994	6.25776703938738e-17	4.72057312126186e-15
C05D9.7	-0.750730019181141	6.32580337149464e-17	4.75435287953915e-15
cnc-2	-1.58543390864801	6.58765118582072e-17	4.93184400116873e-15
C18H9.6	0.809465352783784	6.61021012728186e-17	4.93184400116873e-15
parg-2	3.43213444269782	7.07710767647621e-17	5.26099317200739e-15
Y71F9AL.6	-1.30622184743922	7.8082647030706e-17	5.78349113495914e-15
fbxb-84	-1.08093021383467	8.57667269956287e-17	6.3297083031467e-15
dmd-5	-2.31886467354405	8.81602251650101e-17	6.459857492901e-15
K09E9.1	0.683020808016662	8.81622188778252e-17	6.459857492901e-15
catp-3	2.4719840088115	9.4669192543188e-17	6.91186536842997e-15
skr-21	-1.32385669022242	9.50546842508766e-17	6.91531284747569e-15
fbxc-40	-1.35716865631754	9.90748701332045e-17	7.1822254260039e-15
fbxa-74	1.38572816421931	1.12172443338672e-16	8.10297264725258e-15
R03G8.3	1.26219207413939	1.17530154675609e-16	8.46010194377981e-15
fbxb-77	-2.04415564058044	1.18083462249921e-16	8.47010603078994e-15
F29C6.1	1.37006046274046	1.2233827577011e-16	8.74462018030892e-15
F32H2.6	-2.33632302402532	1.26780932418986e-16	9.03060139875026e-15
C18E9.9	0.799395011008622	1.27765303661569e-16	9.06911841233836e-15
ztf-6	-0.742204250229351	1.2833668480757e-16	9.07815518173409e-15
acer-1	0.430794753027461	1.35507694998015e-16	9.55235796153248e-15
clec-83	0.805315754121097	1.39725147211668e-16	9.81581163040596e-15
fbxc-29	-1.28364938493202	1.62263200512445e-16	1.13600911235477e-14
cest-6	-0.898487644729736	1.69692326874769e-16	1.18396595163853e-14
ugt-29	1.39076109588161	2.00143589339905e-16	1.3916787064203e-14
F53B3.5	-1.21222903854737	2.30513113671597e-16	1.5974168077249e-14
sqst-1	1.02642580727696	2.53395289655104e-16	1.75005402243895e-14
D2045.8	1.06006757021064	2.89209067698185e-16	1.99067372759394e-14
fozi-1	1.23175374898995	3.18679990852702e-16	2.18616612516838e-14
fbxb-74	-1.35018992229105	3.2227842428512e-16	2.20345746744505e-14
ugt-2	1.0259503156153	3.30372901079376e-16	2.25127107225523e-14
fbxb-91	-1.17828046736134	3.43279419820053e-16	2.33144889680443e-14
pgp-5	2.94836531734063	3.56113786607963e-16	2.41060733100218e-14
fbxa-128	1.67949549332065	3.65786217804773e-16	2.46791011570395e-14
ppt-1	-1.02988005590182	3.85984572771969e-16	2.59561928328203e-14
ced-8	-0.633901626680271	3.95844543524246e-16	2.65319672238235e-14
fbxa-103	-2.17769550867622	4.08795105341525e-16	2.73104520865908e-14
die-1	-0.493087614473706	4.41743326208397e-16	2.94155010347826e-14
fkb-7	-1.21374243728642	4.59620909311729e-16	3.05065917177262e-14
tbx-8	-1.56748973258579	5.58591824279644e-16	3.69556396885073e-14
F22E5.20	-1.19183848084913	5.69360497509255e-16	3.75465698405861e-14
tbx-7	-2.24257151100738	6.10276681582974e-16	4.0115389715758e-14
F35E2.2	-2.30220874261421	7.24236983794481e-16	4.74537713452262e-14
hil-2	-0.857190450284927	7.54874870400213e-16	4.93032171744139e-14
Y54G11A.7	-0.781883886313513	7.9530723139589e-16	5.17785532847967e-14
C30G12.2	1.4382373646175	8.01610236379837e-16	5.20232319438508e-14
F23D12.11	-1.05394879210036	9.30649728093587e-16	6.02065582006874e-14
sdn-1	-0.514192836715088	9.73208595675468e-16	6.27612092157526e-14
glb-1	0.902804936941556	9.86598936818024e-16	6.34246605829272e-14
R10E8.8	1.20945308207906	9.976410027317e-16	6.39334640089159e-14
T23G11.1	2.59869510446075	1.07354655757539e-15	6.85828508641053e-14
F55C9.5	-1.88610788340621	1.11569873063799e-15	7.10536733658334e-14
lec-12	0.51038143457707	1.23524930140682e-15	7.84229859275141e-14
ceh-32	-1.04364757799028	1.31417539980752e-15	8.31755037097989e-14
ZK1240.2	0.630936964347503	1.40563856439591e-15	8.86897196664988e-14
cest-8	1.33800750400774	1.44022242062205e-15	9.05922059839276e-14
fbxb-35	-1.42196759240291	1.47440138223373e-15	9.24576302362093e-14
C41G7.8	1.3158877960803	1.53041896155258e-15	9.56769260887446e-14
T11G6.3	0.866256527109431	1.5704938732866e-15	9.78829458890181e-14
sdz-33	-1.13674895471341	1.69511856793262e-15	1.05329206335096e-13
F21D9.6	-1.54357677965472	1.70205329055011e-15	1.05439622480957e-13
vab-7	-1.41148097624373	1.8421435263639e-15	1.13773232959085e-13
R10H1.1	0.64262798223423	1.89612752257676e-15	1.16754623325412e-13
btb-9	1.25764918790563	2.03042848765841e-15	1.2464879751712e-13
ugt-48	1.33132110212811	2.05996404021242e-15	1.26083367886414e-13
C48D1.1	-1.00448014239031	2.14709100778111e-15	1.31023825289759e-13
C40A11.6	-2.03316409218457	2.26926282181666e-15	1.38067082935708e-13
ZK1128.7	0.9538841055132	2.28180896075494e-15	1.38418458708348e-13
btb-10	-1.22881790488395	2.35196024338151e-15	1.4225184395103e-13
ftn-2	-0.679900404912567	2.3685438921485e-15	1.42832279608235e-13
cysl-1	0.65606905391341	2.57485070826997e-15	1.54816685379891e-13
fbxb-8	-1.65091813824665	2.67620834528428e-15	1.60439082705708e-13
hint-3	0.558559902062201	2.82026377656594e-15	1.68580854924963e-13
B0281.5	-0.942110415409238	2.89443590172063e-15	1.72510067460276e-13
fbxb-78	-1.81776197219763	3.14813451955866e-15	1.87085215067842e-13
F23A7.3	0.897637311826538	3.17766095489134e-15	1.88292530147373e-13
kynu-1	-0.900532388125823	3.20271443586323e-15	1.89228587318936e-13
C35C5.8	0.7558374903824	3.3028977503321e-15	1.94585414149969e-13
ces-2	-2.03115644724582	3.36701482450288e-15	1.97792770279633e-13
sptf-1	-1.2227029701965	3.43386157099271e-15	2.01141639242991e-13
C45G7.4	-1.14917865502833	3.47545246031727e-15	2.02996213275046e-13
gst-4	1.21963715047433	3.54231760296174e-15	2.06312247171928e-13
F14B6.3	-0.841537948847145	3.74530847366902e-15	2.17515173656863e-13
fbxb-3	-1.29964945523688	3.89802712945189e-15	2.25743253845283e-13
F59C12.4	-1.34655724015788	4.06309127433187e-15	2.34637782263182e-13
cbl-1	-0.959937431776909	4.25846696515584e-15	2.45227718785017e-13
clec-5	0.843370606960451	4.90643396874282e-15	2.81747836019689e-13
hrg-1	-1.07950628869026	5.03306331120898e-15	2.88209841095364e-13
sex-1	-0.69366794362554	5.48572009409769e-15	3.13253005261561e-13
ZK185.3	-0.846900827137612	6.04667248454078e-15	3.4432346964197e-13
sprp-4	-1.00274829809711	6.08085535221084e-15	3.4530812768124e-13
lam-1	-0.680272668148537	6.1350728036254e-15	3.47421865164859e-13
slc-25A21	-0.575722802470507	6.21105768854242e-15	3.50753183223405e-13
scav-4	-1.49037793039924	7.13034754374428e-15	4.01558387980067e-13
sid-2	0.526800981899257	7.25232024536348e-15	4.07305447186719e-13
F22H10.6	-0.995591433891497	7.53814663654076e-15	4.21939387027455e-13
T16G1.5	2.62444324712197	7.55416600557886e-15	4.21939387027455e-13
fbxa-14	1.23574032044936	7.98868663011889e-15	4.44993789589974e-13
crp-1	0.814273480308528	8.25506778146115e-15	4.58582474609811e-13
T10G3.3	-1.47085050842111	8.35219115876777e-15	4.62720444061489e-13
gst-42	-0.687219288676222	8.86001080312449e-15	4.895275698602e-13
F43C11.7	0.905455538838948	9.12971655741854e-15	5.03069529874143e-13
T09B4.8	-0.740882810524002	9.74406359030321e-15	5.35478204238087e-13
Y46G5A.20	1.55716353325494	1.0709295974933e-14	5.86944068674412e-13
fbxb-106	-1.35531306988583	1.08349151027778e-14	5.90734981822123e-13
Y105C5B.15	-0.710643518014382	1.08362577989188e-14	5.90734981822123e-13
fbxc-18	-1.19600591858007	1.09035323148939e-14	5.9171142070808e-13
fbxb-51	-1.28307019111336	1.09120581914076e-14	5.9171142070808e-13
C24H12.11	-1.82573978466944	1.11643426277484e-14	6.03790096135083e-13
igcm-1	-1.88540431482505	1.14953038203505e-14	6.20048802109303e-13
mmcm-1	0.289716205836096	1.21323028438432e-14	6.52685965886019e-13
cbs-1	-0.508053510418096	1.25040922752662e-14	6.70921675546631e-13
C08F1.11	-2.38802762275802	1.27892239607583e-14	6.84424359763827e-13
tbx-11	-0.994453293309317	1.3904715213067e-14	7.42177788774746e-13
F35E12.9	1.33345654235762	1.4219751614154e-14	7.57016620437894e-13
tba-7	0.800695789357051	1.43124083479918e-14	7.59970295735057e-13
T16A1.10	-2.06474382711308	1.4625926421532e-14	7.74605735324816e-13
mir-8199	-2.07294380017703	1.53327418258342e-14	8.09941191590512e-13
B0391.14	-3.15614929993443	1.65641622609016e-14	8.72734971906217e-13
R07E5.4	-1.71324443112055	1.68177806310021e-14	8.83819767196851e-13
F28H1.1	-0.747131950708937	1.91743223989399e-14	1.00507864820905e-12
skr-14	-0.756251418063564	2.02349495319591e-14	1.05796182425023e-12
ZK593.3	1.13225466862696	2.03121138738566e-14	1.05928710184503e-12
cyn-2	2.0682998268454	2.15963811926308e-14	1.1233964903841e-12
ref-2	-1.55422411124089	2.17751527144025e-14	1.12982093132114e-12
gadr-5	-0.931150861611901	2.30839282049664e-14	1.19469555517501e-12
mec-8	-0.614125208124343	2.35477911103053e-14	1.21562498401003e-12
C51E3.10	0.847261491805777	2.69372381083131e-14	1.38709813261523e-12
irg-1	3.21483404929341	2.83852529591977e-14	1.45798926192181e-12
C40A11.3	-1.74189000178727	2.97485734280379e-14	1.52418568067514e-12
C49G9.2	1.66926249327544	2.99696803617853e-14	1.53167543908994e-12
F41H10.1	2.76732708228418	3.25579653140022e-14	1.6598066955465e-12
cpt-6	-0.73640737634616	3.44305464732449e-14	1.75090463072773e-12
pycr-1	-0.64053151876399	3.69872634922114e-14	1.8762546589858e-12
tag-234	1.31404099853079	4.12118803367636e-14	2.08538235080312e-12
skr-10	-0.983421236568702	4.3168779052591e-14	2.17565372024979e-12
pxn-2	-1.14244892999108	4.32086978633966e-14	2.17565372024979e-12
ZK896.4	1.0122767265187	4.47940284585526e-14	2.24993691345993e-12
C17E4.20	-0.817031510054014	4.50563316976441e-14	2.25756516886014e-12
E01G4.7	0.993522539056516	4.69652532854966e-14	2.34745885798388e-12
vang-1	-0.560243466739032	5.3850376070084e-14	2.68503228780665e-12
utx-1	-0.448648824838423	5.48370235844463e-14	2.72757487381225e-12
ttr-26	1.46227233431117	5.97491240181731e-14	2.96468772403765e-12
K04A8.20	2.96150361373281	6.15842281144857e-14	3.04834473449015e-12
Y106G6H.13	3.12232864356494	6.81646131301124e-14	3.36591590874127e-12
K12B6.11	2.36873912541013	7.05528280540079e-14	3.47544931062189e-12
fbxb-6	-1.94155648019482	7.22542313474613e-14	3.5507049313369e-12
fbxb-90	-1.16869222810696	7.45150861938417e-14	3.65302615602088e-12
fbxb-45	-1.56073026911388	8.62525190676027e-14	4.21832595047608e-12
itx-1	0.808825980600595	8.72511160248627e-14	4.25697986848751e-12
F35E2.8	-1.75558771607448	8.92483461283445e-14	4.34405699976607e-12
C38H2.2	0.630415163625002	9.31688068470331e-14	4.52410906977173e-12
unk-1	0.895219653578942	9.35542786920111e-14	4.53206189407768e-12
F25A2.1	1.81244413902641	9.48769807651615e-14	4.58388640172429e-12
K04B12.2	-0.591788632013634	9.50725350648681e-14	4.58388640172429e-12
sulp-6	1.89649843418938	1.16609403666556e-13	5.60904950389506e-12
dhs-3	-0.728917035832676	1.18465378214345e-13	5.68494771557711e-12
mua-6	-1.03913697895697	1.22943826311891e-13	5.88604365642619e-12
F53C11.1	0.848885788722442	1.26636446468826e-13	6.04866559617337e-12
ddo-2	0.767376416651478	1.2786398738494e-13	6.08395939381321e-12
F59C6.11	0.903967319166278	1.27970578649889e-13	6.08395939381321e-12
acs-10	3.39113103068994	1.33105539890539e-13	6.31340267281274e-12
sma-4	0.742067775830633	1.35687802373312e-13	6.42098551832784e-12
srh-237	0.998426822391444	1.36744448760275e-13	6.45604333950648e-12
fbxb-115	-1.75772025350051	1.40172861077182e-13	6.6026585230434e-12
Y47G6A.5	0.82751719768802	1.46348232860933e-13	6.87769407902543e-12
fbxa-98	0.941996142232953	1.59780321707253e-13	7.49171815748021e-12
E02C12.8	1.70032509377815	1.61397546004758e-13	7.55022890841023e-12
F01D5.8	0.985377215967828	1.77821816369156e-13	8.29956938820697e-12
W02D7.8	1.55411363443377	1.84985670949489e-13	8.6142643991353e-12
skr-7	-0.81954669596915	1.92515331012887e-13	8.94452479976467e-12
fbxb-116	-1.43794703842254	1.9747692435084e-13	9.15424209638147e-12
F14D7.6	-1.03786734648946	2.08003392975232e-13	9.62039222306034e-12
end-1	-1.39897138060306	2.17429769905134e-13	1.00336722035455e-11
Y57A10C.1	-1.24553783293254	2.24658537828641e-13	1.03439065063759e-11
lgmn-1	1.16266317765427	2.28274889860913e-13	1.04867945470262e-11
F45D11.5	-1.58523545890344	2.36393720092773e-13	1.08354188786021e-11
C27A7.8	-1.63274231010476	2.44841316551051e-13	1.11975190922889e-11
F47D12.6	1.04397224122059	2.45930502948365e-13	1.12222260530657e-11
ZK930.2	0.502365519591864	2.56835133605453e-13	1.16937207935329e-11
nhr-57	1.22451738231921	2.62971177331989e-13	1.19464883959952e-11
F44F1.5	-0.846370252189011	2.66552427211645e-13	1.20823309744737e-11
Y102A11A.6	-0.868270821704531	2.70956822583054e-13	1.22548016019146e-11
noah-1	-2.07057809519954	2.79154642801489e-13	1.25977005801122e-11
spe-15	1.06430714609253	2.80758979074462e-13	1.26421934123771e-11
argn-1	-0.753662164081344	2.85977697271728e-13	1.2848883660057e-11
skr-13	-1.07283952183038	2.92091073734535e-13	1.30947759218314e-11
H06I04.6	0.606287372234036	3.14471614384986e-13	1.40672718005958e-11
21ur-6354	2.35483618360075	3.28800037646131e-13	1.46761117240171e-11
dhs-8	1.38813164555951	3.35028625656268e-13	1.49215472642507e-11
pat-9	-1.15075819285751	3.47031427487283e-13	1.54225292872229e-11
F19B2.5	1.02193940744261	3.95977326803772e-13	1.75595759042289e-11
T25G12.11	-1.06030845272029	3.98452211395862e-13	1.76310791289299e-11
fbxb-92	-1.23068477432028	4.21149871962755e-13	1.85951767441352e-11
C05G5.5	-1.92571816154013	4.31031676761908e-13	1.89430465303784e-11
fkb-5	-0.896204889310852	4.31800369487212e-13	1.89430465303784e-11
lin-12	-0.689286402414674	4.32617653479801e-13	1.89430465303784e-11
pcyt-1	-0.590579807477762	4.32735055015737e-13	1.89430465303784e-11
C01G6.3	-0.535020292639639	4.33784491807404e-13	1.89484110385016e-11
hrg-7	-0.837406650738216	4.44231816407851e-13	1.93633923727627e-11
ZK512.7	-1.0188880331393	4.54249372600867e-13	1.97579147320841e-11
fbxb-13	-1.0641757843878	4.75731107555005e-13	2.0632925140405e-11
fbxa-156	0.798670674136662	4.76385103275996e-13	2.0632925140405e-11
T10B10.4	-0.573087256978888	4.82822975594249e-13	2.086754775914e-11
twk-16	-1.21911722177566	4.84060838586863e-13	2.08769108085047e-11
hch-1	-2.88914619984302	4.95142028187182e-13	2.13098704889065e-11
fbxb-34	-1.0109939938801	5.00392675798811e-13	2.14906039314182e-11
T02E9.5	-1.86126044147724	5.06227438624226e-13	2.16956132658177e-11
linc-37	2.38785282353907	5.27982998193752e-13	2.25806619917884e-11
fkb-3	-0.776569333015258	5.4510682776095e-13	2.32643400415806e-11
dmd-7	-0.701261683513863	5.54209981363891e-13	2.36035721854625e-11
B0272.4	-0.594009310826498	6.36239061662117e-13	2.7040821491806e-11
K12H6.7	-1.14144166893862	6.42568669798676e-13	2.72034087910059e-11
dhs-2	-0.542674807006923	6.42725942672593e-13	2.72034087910059e-11
fbxc-34	-1.96192577853959	6.51861673962153e-13	2.75330747950584e-11
fbxb-111	-1.35851388980696	7.21236628279537e-13	3.04004956534404e-11
btb-8	-1.19695535713934	7.3202889805265e-13	3.07919069195274e-11
linc-12	-1.6154682126993	7.97932910311048e-13	3.34951591077798e-11
fmo-3	-1.2972994522133	8.02108671042481e-13	3.360144992238e-11
ztf-29	-0.701530989486935	8.18134959141939e-13	3.4202725909486e-11
skr-8	-0.950913699841846	8.28132000169268e-13	3.45478568247448e-11
let-4	-1.9225752570898	8.29770469155687e-13	3.45478568247448e-11
T24C4.4	2.34223766482693	8.49101261352588e-13	3.52808477354288e-11
C17H12.12	3.10823297950197	1.03238092595733e-12	4.28092561244334e-11
T04B8.2	-1.68409439891477	1.06235304119639e-12	4.396292150036e-11
T28F4.5	1.04090281324973	1.11774543622989e-12	4.61617574805001e-11
clec-69	-1.89731069642071	1.2212346985972e-12	5.03340744827067e-11
ssp-35	3.06971633991937	1.26621693698597e-12	5.20830439493043e-11
T04F8.7	0.926253541710141	1.30234647459779e-12	5.34615842975955e-11
fbxa-26	1.20088111831857	1.34236602676347e-12	5.4993965300853e-11
fbxc-39	-1.091031571704	1.43646872351628e-12	5.87314602296867e-11
ZK430.5	-0.884935213279037	1.46521113127477e-12	5.9784790780265e-11
hpo-15	0.597282106607847	1.46808027059106e-12	5.9784790780265e-11
fbxb-100	-1.42508432755585	1.52313645356973e-12	6.19035358256977e-11
gadr-3	-0.748125048658985	1.53127576798191e-12	6.21108542159805e-11
T14G10.8	0.748779896269458	1.54254709083913e-12	6.2444138966385e-11
F49B2.7	-1.77979909709018	1.62437531167005e-12	6.56266887282033e-11
rhr-1	-0.564664374697212	1.62894936550985e-12	6.56816802349464e-11
dex-1	-0.983680197685614	1.66892984638412e-12	6.71612851370682e-11
fbxa-61	0.875571679193375	1.72492230415911e-12	6.92781663338401e-11
sbp-1	0.600771981664845	1.7814055976243e-12	7.14064208475169e-11
F17A2.13	-0.562507974075338	1.79786945577278e-12	7.19253332375010e-11
ugt-54	0.932443858592429	1.84687184444037e-12	7.37414084294814e-11
C32H11.4	1.70951431817008	1.85185127259769e-12	7.37960927206911e-11
C31C9.2	0.964035614698453	2.04308448883108e-12	8.12583194653186e-11
K04G2.4	2.75809358383327	2.10835202871604e-12	8.36913408214408e-11
gbh-1	-0.453490732655435	2.28108223155671e-12	9.03724109684378e-11
Y47D3A.31	2.86263265670872	2.31759685542714e-12	9.16414555425474e-11
ceh-51	-1.1127079753248	2.34366801142922e-12	9.2493446250285e-11
F53B6.4	2.53763241722336	2.55492673811529e-12	1.00636545871466e-10
F07A5.2	2.99395970408493	2.60333099970764e-12	1.02345953128891e-10
unc-120	-0.889838142880445	2.62675696891636e-12	1.0306870002986e-10
Y38H6C.23	1.91972632046411	2.64145460109662e-12	1.03438985783124e-10
fbxc-14	-1.36187526551362	2.6463136312955e-12	1.03438985783124e-10
sem-2	-0.52379527852459	2.72762010151702e-12	1.06413621632276e-10
hsp-17	1.13697597443503	2.78197406761954e-12	1.08327420693993e-10
oatr-1	-0.438016322394491	2.90879702021696e-12	1.13050451491056e-10
glt-5	0.832594555817716	2.94140092986533e-12	1.14100681611455e-10
C50E10.1	2.92758839297517	2.98491827713569e-12	1.15569477915691e-10
T28C6.10	-1.72284328591462	3.03811136659621e-12	1.17406636422167e-10
kmo-1	-0.931617604155084	3.10288725237238e-12	1.19683630377828e-10
Y43C5A.3	0.97316061517587	3.21057850633776e-12	1.23415740772997e-10
F15B10.3	-0.936671026427645	3.21171912592254e-12	1.23415740772997e-10
gba-2	-1.13375003185236	3.3732235428897e-12	1.29378628306368e-10
ipp-5	0.519153510495339	3.43386527982394e-12	1.31457879991462e-10
klf-3	1.13518957304816	3.46986605527816e-12	1.32587797697292e-10
B0284.3	-0.998388254677891	3.48192681679696e-12	1.32800428947351e-10
F58G1.3	2.73193115453111	3.53950988836882e-12	1.3474525260321e-10
W06H8.2	1.06812919752952	3.59761941474581e-12	1.36702850735406e-10
K01H12.4	3.52660886295816	3.76919740183796e-12	1.42956776411453e-10
F40G9.15	-1.44131581116626	3.80132612996607e-12	1.43908351990549e-10
sdz-14	-0.849797484357817	3.81110169620678e-12	1.44011741174779e-10
lfe-2	0.511921192901798	3.85746433776261e-12	1.45494729625242e-10
fbxc-36	-0.706512265623415	3.9586188120662e-12	1.4903507251394e-10
Y65B4A.9	3.16867328566741	3.98573400683229e-12	1.4954014343566e-10
F36A2.10	2.90928491709441	3.98666429449858e-12	1.4954014343566e-10
D2007.1	0.552118327554545	4.10188158830851e-12	1.53580156245038e-10
F42C5.4	1.09495001267913	4.1450702126346e-12	1.54913474144221e-10
M02H5.8	1.35208189117126	4.35635055732926e-12	1.62512544604894e-10
wht-6	1.37329395681607	4.42563530204405e-12	1.64506095553158e-10
ethe-1	0.707040104007209	4.42588429067342e-12	1.64506095553158e-10
acs-5	-0.558776367772302	4.4452779896991e-12	1.64927074307475e-10
F08H9.2	3.1854214595334	4.48094452849336e-12	1.6594918296375e-10
fbxc-28	-0.879645818360271	4.5958722474145e-12	1.69897678759303e-10
slc-17.5	0.983288932597477	4.86997497358899e-12	1.79705592752851e-10
C18A11.1	1.14319250339252	4.97578643873422e-12	1.83279283183862e-10
fbxb-19	-1.46185317609369	5.00441323135772e-12	1.84002193684615e-10
K06A5.2	2.95496987291868	5.12625392160459e-12	1.88143642584134e-10
elo-8	2.2916777581096	5.1673878093778e-12	1.89257285751922e-10
ivns-1	-0.446723025302532	5.17511239716892e-12	1.89257285751922e-10
tps-1	0.446085228145282	5.20833435987827e-12	1.90132105926771e-10
DH11.2	0.746582925541685	5.26179708395542e-12	1.91741386430126e-10
ZK1320.9	0.46906653049696	5.28918701691833e-12	1.92396530581604e-10
sir-2.3	0.833667279469284	5.41794241730838e-12	1.96730012143935e-10
ZC239.22	1.73071465546354	5.70095415184065e-12	2.06639371854749e-10
cest-2.3	-1.56240925033301	5.78476981314248e-12	2.09026763085702e-10
cnc-7	-2.74203661449271	5.78726937858962e-12	2.09026763085702e-10
dct-16	-0.634264846947107	5.88023150946301e-12	2.12009828479634e-10
C06A1.3	2.263685737719	6.45807225234556e-12	2.32433751856867e-10
cutl-2	-2.42316442105035	6.57212616442023e-12	2.36122979225383e-10
hxk-3	0.238872785411567	6.63910138339654e-12	2.38110788738203e-10
fbxb-38	-1.32095470279858	7.05887526562883e-12	2.52722569273643e-10
T26E3.11	-1.69026879179159	7.25972928570751e-12	2.5945917095755e-10
C05D12.4	-0.949264550856564	7.41869578132979e-12	2.64677832212434e-10
ces-1	-2.44681341552654	7.46606630664967e-12	2.65903821440486e-10
Y57G11C.5	2.06802952780294	8.36671996767802e-12	2.9746235878129e-10
T04G9.4	-0.714621428427082	8.72870531769531e-12	3.09793268766745e-10
sdz-21	-0.847167164887744	8.89945511554233e-12	3.15305998140437e-10
F32A11.3	2.65647852184687	9.0410943684624e-12	3.19770055665185e-10
F22D6.9	0.428614218628147	9.12482804476428e-12	3.22174196406073e-10
W04A8.3	-1.44020118446965	9.30100114192847e-12	3.27828217835248e-10
F55C12.19	1.08064799367048	9.59364365014106e-12	3.37560855662364e-10
ins-34	-0.611431262415358	9.64731712236029e-12	3.38365398370124e-10
F21C10.10	1.00973791880183	9.64961244679266e-12	3.38365398370124e-10
ZC250.4	-1.26680865816492	9.89705923347048e-12	3.46447914229173e-10
acs-2	1.56607334993553	1.00287022573634e-11	3.50456000422702e-10
unc-130	-1.0853579129644	1.0476770109682e-11	3.64956586971363e-10
C24H12.9	-1.56210532331525	1.04793580468713e-11	3.64956586971363e-10
C14C11.1	1.72833828590848	1.08419030304077e-11	3.76940516412628e-10
tbc-14	0.330023135872766	1.09882712384222e-11	3.81380694273455e-10
frpr-11	1.25338543808628	1.11873025436536e-11	3.8763055237273e-10
C49C3.9	0.748519777861262	1.12399857143434e-11	3.88797001621527e-10
F13B12.2	0.609978108866899	1.13967175420252e-11	3.93552528229088e-10
mab-31	0.580289483913085	1.16612662053833e-11	4.02008878645278e-10
C08F8.15	-1.30860092295265	1.27318276839633e-11	4.38176352429734e-10
snf-5	3.10048032513112	1.28637580812535e-11	4.41972783958094e-10
sdz-29	-0.921148547713024	1.30320383935219e-11	4.47003290065047e-10
fbxb-102	-1.47973591896335	1.37676757026622e-11	4.71444881724494e-10
clec-94	-19.3575575360976	1.50249364759819e-11	5.13636749796818e-10
T05H10.4	-0.464099553822847	1.51174790231271e-11	5.15937602119846e-10
spp-4	-0.601909133699632	1.57243520675587e-11	5.35754882195171e-10
M01G12.9	0.995629937594248	1.59269888220678e-11	5.41756127270437e-10
C34E7.4	-0.76165958148241	1.65088875748585e-11	5.6061659251301e-10
pqn-37	-0.846365821741403	1.67051411259855e-11	5.66340298571344e-10
W04B5.1	1.04169137093578	1.7017870781728e-11	5.75987305282889e-10
F33H12.7	3.23044979975295	1.71062537377995e-11	5.78021727540225e-10
swan-1	-0.345212504232109	1.71466092805422e-11	5.78429263237827e-10
hsp-12.3	1.21743875473255	1.75042999642477e-11	5.89522906374161e-10
C30G7.3	3.12926451203586	1.75678367657262e-11	5.9068961677918e-10
pin-2	0.615461258556519	1.76725870496913e-11	5.93235955758357e-10
hrg-4	-1.47277062431101	1.78497091090701e-11	5.978994371122e-10
C32B5.15	-1.76523456994753	1.78700071455048e-11	5.978994371122e-10
trap-2	-0.426568869500233	1.80633906509742e-11	6.03382181499781e-10
dnj-27	-0.507501831607221	1.8523375037796e-11	6.17737937842844e-10
pes-1	-0.6367165082476	1.87049117601265e-11	6.22776076730076e-10
fmo-2	1.90989597558437	1.96405103338182e-11	6.52863337811782e-10
cyp-35C1	-0.844421741009612	2.04128432602028e-11	6.77434666831697e-10
fbxb-33	-1.08218076970477	2.11549855051937e-11	7.00926043245828e-10
F36H5.17	-1.21115429628227	2.12502591019252e-11	7.02943441457375e-10
K12C11.7	0.845236041295593	2.19076311729795e-11	7.23518100273377e-10
nhr-103	0.735031664341882	2.22209618430883e-11	7.32682456384281e-10
chd-3	-0.551543681962402	2.23339246903184e-11	7.35221292180644e-10
nhr-2	-0.495823383757093	2.27552360953639e-11	7.4788632073557e-10
fbxa-27	1.39614531084307	2.29639513513486e-11	7.53534602689598e-10
lin-10	-0.449989821282296	2.31817566076412e-11	7.59462580657066e-10
coel-1	1.20120819619746	2.42163596402929e-11	7.92088064202414e-10
ddr-2	-1.10212075631978	2.45869350820773e-11	8.02924463071734e-10
C33D9.3	0.65301684981147	2.5539777676869e-11	8.32710805499574e-10
hlh-2	-0.450098124707489	2.57337685584594e-11	8.37699730319405e-10
T27A1.3	-1.05282713196458	2.61505098392456e-11	8.49912357144194e-10
T04F8.2	-0.29572233961863	2.66613073077179e-11	8.65138262367742e-10
B0546.4	0.528126440094557	2.68820690244177e-11	8.70919393131808e-10
spe-26	1.85773264168531	2.72253976778162e-11	8.80646842923413e-10
irx-1	-0.678931047968281	2.73378251632186e-11	8.82886508391275e-10
col-147	2.87305604898361	2.76659189952305e-11	8.91318786749438e-10
C28G1.10	0.734314163463953	2.76861238363202e-11	8.91318786749438e-10
zip-12	0.909002237675345	2.84645863701454e-11	9.14939526988808e-10
clec-73	3.44917013734591	2.87842010791913e-11	9.23760475136432e-10
Y69E1A.2	3.34747334956558	2.89863174091121e-11	9.28788850775045e-10
R11A5.3	-0.898617498367984	2.91022105833599e-11	9.31043021839791e-10
EEED8.4	-0.830991829643681	2.93065402962961e-11	9.34895933529621e-10
mir-238	2.17856536415851	2.93560307523621e-11	9.34895933529621e-10
ins-2	-2.64067412715805	2.93598390317476e-11	9.34895933529621e-10
dao-3	-0.467702758760827	2.94442630305600e-11	9.361260795237e-10
fbxc-21	-1.35665849042667	2.98024540377074e-11	9.46042807287037e-10
ttr-12	4.05283145408757	2.99194009965982e-11	9.48282658253421e-10
skr-12	-0.91881007053329	3.03620901069314e-11	9.60823851479874e-10
nhr-8	0.740562106710991	3.0778190920326e-11	9.72486177719049e-10
W04A8.4	-1.61238193375621	3.1682195705862e-11	9.99504825331694e-10
apm-3	-0.372300920976443	3.21500467458116e-11	1.01270170358186e-09
fbxb-101	-2.04348551744726	3.24761830136344e-11	1.02140093745804e-09
cdc-25.2	-0.488246122726738	3.2738896550962e-11	1.02808181596208e-09
gpx-7	0.823604957590467	3.32053905106547e-11	1.04113159234557e-09
C11H1.9	-0.725000509143965	3.42185531295288e-11	1.07125556145017e-09
ttr-52	-2.17989831700011	3.54050661959943e-11	1.10670606765246e-09
T05F1.5	3.21143142853773	3.61635928434119e-11	1.12869057785934e-09
fbxb-24	-0.963981730615032	3.73475670859297e-11	1.16386633222204e-09
ZK1010.5	2.68141721923329	3.75476773994114e-11	1.16832141411898e-09
C44H9.7	-2.94064871494936	3.78193018269031e-11	1.17498478305073e-09
ugt-28	0.645834606320379	3.80750733915685e-11	1.18113615378427e-09
nhr-18	0.917691878920862	3.89974525530417e-11	1.20791654930581e-09
T28C6.3	-0.764708259233239	3.93492116648897e-11	1.21696813020475e-09
C18H7.11	0.948446343641702	4.13492049259998e-11	1.27689093097011e-09
let-653	-1.01994036323512	4.15649941600445e-11	1.28161866608415e-09
Y58A7A.1	0.752654850788634	4.17377513038449e-11	1.28500730407305e-09
pals-18	0.901767176579289	4.1815414556698e-11	1.28546243576327e-09
F21D9.11	-1.44824750608243	4.20568091397327e-11	1.29094196583117e-09
C17E4.2	-0.887235574989263	4.28132893884661e-11	1.3121920164444e-09
ten-1	-0.446055952395429	4.42055451270681e-11	1.35164518538442e-09
T05A7.13	-2.72128456909001	4.4232775474352e-11	1.35164518538442e-09
coh-1	-0.333293550567293	4.43816622510719e-11	1.35291266862673e-09
fbxb-43	-1.09365147511692	4.44066135424614e-11	1.35291266862673e-09
F53F10.2	0.358631181890161	4.51019137479928e-11	1.37205122433068e-09
fbxb-95	-1.10264162294977	4.64020712959248e-11	1.40950600817621e-09
ssp-10	2.40517294573103	4.6529972247587e-11	1.41003872713557e-09
C27D8.1	2.85902370367622	4.65575571499539e-11	1.41003872713557e-09
F52H2.4	0.675870656652428	4.68965084460696e-11	1.41820313929438e-09
C54G4.2	3.43377852170366	4.76243566633612e-11	1.43808674042702e-09
C24H12.18	-1.66118914150657	4.83081369853708e-11	1.45658295633029e-09
C54G4.3	3.42222405878015	5.05841559161491e-11	1.52296303298061e-09
pyc-1	0.413769791503423	5.12484123364447e-11	1.5406930785205e-09
ZK858.2	1.99104249559665	5.13661635200053e-11	1.54196546378777e-09
vet-1	-0.905311069366481	5.17069531923047e-11	1.54991971277168e-09
lag-2	-1.12137625002449	5.18911401861552e-11	1.55316336577682e-09
ubc-8	0.884630251363533	5.19933331803156e-11	1.55394694474443e-09
crb-3	0.841393306774633	5.31825904700815e-11	1.58717036055456e-09
D1081.5	3.92042714709878	5.41043579215944e-11	1.6123256399288e-09
fbxb-15	-0.958378407243229	5.94627293891725e-11	1.76942733173632e-09
bca-1	0.475169960336208	6.05610514832964e-11	1.79695237872601e-09
ZK1053.2	3.32523860695517	6.05635273170385e-11	1.79695237872601e-09
F25B5.6	0.252775459276129	6.4507271154698e-11	1.91119151335578e-09
W10D9.2	-1.58403559754715	6.79110452822048e-11	2.00912517902187e-09
fbxb-44	-1.14703069303786	6.84909439361296e-11	2.02335313133858e-09
fkh-9	0.685980264526681	6.87793409563725e-11	2.02894093386886e-09
ttr-36	-0.575172326757214	6.91714964044011e-11	2.03756902160688e-09
F40G9.20	-1.72003365822264	6.92728639399043e-11	2.03761893168844e-09
F56B3.6	2.63711732279201	6.96572127719333e-11	2.04598046077102e-09
tsct-1	0.605711357703417	7.36092707697090e-11	2.15693193564409e-09
acox-1.1	-0.600721409864062	7.36456728992602e-11	2.15693193564409e-09
Y51B9A.6	2.03718985845272	7.37811780278754e-11	2.15780918801696e-09
F47D12.7	3.19384564593162	7.51839652715624e-11	2.19569400292364e-09
fbxl-1	0.601454414739272	7.53102661698045e-11	2.19624503753112e-09
Y48C3A.5	0.856774885633668	7.60873414968236e-11	2.21574575814753e-09
hil-6	-1.56582972743376	7.98591317422946e-11	2.31963447105504e-09
K02E7.7	-2.77463906361032	7.98817525618917e-11	2.31963447105504e-09
fbxa-32	1.12392464536231	8.12125465619643e-11	2.35493346009395e-09
nrde-3	-0.351665082144135	8.20674798469901e-11	2.37635338599436e-09
Y106G6D.2	-0.974170557570062	8.22908015897318e-11	2.37944958542983e-09
cyp-25A2	-0.981160323147127	8.37575455022322e-11	2.41843997556798e-09
F52H3.6	2.92619865398246	8.94677603319180e-11	2.5796747876804e-09
arrd-7	0.748440026576888	9.08305672214505e-11	2.61124298571283e-09
abu-10	2.88669866974051	9.08507033936935e-11	2.61124298571283e-09
chd-7	-0.555652596678302	9.09458008035775e-11	2.61124298571283e-09
slc-17.4	0.656085312079998	9.32794435000118e-11	2.67449041159992e-09
msp-31	3.0844107987638	9.50380201099484e-11	2.7210955813833e-09
C16A11.7	3.3075418795156	9.67916085534093e-11	2.76704988080784e-09
F27C1.1	3.25929829225455	9.69137462534078e-11	2.76704988080784e-09
F56C3.9	1.95076671131462	9.78389278337197e-11	2.78956931897452e-09
Y39G10AR.16	2.62777894521626	1.00293848969337e-10	2.85558099509771e-09
T02G5.14	-1.07374253567966	1.0155044453366e-10	2.88733760445288e-09
lido-2	-0.792127585166113	1.02803706568782e-10	2.91891135192445e-09
ZK550.5	3.22646648347332	1.04165313086473e-10	2.95346948048096e-09
cest-3	-0.735304882148311	1.04639884493506e-10	2.96281600928081e-09
smz-2	2.6741118813345	1.04892306250208e-10	2.96585534809542e-09
C35A11.4	-1.04042250261325	1.05266217733847e-10	2.97231669769757e-09
Y57G7A.5	2.75186484919665	1.05440159281998e-10	2.97312162234744e-09
F21H7.5	3.21428391209015	1.08024705942412e-10	3.04156038272705e-09
alh-12	-0.524732604986989	1.08164868084066e-10	3.04156038272705e-09
ceh-40	-0.604874231489965	1.09992948391546e-10	3.08871681863789e-09
Y53F4B.19	2.30851681857677	1.11827426372249e-10	3.13592328851561e-09
C15C6.2	3.0738723790132	1.15469050770491e-10	3.23360795191937e-09
C44H9.5	0.961920398856206	1.17132795846373e-10	3.27440091454176e-09
nhr-168	-0.874945370749406	1.17246072956247e-10	3.27440091454176e-09
srp-6	0.476012601701489	1.25314596627827e-10	3.49496084428741e-09
C16B8.4	-0.859559441887051	1.25709578502044e-10	3.50120015438322e-09
aakg-2	-0.24353180836837	1.32054664649476e-10	3.67291633935952e-09
R10E9.2	3.13502992556212	1.32699710849557e-10	3.68584264795856e-09
gcsh-1	-1.12592471236311	1.33007998891799e-10	3.68939283764594e-09
col-43	-1.87747639977776	1.33291417921057e-10	3.69224452108424e-09
nhr-58	1.20149054089967	1.34994754842728e-10	3.73436775811892e-09
F54D5.4	0.470215195728796	1.35519784212487e-10	3.74382560629172e-09
M03B6.4	-0.486269353390589	1.39136700029884e-10	3.83855810892161e-09
K04F1.9	1.03486673715926	1.39872933673839e-10	3.85366897991144e-09
F53A2.3	-0.468824547811589	1.40361108740292e-10	3.86191405918949e-09
mtl-2	-1.10349894372477	1.41559821496839e-10	3.8896605253493e-09
spe-8	3.84831174737723	1.4221134313666e-10	3.90231743321173e-09
alg-4	3.43241981877934	1.43086288391821e-10	3.92106299409383e-09
B0261.6	3.41323175506827	1.46622459853766e-10	4.01258761283875e-09
F47B3.7	3.45482153123052	1.48767240311112e-10	4.06584049957228e-09
C26E1.2	1.05279624153418	1.51861627830907e-10	4.14486950300031e-09
H40L08.1	-0.242678246868346	1.57772633061859e-10	4.29990239588366e-09
T05A7.6	3.20302938505085	1.57962466336087e-10	4.29990239588366e-09
C44C1.1	-0.693183217587986	1.62045496604019e-10	4.40518096685632e-09
Y43F8C.13	-0.671112052904151	1.63272505796976e-10	4.43264254449877e-09
M70.3	3.02449025672729	1.68249194863706e-10	4.56169534562167e-09
F36D3.4	3.29697621333718	1.68881592803572e-10	4.57277669097142e-09
F37A4.4	2.87122655047532	1.69944849360273e-10	4.59547957073024e-09
K07A3.3	2.84125996178745	1.74032107407274e-10	4.69978648841071e-09
F35H8.4	2.31180542791167	1.80019676023544e-10	4.85506891418114e-09
smz-1	2.43444247561562	1.826228001757e-10	4.91878511724878e-09
F49C12.15	2.54053510020605	1.83931903368551e-10	4.94752618495169e-09
hst-3.2	-1.22614898189982	1.88680900009458e-10	5.06859873704777e-09
kap-1	-0.677122564411587	1.91530149168277e-10	5.13838692840824e-09
cest-32	0.748382687474845	1.92128847075969e-10	5.14216922514274e-09
nhr-110	0.949181975375686	1.9217420574324e-10	5.14216922514274e-09
nspd-7	2.41022791745692	1.94086842782697e-10	5.18655859739434e-09
lact-4	0.925346013080642	1.95986996523067e-10	5.23049891634604e-09
K03A11.5	1.09388968464533	2.01423638229693e-10	5.36858335896951e-09
cld-9	0.723536902663152	2.01931469155285e-10	5.37024348134122e-09
ugt-27	2.04654194073124	2.02011311312009e-10	5.37024348134122e-09
sdz-30	-0.912573736978754	2.0273750590613e-10	5.38254913407665e-09
mup-4	-0.848594239159151	2.03224855916919e-10	5.38848992154289e-09
dlat-2	0.246852208271127	2.07798012341171e-10	5.50260980089451e-09
fbxb-54	-0.985171454491279	2.10707354387157e-10	5.57243265942645e-09
D1086.17	2.91424141520594	2.13895106270719e-10	5.64942849805207e-09
R03H10.12	1.23665635808219	2.18975423503949e-10	5.77614784863385e-09
lrch-1	-0.641631417786123	2.21465876304295e-10	5.83431302743391e-09
hlh-11	0.542172781093	2.2319234174016e-10	5.87222785353165e-09
kgb-2	1.50578142221762	2.2432015897979e-10	5.88723110587434e-09
F38H4.4	3.41430012632171	2.24338552632985e-10	5.88723110587434e-09
F35D2.3	-0.936384181288443	2.2683730856243e-10	5.9451732037715e-09
ttbk-4	3.05424032206401	2.32468240143206e-10	6.08495292349239e-09
fbxb-81	-0.928028120063357	2.33270399415284e-10	6.09814165632564e-09
F57F4.1	2.36500663340977	2.40652722177143e-10	6.28309527390465e-09
C04E12.5	-1.69971258218506	2.44399598574921e-10	6.3704808538789e-09
F45D11.1	-3.30590106603031	2.44622974626764e-10	6.3704808538789e-09
K01F9.2	1.06154997050704	2.45826680117159e-10	6.38734980466215e-09
ent-4	-1.03815354013344	2.45895626682439e-10	6.38734980466215e-09
F55A11.11	2.00962363274195	2.48744148179564e-10	6.45314292034875e-09
cln-3.1	-0.820910399623827	2.60319471142559e-10	6.74488079666328e-09
cup-16	0.823062382299658	2.61213745425886e-10	6.75948430093846e-09
Y71A12B.18	-0.938339139759372	2.64810871083808e-10	6.84390472511541e-09
clec-79	3.06073578567092	2.69199826318945e-10	6.94855056747246e-09
D1086.3	-0.96443977195727	2.70430749515867e-10	6.97152057043236e-09
Y47G6A.31	-0.606299183389526	2.78511151682593e-10	7.17078523154566e-09
C49F5.8	-2.45071411124833	2.85044598753389e-10	7.32976947461074e-09
vab-23	-0.947507557703337	2.89843692329022e-10	7.44381231442487e-09
clp-6	1.8450794269203	2.98856802275134e-10	7.66565822949883e-09
T26E3.8	-1.05251206560181	3.03438307640297e-10	7.77342020437417e-09
fah-1	-0.401865886402741	3.13597584980458e-10	8.02362381696558e-09
ZC317.6	1.65341705296354	3.20226854960543e-10	8.18299699494797e-09
ver-4	-1.46174502443905	3.21625526001289e-10	8.2084776879455e-09
T26H5.9	2.42032188589891	3.25070580221347e-10	8.28605719634039e-09
dsl-1	-0.955787170804107	3.35565736783197e-10	8.54292697018543e-09
F53F1.4	-1.45789608487525	3.39401019021871e-10	8.62981969137327e-09
Y51H4A.7	-0.498720822232055	3.44793257204823e-10	8.7560354745816e-09
nra-3	-0.347206397395094	3.50180205919072e-10	8.88180390769676e-09
sdz-9	-0.841823496612733	3.51233595990247e-10	8.89748253138613e-09
obr-3	0.318867389386274	3.51910131599128e-10	8.9035876488626e-09
gska-3	2.23918321852041	3.62591075318005e-10	9.16248374873421e-09
wrt-10	-2.28132388367021	3.65734197051814e-10	9.23049900040769e-09
F22H10.2	1.05236892587939	3.67553864662607e-10	9.26498601146445e-09
sepa-1	-0.873970091719897	3.77450533893657e-10	9.49082862010561e-09
C09D4.1	0.757789056860637	3.77755644142641e-10	9.49082862010561e-09
cls-3	-0.462543305188717	3.77906104620944e-10	9.49082862010561e-09
oac-57	0.882427233898948	3.79178289411769e-10	9.50002910028969e-09
F32H2.7	3.48554056689584	3.79201865960788e-10	9.50002910028969e-09
F11D5.7	-1.22946085211712	3.84604905899396e-10	9.62359619498329e-09
T28H11.7	2.78819584899471	3.94751344043799e-10	9.86540553335867e-09
C24H12.8	-1.95370136369865	3.98254675960064e-10	9.94080627674186e-09
Y17D7C.4	-1.97818145674122	4.01067373246579e-10	9.99880525765832e-09
mthf-1	0.292929325512874	4.09468758925748e-10	1.01958219716432e-08
K10D11.5	0.801098521171602	4.11270064718984e-10	1.02282164635647e-08
dhs-27	-0.538352213190797	4.13250152181528e-10	1.02649730996926e-08
K09C6.7	3.38635710435038	4.16314229799414e-10	1.03285337376085e-08
fbxa-3	1.21949924795042	4.25366592961495e-10	1.05403263756507e-08
math-24	0.930238355942857	4.29051457703389e-10	1.06187638617801e-08
C50F4.8	-0.900574173802689	4.31732376868569e-10	1.06721946557729e-08
ZK512.8	2.27022113850576	4.36582650667236e-10	1.07790569173796e-08
glit-1	-0.632168180053933	4.4245149907885e-10	1.09107792468865e-08
nlr-1	-0.731135329863836	4.45673533736986e-10	1.09769928315484e-08
clec-123	2.74305262930996	4.60929027219679e-10	1.13390759367652e-08
acdh-5	2.18363977077235	4.6747071789087e-10	1.14861825550998e-08
fbxa-82	2.04725846084614	4.90074446981902e-10	1.20271211520421e-08
F17E9.5	3.39378734557206	4.93195517843001e-10	1.20836826166339e-08
pnk-4	-0.49581790572847	4.93561365009503e-10	1.20836826166339e-08
C29F9.2	0.797019126374725	4.99867318655317e-10	1.22234301378836e-08
decr-1.2	3.12448653240602	5.07945085997957e-10	1.24061187491711e-08
W02B12.12	3.16492688085916	5.11319962589755e-10	1.24736443857069e-08
K08C9.2	3.17844529764556	5.12406118014274e-10	1.2485242277194e-08
fbxb-83	-1.11147953788993	5.21996344596339e-10	1.27037753245035e-08
pitp-1	0.480603999491665	5.47904532239933e-10	1.33184451279203e-08
C25F9.14	1.01766802985931	5.4947768972249e-10	1.33408223408514e-08
nhr-121	-0.736646103768669	5.531823408708e-10	1.34125246497778e-08
W03D2.15	-1.4722907164578	5.53743129893482e-10	1.34125246497778e-08
F56A11.6	2.57379092819808	5.56095357235625e-10	1.34535590390153e-08
gadr-6	-0.353988200977502	5.58337504042684e-10	1.34833044213959e-08
F58D2.3	-1.54502564003974	5.5877736676044e-10	1.34833044213959e-08
lec-11	0.822697228463943	5.5930353418499e-10	1.34833044213959e-08
F42G2.5	0.949465385679728	5.64473567229708e-10	1.3591911819643e-08
H40L08.2	-1.10651786511496	5.65350274343078e-10	1.35970066569359e-08
lido-3	-0.648618866729291	5.68343719166851e-10	1.36529384852267e-08
C33F10.11	2.83551981494992	5.78672885645449e-10	1.3884753287852e-08
Y37E11B.10	3.17188954138757	5.79620516205032e-10	1.38911866503863e-08
K09E4.1	2.40379028735799	5.94087811818834e-10	1.42212378653541e-08
spe-4	2.08336411612632	6.04348468262962e-10	1.44499365341517e-08
nep-1	-0.390838457870282	6.08309238758157e-10	1.45276469251554e-08
cyp-13A4	0.917817772144027	6.24958167102398e-10	1.49078410852676e-08
tag-10	-0.751656537999847	6.28673973398156e-10	1.49790000444971e-08
hasp-2	2.56585556512784	6.3017018405242e-10	1.49971700495735e-08
Y43B11AR.3	0.449144348565277	6.512613538367e-10	1.54810882052136e-08
F09C8.2	-0.42098069845049	6.54882741592087e-10	1.55435186742183e-08
Y38F2AR.10	1.83717318585325	6.5540835969164e-10	1.55435186742183e-08
Y69A2AR.19	2.96365593881939	6.56414018041222e-10	1.55493299777714e-08
21ur-9213	2.80985979654881	6.61377234939252e-10	1.56487671456749e-08
sox-4	0.676168280144296	6.64210699062697e-10	1.56976408334552e-08
ccch-1	0.699332754141131	6.67891641367229e-10	1.57664074185569e-08
ceh-16	-1.45915232753922	6.70666894912947e-10	1.58136601299947e-08
R03D7.5	1.13662966788478	6.73103757075605e-10	1.58528342233832e-08
oac-32	1.70104094543973	6.74783320570016e-10	1.58741029026615e-08
B0272.3	-0.296247799869562	6.83831819775883e-10	1.60684757375614e-08
spch-3	3.12646900822556	6.85229813256207e-10	1.60828393483314e-08
ceh-13	-0.682266949804613	6.86678538683962e-10	1.60983593650415e-08
catp-4	2.39720920651712	6.89103667479527e-10	1.61367082179656e-08
tag-131	0.242359672420834	6.90962431808029e-10	1.61617219604709e-08
lys-1	0.523969374398952	6.95134903018517e-10	1.62272734255641e-08
Y106G6D.3	2.49804478428593	6.95352517771078e-10	1.62272734255641e-08
pes-7	0.359372970601283	6.97323281722489e-10	1.62547090630021e-08
F55B12.11	-1.44813263484438	7.04007665990621e-10	1.63918322503944e-08
Y43F8C.9	1.87331092790275	7.06632431280687e-10	1.64319305173514e-08
C33F10.12	2.87767047705866	7.07337418934071e-10	1.64319305173514e-08
rmd-3	3.21555994109047	7.13789488125571e-10	1.65629948986959e-08
Y60A3A.25	1.07649026033852	7.15871791511236e-10	1.65835587792788e-08
M04C3.1	1.02026014596672	7.16298116817647e-10	1.65835587792788e-08
C05C12.5	3.06517559208939	7.18515855052457e-10	1.6602317308203e-08
bcat-1	0.409197492038793	7.18732613498981e-10	1.6602317308203e-08
fbxb-67	-0.44124154554993	7.21128335773884e-10	1.66388561718121e-08
ceh-45	-1.58885963645107	7.2999093763872e-10	1.68243570892315e-08
R09E10.6	2.99983778520746	7.44942653273653e-10	1.71374926522777e-08
F36H5.8	-1.40947697391817	7.45254168560136e-10	1.71374926522777e-08
best-7	0.830342242319085	7.55253974714794e-10	1.73479292192073e-08
bet-2	-0.403974002576156	7.7385551444455e-10	1.77552505968462e-08
M02B1.4	2.78935747632917	7.78274219726305e-10	1.78297249776556e-08
fbxb-30	-1.33011784304775	7.78845786090421e-10	1.78297249776556e-08
hlh-16	-1.42008996883359	7.81059375368924e-10	1.78603991170771e-08
ZC581.7	2.52150413380654	7.93659466025963e-10	1.81282463284567e-08
fbxb-42	-1.13212311683813	7.94784438707524e-10	1.81336811166271e-08
Y113G7B.14	1.27462443277255	7.99591313247402e-10	1.82230158491824e-08
EEED8.2	-1.3308351271692	8.22553231965576e-10	1.8725451805203e-08
C16C8.18	3.3747132456651	8.2425671767951e-10	1.87433593765542e-08
B0024.4	2.26567085804195	8.62408573353388e-10	1.95891316278481e-08
Y38E10A.17	2.9153914154026	8.66970406832745e-10	1.96708945914337e-08
Y41D4B.18	2.05422253674502	8.869016073236e-10	2.01008088231889e-08
BE10.3	-0.767994871677788	9.02989557849237e-10	2.04427636003455e-08
nhr-36	0.858886345037814	9.07447413458036e-10	2.05209595943835e-08
lgg-2	0.435486624035449	9.21224294792722e-10	2.08094897883399e-08
txdc-12.1	-1.44683028089122	9.29088758265801e-10	2.0963975149258e-08
T20D4.19	-1.89827858919168	9.32921988662352e-10	2.10272593321108e-08
ttr-44	-0.757955327974068	9.39768732791133e-10	2.11391488054278e-08
C15H11.1	3.29842246034173	9.40821463405158e-10	2.11391488054278e-08
ZK512.1	-1.26934017461484	9.40988378072655e-10	2.11391488054278e-08
ZC239.16	0.845249544590864	9.4219596375615e-10	2.11430429056718e-08
catp-1	0.570697714980968	9.50866317695019e-10	2.13142106717536e-08
hdl-1	1.87161333869921	9.7183806756866e-10	2.17604442664908e-08
sdz-13	-1.14145368972418	9.90506347762578e-10	2.21541808176262e-08
C50F4.6	-0.50002055745385	9.96515993067349e-10	2.22642365533069e-08
pqn-89	0.720729021772546	1.01911342049216e-09	2.27442528986039e-08
msp-40	3.07599310779475	1.02977973165365e-09	2.29572377908348e-08
atrn-1	-0.315041730788935	1.04057283823715e-09	2.31725822789565e-08
sax-1	0.343835387874453	1.07114867970500e-09	2.38275217183996e-08
cng-1	0.849401380456731	1.08576056298116e-09	2.41263078141563e-08
cyp-34A2	-1.42253364177262	1.10162580909904e-09	2.44522653804687e-08
hnd-1	-0.931519352769905	1.10571542764942e-09	2.45164213529687e-08
Y116F11A.1	-1.26282513838555	1.10943287155548e-09	2.45721952255782e-08
ZK1307.1	-0.592749764341586	1.18160942325506e-09	2.61424690904797e-08
K10D11.2	2.88076336330028	1.18991478104348e-09	2.62899902530479e-08
Y48B6A.5	2.78661751982202	1.19084923809237e-09	2.62899902530479e-08
hdl-2	3.563876716591	1.19537646777554e-09	2.63614683179454e-08
pals-19	1.17535946255359	1.21187044465895e-09	2.66964089441411e-08
fbxb-61	-1.04112496155294	1.21931673936975e-09	2.68315307889513e-08
grd-14	-1.00108108817766	1.24276149926048e-09	2.73180358380452e-08
gsp-4	3.28838293443983	1.25192365613509e-09	2.7489876801686e-08
C39E9.8	0.592582630796753	1.26477192162534e-09	2.77422021392561e-08
T22B7.3	1.37691452520035	1.28844574881129e-09	2.82311858981234e-08
F53A9.6	1.23134154859183	1.29892684596526e-09	2.84303656446121e-08
Y38F2AR.3	0.277261187828312	1.33853546773488e-09	2.92659685207531e-08
R02D5.7	1.71351801774632	1.34040553487005e-09	2.92755452450304e-08
Y39A3A.4	1.85840833778633	1.35918348409537e-09	2.96539892906742e-08
M05B5.1	3.19845214478467	1.36122394685886e-09	2.96668455710401e-08
vit-1	-0.688064485351521	1.37936345720282e-09	3.00301673648533e-08
F54D1.1	3.20890124610665	1.41950835308394e-09	3.08712864490371e-08
C38C3.3	3.16971800809885	1.42759935907241e-09	3.10142547263732e-08
msp-38	3.43831651242959	1.4518799385763e-09	3.15082607052179e-08
Y105E8A.27	2.92331896595456	1.4861732140189e-09	3.22182810330735e-08
nmad-1	0.4344987257891	1.49131899112609e-09	3.22955870080409e-08
F26B1.8	3.28770361385417	1.50299973682894e-09	3.25140990687768e-08
T06A10.107	2.65713355802116	1.50578594823898e-09	3.25399388370502e-08
pat-12	-0.509951965498855	1.50819834624595e-09	3.25576544797317e-08
haf-7	0.754944868326133	1.52109481491646e-09	3.28014148748284e-08
decr-1.3	2.80900086487258	1.55781204163561e-09	3.35577993331473e-08
C17H12.3	2.8502034757163	1.5715448588532e-09	3.38179911047747e-08
math-39	0.815632890360233	1.58509797132969e-09	3.40737726896875e-08
F36H5.13	-1.24567750811187	1.59168635789492e-09	3.41794582084516e-08
calm-1	-0.45645752207738	1.59934508140626e-09	3.43078819508794e-08
crb-1	-0.58598654654228	1.6144108363867e-09	3.45947596732214e-08
F37C12.18	2.04159612499758	1.63562183697691e-09	3.5012583469444e-08
K09F6.3	2.20337709394259	1.68287936074751e-09	3.59865091754826e-08
ttr-37	1.08266731329668	1.69068726527915e-09	3.60895425924661e-08
F32B6.4	3.38566049269243	1.69122838152828e-09	3.60895425924661e-08
H06H21.8	-0.593676195768673	1.70200604173617e-09	3.6263170242628e-08
nlp-24	-0.721915572689683	1.7029126563089e-09	3.6263170242628e-08
Y49A10A.2	-0.579824669784257	1.72955808370502e-09	3.67922538035191e-08
spch-2	2.9777933645231	1.7330377780945e-09	3.68279535317941e-08
moa-1	2.58612576493213	1.73579144505117e-09	3.68481666782772e-08
fbxb-96	-1.30500794242533	1.74179674199145e-09	3.69011814017525e-08
gipc-2	3.11246209587474	1.74189894108943e-09	3.69011814017525e-08
cul-6	1.25514106717105	1.76013128450034e-09	3.72488238602903e-08
rmd-6	3.57739431013662	1.80203384747959e-09	3.80961509245349e-08
Y51H7C.9	2.35529421613431	1.82274768141045e-09	3.84942467469771e-08
C24A11.1	2.02152199516533	1.82535309365225e-09	3.85094874030267e-08
msp-78	3.21645109571215	1.87758078652619e-09	3.95704989886133e-08
cpg-20	-2.47257611124991	1.8838033457723e-09	3.96607536535768e-08
B0563.8	-1.05028650338228	1.90005901738482e-09	3.99618379551418e-08
Y60A3A.8	0.342194560748507	1.9256770366897e-09	4.04293636648873e-08
hprt-1	-0.469497317174393	1.9262437122536e-09	4.04293636648873e-08
tag-164	2.11226413391442	1.94284937433286e-09	4.07360715481914e-08
fbxb-18	-1.51964469629288	1.9692686195678e-09	4.12477032682628e-08
ZK945.7	3.07236075377265	1.98766461428245e-09	4.15904070724422e-08
snt-5	0.529489646945255	1.99938544918832e-09	4.17928800999559e-08
ipmk-1	0.593971940907185	2.00243640059193e-09	4.18138992209405e-08
B0273.1	2.20988107672847	2.01417419433462e-09	4.19836432314216e-08
prk-1	0.505236548147881	2.01467270019198e-09	4.19836432314216e-08
F09B12.3	-0.942976484647355	2.02716184122886e-09	4.21903021506877e-08
eat-20	-0.447350962142087	2.02871726332368e-09	4.21903021506877e-08
gst-22	1.04249225065611	2.04074918647102e-09	4.23973939217755e-08
lys-3	2.23952090403344	2.12059774787674e-09	4.40115530556794e-08
wht-4	2.97121830594304	2.17117093550509e-09	4.49854329814338e-08
C10G11.8	3.03204952243134	2.17192302268137e-09	4.49854329814338e-08
K02E7.5	-2.03469177922881	2.20429997091295e-09	4.56098221714307e-08
spe-6	0.582081939487293	2.21289767309619e-09	4.57414227817043e-08
ZK354.2	2.14319072795611	2.21943651631027e-09	4.58302431342737e-08
C34F11.2	2.95642567181426	2.25707354508283e-09	4.65603980647108e-08
ZK1290.13	0.603976667416308	2.26598218057848e-09	4.66970501185141e-08
hmg-1.1	-0.376100094668001	2.28481342378756e-09	4.70377047557796e-08
C27D8.2	2.17201868097473	2.30340087362526e-09	4.73726600196391e-08
ipla-4	1.27595779135544	2.30843079737431e-09	4.74283927544955e-08
ZK930.4	3.14154671652605	2.31547204810515e-09	4.75252962644714e-08
F57G9.3	-1.03403935355748	2.3492961747033e-09	4.8171175225135e-08
Y38C1AA.7	3.10559878137391	2.38406489014315e-09	4.88351087667298e-08
Y38F1A.1	1.50834562290917	2.38784373352626e-09	4.88635529974748e-08
Y106G6G.4	2.61321406583567	2.39293470349092e-09	4.89187641434649e-08
sto-1	-0.921605297549297	2.46601031903535e-09	5.03234854554639e-08
Y119C1B.1	3.21622151842079	2.46657205040233e-09	5.03234854554639e-08
M03B6.1	-1.20201323798602	2.48328817822286e-09	5.05691793386237e-08
F53C3.11	-1.11165518383446	2.48356190656842e-09	5.05691793386237e-08
Y110A7A.21	0.735689294658695	2.50566757160786e-09	5.09685195685368e-08
acdh-8	3.21378050022811	2.55727990770318e-09	5.19666731144892e-08
Y54G9A.7	0.368280595114288	2.60265927348645e-09	5.2836309362347e-08
clc-1	0.74958379220589	2.62295656639025e-09	5.31955367923768e-08
hsp-16.49	5.35647320618721	2.68446686485629e-09	5.42631669357531e-08
H24K24.2	-1.0202323821173	2.6851960719729e-09	5.42631669357531e-08
ckc-1	-0.623817611794351	2.68619704374175e-09	5.42631669357531e-08
C17H12.6	1.44020351632951	2.68621655035866e-09	5.42631669357531e-08
Y37D8A.5	3.11225019220292	2.7102861032272e-09	5.4695339396124e-08
T20F5.5	0.899255680292341	2.77846445759737e-09	5.60159259434547e-08
msp-57	3.15057960436424	2.82507379403351e-09	5.68994912033763e-08
ZK1240.3	0.605921788678331	2.83748747067341e-09	5.7093264136788e-08
C08G9.1	0.709786060204165	2.85567294992918e-09	5.74026766129815e-08
sgca-1	0.520341684904613	2.90297781227603e-09	5.82443264193324e-08
F40H3.6	-0.786410755846585	2.90324162898301e-09	5.82443264193324e-08
C32D5.4	3.38571011716544	2.92913142121169e-09	5.87061114155202e-08
T27A3.5	3.1048548625064	2.93716684716096e-09	5.88095023080426e-08
K11C4.1	2.96891706225223	2.95012770604036e-09	5.90112139868719e-08
plc-2	0.508066631323976	3.00327676309826e-09	6.00156274369675e-08
F44E5.3	-2.00072759920506	3.01850771826783e-09	6.02610871919427e-08
F53B2.5	2.89738082474155	3.02396571488047e-09	6.03111523017576e-08
F25F2.1	1.81875184303017	3.05206843237451e-09	6.08123147787837e-08
C24H12.7	-1.28918608594111	3.05829502333125e-09	6.08644122919016e-08
B0395.3	-0.285445695811046	3.06063766746929e-09	6.08644122919016e-08
C04F12.7	2.75702762627315	3.07805762554782e-09	6.11513430894791e-08
zip-2	0.665043618817892	3.09648459137958e-09	6.14577033995852e-08
M176.9	2.66000511201469	3.10048479200872e-09	6.14774108661825e-08
aptf-4	-0.735327543078631	3.12384192474218e-09	6.18805237088222e-08
T16A9.5	2.97934338995864	3.17311260526652e-09	6.27956834360731e-08
F57C12.2	1.06007189829981	3.28208828511897e-09	6.48894882134304e-08
fbxa-29	1.12494504630103	3.31833699862686e-09	6.55427664376125e-08
F22E5.1	-1.34544490530422	3.33643550584024e-09	6.58366322836795e-08
aat-3	-0.469441585523812	3.3703630600741e-09	6.64419788207279e-08
cdh-4	-0.562032190674407	3.39650650642741e-09	6.68928540567395e-08
ubxn-5	2.92877608636928	3.40349365415245e-09	6.69659487698158e-08
sdc-1	-0.353409279678467	3.43523062524604e-09	6.75254035306776e-08
C36B1.6	0.825932492443972	3.44737877088774e-09	6.76991010694122e-08
ugt-60	-0.902906565343692	3.45184765941705e-09	6.77218058555304e-08
msp-77	3.0750679044653	3.49847512054403e-09	6.85707832112001e-08
T02H6.5	-1.01307484920287	3.54014296424421e-09	6.93210178333759e-08
Y77E11A.22	-2.13204522348551	3.58350753545198e-09	7.01030091361195e-08
F07E5.13	-1.2996910628452	3.63839299126891e-09	7.11086691400672e-08
msp-76	3.0473504867777	3.64380797241301e-09	7.11464817383373e-08
ugt-17	0.542319946930458	3.65864727757788e-09	7.13680594422945e-08
Y37D8A.16	0.680236769520441	3.67091985794373e-09	7.15391941429396e-08
F15A4.2	-0.605919526145962	3.74456821306836e-09	7.29049599807205e-08
R11.4	-0.800224698857266	3.75040331231789e-09	7.29490912594811e-08
ets-9	0.776173965164963	3.76713092641198e-09	7.31682558565653e-08
2023-06-01	0.688704685217762	3.77034326874798e-09	7.31682558565653e-08
21ur-3151	2.36385546539659	3.77240824110061e-09	7.31682558565653e-08
lips-10	0.964638225066402	3.78114294376523e-09	7.32186392976855e-08
ptp-5.1	3.2942194716464	3.78216910915012e-09	7.32186392976855e-08
Y54G2A.13	2.84880958393991	3.82096023858145e-09	7.38996122585814e-08
Y87G2A.16	1.62475609121191	3.83126515775993e-09	7.40288786579265e-08
ent-3	3.13080668031355	3.85404399194948e-09	7.43986981373212e-08
mab-20	-0.593110544941872	3.88781957146883e-09	7.49799014146579e-08
Y113G7C.1	3.19014908504546	4.05513536677515e-09	7.81330181931992e-08
Y57G7A.6	3.1052268872758	4.07102116906724e-09	7.83139016635337e-08
pcbd-1	-0.363876929912349	4.07218497619412e-09	7.83139016635337e-08
ech-3	0.431086194189485	4.1186820229549e-09	7.91336622135969e-08
sss-1	3.06988893068694	4.2041325828605e-09	8.06996078792651e-08
Y51H4A.1	-1.76391743473551	4.21626802906016e-09	8.08566297542936e-08
cyp-42A1	0.677831453560428	4.26052598730605e-09	8.16288029601663e-08
bath-9	-0.747418681635405	4.28001318124215e-09	8.19253833933833e-08
fbxb-46	-0.948368352071972	4.41450511136106e-09	8.44206997114632e-08
ZK938.1	3.04630466929669	4.47685432651194e-09	8.55330214924146e-08
Y54F10AR.2	0.282750144969827	4.5028205158959e-09	8.59487953374976e-08
K09F6.6	-0.760577838321604	4.67279388605625e-09	8.91100050491118e-08
gei-1	0.558605515934913	4.76292705199052e-09	9.07441917277187e-08
alg-3	2.92010025335671	4.79204409807738e-09	9.12139269059552e-08
F13E9.13	-0.773469918838012	4.81844107330339e-09	9.16310612665499e-08
Y54G2A.15	1.8438771651772	4.83325154414607e-09	9.18272874693105e-08
fbxa-99	1.63603322146984	4.87512728829855e-09	9.25368868660049e-08
K07A1.5	2.89651260748058	4.88844233095858e-09	9.27035496955345e-08
C46E10.1	3.39015541536917	4.92463783152598e-09	9.33034024002648e-08
fbxa-108	0.471899066321763	5.04954247772297e-09	9.55812934000839e-08
vet-6	-0.84670904629862	5.11640915621844e-09	9.67574027572373e-08
R03H10.6	1.19903970344225	5.12755881941097e-09	9.6878636733104e-08
R03H10.2	-1.92448366347894	5.16065049683167e-09	9.74138302001199e-08
F44F1.4	-0.701311292905458	5.2135492303885e-09	9.8321574646524e-08
slc-17.6	-0.669673548482288	5.27067770521213e-09	9.93073403941489e-08
pud-1.2	-2.0061418974752	5.29865778507792e-09	9.97425976982946e-08
T05C12.1	2.91808109530158	5.34433321693424e-09	1.00509847243594e-07
C17H12.5	2.61442182323319	5.40879244827562e-09	1.01628625018473e-07
nstp-4	0.255686477935835	5.4194556577017e-09	1.01735474757021e-07
R06C1.4	-0.58351454493694	5.43978135156716e-09	1.02023348779897e-07
msp-36	3.0261683453277	5.47041585926321e-09	1.0250386013833e-07
dhs-14	0.385741032885334	5.48087654212512e-09	1.02605823398044e-07
Y113G7B.11	-1.48233631261392	5.59730871354848e-09	1.04689645042152e-07
Y69E1A.1	3.3089369061107	5.62705995423605e-09	1.05149896384321e-07
C17G10.3	3.78380840772064	5.64780579771495e-09	1.05441181664554e-07
gst-12	0.706033554106341	5.6619595755184e-09	1.05608977739346e-07
lips-5	-0.878911027697274	5.66866590167539e-09	1.05637681885096e-07
wht-5	3.36474060762525	5.68217337779584e-09	1.05792960257086e-07
F32D8.12	0.475501727804961	5.81078829466318e-09	1.08089122027115e-07
Y39B6A.25	3.41376563816966	5.82286730943499e-09	1.08215342187981e-07
fbxc-58	2.31646915480785	5.86415018030117e-09	1.08718169878058e-07
ctl-2	0.43431133278303	5.86519274540973e-09	1.08718169878058e-07
unc-37	-0.304853770976805	5.86587787386869e-09	1.08718169878058e-07
aly-1	-0.509912177737313	5.9110331689234e-09	1.09455843362592e-07
cyn-8	-0.410688986973368	6.01000294400094e-09	1.11136941619176e-07
fbxb-4	-1.01792453483706	6.0155090603518e-09	1.11136941619176e-07
C55C3.4	3.10629462092755	6.01812817944663e-09	1.11136941619176e-07
snb-2	0.491572069655909	6.11442856201279e-09	1.12813414344068e-07
D2045.9	-0.563108158310186	6.12447251546663e-09	1.12896836459589e-07
gadr-4	-0.945167675756442	6.15926762600295e-09	1.13435953223764e-07
lect-2	-0.747896879237361	6.19771909688743e-09	1.13993773010486e-07
pitr-3	-0.833521775146406	6.20070809507707e-09	1.13993773010486e-07
F34H10.3	0.496167160450938	6.25616509027072e-09	1.14909957718243e-07
R02C2.1	-0.737873314188215	6.40554400275486e-09	1.17548057494001e-07
gipc-1	2.8717152054093	6.479312173554e-09	1.18795137904901e-07
msp-51	3.14762495355939	6.59829613330226e-09	1.20868250764425e-07
Y47D3A.1	-0.925091228871896	6.75115747809367e-09	1.23557665465236e-07
fbxb-21	-1.32496462710161	6.78305855370237e-09	1.24030470494935e-07
C25F9.11	3.83314524868925	6.81956544706678e-09	1.24586574114733e-07
pfk-1.2	2.97729653790961	6.8476385719173e-09	1.24987745826523e-07
ssq-4	2.99895429157635	6.86807445893141e-09	1.25248926105205e-07
F16B12.6	-0.31954481899062	7.00841528141119e-09	1.27694325844821e-07
cpr-4	0.800262145096193	7.03005397268654e-09	1.27974526592726e-07
C50F4.10	3.37668518381757	7.08139683795624e-09	1.2879448003411e-07
ZK637.12	2.21773066886391	7.09875527494279e-09	1.28995425853916e-07
Y57A10C.11	-1.11985747710325	7.11120356091196e-09	1.29013202935361e-07
F11A10.6	0.236345577165272	7.11235531517646e-09	1.29013202935361e-07
gln-2	3.25222281715901	7.14101675953652e-09	1.29418267389366e-07
C09D4.3	2.32717469175862	7.24564130443449e-09	1.31198091396416e-07
clec-119	1.90443775584812	7.31926734296301e-09	1.32413966630259e-07
T02C1.1	-0.93052328721124	7.40736136630053e-09	1.33889202839329e-07
nhr-62	0.729808647352497	7.47151105411508e-09	1.34929417384518e-07
linc-16	-0.910556281557295	7.59747361919738e-09	1.37083100791926e-07
C34F11.5	2.93069310013826	7.6122721122327e-09	1.37225205916697e-07
C50F2.5	3.49942291490444	7.61877457885099e-09	1.37225205916697e-07
C06B3.7	3.02241651298194	7.65319940944097e-09	1.37723904513382e-07
tab-1	-1.85287047541736	7.88397373122908e-09	1.41752044843902e-07
T28B8.4	3.55801172229725	8.06668206435752e-09	1.44909649772988e-07
F34D10.9	0.839370959769176	8.0980223175057e-09	1.45344925581009e-07
acox-1.4	-0.799652619592291	8.20296475203563e-09	1.47099305636723e-07
F25C8.1	-1.93707872721989	8.24926476518103e-09	1.47799929530759e-07
K08F8.15	1.17653767823437	8.29594309345148e-09	1.48506098650988e-07
set-19	-0.399267626618399	8.50605364336053e-09	1.52134081042187e-07
F58D2.2	1.99185650869479	8.57963469364819e-09	1.53255700809245e-07
catp-7	0.586744857566607	8.58375861794184e-09	1.53255700809245e-07
ifbp-1	-0.560417354014887	8.62959406912691e-09	1.53939608686877e-07
scd-1	-0.406971940322419	8.66671988183614e-09	1.54358547157276e-07
dct-17	1.81716490484039	8.66818041072998e-09	1.54358547157276e-07
B0252.5	2.73816848561141	8.85062025102737e-09	1.57470173883161e-07
Y71F9AL.8	0.39310020828735	8.87529350422403e-09	1.57771847919002e-07
C25D7.1	3.16909773233654	8.9089610544417e-09	1.58232746165032e-07
tts-1	1.51100346031977	9.08515570216283e-09	1.61222081613988e-07
C04C11.1	-0.970316298851235	9.10682140405238e-09	1.61466391988762e-07
irg-2	3.13269974932135	9.26810718351442e-09	1.64183635314199e-07
endu-1	0.450732085895127	9.33309753049826e-09	1.65191785987858e-07
msp-59	3.01473796384853	9.37440813851253e-09	1.65779433888937e-07
C28A5.6	0.885671875741994	9.40599359137896e-09	1.66087460244918e-07
F58F9.3	0.78346651255764	9.40807508504694e-09	1.66087460244918e-07
lam-3	-1.13710883870669	9.441038014504e-09	1.66525573883093e-07
ttr-35	-0.39305129060923	9.58977104015400e-09	1.69003180494714e-07
Y41D4B.14	-0.722831241825637	9.67161484159261e-09	1.70298727137535e-07
K05C4.3	-1.44695908406079	9.71690503558424e-09	1.70948958384207e-07
ZK265.3	3.26421226449264	9.75753993804413e-09	1.71516241576471e-07
R03H10.11	-0.986143112485617	9.78360977817429e-09	1.71826748019946e-07
B0379.2	3.08645099330025	9.81949545149067e-09	1.72308966107145e-07
aat-2	0.584672276128628	1.01304753073761e-08	1.77613470590643e-07
F10E7.1	-1.17393868079452	1.03288078560062e-08	1.80935577549559e-07
fbxb-71	-1.1967831624029	1.03934199819442e-08	1.8191154511206e-07
C45G9.9	3.01621130351528	1.04563852275399e-08	1.8285704294833e-07
R03H10.7	1.42325739608615	1.05499251862156e-08	1.84335145796414e-07
col-101	-0.581365906910156	1.06037911111551e-08	1.85118105623693e-07
maea-1	0.390710458597383	1.07834398356237e-08	1.8798440992116e-07
pud-1.1	-1.94225934273512	1.07863675995461e-08	1.8798440992116e-07
Y53F4B.39	0.322044952410759	1.0833995174721e-08	1.88653631479405e-07
fbxb-82	-0.925345948938279	1.08783646196794e-08	1.89265028017112e-07
R04B3.2	-0.576018876159724	1.08890101491478e-08	1.89289144965161e-07
ZK484.7	3.32095839268853	1.09304857546556e-08	1.89848700324915e-07
fbxa-63	1.04708942589135	1.09539332817663e-08	1.90094446586714e-07
fbxb-98	-1.19444733129106	1.10165857112846e-08	1.91019560386592e-07
ztf-16	-0.61369951597642	1.11016564145039e-08	1.9233149328958e-07
C39H7.1	3.15541401976041	1.11601287006835e-08	1.9310498750304e-07
F20D6.6	2.8001184951328	1.11651956771801e-08	1.9310498750304e-07
W09D6.4	2.94576546069373	1.11861791488646e-08	1.93304362079661e-07
Y49E10.10	2.23949096312002	1.13026219672139e-08	1.95151605469387e-07
C25A8.5	2.74084961973522	1.14342644405145e-08	1.97257947643408e-07
ZK858.8	2.0620948654467	1.16321450536619e-08	2.00502480043853e-07
btb-6	-0.489868498112899	1.16982183455976e-08	2.01471506014366e-07
T23F11.2	2.99447902774108	1.176789824062e-08	2.02500962738211e-07
C28D4.5	3.29986087521647	1.21592603140316e-08	2.0905951101745e-07
C35E7.10	2.17947584166193	1.24572804180509e-08	2.14003515618668e-07
mltn-9	0.964258762069016	1.26864167699865e-08	2.17756858126644e-07
dpy-14	-2.43447973614484	1.27781106232673e-08	2.19146741167326e-07
nkb-2	3.19210654771047	1.28332726240718e-08	2.19908291914417e-07
F49F1.5	2.04808610673723	1.30168763956737e-08	2.22855109239549e-07
F42G4.2	1.33159477689623	1.30270437578272e-08	2.22855109239549e-07
scrm-5	2.12260369878449	1.31938495243105e-08	2.25519954703577e-07
mps-2	-0.828976265190812	1.34049163912003e-08	2.28936262143114e-07
ZK180.7	1.54690900681423	1.3479968312254e-08	2.300258699561e-07
Y51B9A.9	1.21774454104072	1.37128268459042e-08	2.33804269566988e-07
F21H7.2	2.57272086026899	1.37843402467907e-08	2.34827723054285e-07
paic-1	-0.584838115762143	1.38909250987253e-08	2.36446446122599e-07
lias-1	0.262759235456564	1.42553548458443e-08	2.42447769645253e-07
T02E1.6	3.44094940683131	1.46104581973378e-08	2.4828062920048e-07
ZK688.10	2.70670369788581	1.49635217426539e-08	2.54069165269995e-07
F58D5.7	2.3104037986062	1.49773037171455e-08	2.5409213268847e-07
pgap-3	0.357820334460635	1.49940082793124e-08	2.54164603029838e-07
linc-7	-1.34166871420503	1.52526710953123e-08	2.58335008451922e-07
math-45	-1.36672961864048	1.53661345263361e-08	2.60041298114146e-07
Y39H10B.2	0.556556558490922	1.53899838564132e-08	2.60229478888878e-07
C33F10.1	2.80186583356862	1.55543496588222e-08	2.62791380227523e-07
F14F9.4	2.03339717851763	1.56876631779569e-08	2.64824854126319e-07
T13F2.9	3.22934165983949	1.57164321979634e-08	2.65091603484295e-07
Y22D7AL.15	0.567634482605849	1.5739061602948e-08	2.65254440518604e-07
Y32F6B.1	0.860845088488049	1.5867368164204e-08	2.67196546442194e-07
nhr-50	0.891648230843339	1.61266105866143e-08	2.71338518701363e-07
D2045.5	1.43900473768912	1.62003517961243e-08	2.72355091914613e-07
ZK354.8	3.00390100228299	1.62639984110624e-08	2.73200426883607e-07
best-5	1.11156797631623	1.62927812547774e-08	2.73459217726941e-07
nspe-1	-2.10954188027256	1.63748493735982e-08	2.74611194212034e-07
hrpa-2	0.307479790527	1.64764324797892e-08	2.76088286216664e-07
C24D10.2	2.79374487372076	1.65721600597743e-08	2.77316845123248e-07
Y38H8A.4	2.71452993911241	1.65768813158836e-08	2.77316845123248e-07
fbxa-4	0.881804408854968	1.66779675818496e-08	2.7877979662776e-07
K08C9.1	3.11996714360066	1.6726044038587e-08	2.79354998595453e-07
cyp-34A10	-1.54709883442788	1.68720517790112e-08	2.81563554708838e-07
fust-1	-0.448589660701093	1.69945742843767e-08	2.83376902198624e-07
C15H7.3	3.14976085682372	1.70697555311823e-08	2.84398543051312e-07
msp-113	3.04713331007739	1.72024368472542e-08	2.86273745101713e-07
F17C8.7	2.31192729961979	1.72103131991393e-08	2.86273745101713e-07
H32C10.1	2.3302533702267	1.73427624270707e-08	2.88036730733106e-07
C28D4.7	3.14290954369496	1.73563224939931e-08	2.88036730733106e-07
msd-2	3.073147533564	1.73585702814257e-08	2.88036730733106e-07
clec-151	3.12595368536383	1.73977770417285e-08	2.88453167935163e-07
T05B4.13	6.23589197844887	1.74381982021933e-08	2.88889048498733e-07
B0218.7	3.35628645754415	1.76008355646875e-08	2.91347272428264e-07
Y16B4A.2	-0.771792638251611	1.80089186369745e-08	2.97861103313649e-07
T08B6.4	2.8499369883271	1.8185835295717e-08	3.00230744300067e-07
K04H4.5	3.19569098285533	1.81877398208243e-08	3.00230744300067e-07
set-20	-0.417952849541785	1.81962477223393e-08	3.00230744300067e-07
C14C10.1	3.1796069460894	1.85070123488712e-08	3.05111978587076e-07
Y38H6C.9	1.11265900536725	1.85698903834536e-08	3.05901909032186e-07
ugt-63	1.22207732089487	1.88808826930032e-08	3.10774464487169e-07
F52G3.1	-0.33910772046348	1.90486027222068e-08	3.13164715526629e-07
grdn-1	-0.682703712303565	1.90567385469416e-08	3.13164715526629e-07
rml-4	-0.738048567836619	1.93364936384353e-08	3.17506778675127e-07
ssq-1	2.3371399603235	1.95093332526591e-08	3.19899471434306e-07
C43E11.5	2.22635693521902	1.95135078451587e-08	3.19899471434306e-07
F40F9.3	3.00557252121572	1.98388557757795e-08	3.24972538961747e-07
C06G3.3	1.21876213215794	1.99355671557382e-08	3.26295275712374e-07
F10D2.8	-1.35335049539949	2.01093627713471e-08	3.2887656250772e-07
R07E5.15	2.9686901615094	2.03928642497267e-08	3.33246461916198e-07
R07E5.6	2.64126209873136	2.05715915565446e-08	3.35870256024991e-07
F08B12.4	0.766072010496364	2.05862853201249e-08	3.35870256024991e-07
vab-2	-0.679426776985595	2.10021427794961e-08	3.42381822042455e-07
msp-33	3.01601991136822	2.10686512077505e-08	3.43192379792863e-07
Y71G12B.27	3.1462413118027	2.15619091450732e-08	3.50947538736251e-07
snf-2	2.87356907327255	2.17220237331112e-08	3.53272339837702e-07
F46F2.5	-0.900441031474491	2.19920712973245e-08	3.57379899468366e-07
C06A8.6	2.94294461158929	2.23649395963705e-08	3.63026707778737e-07
pix-1	-0.261847397620657	2.23750746857706e-08	3.63026707778737e-07
Y51H4A.13	1.32166063794479	2.24759180162351e-08	3.64135682177379e-07
W06B4.2	0.20139716760944	2.24790505751529e-08	3.64135682177379e-07
fbxb-1	-1.16865249424312	2.26916477805515e-08	3.67288484226298e-07
pei-1	3.54548416384483	2.2739786495713e-08	3.67776467825839e-07
F49B2.3	-1.79653469271651	2.30602868133152e-08	3.72665172588619e-07
F22B5.5	1.67487835224764	2.32422759791956e-08	3.75309516463425e-07
T16G1.4	1.05576997835788	2.33315319105675e-08	3.76453438711706e-07
msp-19	3.11733710327167	2.34149972574966e-08	3.77502199475554e-07
cutl-9	-1.85235088413889	2.35332548856714e-08	3.79109794820946e-07
W07A12.8	-1.24678048545888	2.3575525009255e-08	3.7949169902693e-07
Y47D3A.5	1.45120234569395	2.37511508936359e-08	3.82017921100392e-07
C09B9.4	3.17069939126964	2.38355712528058e-08	3.83074357799615e-07
gst-14	2.09401192482538	2.38711433601745e-08	3.83344684769872e-07
F26E4.5	2.30155994197558	2.45128751362007e-08	3.93341213822096e-07
zip-9	0.535282158544192	2.4801570892685e-08	3.97661579418949e-07
his-32	-0.763666190952209	2.49545173615194e-08	3.99800312242587e-07
unc-6	-0.653358847374644	2.50968118338084e-08	4.01765171745142e-07
msp-45	3.16155786518276	2.52570309468003e-08	4.04013680473739e-07
his-41	0.358877192752316	2.52795662972458e-08	4.04057993600154e-07
fbxa-87	1.7415849746986	2.54598594644102e-08	4.0662180236792e-07
vit-4	-0.521769814726699	2.55373497074725e-08	4.07541014886698e-07
sst-20	2.70393533969894	2.55648806927045e-08	4.07662134166115e-07
C47A4.3	3.32622257776906	2.5925690878067e-08	4.13093451769543e-07
Y53F4B.11	1.65892870047309	2.60300644200363e-08	4.14203694783009e-07
clec-153	3.32290316243472	2.60485397207393e-08	4.14203694783009e-07
fbxc-19	-1.06721526191909	2.60561537685736e-08	4.14203694783009e-07
T04D1.2	-0.99913009730742	2.62492380791457e-08	4.16948853187238e-07
Y43F8C.5	2.87987330006584	2.65192203360903e-08	4.20910265008302e-07
F58E6.5	3.30198366450259	2.67291700489145e-08	4.23852691854969e-07
C02F5.5	2.94180135916481	2.67460731053617e-08	4.23852691854969e-07
ugt-13	1.03486075668132	2.69193188116274e-08	4.26267726154995e-07
dod-24	0.930075002527235	2.73325988041516e-08	4.32477025815225e-07
Y54G2A.11	0.941382042723786	2.76383509021987e-08	4.36976649260363e-07
fbxb-20	-0.791207724813133	2.77292012896832e-08	4.3807423644899e-07
acdh-6	1.53435301402733	2.77540761488477e-08	4.38128632209184e-07
dsl-2	-0.693465345219884	2.78272559219685e-08	4.38944901861731e-07
ZK795.2	1.94792382173636	2.83844575035417e-08	4.47380565843003e-07
C55B7.10	3.14199322723898	2.84058100310237e-08	4.47380565843003e-07
ant-1.3	1.56128900397518	2.87102646318966e-08	4.51827513371718e-07
BE10.1	3.02562192056653	2.91897935830154e-08	4.59020730936602e-07
acdh-4	0.779877274497492	2.94391382783656e-08	4.62585936836763e-07
F42G8.8	2.33433646170601	2.94877094711694e-08	4.62993275513914e-07
cps-6	0.320784348708424	2.95944412942347e-08	4.64312481487367e-07
F26D2.10	2.93919364899219	2.97996797586855e-08	4.67173967259822e-07
msp-53	3.17105646475916	3.02012347487414e-08	4.73106392313042e-07
C04G2.9	3.16648588740858	3.05052996310446e-08	4.7750370624613e-07
metr-1	0.457973579742835	3.05338482999052e-08	4.77584897318257e-07
M88.3	0.966101376383849	3.06087746141692e-08	4.78390809967478e-07
F26A3.5	2.73203468396387	3.12159321636811e-08	4.87507487564654e-07
C08F11.10	3.35483351956053	3.12567770326897e-08	4.87772742655935e-07
C08E8.3	1.6251980203982	3.17032498702921e-08	4.94362728526607e-07
rnf-145	0.385304294619183	3.24230480795962e-08	5.05201502965842e-07
C16C4.17	-1.44016047963915	3.24779070590811e-08	5.05670871293827e-07
K01A2.4	-1.36249243093614	3.26595789619924e-08	5.08112460213098e-07
msrp-2	2.77638902662452	3.35467783151367e-08	5.21518470795696e-07
K09C8.7	2.71802867400596	3.39318529643035e-08	5.27104004672687e-07
cpb-2	2.38034783478128	3.40540777886948e-08	5.28600996381388e-07
C03C10.5	-2.28182101213886	3.43984793971259e-08	5.33541816627803e-07
C05B5.2	2.86896498375995	3.45064504474779e-08	5.34810740331911e-07
kal-1	-0.87371463048703	3.45774777520972e-08	5.35505589156154e-07
ugt-6	-0.796212583239579	3.46314381076011e-08	5.35935268155707e-07
mel-46	0.301069636943933	3.47730573083835e-08	5.37719826441213e-07
C01C10.2	-0.569272514148447	3.49113909178878e-08	5.39450918015405e-07
vit-3	-0.497680615268236	3.54093597230716e-08	5.46732281585161e-07
F42A10.7	-0.926432635754987	3.62562458127782e-08	5.5938598728349e-07
ZK1128.3	1.37517104264457	3.6316492240298e-08	5.5989294937286e-07
ilys-5	-0.455151333125148	3.65194213318949e-08	5.62243139203892e-07
hrg-10	0.620713607918763	3.65239391900782e-08	5.62243139203892e-07
K07E3.2	-0.481128511609929	3.67007129851141e-08	5.64539259258606e-07
Y34D9A.8	0.585568938865468	3.72549993880917e-08	5.72634550744931e-07
pes-2.2	-1.51269521306286	3.73663781881348e-08	5.73915003230684e-07
C24H12.3	-2.07650457331917	3.80718323082152e-08	5.84311162069702e-07
T22C1.9	2.74593028167492	3.82044151667514e-08	5.85906120970667e-07
msp-3	3.16499143128485	3.87923736341933e-08	5.94477132086817e-07
F59A6.4	2.97171540924287	3.92706074409267e-08	6.01355077089787e-07
W03D8.9	3.15842673203163	3.94631522908133e-08	6.03851214282258e-07
T10E9.4	3.02903889911379	3.95789442237308e-08	6.0517004993697e-07
msp-142	3.1630305488808	3.98173024234763e-08	6.08359576564369e-07
F21D5.9	-1.41391191776024	3.99020737156067e-08	6.09199471970237e-07
spch-1	2.94059066701515	4.01463123452914e-08	6.12421682309528e-07
C43G2.3	2.8304114100431	4.01730409419888e-08	6.12421682309528e-07
fipr-4	2.98888389217309	4.05080974157837e-08	6.17069325984252e-07
kin-14	0.678143076200536	4.06137855522484e-08	6.18218628477002e-07
fat-2	0.503237758414247	4.0933140706022e-08	6.22616216855066e-07
F59A7.7	0.826632647029386	4.09664582222532e-08	6.22659706644998e-07
M01D1.12	-1.89361216050034	4.22920276080923e-08	6.42329807126471e-07
kel-10	2.75568648055533	4.28962989839307e-08	6.51023786286931e-07
erp-44.3	-0.756347486401144	4.3371276301065e-08	6.57744066337294e-07
R148.7	3.0774984059705	4.37060538374177e-08	6.62329769161104e-07
Y106G6G.1	1.47404152914453	4.39285178187004e-08	6.65207343479909e-07
taf-7.1	-0.540937278610838	4.39610194707898e-08	6.65207343479909e-07
F13A7.1	2.98671071113297	4.40866567126309e-08	6.66615031935143e-07
K02E10.1	-0.630231628790419	4.45099202113303e-08	6.72517589711918e-07
F08B4.8	2.87487565898069	4.46311253403642e-08	6.73850882816149e-07
dpy-27	-0.463147017721969	4.50139042914373e-08	6.79128594413175e-07
Y57G11A.2	3.41480255048759	4.55512317181335e-08	6.8672848821077e-07
pmt-1	0.501926317437831	4.58441644061114e-08	6.90635411167381e-07
K09C4.5	-1.1656025908261	4.5972415253965e-08	6.92057500027104e-07
sdz-11	-1.21712144291916	4.63521864272531e-08	6.97261035417464e-07
basl-1	2.84646681030107	4.69976826797506e-08	7.0645119633981e-07
Y18H1A.11	1.59692174113674	4.70915768509555e-08	7.07342472861192e-07
ldb-1	-0.419969146759878	4.72550338790121e-08	7.09276547421911e-07
C32C4.16	-5.16433362712484	4.77563316215993e-08	7.16274899002461e-07
kin-33	-0.60316417128814	4.80096989536003e-08	7.1954712295341e-07
Y71G12A.4	0.668148487949135	4.84684296947537e-08	7.25890189194028e-07
Y106G6D.1	-0.719205322221822	4.85900795674287e-08	7.27179353292053e-07
C18H7.7	2.96060758871454	4.89341665926688e-08	7.31793099966297e-07
rnst-2	-0.529903269733187	4.89767204404298e-08	7.31894075996862e-07
F25B3.4	1.22925456522438	4.91858604315061e-08	7.34482501680994e-07
mboa-2	0.230933958367572	4.93335849977166e-08	7.36150713947678e-07
F35H10.2	1.12809531302105	5.03833639589702e-08	7.51267038229926e-07
T09A12.1	2.74288993480359	5.07276173238195e-08	7.55848892821314e-07
F23F1.6	0.765379104224651	5.09826883926338e-08	7.5909621180671e-07
msp-56	3.07598939436133	5.12384506295042e-08	7.62349087495601e-07
mcp-1	-0.353067462582172	5.14925654325102e-08	7.65572738281313e-07
msp-79	3.1921105260612	5.20027750239945e-08	7.72596460621744e-07
pcp-4	0.651754023929663	5.22465548559479e-08	7.7546965233695e-07
ZC376.8	2.64328890482168	5.22720335039043e-08	7.7546965233695e-07
C36F7.5	1.83030188953558	5.25765156610746e-08	7.79421109252609e-07
Y95B8A.4	1.09026984868594	5.27309843717262e-08	7.81144575008116e-07
sdc-2	-0.650425268099315	5.30922095032317e-08	7.85926168627492e-07
C44H9.6	0.725447419298671	5.32191271103376e-08	7.87234888217534e-07
fbxb-11	-1.0226538561261	5.37256491185084e-08	7.94152888597012e-07
nhr-126	0.772549803942386	5.39738790275364e-08	7.9724567121382e-07
C34D4.3	2.93872769992235	5.47457936779471e-08	8.08063725746045e-07
F23A7.4	-1.68915507599207	5.4885403225557e-08	8.09539897647952e-07
Y106G6A.4	2.64946642309864	5.5445571746615e-08	8.17212561799604e-07
fbxa-21	1.44388660958459	5.56052747601933e-08	8.18975959598437e-07
mpst-4	3.50944719988951	5.65123799824616e-08	8.31736921512932e-07
col-7	2.86298343864193	5.67225959016363e-08	8.34230235983561e-07
msp-81	3.03792823301184	5.81254090778884e-08	8.54247115585386e-07
T05F1.8	2.13118785606394	6.03134461405655e-08	8.85330556847409e-07
F37A4.5	2.14795299259307	6.03270295792418e-08	8.85330556847409e-07
C43H6.4	-0.453207614873463	6.06730026179693e-08	8.89769148148599e-07
M05D6.1	2.66196823519695	6.08131969940695e-08	8.91185796523127e-07
ZK354.6	3.61087496850621	6.1725665810979e-08	9.03909588949745e-07
qdpr-1	-0.429697120465186	6.27365436841746e-08	9.1745391742948e-07
K04G2.10	-0.490695463753491	6.27403305075778e-08	9.1745391742948e-07
Y47G6A.13	1.51051307874184	6.44134523503738e-08	9.41246752250672e-07
C53D6.10	3.06620209436848	6.47213897028199e-08	9.4507097835339e-07
cpt-3	-1.45022548495362	6.50086360437466e-08	9.48587827724704e-07
F56A8.8	-0.722927054337287	6.543309348568e-08	9.54100378122509e-07
ugt-46	-0.571247452871273	6.56048137212023e-08	9.55922456808653e-07
acs-18	3.24412413362688	6.5846914952633e-08	9.58766725339513e-07
M05D6.3	1.92306197500022	6.59286951947885e-08	9.59155496337655e-07
fipr-7	2.63934349527106	6.59674523235701e-08	9.59155496337655e-07
W04B5.3	0.418873913189848	6.63842976908454e-08	9.64530346619724e-07
R03E9.2	-0.835316539375229	6.65295763947206e-08	9.65954637952609e-07
M03A1.3	-0.754297433397825	6.67572972254058e-08	9.68448522064907e-07
spp-23	-0.781115281839983	6.67960874681563e-08	9.68448522064907e-07
C03C11.1	3.1760256937249	6.72106149087519e-08	9.73054931395962e-07
msd-4	2.86112616106478	6.72228514709728e-08	9.73054931395962e-07
K12C11.3	0.743684779624575	6.72565972735163e-08	9.73054931395962e-07
rcan-1	0.540322931988925	6.75133099716283e-08	9.76078214816123e-07
wht-8	2.89921943220294	6.75823101608812e-08	9.76385276762469e-07
jmjd-3.1	-0.611561547499384	6.80236028224155e-08	9.82066746114859e-07
fbxb-107	-1.15797006714846	7.02121289410487e-08	1.01294746079171e-06
Y53F4B.45	0.985972372506797	7.1573186256979e-08	1.03185518099536e-06
C36B7.6	-0.217345841738617	7.21982534949216e-08	1.04013311923656e-06
C06G4.4	1.64736000710166	7.32115820361826e-08	1.05398899406034e-06
acl-13	2.01922965530187	7.34485979856589e-08	1.0566570644763e-06
pgp-4	-0.450182954211193	7.61059428737408e-08	1.09411658942889e-06
F55G11.7	2.15009398582817	7.72566603262791e-08	1.10987906328189e-06
cwn-2	-0.887999892973472	7.88791200411737e-08	1.13239174929896e-06
fbxb-85	-0.810527056512273	7.91772308734427e-08	1.13521444623667e-06
gcy-18	0.985078625881909	7.91868023447386e-08	1.13521444623667e-06
F55C9.3	-1.26151220633162	7.9452351381766e-08	1.13813916402997e-06
clec-47	1.02124873560054	7.95021633925936e-08	1.13813916402997e-06
epi-1	-0.543623783909336	8.00870648890008e-08	1.14571019420983e-06
Y65B4BL.1	-2.05869306426742	8.03633154388714e-08	1.14885822203975e-06
F54H12.7	2.57548891966038	8.05885937268605e-08	1.151273669852e-06
T22B3.3	3.22889177548126	8.18707011352364e-08	1.16877286543829e-06
ZC374.2	-0.576685562217564	8.31298811854179e-08	1.18592055901849e-06
gadr-1	-1.06733399484002	8.36229330898576e-08	1.19212246942536e-06
K10C2.12	-1.15873020238288	8.4889941339109e-08	1.20934151274941e-06
pmp-5	0.427626106470182	8.50302823293549e-08	1.2104972574227e-06
pod-2	0.502345332166174	8.55346608538528e-08	1.21665801322757e-06
fip-5	-0.932957503713418	8.55820683373892e-08	1.21665801322757e-06
unc-84	-0.272416663263365	8.56978108798514e-08	1.21745680876776e-06
vet-2	-0.693668631959965	8.58039002250941e-08	1.21811745298722e-06
ain-1	-0.387960116835859	8.77962987086275e-08	1.24553763671095e-06
Y71G12B.22	3.09784543782331	8.82605260081687e-08	1.25068319457547e-06
T06C10.3	2.79211728327719	8.82813603567185e-08	1.25068319457547e-06
ZK1307.4	2.82881156029489	9.12993621976678e-08	1.29254353283028e-06
mfsd-11	-0.555812189017224	9.13705894180928e-08	1.29265671935922e-06
B0546.3	0.368807253932049	9.18176522952206e-08	1.29808317141853e-06
fipr-6	3.03163336206043	9.37877808942571e-08	1.32501976836303e-06
spe-11	3.10864293927303	9.444084023381e-08	1.3333246525551e-06
aat-6	-0.740163177854216	9.58527766573094e-08	1.35232457778149e-06
ZK546.4	1.72819099318381	9.59666801774106e-08	1.35299782266676e-06
alh-10	-0.601220108566262	9.61994524674459e-08	1.35534487029083e-06
F40H6.1	2.9376053979779	9.72137672717815e-08	1.36869217929547e-06
ugt-66	2.06682896291223	9.90174472824577e-08	1.39312709896441e-06
gst-34	1.90196073454383	9.94621130254766e-08	1.39842089173302e-06
ssp-16	2.92620341088614	9.95671072546044e-08	1.39893496467758e-06
F53H8.3	-0.484174005466191	1.00233991024896e-07	1.40733755392991e-06
T22B7.4	-0.668001308755288	1.01407241586365e-07	1.42283338349352e-06
nspd-4	2.64481162455941	1.01596094366091e-07	1.42450545756242e-06
Y59E9AL.3	2.95150238326781	1.02084826760618e-07	1.43037704829836e-06
dot-1.4	-0.704596353513942	1.02165217903484e-07	1.43052297917871e-06
hmg-6	-2.47739020885514	1.02324024172088e-07	1.4317659316564e-06
grl-22	-0.847760188502417	1.03091436254141e-07	1.44151725810082e-06
fox-1	-0.42414122556262	1.03700006685342e-07	1.44903570517324e-06
F38H4.6	3.76886611886802	1.03838558078999e-07	1.449980630334e-06
B0025.5	2.74920083544485	1.04101957746167e-07	1.45266643153918e-06
C18H7.4	3.25312079492143	1.04277128535148e-07	1.45411823918419e-06
F36H5.10	-1.54795737308969	1.05646971882933e-07	1.47221611874765e-06
scrm-6	3.36367198595124	1.064584229732e-07	1.48251331119968e-06
F14H3.12	0.55232665388115	1.07512951648141e-07	1.49617921752413e-06
unc-64	0.436149346916117	1.08179352040764e-07	1.50439444576736e-06
F53B6.7	1.27071100015132	1.08250463714904e-07	1.50439444576736e-06
C02B10.6	4.50207442217671	1.09108215573734e-07	1.51528481723767e-06
ttbk-3	2.49503972687598	1.09272011164239e-07	1.51652934435203e-06
E02C12.6	-1.25295767757966	1.10783601950198e-07	1.53646484034457e-06
C36H8.1	3.21318516306803	1.11080302547956e-07	1.53953533897483e-06
Y47D3A.13	2.18123331204997	1.11550942356087e-07	1.54501078223949e-06
lin-66	-0.303914643511144	1.12084846438795e-07	1.55135444532721e-06
ZK1055.7	0.544587603822985	1.12237172097854e-07	1.55241171122897e-06
21ur-199	2.36850211603166	1.1324954743318e-07	1.56435817271611e-06
hsp-16.11	2.93719793866338	1.13253930226476e-07	1.56435817271611e-06
F23A7.8	-1.69480637147441	1.13907627800346e-07	1.57232520940072e-06
T04B2.3	-0.931840286938417	1.14219315860161e-07	1.57556374772555e-06
ZK418.7	0.689214924655902	1.16130952803232e-07	1.60085304663282e-06
pha-4	-0.793189315120108	1.17066436203951e-07	1.61266115587424e-06
acs-21	0.498207081146254	1.17459485638843e-07	1.61698603697971e-06
htas-1	3.17449297196743	1.18597422432077e-07	1.63155256176242e-06
gst-26	-0.547395130780833	1.19171816236911e-07	1.63835201031014e-06
F56F3.4	1.81670604269673	1.19895084505447e-07	1.64718764283929e-06
oac-14	1.91245264707821	1.20793637563192e-07	1.65841795346161e-06
nep-13	2.83552387169657	1.21459025108321e-07	1.66643412771102e-06
K10D2.8	1.269198450465	1.23625304133233e-07	1.69501817062085e-06
msp-55	2.9877992547015	1.23741958196586e-07	1.69548046341341e-06
F55B11.4	0.427038525581635	1.25413791229361e-07	1.71723652652501e-06
str-179	-1.35991959834521	1.27109346017311e-07	1.73893904634951e-06
Y51H7C.13	1.74116992005107	1.27168902523726e-07	1.73893904634951e-06
C27D6.11	2.80571748046362	1.27422627587537e-07	1.7412438340722e-06
rml-5	-0.47878766094866	1.282251470806e-07	1.75103986758096e-06
Y43B11AL.5	-1.0909691551103	1.28331393289035e-07	1.75132087650718e-06
T28F3.5	0.757570232430259	1.28792179991229e-07	1.75643664813922e-06
W04H10.6	-2.06876112402291	1.29390039612655e-07	1.76270269177025e-06
ssq-3	2.99834705178913	1.29424093349662e-07	1.76270269177025e-06
crn-2	0.371495750729862	1.29638811286972e-07	1.76445154403433e-06
abt-1	1.81419436283077	1.30084031388197e-07	1.76933323597399e-06
Y116A8C.38	2.69975901348599	1.31449374056365e-07	1.78671512887916e-06
nhr-101	0.378606050769552	1.32587403939893e-07	1.80098624501211e-06
W03F11.4	2.95610130842234	1.34399434110346e-07	1.82438753752842e-06
F33D11.7	3.10121350519521	1.36413327809467e-07	1.85049612502251e-06
gadr-2	-0.732349149004435	1.37141523275176e-07	1.85914068986368e-06
fbxa-54	0.815300085346736	1.37696797904572e-07	1.86543117267274e-06
nhr-177	0.602302334347055	1.3970641358719e-07	1.89140279004167e-06
F54C8.7	0.188872761284219	1.39957156919591e-07	1.89354345394255e-06
F41C3.8	0.552496216835735	1.40166007934167e-07	1.89511488108346e-06
B0554.5	1.055121769212	1.40311846375672e-07	1.89583283242423e-06
nspd-1	2.65796273383625	1.41327644448337e-07	1.90755813681956e-06
T27E4.7	0.598314716530616	1.41366266070618e-07	1.90755813681956e-06
col-95	-0.745918119280665	1.41498780587368e-07	1.90808678861976e-06
ncam-1	-0.770850611798845	1.42203223475451e-07	1.9163220154968e-06
F07A11.5	-0.495302984715956	1.42474359943289e-07	1.91871102787922e-06
T22C1.8	2.97879057568685	1.42717156663237e-07	1.92071549286804e-06
B0365.9	-0.8533284685749	1.46960603498372e-07	1.97652343244554e-06
Y43F8A.2	3.1608682771168	1.47665507993447e-07	1.98469821164368e-06
mrpl-9	0.327191064369462	1.513213054436e-07	2.03249766569219e-06
F13E9.5	3.04746427714539	1.53289745873554e-07	2.05758521004141e-06
C35E7.6	-0.811627185811917	1.55275528506522e-07	2.08287246014358e-06
cblc-1	0.215957153199536	1.56435762413239e-07	2.09644546413159e-06
AH6.3	3.41624569013224	1.56492480470812e-07	2.09644546413159e-06
R119.3	0.372575393475766	1.56844569557814e-07	2.09978620528512e-06
mboa-3	-0.546935653552719	1.57647142187112e-07	2.10914956003346e-06
K08D9.9	-1.21711942043933	1.59247299120347e-07	2.12916451008323e-06
Y39B6A.27	0.72102351704904	1.61422229311682e-07	2.15683309399916e-06
C18B2.4	0.367426127705532	1.63086900954888e-07	2.17765219870723e-06
F53B2.8	2.14166328563995	1.6514927424349e-07	2.20375105310683e-06
F11G11.4	2.353959597219	1.6539941122279e-07	2.20564916087899e-06
msp-50	2.89037765983498	1.65775040652613e-07	2.20921718126556e-06
T21G5.1	3.00730395852004	1.67666117154599e-07	2.23296314852864e-06
ttbk-2	3.52301565595399	1.67928183737641e-07	2.23499730478424e-06
rcs-1	0.532179188311967	1.68367789669086e-07	2.23939019141518e-06
ZK596.2	2.46306237290922	1.68886876252976e-07	2.24483381745096e-06
F29B9.7	2.82964837811803	1.69553381131443e-07	2.25222857080578e-06
fbxc-57	-0.688114106954057	1.70145925547167e-07	2.25853454095776e-06
slc-17.7	-0.399515754661928	1.70249069491558e-07	2.25853454095776e-06
ZK673.2	0.326967402031653	1.71102234392664e-07	2.26838065998005e-06
ptp-5.2	2.57202621107017	1.71400640691956e-07	2.27086409440419e-06
F34D6.1	-0.721755023961217	1.72743159409798e-07	2.28716865791094e-06
hlh-3	-0.606929856619517	1.77018653863634e-07	2.34226041484418e-06
C33A12.3	0.342821317429769	1.78715170523118e-07	2.36317867464689e-06
ttbk-5	2.23293515700168	1.79482939837354e-07	2.3717968578507e-06
scb-1	0.298917954462466	1.80528567313109e-07	2.38407332143532e-06
Y55F3BR.11	0.713130800737934	1.80806467868475e-07	2.38620182223062e-06
dhrs-4	-0.38656711103473	1.8132604467921e-07	2.39151505250134e-06
lact-6	-1.70276561442983	1.83157942786869e-07	2.41411851991744e-06
irld-4	3.66727217196933	1.83623981001333e-07	2.41870170335712e-06
fil-1	-1.07689911838865	1.85627334907105e-07	2.44351552318478e-06
F31E8.5	3.05378361278553	1.86236224451251e-07	2.44995311226314e-06
ZK856.18	2.42016028844161	1.88058327048116e-07	2.4723320770705e-06
noah-2	-1.78032665534998	1.91347534567411e-07	2.513957358073e-06
klp-17	1.97961243243281	1.92616960637186e-07	2.52900997193705e-06
C32E8.4	2.12780765970043	1.93328555668861e-07	2.53672378917749e-06
C34D4.2	2.89850814158082	1.93604723105303e-07	2.53871799515183e-06
T05F1.9	1.52344058486891	1.95200403166687e-07	2.55706069572065e-06
gsp-3	3.04977742350343	1.95253717459274e-07	2.55706069572065e-06
lam-2	-0.542034689804466	1.95626836575509e-07	2.56030692708907e-06
tap-1	-0.303536573541362	1.99042870397596e-07	2.603348304247e-06
R11E3.1	1.59509788228515	2.01822277945242e-07	2.63801331715766e-06
fbxa-55	0.430998624300383	2.03178551074438e-07	2.65404416588801e-06
ant-1.4	2.56479128479582	2.10288241545905e-07	2.74516125282436e-06
F58A6.9	3.01615694397938	2.10961264770779e-07	2.75218962074604e-06
B0205.10	3.05488268740464	2.12229112756251e-07	2.76534199936777e-06
Y38H8A.3	2.75224420594248	2.12239964633764e-07	2.76534199936777e-06
H05L14.1	3.2540884838237	2.12533468415845e-07	2.76740235339179e-06
amx-1	-0.29875440305817	2.14281212401642e-07	2.78838372064084e-06
T21D12.14	1.29620161153104	2.15801822709337e-07	2.8063846448136e-06
B0348.2	1.87581286583922	2.16956743542782e-07	2.81961011331538e-06
F01D5.3	-0.946043764359475	2.23919542226443e-07	2.90825108115322e-06
F09C12.8	3.22607234725367	2.25217743979125e-07	2.9225409275947e-06
mrps-5	0.306936629216228	2.25305703756262e-07	2.9225409275947e-06
tbc-13	-0.263109953720829	2.25650097351119e-07	2.92372613497998e-06
Y54E2A.7	2.18218367921636	2.25683111138209e-07	2.92372613497998e-06
F47G6.3	3.08043186309265	2.26380566487453e-07	2.93090431963458e-06
oac-9	2.42040161469012	2.26896252280246e-07	2.93414058497051e-06
F35E12.13	5.6602574085158	2.26917588653249e-07	2.93414058497051e-06
ptr-1	-0.898185789263898	2.30913486245059e-07	2.98355367823216e-06
anmt-3	0.875670716343671	2.31030938347675e-07	2.98355367823216e-06
skr-9	-0.755111945903664	2.31181602639841e-07	2.98361458507971e-06
Y48G1A.1	0.343345923007807	2.34384000376906e-07	3.02303603766883e-06
Y70C5A.3	0.969450967371164	2.38028105375043e-07	3.06810123466709e-06
tps-2	0.657520733197852	2.39510010226814e-07	3.08525717647559e-06
msp-152	2.95646035945252	2.41881889415901e-07	3.11384852980432e-06
C35E7.3	-0.696093032046356	2.43376612417643e-07	3.1311189978942e-06
msp-65	3.23120410176249	2.43892845658101e-07	3.13578707156513e-06
C35E7.9	1.67498629671156	2.44380315009659e-07	3.14007968557037e-06
fshr-1	0.551310063478132	2.4527786344356e-07	3.14963276531199e-06
Y73F8A.20	3.57959872040993	2.46620017585899e-07	3.16487948493944e-06
F44G3.7	3.01891097498409	2.47256049332247e-07	3.17105107685014e-06
Y71F9AL.2	1.40882318405286	2.48247899189602e-07	3.18177542516177e-06
F54H5.3	2.07696171600658	2.49747398295202e-07	3.19898876149675e-06
H08M01.1	3.2079661096615	2.54149066015381e-07	3.25333084317622e-06
sorf-1	-0.299381031250599	2.54564739918795e-07	3.25661262713387e-06
fos-1	0.548525638123399	2.63286657324903e-07	3.36608451262851e-06
Y39B6A.30	2.69851485487633	2.64367722189303e-07	3.37779334044745e-06
K05B2.4	1.19060806902143	2.66612875103274e-07	3.4043516587984e-06
F14F7.4	2.8942943128458	2.68536141966063e-07	3.426769257311e-06
obr-2	0.405442426089904	2.70095095973066e-07	3.44451281782745e-06
cdk-4	-0.307538327726266	2.70615903332374e-07	3.44900306223424e-06
F36A2.12	2.14186846880351	2.74596804179774e-07	3.49562601734681e-06
F52B11.5	0.654527170790916	2.74616024255685e-07	3.49562601734681e-06
clec-25	1.84847358638324	2.7847231032789e-07	3.54250743001435e-06
C04G2.3	3.084843421631	2.79088246390978e-07	3.54813496329028e-06
nhr-96	0.702000776446269	2.80984724260888e-07	3.57002530644209e-06
dpy-18	-0.419626497837813	2.83446744330531e-07	3.59851072659852e-06
T25B9.4	3.66036738335174	2.83665846904894e-07	3.59851072659852e-06
M79.2	-0.455008050164595	2.83754795836071e-07	3.59851072659852e-06
B0207.1	3.66693895051622	2.83985149308979e-07	3.59919926058491e-06
math-37	-1.10453818788693	2.87136177701865e-07	3.63688034743446e-06
ssp-34	2.84832397953887	2.89546627855868e-07	3.66514037972601e-06
fbxb-103	-0.717600678709499	2.91359093637714e-07	3.68580071239838e-06
R105.1	2.77547525079234	2.91587085160709e-07	3.68640369940654e-06
F43G6.8	0.618370517079177	2.92140540519298e-07	3.69111809013351e-06
F35E2.9	1.82683313527182	2.92717795249489e-07	3.69360010036619e-06
fbxc-22	-0.899563089967752	2.92751732903857e-07	3.69360010036619e-06
C56A3.6	0.263720003684449	2.9287901788845e-07	3.69360010036619e-06
K05F6.4	-0.730384398338085	2.9396096056604e-07	3.70495925823153e-06
Y75B8A.28	1.14420753134718	2.94632517667407e-07	3.71113527952852e-06
ZK84.2	1.85195518235272	2.97321249561569e-07	3.74040682457065e-06
nuaf-1	0.336913464895246	2.97322364130867e-07	3.74040682457065e-06
msra-1	1.06349527147124	3.00835587081914e-07	3.78227669539703e-06
W03D8.5	3.08974537578454	3.01322864508036e-07	3.78607456615721e-06
fbxb-62	-1.12653063030708	3.04276470557891e-07	3.82058247400044e-06
C34C12.7	0.670742624093542	3.04443029405993e-07	3.82058247400044e-06
B0228.6	-0.79759989745166	3.13230565443127e-07	3.92844935543181e-06
ZK507.1	1.20508843177368	3.1449590139934e-07	3.94190049804213e-06
msp-64	3.00658052490944	3.14736277980151e-07	3.94249615854671e-06
F14B4.1	-0.771748678877039	3.15265252781508e-07	3.9467039575091e-06
R08A2.1	3.09242271270081	3.19262687239992e-07	3.99430056012678e-06
F54H5.2	2.7697889741422	3.27923659992037e-07	4.10014885701358e-06
F38B6.4	-0.602234161520236	3.30479881487452e-07	4.12958448487041e-06
unc-97	-0.427407456524433	3.32319975072878e-07	4.1500410814996e-06
Y51B9A.5	3.2094573614588	3.32888007810759e-07	4.15459679101059e-06
srp-8	0.876686690242548	3.33227018099942e-07	4.15629037890001e-06
sta-1	0.536536216388724	3.37535623848362e-07	4.20746387703174e-06
Y57G11C.22	0.556285217921136	3.41325993097264e-07	4.2521189987126e-06
F59A1.15	3.57190848482159	3.45252857655823e-07	4.29841910417661e-06
spe-46	1.85439278891368	3.49680468785964e-07	4.35089338003132e-06
cysl-3	0.455855669531659	3.49912071344359e-07	4.35112680930215e-06
Y47G6A.26	2.96216264268739	3.5039304982444e-07	4.35445903803102e-06
Y119D3B.21	-0.650397078335489	3.51909562641679e-07	4.37064835302786e-06
T28H11.8	0.795282022987319	3.58300250486965e-07	4.44731755962661e-06
T28F4.3	1.88206323971857	3.60698483720141e-07	4.47436838755513e-06
Y7A5A.1	-0.401545633768034	3.61787522276399e-07	4.48515604481287e-06
Y44A6D.5	2.5467560512204	3.70511898032301e-07	4.59053014028747e-06
F32B4.2	2.54192560647752	3.75944845108119e-07	4.655021483068e-06
peel-1	3.55112643229006	3.7880773842246e-07	4.6876311117254e-06
Y37E11AL.2	1.45717941461418	3.7956603861207e-07	4.6941733377777e-06
ncap-1	0.257225124061759	3.79817067785976e-07	4.69443791822775e-06
Y43F8B.14	1.19544614003585	3.81530039717723e-07	4.71276048456158e-06
T01D1.4	0.338975479056372	3.8265572640664e-07	4.72381099935443e-06
fbxb-50	-0.988118182357171	3.83483742144008e-07	4.73117570347011e-06
dsh-1	-0.193863240363506	3.84364810098168e-07	4.73918565309821e-06
clp-8	2.71951902632636	3.85884101493808e-07	4.75293698061696e-06
cyp-13A5	1.35124819034092	3.85945085742022e-07	4.75293698061696e-06
tax-6	0.323769084015983	3.86342593886043e-07	4.75496787887561e-06
kin-26	3.28586356362699	3.9032421189261e-07	4.80108174712433e-06
F55H12.5	2.07469961545469	3.9445293686951e-07	4.84894851979759e-06
T01D3.6	0.516353770516704	3.9657146854753e-07	4.87206161749829e-06
mpz-6	2.85081201350308	3.98403018694288e-07	4.89162337007047e-06
ptr-23	-0.425629175687251	4.01152659883184e-07	4.92242726650175e-06
ctl-1	0.619849352274035	4.02999193364343e-07	4.94130285379015e-06
mrpl-22	0.31352811436864	4.0317434623695e-07	4.94130285379015e-06
C49C8.1	3.06960762557868	4.04840916755493e-07	4.95668030889941e-06
F23C8.8	0.766877757761369	4.04913961544882e-07	4.95668030889941e-06
F35E12.10	0.488887891910344	4.06010015951795e-07	4.96712313351439e-06
Y46G5A.22	3.08167900578953	4.07088211087003e-07	4.97733510720789e-06
W10D9.1	-1.8763908832819	4.13616909226701e-07	5.05413656624115e-06
F36H12.5	2.97620189178523	4.14352348181055e-07	5.06009859848585e-06
F55D12.6	3.26581439027317	4.14632994962705e-07	5.06050287523736e-06
F25H5.7	1.72719133057681	4.21004896416695e-07	5.13520471208025e-06
nhr-90	0.539629706619582	4.21352992182345e-07	5.13638593869033e-06
ugt-53	-0.857043927165315	4.25016751465906e-07	5.17796033981973e-06
ZK892.5	2.56889945873792	4.25757939895995e-07	5.18390087271818e-06
cyp-14A5	0.62180417445025	4.2709059674672e-07	5.197031588865e-06
H27M09.5	2.30394032672549	4.28778799998764e-07	5.21447055822411e-06
F46A9.2	3.64015388161893	4.31357555154461e-07	5.24271254460324e-06
Y59E9AL.2	2.88938224682154	4.3422347979334e-07	5.274409148791e-06
fbxb-25	-1.12538023153324	4.38338992648502e-07	5.32041393683739e-06
T25B9.1	-0.702291289948629	4.38531403589053e-07	5.32041393683739e-06
C03B8.3	1.48914434356028	4.420600668365e-07	5.36004385903829e-06
msp-49	2.95910710628176	4.45762761866291e-07	5.40173570885156e-06
ssq-2	2.78755974218657	4.4662834105517e-07	5.40901846930737e-06
B0207.11	4.14202138597474	4.48727828719678e-07	5.43122735495345e-06
ZK938.11	-0.784440221106189	4.49298358815156e-07	5.43491499956108e-06
D1005.t1	-1.45018778123392	4.55931103273421e-07	5.51188618818365e-06
W08F4.13	-1.24874676565089	4.61347350705189e-07	5.57406849318332e-06
W01B11.6	0.749711607582052	4.68339675592684e-07	5.65520849860676e-06
msd-1	3.25268373730898	4.70461470495907e-07	5.67747570327498e-06
comp-1	3.13689600790987	4.70771266754192e-07	5.67786254056398e-06
nhr-132	0.570592841492233	4.72714537254036e-07	5.69793825771477e-06
M28.9	3.20230212619037	4.76371962946872e-07	5.73863997555858e-06
ptp-5.3	2.61946474277574	4.80211433176157e-07	5.78090606303935e-06
hid-1	-0.332709525087052	4.80446089179859e-07	5.78090606303935e-06
hil-1	0.586730190975591	4.89609265761175e-07	5.88769542350335e-06
col-78	3.60427404970776	4.91377501821464e-07	5.90548516739341e-06
C15H9.4	-0.236902912232563	4.91822461023212e-07	5.90735991227822e-06
ugt-57	-1.81262272717942	4.97791148823518e-07	5.97553990334655e-06
nadk-1	0.534583329725419	4.99721416483345e-07	5.99338480502039e-06
grd-4	-0.873219367618756	4.99864065575491e-07	5.99338480502039e-06
cnc-3	-0.66123281203132	5.00677862990949e-07	5.99962341918169e-06
Y53C12B.7	-0.74755951729101	5.03634067258167e-07	6.03151214818905e-06
igdb-1	-1.64996828118347	5.04030221038655e-07	6.03272237042929e-06
cdf-2	0.647943909699683	5.08946950146789e-07	6.0880061450268e-06
Y46G5A.8	-0.41185833686979	5.09302861588702e-07	6.0887008183964e-06
K08H2.4	-0.596638202424759	5.11455600012018e-07	6.11086313912664e-06
F58H1.5	-0.759527357121283	5.12135316832048e-07	6.11541021144717e-06
Y69A2AR.8	2.99615658662061	5.15053177312823e-07	6.14666205709634e-06
srj-9	-1.62553588205613	5.15425899150759e-07	6.1475213864288e-06
Y106G6H.1	-0.490692044832345	5.17603040737801e-07	6.16988860746523e-06
abhd-3.2	-0.735479743840506	5.18097781943213e-07	6.17180617996422e-06
H06I04.5	3.02577097103043	5.18367715648318e-07	6.17180617996422e-06
scrm-7	2.67739353828113	5.19351489686333e-07	6.17991996720471e-06
F21D9.2	1.78002102727024	5.20551600727832e-07	6.19059707602041e-06
F36D3.16	2.99914787672987	5.24218143049939e-07	6.23057645254065e-06
fbxb-70	-1.5755950458015	5.29878047480923e-07	6.29418763779925e-06
haf-2	0.357239787259228	5.30669654336819e-07	6.29993016469662e-06
C37C3.2	0.190954560429348	5.3489419771777e-07	6.34639703072802e-06
F11A5.9	0.606753673901006	5.47226600809809e-07	6.48895208837293e-06
rnh-1.1	3.36963958468203	5.49366082986074e-07	6.51054541129525e-06
sul-1	-0.643015474200659	5.52550476190324e-07	6.54448979418238e-06
F22E5.6	2.17700072772137	5.55579180599556e-07	6.57655193340864e-06
F25E2.3	0.582943046849918	5.70895449623762e-07	6.75394425732556e-06
B0379.7	2.92034861757131	5.73153623525404e-07	6.77425486552638e-06
ceh-10	-1.10048189683013	5.73275004517959e-07	6.77425486552638e-06
K10B3.1	-0.593083223209564	5.85229797816588e-07	6.9115267225676e-06
tag-52	-0.26715189957882	5.88076151733668e-07	6.9411320842329e-06
D1065.3	2.56593412827873	5.90501111202573e-07	6.96573238102377e-06
R193.2	-1.13777448592999	5.98463961069029e-07	7.05559328496779e-06
nlp-4	1.67470976210392	6.0036727296993e-07	7.07103971768486e-06
C43D7.8	-1.40308219913629	6.00465927207402e-07	7.07103971768486e-06
C08E8.4	1.71458851824558	6.02709848131986e-07	7.09337790751998e-06
T08G3.4	3.42125169889439	6.04629945162346e-07	7.11188145509427e-06
F37C4.6	-0.445237989385612	6.0687601373753e-07	7.13419571525953e-06
mpz-4	2.59156673292829	6.11222368515696e-07	7.18116027561286e-06
ssp-31	2.72967299892779	6.12837642086415e-07	7.19600224995553e-06
pigk-1	0.209928031136599	6.23450916716202e-07	7.31642198072866e-06
pck-3	2.72564227451112	6.39545754138628e-07	7.50099475149511e-06
cutl-28	-1.91427439882695	6.40702003880778e-07	7.51024717049011e-06
daf-16	0.290744813787523	6.4244006205632e-07	7.52456130163417e-06
T23F4.2	0.687273318087199	6.43204528253637e-07	7.52456130163417e-06
slc-46A	-0.331867941268208	6.43256196344846e-07	7.52456130163417e-06
C28G1.6	0.645004889576904	6.4339544857685e-07	7.52456130163417e-06
fbxa-6	0.822711130966816	6.45624279486731e-07	7.54631054633919e-06
pei-2	0.774736569289254	6.46173071755552e-07	7.54840920337071e-06
R07E3.6	-1.29677824915984	6.47414497901738e-07	7.55859199349242e-06
erp-44.2	-0.268280269989041	6.53399210517062e-07	7.62137332618244e-06
M01A8.1	1.35181946837592	6.5353751605918e-07	7.62137332618244e-06
Y43F8B.24	0.814197959675111	6.5585522785585e-07	7.64404129022642e-06
dct-9	3.21433024070617	6.57806097997523e-07	7.66241029137513e-06
F41G3.5	3.02745734112747	6.59689925516458e-07	7.67997787433539e-06
F40G12.10	2.83387968530396	6.62543956552683e-07	7.70493536385759e-06
nspe-3	4.77364561024221	6.62753979533618e-07	7.70493536385759e-06
C05C12.1	2.85214275936905	6.62964403709118e-07	7.70493536385759e-06
F26F12.8	-0.750955083440772	6.68108014044356e-07	7.76030234722089e-06
F40F12.3	2.98220777126432	6.76158435430146e-07	7.84935087762548e-06
F13H6.5	0.982393547740418	6.76709646518141e-07	7.8512913188254e-06
gst-35	0.907988902041948	6.79846588408343e-07	7.88321259604751e-06
B0416.7	0.970426612549535	6.88351259307482e-07	7.97730430500162e-06
tsp-17	-1.47719628047132	6.90503919627225e-07	7.99771763679283e-06
ZC412.10	0.747426881697543	6.93051716004219e-07	8.02268189709754e-06
R06B10.1	2.08894738874759	6.96962949914051e-07	8.06339195534405e-06
R03D7.8	3.36561409259395	6.99388122561453e-07	8.08543209833388e-06
trip-4	0.400531902831124	6.99912784402134e-07	8.08543209833388e-06
mmaa-1	0.298490088411729	7.00054532801006e-07	8.08543209833388e-06
Y39B6A.21	-1.17191198645032	7.01154439149286e-07	8.09356307144487e-06
eppl-1	-0.560376939740865	7.0257640733183e-07	8.10540039225994e-06
ZC239.14	1.32032252584407	7.03828709262294e-07	8.11526807865148e-06
frk-1	2.38938086302067	7.08509558753939e-07	8.16463410913572e-06
C45B2.2	1.53661165669626	7.17665363802611e-07	8.26548339843199e-06
tep-1	0.528294087781843	7.18920915151744e-07	8.27528168268418e-06
scl-23	3.47131844968582	7.248053683983e-07	8.33832084758945e-06
C26F1.1	-1.14512281318146	7.26449789990168e-07	8.35253827714792e-06
ZK616.61	3.01302013150931	7.46373947717441e-07	8.57679742169064e-06
C09B9.2	3.12498827045086	7.47718071737173e-07	8.5874160340017e-06
ugt-43	1.17365441145521	7.48465170428421e-07	8.58971392626164e-06
ncs-2	0.382100650891902	7.48758509837022e-07	8.58971392626164e-06
F42A9.7	3.11572794882901	7.49383882709759e-07	8.59206658117532e-06
cut-3	-2.92845542480144	7.61216897887652e-07	8.72284587641103e-06
E02H9.7	-0.467146864329771	7.62437110472281e-07	8.73193380917918e-06
adpr-1	0.326801800558914	7.6838227666847e-07	8.7914643488728e-06
F36H1.3	3.23066383648393	7.6849517152256e-07	8.7914643488728e-06
C42D4.1	0.563595075421988	7.73004875130467e-07	8.83810887152804e-06
mnm-2	-0.897909823411493	7.73931199001312e-07	8.8437537737193e-06
R13H9.5	3.05390448602249	7.76326254842537e-07	8.86616627248379e-06
ZK945.6	3.21070352628793	7.77117006566244e-07	8.87024174496579e-06
fbxa-76	0.459989070854303	7.79171465186909e-07	8.88872894130356e-06
rop-1	0.492253814435034	7.80916928820502e-07	8.90367249072924e-06
R11E3.2	-0.696008961012071	7.85938675421757e-07	8.95593330080656e-06
fbxa-175	0.855262287768735	7.89822073107632e-07	8.99517138748708e-06
nhr-134	0.618079625202706	7.91239453800594e-07	9.00629629957992e-06
C14A6.13	2.78218248044323	7.93767323260708e-07	9.03004195293192e-06
F59A7.2	0.883039972689833	7.9530851138289e-07	9.03947833460001e-06
Y53G8AR.8	0.233146572711171	7.95481168319005e-07	9.03947833460001e-06
ent-7	0.441738697589663	7.97971246542061e-07	9.05876308906154e-06
F31D5.7	-1.14853953152114	7.98064487765975e-07	9.05876308906154e-06
W07E6.5	0.390946628618809	7.9878450130804e-07	9.06190430645963e-06
nova-1	-0.225315011097218	8.05696328874192e-07	9.1341448069733e-06
mop-25.1	0.24379189954029	8.06325830363444e-07	9.1341448069733e-06
lron-11	-0.605345329094757	8.06492754321127e-07	9.1341448069733e-06
C01A2.4	0.288693615186986	8.11825424990832e-07	9.18945025641615e-06
sdz-10	-1.01639135637927	8.14558677595836e-07	9.2152866884846e-06
B0361.11	2.10969388831894	8.17264690122625e-07	9.24078653770842e-06
C27B7.6	2.36765516970954	8.24931967523298e-07	9.32232405311154e-06
ZC116.5	2.42671200027679	8.26096575984226e-07	9.33032723914117e-06
sod-4	0.40738236498698	8.34800139480318e-07	9.4234231095506e-06
fbxc-30	-1.11938013771194	8.46855796811449e-07	9.55423457738214e-06
T17A3.12	-1.65268729149658	8.48388316290835e-07	9.56624509097272e-06
T27E7.1	3.05956938026825	8.50683588282481e-07	9.58683825537969e-06
syd-2	-0.36737782686459	8.51430942158109e-07	9.58997396723869e-06
C28C12.11	1.73870976468902	8.62221070334238e-07	9.70615932865795e-06
H34I24.1	2.48651184935823	8.63258136359177e-07	9.70994420283167e-06
F19F10.1	-0.768890231656633	8.6350724261351e-07	9.70994420283167e-06
glct-6	0.615522807330733	8.76824751824392e-07	9.85427619656187e-06
W02A2.8	1.03732011885933	8.77827511263097e-07	9.86012517184147e-06
kin-5	2.99929422569083	8.88699157384262e-07	9.97675830554995e-06
nhr-38	-4.34461642205158	8.93207228075328e-07	1.00218635365225e-05
mpz-3	2.58648734413813	9.0000958869471e-07	1.00926472965913e-05
T22E5.1	-1.02685201092587	9.04547462104433e-07	1.01379735569084e-05
pes-2.1	-1.6106046920225	9.05543139694065e-07	1.01420475661889e-05
D1005.4	0.719090001541938	9.05903187196638e-07	1.01420475661889e-05
cyc-2.2	2.6978570320596	9.10192977818596e-07	1.01844964671842e-05
C05C12.4	0.424024290918865	9.10995875955187e-07	1.01879040985514e-05
Y48G8AL.13	0.346762108520876	9.12865757601581e-07	1.02032338341439e-05
C50F7.3	2.99135168358469	9.15881554682039e-07	1.02313478810737e-05
Y54G2A.52	0.598639426115132	9.18049816197761e-07	1.02499685377012e-05
zip-5	0.865639882959465	9.19675582059011e-07	1.02625152423757e-05
H14N18.4	0.43475837739165	9.20682310495658e-07	1.02681442844859e-05
C28C12.4	1.42101882705088	9.25924593457829e-07	1.03209795332925e-05
lon-2	-0.282303339114721	9.28683933589468e-07	1.0346095724452e-05
pitr-4	2.53208976160179	9.29352234705487e-07	1.034790181595e-05
Y34F4.4	1.01386392983676	9.30378139728175e-07	1.03536855255651e-05
C50A2.3	0.858653920010446	9.30964311548975e-07	1.03545720462436e-05
ssp-33	2.9079642113722	9.39739801508304e-07	1.04464930735368e-05
fbxa-46	-1.180387433866	9.46828777371323e-07	1.05195764651098e-05
Y67A6A.1	2.80517814953677	9.5050592324524e-07	1.05546945078232e-05
F40E3.5	1.20725150600048	9.53144432511909e-07	1.05782473582198e-05
C32E12.1	2.80541643235363	9.55304070502747e-07	1.05964628938077e-05
set-15	-0.313586305286679	9.71238178831394e-07	1.07647352278551e-05
Y57G11C.8	0.463318951161599	9.71527490847363e-07	1.07647352278551e-05
C06E2.5	-0.35977820744294	9.77486407767879e-07	1.082489416793e-05
nhr-161	-0.442365222621161	9.81935897840151e-07	1.08682812991588e-05
Y104H12D.2	0.228489896291	9.8296709789781e-07	1.08738075661931e-05
dpy-17	-1.60919612845639	9.97240704932607e-07	1.10257391730326e-05
dpy-11	-0.193349534067335	9.9949754165493e-07	1.10447179697577e-05
F42A10.6	-0.429720723960496	1.00290246095991e-06	1.10763560288512e-05
C18G1.9	3.03084459132629	1.01199516903544e-06	1.11707436504274e-05
col-139	2.06700734862632	1.01742665819841e-06	1.12246374385052e-05
C52E4.7	2.01484883542298	1.01976308389376e-06	1.12443455900972e-05
nlp-27	-0.911158080829514	1.02130108484556e-06	1.12552334649583e-05
Y69E1A.3	3.14836566921648	1.02785272354281e-06	1.13192262179802e-05
F54B8.4	0.661531698652631	1.02821518792688e-06	1.13192262179802e-05
M163.1	0.64265758925831	1.04230229284482e-06	1.14681301252027e-05
nep-8	2.75441861598766	1.04639605866024e-06	1.150697935836e-05
F56D6.13	3.08106806436415	1.05189193882402e-06	1.15611972609567e-05
C27D6.3	3.02329965709802	1.0527725160306e-06	1.15646580038762e-05
ZK380.t2	-1.5338746460689	1.05674034344109e-06	1.16020101186714e-05
lido-15	0.823619905759984	1.06221693432282e-06	1.16558780399148e-05
F32B5.1	2.17736132044904	1.06875154076603e-06	1.17159466749522e-05
C34B2.3	2.60525914464667	1.06883728165073e-06	1.17159466749522e-05
C48B6.4	3.06706417078537	1.08201973417067e-06	1.18532173762699e-05
sms-3	0.430700633235839	1.0825200235531e-06	1.18532173762699e-05
F53G12.8	1.42203645029046	1.09542133998462e-06	1.19880612705062e-05
Y41C4A.7	3.99777576818905	1.09689465021335e-06	1.19977620836337e-05
C10H11.7	3.35278142220104	1.10288217346959e-06	1.20568022846197e-05
jmjd-1.1	3.05778605459829	1.11434437854882e-06	1.21755970767896e-05
alh-9	-0.345492466780896	1.11505851926359e-06	1.21768917250564e-05
sma-10	0.564586685959114	1.11966623079264e-06	1.22206816636913e-05
T05D4.5	2.04769597037685	1.13028051554324e-06	1.23268271586272e-05
ets-7	-0.731701511255746	1.13059731558118e-06	1.23268271586272e-05
T08B2.12	2.57126325012447	1.15741139016998e-06	1.26124525848853e-05
ref-1	-0.403517377022122	1.16082004655947e-06	1.26428578645792e-05
F20C5.6	-0.713147147575192	1.1704432094488e-06	1.27408788768699e-05
ssp-11	2.48790192118181	1.18731367861773e-06	1.29176442426729e-05
Y66D12A.3	1.22702916946306	1.18940979154903e-06	1.29335661535302e-05
cnb-1	0.329401841517543	1.19465690039384e-06	1.29837166479273e-05
ifb-2	0.5568925860147	1.20699980874337e-06	1.31108911212225e-05
C11H1.7	-0.944737448790749	1.20871495344438e-06	1.31225490139476e-05
aat-8	1.10569333920521	1.21293454531835e-06	1.31613699097362e-05
F52F12.5	2.72477773255967	1.2143937229624e-06	1.31702126676501e-05
oac-7	0.875112784860104	1.21504905917612e-06	1.31703329357038e-05
F48F7.5	0.577755411606552	1.23342563365712e-06	1.33624378531279e-05
C08F8.6	2.21486609506414	1.23416163787073e-06	1.33633296414149e-05
T04F3.3	2.79828969259443	1.23967748272438e-06	1.34159485332634e-05
F36H12.4	3.00411873233043	1.25713016894852e-06	1.35976254200077e-05
acs-15	2.69848592833123	1.26379375028654e-06	1.36624725738275e-05
C01F6.2	0.937033087177392	1.26519647378997e-06	1.36704077767909e-05
Y92H12BR.4	-1.19593114415802	1.26593364673282e-06	1.36711471421865e-05
ZK1225.4	3.01070268483236	1.2693320186139e-06	1.37006095335396e-05
F27D9.7	0.617021225573018	1.27085691307758e-06	1.37098300126886e-05
F20G2.2	-0.377179041976834	1.27241806862137e-06	1.37159067213719e-05
gtf-2A2	0.383662408372413	1.27276207261373e-06	1.37159067213719e-05
T15B12.2	2.46481121831636	1.28030616583948e-06	1.37899362214207e-05
cwn-1	-0.520713521243438	1.28131027588323e-06	1.37934839230547e-05
col-12	2.32823003581718	1.29759489259531e-06	1.39614380996452e-05
F36A2.14	2.14806661460173	1.29942118096132e-06	1.39737334047302e-05
tpra-1	0.710884954569286	1.30522286050852e-06	1.40287439208074e-05
sma-6	0.436374994584894	1.30602116802996e-06	1.40299478392204e-05
21ur-8684	2.80545442550481	1.31700955505525e-06	1.41405600493669e-05
T19D12.5	2.0212306855466	1.32362418112025e-06	1.42041202806516e-05
ztf-20	0.275640910707605	1.32710898150302e-06	1.42340445481985e-05
C08D8.1	0.906837511102244	1.32815861462397e-06	1.42378324901719e-05
sfxn-1.1	2.85152132219685	1.331716122291e-06	1.426848673375e-05
Y38E10A.28	-0.80690126747203	1.34447709430418e-06	1.4391466889295e-05
Y48G10A.3	0.263607197286829	1.34460215029856e-06	1.4391466889295e-05
Y116A8C.24	3.00940638052439	1.35176473333119e-06	1.44605580552012e-05
ZK353.4	2.18132490191058	1.35397991970218e-06	1.44766796540124e-05
C55B7.3	0.640442796691016	1.35874315247886e-06	1.45200137303321e-05
cnc-4	1.55703320566131	1.3614764439859e-06	1.45416211830741e-05
R08C7.5	2.92706266478965	1.38228117835122e-06	1.47561222605921e-05
C56C10.6	3.08443247291773	1.38555771436602e-06	1.47815817969651e-05
Y57A10A.4	0.395222509561621	1.3861122293588e-06	1.47815817969651e-05
C50F7.5	1.86276534435839	1.38813972877519e-06	1.47954851279203e-05
C18D11.1	-0.731864979629645	1.38956054666152e-06	1.480291102418e-05
cgt-1	1.34628853828673	1.39602759696446e-06	1.48640584191377e-05
Y52B11A.19	-1.35456936625852	1.4013920236668e-06	1.49134081935557e-05
Y71F9AL.4	0.392676357824235	1.40245357815333e-06	1.4916939905405e-05
pals-31	1.05110312716665	1.41658075133372e-06	1.50593657303772e-05
F36A2.11	2.86816439334713	1.42036989619767e-06	1.50917992660961e-05
gad-3	0.700826030401212	1.4230471829042e-06	1.51123914597977e-05
coq-3	0.262220154570368	1.43010259741169e-06	1.51757909266614e-05
nspd-5	2.54547094568347	1.43050184002722e-06	1.51757909266614e-05
best-20	0.306265937495208	1.43430290267659e-06	1.52082231532249e-05
F53F1.2	-0.348555989821492	1.4372043919403e-06	1.52310883278567e-05
hyl-2	-0.294098601402169	1.44308504685767e-06	1.52854858097987e-05
F11F1.1	-0.734435069367896	1.45240096245769e-06	1.53761951711665e-05
lite-1	0.627174614499543	1.46009103085674e-06	1.54496071137704e-05
F58A6.5	2.48516225439981	1.46516517751406e-06	1.54952776636937e-05
Y53F4B.36	3.63137203316727	1.4682686152963e-06	1.55200699599287e-05
fbxb-112	-1.1507259048204	1.47822180773174e-06	1.56172033154832e-05
C01G5.4	2.89334545280917	1.48602249503024e-06	1.56915071621401e-05
C01A2.1	-0.936653417285233	1.49177152525334e-06	1.57440812032803e-05
fbxb-31	-0.798060030187223	1.49841329199935e-06	1.58060180228807e-05
K09E9.3	-0.376617361050978	1.50423686674184e-06	1.58592647069641e-05
dus-2	0.248612331999285	1.52709768291815e-06	1.60919886246885e-05
fbxa-219	0.994749161850519	1.53459628301176e-06	1.61626748138122e-05
acbp-4	1.51676765881801	1.5412579613981e-06	1.62244781178483e-05
T03F6.6	3.04222152597739	1.55021872425078e-06	1.63104072979201e-05
R10E4.7	0.907171507269709	1.57916645875942e-06	1.66064299981578e-05
F46A9.1	2.42645254023802	1.58124597926149e-06	1.6619748870973e-05
clec-65	0.480762444022811	1.58492171270576e-06	1.66498224937532e-05
F31D5.6	-0.885323655546162	1.58995336150247e-06	1.66941019872599e-05
F20H11.4	1.66197229306548	1.59355559716129e-06	1.67233352529611e-05
msrp-6	2.7903541581148	1.60674796988788e-06	1.68531291679928e-05
nspe-2	1.8349691012157	1.60785178016216e-06	1.68560584317205e-05
T27C10.8	2.42910929337158	1.62106421994363e-06	1.698586153168e-05
C23G10.1	1.27356104052127	1.62317355929655e-06	1.69992505495386e-05
fbxb-48	-0.870876846506448	1.64401444553518e-06	1.72086980594345e-05
ZK546.3	1.48668611861006	1.64631445419204e-06	1.72239541387143e-05
B0250.4	-0.630217141017882	1.6582816510682e-06	1.734028224695e-05
dhs-18	0.485847223841779	1.66008850006148e-06	1.73503012304482e-05
R02D5.3	1.08443728639785	1.66230163731252e-06	1.73645540989166e-05
F53A9.7	0.825205213305179	1.69738043778258e-06	1.77219347750711e-05
vab-3	-0.810881383259148	1.70492469952827e-06	1.7791615943061e-05
M70.1	3.08712381872062	1.72143930520717e-06	1.79547876103827e-05
T16H12.1	0.389482265697401	1.7287926391746e-06	1.80222885888048e-05
fbxa-90	0.568817370557536	1.7467885421486e-06	1.82006106866176e-05
Y42H9AR.2	1.45393408573403	1.76433836779456e-06	1.83741055796353e-05
acs-6	1.56925432569157	1.77954351541457e-06	1.85230183735336e-05
cylc-2	2.79518132409191	1.78825956343609e-06	1.86042698500376e-05
F26A1.3	3.48211148624806	1.80658003911096e-06	1.87853081076019e-05
H20E11.1	0.585868541181469	1.80852396009448e-06	1.87959610148508e-05
C46H11.2	-0.644092854927402	1.83153974319089e-06	1.90254913465708e-05
M03D4.4	-1.20161041343711	1.83755792954664e-06	1.90783122162122e-05
F58F12.3	3.31055881642038	1.84339067161007e-06	1.91291550760023e-05
R01H2.2	2.9055147775857	1.85804584751289e-06	1.92714516797088e-05
F38A5.6	2.58235161965825	1.86575048899821e-06	1.93415503278856e-05
F36H12.9	3.56651462735308	1.90475261901824e-06	1.97358630464217e-05
Y53C10A.10	2.04636253077284	1.90701854478112e-06	1.97493313632019e-05
ZC47.8	1.63181470973862	1.9098841256813e-06	1.97689930031913e-05
sma-5	0.485155992575983	1.91663458348705e-06	1.9828826310843e-05
drd-10	-1.08624076155003	1.94221297815701e-06	2.00832877655355e-05
folt-2	0.35369448555765	1.94907385819122e-06	2.01440429135506e-05
Y43C5A.7	-1.15286353823739	1.97263655369363e-06	2.03772658247392e-05
unc-108	0.20831686811438	1.97642252095337e-06	2.04060634322474e-05
W06G6.17	-1.51354085328331	1.9790923825218e-06	2.04233142735453e-05
M117.7	-1.05999972059948	2.00665923934369e-06	2.06973435065102e-05
zoo-1	-0.437154025138313	2.01945277354381e-06	2.08187962932709e-05
msp-10	2.77489799073955	2.02178836990197e-06	2.08323687731381e-05
C07G1.6	2.3374397513661	2.02898817937001e-06	2.08960228467814e-05
clec-171	-1.42553313582718	2.03281723867808e-06	2.0924915815859e-05
C25A11.10	-0.337430057734397	2.05948917275722e-06	2.11887957517241e-05
F18G5.6	0.502042920608985	2.07416038903073e-06	2.13290044431364e-05
T08A9.6	-0.500931673451895	2.07889715785937e-06	2.13669656099141e-05
ZK1248.5	3.51196702181159	2.08630253512782e-06	2.1432302877195e-05
dao-2	-1.86532783104425	2.12456153156106e-06	2.1814370361478e-05
W06F12.3	1.85284643265058	2.13109092998632e-06	2.1870427651461e-05
M110.7	3.1605804577239	2.14229926865201e-06	2.19744224531124e-05
slc-25A42	0.261409362736225	2.14597451651516e-06	2.20010817658573e-05
tli-1	0.355412184363494	2.16177593831867e-06	2.21519726852374e-05
T01C8.2	-0.611048415517661	2.18037002563338e-06	2.2331314846705e-05
let-805	-0.667479720722506	2.19066634725248e-06	2.24255343699962e-05
F58B4.5	-0.50500885621097	2.20404337459283e-06	2.25511805339345e-05
kqt-1	-0.709959998190885	2.22956966892485e-06	2.28009468443375e-05
[truncated: 28,058 more rows]

## Sheet: 50ppm 2h vs Con 2h
	log2FoldChange	pvalue	padj
Y94H6A.10	2.88127109148898	2.83357341632871e-82	5.15171982822723e-78
ftn-1	-4.43299383917573	7.01148367687695e-68	6.37378923646499e-64
gst-19	6.59598568569963	3.8956188192365e-60	2.36087485841796e-56
sqrd-1	2.60069025954442	6.16066176376091e-58	2.80017478817343e-54
hsp-70	5.23203808444803	2.14766514623193e-45	7.80934000472854e-42
nit-1	2.59487513655274	1.23215092753184e-44	3.7336226689094e-41
semo-1	2.35404681509547	1.43328839096835e-42	3.72265946231366e-39
hacd-1	1.68575082842335	9.75932589827367e-39	2.21792880195642e-35
skr-3	1.10369691679425	2.97288624663402e-38	6.00556053889478e-35
hpo-15	1.18284347588297	3.058107879527e-36	5.55994593576804e-33
nlp-24	-1.67757698299897	1.1332098329573e-35	1.87298981572697e-32
ftn-2	-1.19109360969507	2.53999585654921e-35	3.84830538899343e-32
F44E5.5	3.76652755715109	1.80725841826619e-34	2.52752040788444e-31
F19B2.5	1.80927758104404	1.3626210402595e-30	1.71430847652882e-27
pbo-4	0.848773662428188	1.41436813970256e-30	1.71430847652882e-27
swt-6	2.01282527807697	5.40483712787516e-30	6.14158398886864e-27
lys-2	1.66369054755258	7.02842943829634e-30	7.51669856574505e-27
lys-3	4.58145936015933	1.24199050597695e-29	1.25447941050927e-26
T19D12.4	1.89809113028502	7.22825023094935e-29	6.91667460257317e-26
W05H9.1	1.48994437205492	2.75801185498807e-28	2.50717067677691e-25
C18H9.6	1.1778835959678	7.70662704636986e-28	6.67210411095478e-25
hsp-16.2	5.45026727504822	1.13861715641936e-26	9.40963569130021e-24
R08E5.3	1.99907817393558	1.20256221987729e-26	9.5059929215604e-24
grd-14	-2.00886410448676	2.67866111723238e-26	2.02919740718341e-23
valv-1	1.53870722363649	6.41144783787511e-26	4.66266132561629e-23
Y22D7AL.11	-1.61904286649103	1.01012498515767e-25	7.06349321351985e-23
pcp-2	-1.74676660812844	1.50980644247984e-25	1.01665892336022e-22
F46F2.3	-1.94391534629914	1.85640678327675e-25	1.20540470452695e-22
cat-4	1.14347017302699	3.18681480562687e-25	1.9688685606069e-22
ugt-22	-1.16001238326674	3.24877932007078e-25	1.9688685606069e-22
cysl-2	1.84611625810339	4.83207233732216e-25	2.83393248918885e-22
hsp-16.41	5.39999936813548	7.74097512825845e-25	4.39808340021459e-22
K08D8.5	1.30345280218379	8.03339110385388e-25	4.42591162603538e-22
col-98	-1.56785715395885	1.04488908135421e-24	5.58739070238261e-22
cdo-1	1.83109407143825	5.43927527675428e-24	2.82547039447627e-21
C34H4.1	2.45889845989432	2.49670121279172e-23	1.26090346527128e-20
C10C5.5	-2.23408441742602	4.78026734059326e-23	2.34892001403584e-20
B0024.4	4.02131606639944	9.71149133509513e-23	4.64643747272012e-20
C50F4.1	1.06316481254422	1.0162943115548e-22	4.73775560984047e-20
F40H3.2	-1.85116981922583	1.53294309746284e-22	6.96760961374297e-20
vha-11	-0.554887954540714	1.65620361474657e-22	7.34425315114814e-20
irg-1	4.56132498495268	2.64552584551349e-22	1.1451977475543e-19
T12B5.15	-1.25493849324218	4.28138042234754e-22	1.81022738276048e-19
lgc-35	-2.0727221751388	1.38093507277566e-21	5.70608649048508e-19
Y37H2A.14	2.25371606852433	2.59187904614957e-21	1.04717673195656e-18
acp-6	-1.15254693004676	2.87175737365368e-21	1.13503088718255e-18
dod-22	2.39742423073723	6.61656547895944e-21	2.55948461644599e-18
hpd-1	-0.799983112442547	1.42945553792224e-20	5.41436065311757e-18
T10B10.4	-0.830514135245634	1.51981540355711e-20	5.63913548001465e-18
mfsd-11	-1.09133692848971	3.44128678730019e-20	1.23405787292456e-17
vha-13	-0.446822009009434	3.46168810951832e-20	1.23405787292456e-17
col-42	-1.35199608441442	3.70156623835464e-20	1.2941956880678e-17
C32F10.4	0.969666151202016	4.48024267419222e-20	1.53689230300922e-17
vha-12	-0.551201683516888	9.57828839641683e-20	3.22486780250471e-17
C17H12.8	1.29593734480602	1.26942596269481e-19	4.19626062322806e-17
F33H12.7	4.84264762601254	1.95544232484546e-19	6.34855301928844e-17
F44E5.4	3.74454102715777	3.76010651136132e-19	1.19934204356246e-16
sft-4	-0.400659847453887	4.88781939256768e-19	1.53216283407367e-16
clec-66	1.37338863828058	5.1608668779407e-19	1.59033424928542e-16
F44A2.3	1.30856878257181	5.63257817022513e-19	1.70676506188105e-16
ZC374.2	-1.07998113904357	6.01964598050595e-19	1.79415055035375e-16
M162.5	1.43526874718172	6.15078340932578e-19	1.80366763169277e-16
pals-39	5.24638169597983	7.00822485457681e-19	2.02248469969938e-16
oac-32	2.69890472415972	1.0079938769354e-18	2.8634901057129e-16
pho-7	-1.33286590764366	1.03278800274518e-18	2.88878748890925e-16
pals-24	1.39334806460452	1.35887214781469e-18	3.74328098779075e-16
cah-4	-0.794072693787726	2.34868839233865e-18	6.3733587553894e-16
T10B5.8	-1.93120526833945	2.39562953355239e-18	6.40513831610529e-16
tps-1	0.626565164914098	2.61477781025295e-18	6.8897500533636e-16
C34H4.2	1.53026197116723	2.75605542202693e-18	7.10509802442054e-16
col-80	-1.39005257861729	2.77466563848995e-18	7.10509802442054e-16
C49G7.12	2.90125607606948	3.46771424885005e-18	8.7564601053254e-16
hsp-17	1.57526919853069	4.48581303900626e-18	1.1172132446873e-15
hgo-1	-0.584144591629618	6.70390054051703e-18	1.6470758882046e-15
lfe-2	0.705048425518993	1.0141086495459e-17	2.45833458098586e-15
ugt-31	2.07106533331821	1.50462682529501e-17	3.59942372509061e-15
R06C1.4	-0.953525597172101	1.6295071822026e-17	3.84754156878253e-15
cyp-35D1	-1.64079794234799	1.85994585166322e-17	4.33534301654986e-15
col-103	-1.37714548391993	2.16687365155757e-17	4.98682656442636e-15
K08D8.6	0.76100342480404	2.44330257244362e-17	5.55271050869967e-15
mxl-3	-0.936931533878753	3.67711110715833e-17	8.2535255604007e-15
nlp-26	-1.72947229062491	4.58497103605039e-17	1.01657754154186e-14
C09F12.2	-2.23459189710303	4.70310602667875e-17	1.03020687555477e-14
clec-4	1.81036795676695	5.07275255334614e-17	1.09794897824269e-14
C35C5.10	-0.932369421185764	7.3387682002559e-17	1.56971934881003e-14
F54B8.4	1.25083579319298	9.7682946175595e-17	2.06508563304476e-14
C55A6.4	-1.45737172159942	1.11891436209896e-16	2.33827379509438e-14
tth-1	0.982275968347823	1.23542037102762e-16	2.55240656427877e-14
tag-244	0.995156843512591	1.54042182603516e-16	3.1131389290704e-14
F29C6.1	1.53104969203227	1.54107311818017e-16	3.1131389290704e-14
D1086.3	-1.41716951272532	1.67840098735284e-16	3.35329762099582e-14
cpt-5	-1.11538904949941	4.20261574736513e-16	8.30519096770059e-14
W10G11.3	-1.68735071322114	5.15868842521679e-16	1.00849585224588e-13
smf-3	1.86571317430391	6.06403232116577e-16	1.17287416628846e-13
dct-16	-0.832241100186771	6.63528590193581e-16	1.269854031401e-13
F55H12.4	-1.22927086036879	8.20152573009336e-16	1.55324936769612e-13
F54B11.11	-1.38878437959191	9.26716719111371e-16	1.73697285259421e-13
F31F7.1	1.13622656496319	1.57964240966947e-15	2.93055904593883e-13
cup-16	1.13644900609365	1.84424493413602e-15	3.38689062096233e-13
F25A2.1	2.0916769292294	2.00883481779259e-15	3.6522625822287e-13
skr-4	0.884661355709396	2.47576477195644e-15	4.45662171474654e-13
mpst-3	1.30601835505198	2.76915130627871e-15	4.93587646073071e-13
col-101	-0.892940591609461	3.9090455391248e-15	6.90003465503183e-13
oac-20	1.35722074664451	4.264622144719e-15	7.4552976166477e-13
abu-10	3.78984283332484	4.61600742964724e-15	7.992726769373e-13
Y47G6A.19	-1.38301788358858	6.82004768753539e-15	1.16976685855737e-12
vha-15	-0.461058503156289	1.33148552385162e-14	2.26240544945292e-12
lgmn-1	1.36409133701243	1.39863279820156e-14	2.35449471334283e-12
vha-8	-0.371644760473687	1.77185655644752e-14	2.95542422502499e-12
K12B6.11	2.65749137893861	2.01736887573742e-14	3.33434395725291e-12
C41G7.8	1.38689322545149	2.09160719199343e-14	3.42590183402095e-12
W05E10.1	1.0778839194519	2.32362742083154e-14	3.7719526909052e-12
cest-29	3.56812375776334	2.60180833834993e-14	4.18614844243718e-12
nep-22	-0.846096720620603	2.75350795452703e-14	4.39136211589964e-12
F23D12.11	-1.11895113069651	2.85026199885997e-14	4.50614029576289e-12
Y40B10A.9	0.645213713265165	3.05056374221011e-14	4.78123270664844e-12
F57F4.4	-0.880263907883978	3.70459977449119e-14	5.74995528605903e-12
his-41	0.545018136899905	3.73188891565352e-14	5.74995528605903e-12
ttr-35	-0.5786598320667	5.74197363165239e-14	8.77267416782118e-12
cdf-2	1.07018833636572	6.88669653450665e-14	1.04339191411555e-11
M01H9.2	-2.47324692341286	7.15161597106022e-14	1.07457462784997e-11
hpo-19	-0.37790623511846	7.31175689814267e-14	1.08963157512403e-11
Y47G6A.33	-0.771569075115362	7.70205526360593e-14	1.13564922162989e-11
fbxa-182	1.77986175867587	7.74547623794659e-14	1.13564922162989e-11
T05E7.1	0.892310832059518	1.04358494444551e-13	1.51787342999711e-11
dhs-9	0.442153796655492	1.05468395486026e-13	1.52184198280273e-11
zip-10	2.4865660019477	1.43156816930673e-13	2.04939692017053e-11
F46C5.1	2.60748448952227	1.46895331743309e-13	2.08648752064462e-11
oac-14	2.97714145631946	1.76223407995399e-13	2.48365719439097e-11
F46A8.13	1.86086670910845	1.92825414335274e-13	2.69673758309971e-11
ctl-2	0.611700998836659	2.00901823779683e-13	2.78824126575452e-11
ZK896.4	1.08766441773496	2.27791463124967e-13	3.13748226596593e-11
sams-1	-0.839844769432896	2.59554294672784e-13	3.54808769281645e-11
cpg-9	-1.21388455956281	2.63194946060003e-13	3.57100545844546e-11
lact-6	-2.69781848405534	2.69034016787145e-13	3.62319071052377e-11
pgap-3	0.504268487935579	2.84137952275435e-13	3.79846478699977e-11
hda-5	0.822091832059281	3.20893141935463e-13	4.23667505528222e-11
F21C10.10	1.20720636338904	3.21578107710767e-13	4.23667505528222e-11
fbxa-60	1.34842955087678	3.3058580959091e-13	4.32401482314556e-11
cyp-13A7	2.59810318901788	3.37836634660817e-13	4.36044280628554e-11
Y22D7AL.15	0.813023068320056	3.38167557167516e-13	4.36044280628554e-11
ZK742.3	-0.969218511546788	3.88403205299839e-13	4.97292864475801e-11
tag-120	0.875347407342907	4.13255524380192e-13	5.25412495717221e-11
C29F3.7	0.717929756465524	5.07274518867906e-13	6.40469307467875e-11
H20E11.1	0.976831827442012	5.57527594360522e-13	6.99062702970251e-11
C18E9.9	0.777291504066369	5.97385914598978e-13	7.43909131049591e-11
ugt-14	2.26400880284789	6.26747741932198e-13	7.75163312657776e-11
lact-3	0.516963221707625	6.55065287735356e-13	8.04712297048413e-11
cyp-37B1	2.62759249891873	6.7433608311087e-13	8.22825793760988e-11
skpo-3	-1.18449141706286	7.26839942063748e-13	8.809784657774e-11
F53C11.1	0.90832014239001	1.04496509722559e-12	1.25817949885155e-10
R10E8.8	1.18957975388795	1.06784396489543e-12	1.27573265151191e-10
clec-83	0.775112100087363	1.07357733722745e-12	1.27573265151191e-10
col-184	-0.892372829952813	1.143737778272e-12	1.35027899654307e-10
F26H9.5	0.530983090977557	1.36199291437479e-12	1.59757375330633e-10
linc-37	2.46140107183277	1.92824612686664e-12	2.24727197644631e-10
C49C3.9	0.862598614843632	2.02895717734252e-12	2.34958410453913e-10
twk-34	-0.958912598159056	2.13382590151151e-12	2.45538536173296e-10
dhs-2	-0.58625122856587	2.57300055870595e-12	2.94212095332282e-10
ZK1307.1	0.757107860182228	2.68526005061134e-12	3.0512945612603e-10
col-94	-1.55338140033888	2.75313259531796e-12	3.10898780841465e-10
F27D4.1	-0.306246231344966	2.87506554094255e-12	3.22663991357262e-10
Y54G2A.49	2.21255199631711	3.40481624704255e-12	3.79772786426262e-10
vha-16	-0.321787669452129	4.01885875632693e-12	4.4552970151695e-10
oac-54	-1.23524236842075	4.25513037851429e-12	4.68863790374353e-10
T25B9.1	-1.09839309744971	4.69100135335576e-12	5.13777684369645e-10
vha-4	-0.332413388365975	4.72482108492142e-12	5.14383066736266e-10
nmad-1	0.554066450120565	4.798178036146e-12	5.19259969495062e-10
Y46G5A.20	1.54508131438504	4.97781059036887e-12	5.35512274221872e-10
tag-234	1.33986854822972	5.23653172227158e-12	5.60031666133057e-10
nhr-35	0.798976687254121	5.70580888636544e-12	6.06650943643333e-10
F36H9.4	-0.982833758324475	5.88702749273974e-12	6.22279342125007e-10
Y92H12BL.5	0.58641850503687	5.9757674208829e-12	6.28008251324116e-10
Y71F9AM.9	2.14295983371328	6.15787198146178e-12	6.42093299464461e-10
R02D5.3	1.72928358825914	6.18042612652113e-12	6.42093299464461e-10
pgp-5	2.77397183602428	6.52412133590997e-12	6.73949147773746e-10
F09F3.8	1.58151096165287	8.38212456221201e-12	8.60990998110602e-10
K07E1.1	-1.23097359173184	8.76033332042696e-12	8.94784382576868e-10
vit-1	-0.866232982915917	9.01436502704721e-12	9.15587545009751e-10
K09C4.1	1.2005958832235	1.01283007766218e-11	1.02301464677645e-09
T24C4.4	2.48329368504303	1.03447705362171e-11	1.03910648132024e-09
B0250.5	-0.357589137534823	1.07575039501052e-11	1.07462735888386e-09
trap-1	-0.479700806710898	1.36159382649835e-11	1.3527397464244e-09
F08F1.4	0.847799434561025	1.46842470899272e-11	1.44873872616403e-09
F44B9.2	-0.865467408466874	1.47415799098149e-11	1.44873872616403e-09
acdh-2	-1.39243853110305	1.66488068475912e-11	1.62737611449492e-09
fat-3	0.493752574461598	1.75577351601461e-11	1.70704375907282e-09
vha-5	-0.705646614859769	1.85941946370565e-11	1.79819708881024e-09
tts-1	1.97175377892358	1.96537953283647e-11	1.89061191992062e-09
cnc-3	-1.00787445598903	2.01501571666269e-11	1.92815793392865e-09
Y54E10A.17	-0.889284931671526	2.13183286988412e-11	2.02925934069964e-09
fipr-21	-1.07574200043604	2.29571951201124e-11	2.17387898166023e-09
Y47H10A.5	2.11596224557532	2.37648808372676e-11	2.23870102850964e-09
tnt-3	-0.726825384950502	2.69962337866422e-11	2.52999240451001e-09
F46F2.5	-1.22677931911002	3.00578649826795e-11	2.80247201666716e-09
C08E8.4	2.55080396236136	3.42155038781928e-11	3.17383712249706e-09
C18H7.11	1.05237039460108	3.46801885541664e-11	3.2006117162604e-09
F32A5.4	0.936271920265136	3.48925606720578e-11	3.20394770494284e-09
T16G1.4	1.38059171002553	3.62205225209585e-11	3.30917246207812e-09
best-7	0.989924436055826	4.1328753017899e-11	3.75699029309211e-09
col-110	-2.59882777583831	4.20618748090343e-11	3.80461167115947e-09
col-106	-0.837129146401827	4.41126545021487e-11	3.97035728467111e-09
clec-47	1.39991228932386	4.59305936722349e-11	4.11361637219164e-09
tyr-2	-1.22685849248711	4.73721386239547e-11	4.22192574667706e-09
vha-20	-0.473072458447826	4.85297558288588e-11	4.30399751572918e-09
Y38E10A.9	4.58286260100065	4.87705621187005e-11	4.30435723242764e-09
grd-5	-0.831882805610932	4.93854359701959e-11	4.33756817088952e-09
F10A3.17	0.889886489849935	5.01204652084108e-11	4.38096239401018e-09
F20G2.1	1.55666402060737	5.56346263943929e-11	4.83968010754286e-09
T22B7.3	1.67429648644034	5.63291352875201e-11	4.87676194601144e-09
Y43F8B.24	1.19046284029793	6.1238571159375e-11	5.27667517653364e-09
T16G12.1	-0.981036527013272	6.61280210665666e-11	5.67110165571343e-09
C42D4.1	0.83226004503705	6.6629134428616e-11	5.68725020209703e-09
H41C03.1	-0.853313485788504	6.69678682575834e-11	5.68945239622021e-09
hsp-16.11	4.75234651924597	7.16935373839788e-11	6.06260559617729e-09
pgp-6	3.01142935879706	7.22827019474792e-11	6.08165758019375e-09
B0395.3	-0.352766583610814	7.25878496728477e-11	6.08165758019375e-09
ttr-26	1.42041346827148	7.57519012843084e-11	6.31763906995418e-09
spl-2	-1.43557342845079	7.92981553224828e-11	6.58319525989982e-09
bckd-1B	-0.354607847185855	8.24599773525093e-11	6.81456749202714e-09
Y37D8A.16	0.833969164164867	8.4138617737183e-11	6.92182900036074e-09
poml-2	-1.10426501463545	8.57825276928036e-11	7.02527989181469e-09
kreg-1	2.86959200055654	8.68891129960346e-11	7.08399535148388e-09
zipt-2.3	-1.54824298324169	8.98333810605062e-11	7.29134241545118e-09
ilys-5	-0.598491875135458	9.35700192175172e-11	7.56087341952746e-09
hsp-16.49	5.96974164058151	9.70112974829956e-11	7.80425840503691e-09
dpyd-1	-0.746421481815839	1.04895012681715e-10	8.40130495844166e-09
Y105C5A.24	0.726101207658147	1.06362733851637e-10	8.48149501823075e-09
col-93	-1.27535094287699	1.12145023762346e-10	8.90353134071275e-09
sqst-1	0.903028041314282	1.15116524756766e-10	9.09971102870763e-09
K09G1.1	-0.805495033206036	1.21865315042983e-10	9.59148611600205e-09
F22B5.4	1.54208559574314	1.23219778213469e-10	9.65628787801328e-09
F58F9.3	0.973415292297524	1.33515934480456e-10	1.04182540978076e-08
amx-3	-0.754045174682897	1.37242765552518e-10	1.06632936773946e-08
K12B6.9	0.664763204322586	1.39344460267975e-10	1.07805175835407e-08
F42G2.5	1.07751031612617	1.40019678018229e-10	1.07868549408874e-08
T01C8.2	-0.937659541694306	1.45331590832148e-10	1.11488339785624e-08
trap-3	-0.35578835732596	1.49138042110134e-10	1.13927678302703e-08
cyp-14A3	-2.04929369305738	1.52786392939474e-10	1.16226335147806e-08
C31C9.7	-1.32771725202411	1.5516037130572e-10	1.17540446279554e-08
F43C11.7	0.829418903727575	1.5678672686094e-10	1.18279646516961e-08
poml-3	-0.877300002310627	1.58399934289976e-10	1.19002859724217e-08
hrg-7	-0.82701713249228	1.62627336032588e-10	1.21676032774012e-08
fbxb-46	1.10790008140137	1.66306872556435e-10	1.23768883643976e-08
pod-2	0.669948628086147	1.66786076083682e-10	1.23768883643976e-08
C40H1.7	1.51731236092898	1.70237060682943e-10	1.25816260173845e-08
sdz-28	0.950224151211407	1.87201024704603e-10	1.37793596362526e-08
K11H12.4	1.64645403369515	2.00962523629918e-10	1.47326598472401e-08
ZK512.7	-1.0026358440526	2.04380193220989e-10	1.49230373210876e-08
ugt-46	-0.753112728411841	2.07549296399943e-10	1.50938150313894e-08
pals-23	0.889699223894329	2.15025277739361e-10	1.55751975082842e-08
B0228.7	0.514695318298747	2.22646210380375e-10	1.60632172655778e-08
grd-4	-1.26948062264224	2.30634269042243e-10	1.65737614444941e-08
F01D5.3	-1.31434272776571	2.43778859003043e-10	1.74493836044659e-08
nspe-6	6.13115568605408	2.51504296452175e-10	1.79317631913607e-08
grl-4	-0.876664594698441	2.54382285083369e-10	1.80661106449247e-08
F53A9.6	1.43325091318518	2.65201984954454e-10	1.87612345854355e-08
K10D11.5	0.899983696338295	2.67523146700086e-10	1.88520865509855e-08
F42A10.6	-0.619000157910607	2.76666196609522e-10	1.94211124345858e-08
lec-10	0.722472007698504	2.92130572121053e-10	2.04277920451264e-08
C06E4.3	1.67613405373199	2.95542148813251e-10	2.05183962782307e-08
ZK896.5	0.93927699796281	2.9568339612213e-10	2.05183962782307e-08
col-19	-0.944013638716345	3.03672243003655e-10	2.09926427758534e-08
col-181	-0.822972951253582	3.30865162508796e-10	2.27858315135319e-08
ZC449.8	-0.724208743527533	3.89862318390537e-10	2.67474973987107e-08
C48D1.5	0.774156071039138	3.97395235042804e-10	2.71618149184708e-08
cbp-3	0.972311898845189	4.22830017038599e-10	2.87920319841901e-08
ZC434.9	-1.16703146684768	4.63289599147455e-10	3.14293589630593e-08
Y53F4B.45	1.27215756478298	4.79357145761418e-10	3.23984842642689e-08
T05F1.11	1.38862996425222	4.83364053267917e-10	3.25483031572741e-08
clec-245	-2.09240411496834	4.85517239775919e-10	3.25726529017195e-08
F14B8.4	-0.750146937789415	4.96815132207587e-10	3.32080732303903e-08
K10D11.2	3.18792153703924	5.16742024434658e-10	3.44135045650055e-08
pnk-1	0.417204657757805	5.3067325067119e-10	3.52123006220909e-08
cest-32	0.815574957698013	6.26297411842926e-10	4.14062299807863e-08
col-119	-0.825763280939718	6.35020896413739e-10	4.18308511510804e-08
clec-65	0.688659007650988	7.04748809384969e-10	4.62564552470329e-08
K08C7.1	-0.464443009727798	7.11408267985626e-10	4.65255889217506e-08
his-37	0.528719151976846	7.4445101225202e-10	4.835073214158e-08
clec-69	-1.73619111457211	7.44634783545592e-10	4.835073214158e-08
F32D8.12	-0.563034772700459	7.58015522118897e-10	4.90444135503333e-08
vha-2	-0.290832117075241	7.72581393810109e-10	4.98095826980907e-08
mua-6	-0.968833652548385	8.5376010911128e-10	5.48488075750961e-08
tbc-14	0.332392142887928	8.81678676347537e-10	5.64429577981499e-08
fbxb-26	1.06314545362409	9.51718133660915e-10	6.07129382038214e-08
clec-170	-1.29609180322024	1.00889903480548e-09	6.41356410902045e-08
tba-4	-0.700790997955099	1.12655917300445e-09	7.13657572278536e-08
atg-4.1	0.259820361792404	1.2131404140911e-09	7.6583700932605e-08
acs-21	0.631886658618707	1.25543781013533e-09	7.89796360763685e-08
C18A11.1	1.11940065690698	1.27101280590157e-09	7.96837373244705e-08
gst-26	-0.704218694781011	1.27771527163753e-09	7.98286644455048e-08
B0222.5	-1.08811156603608	1.34008487123182e-09	8.34386405611842e-08
T23F11.6	1.72516668771886	1.672686561977e-09	1.03792199260423e-07
cyp-35A5	-1.16810264235747	1.68665974472865e-09	1.04303268091536e-07
grd-3	-0.839538790595579	1.77152435002021e-09	1.09179946466839e-07
K12C11.6	0.80115226145253	1.85704780961934e-09	1.13804750518743e-07
Y39B6A.1	-0.917232663784625	1.85908425851529e-09	1.13804750518743e-07
taap-1	0.364726810502268	1.89819526358569e-09	1.15809020427018e-07
M02H5.8	1.30797992047821	2.08112325595928e-09	1.26544822463531e-07
gsto-1	-0.833506173669178	2.11973802250446e-09	1.28463189957179e-07
grd-1	-1.60131899957548	2.38437893772412e-09	1.43620144342654e-07
lec-12	0.425201832658613	2.38563795123929e-09	1.43620144342654e-07
zip-12	0.908550152504489	2.67250109393712e-09	1.60358885771851e-07
pat-12	-0.562542769735952	2.75981468354750e-09	1.65053259084135e-07
R03D7.2	-0.680695390799088	2.77779411889693e-09	1.65583852051361e-07
cyp-13A5	1.76837065292485	2.81050920870213e-09	1.66986496481743e-07
F55C12.19	1.05131768781237	2.82883724976091e-09	1.67527980579489e-07
F13B12.2	0.595110157333824	2.87072815778771e-09	1.69456846223176e-07
trhr-1	1.17900058731967	2.88464241399733e-09	1.69727131808691e-07
C35C5.8	0.631837355400835	2.93774959626573e-09	1.72294275515184e-07
T28D6.3	-1.23915103541582	3.0068501015958e-09	1.75779876839592e-07
sec-61.G	-0.372310027810831	3.18751670120109e-09	1.85744362642747e-07
T04F8.7	0.853426633265441	3.2291249280668e-09	1.87567796540519e-07
sec-61.A	-0.404701624305055	3.29284428981037e-09	1.90659879086122e-07
rcs-1	0.669473956030778	3.305891230946e-09	1.90807645935966e-07
W10G11.2	-1.04856372025935	3.51349482403823e-09	2.02148257581769e-07
C04A11.5	1.85643080921167	3.60594590560573e-09	2.0681294167135e-07
hach-1	-0.401305968963809	3.72047542025212e-09	2.12710577407559e-07
D1022.3	1.56581194940415	3.84970875343616e-09	2.19409262840824e-07
elo-5	1.05726262905565	3.93109848226075e-09	2.23347817206196e-07
bas-1	-0.57642431681932	4.30084189760902e-09	2.43593789845575e-07
nhr-8	0.73083312662492	4.39143225085148e-09	2.47902973089352e-07
parg-2	2.67974906598405	4.41038167219987e-09	2.47902973089352e-07
W02D7.8	1.34877985526756	4.41782978279247e-09	2.47902973089352e-07
Y39E4B.6	0.648921763047935	4.45201478424438e-09	2.49052556284145e-07
F58G6.9	-0.985428241003758	4.6323378096129e-09	2.58345195449608e-07
asns-2	1.41759446056269	4.65687681132546e-09	2.58919502466998e-07
Y38H6C.23	1.79680175042265	4.73036812682808e-09	2.62203728395919e-07
C39D10.8	-1.09402836319723	5.71893732379129e-09	3.16036472595287e-07
C32E8.9	-0.4717244272754	5.90556033838226e-09	3.25360583370085e-07
C05C10.3	-0.463999107962641	5.98608159828762e-09	3.28800451777847e-07
F29B9.8	-0.439376600201183	6.62364222585117e-09	3.62724214783735e-07
aly-1	0.565273415582305	6.85092364677502e-09	3.74043972438489e-07
R02C2.1	0.811208563483633	7.24609557440143e-09	3.94434921072432e-07
F28H7.3	-0.724341179953817	7.62889713946064e-09	4.14032772813534e-07
cal-5	-0.774276138556468	7.77512360564683e-09	4.20712863911503e-07
cyp-35C1	-0.812769265957207	7.87888076238587e-09	4.25062110210497e-07
act-5	-0.740309182382422	7.91783844130342e-09	4.25900061246561e-07
dhs-3	-0.633168539041739	8.1485750098449e-09	4.37018413728584e-07
qdpr-1	-0.513225494571702	8.84803399092024e-09	4.73135605849767e-07
C39E9.8	0.628089740262759	9.14457753653496e-09	4.87558839271971e-07
grd-13	-1.59595417941941	9.62050470018326e-09	5.11433906298339e-07
fbxc-26	0.997263278586363	1.06029638283984e-08	5.62018907767089e-07
F28B4.3	-0.556879055948254	1.10189572773747e-08	5.82371111220785e-07
clec-41	0.745636295316327	1.16479977145807e-08	6.13832598402294e-07
col-179	-1.05813762380745	1.19679173505695e-08	6.28869090608969e-07
C28G1.10	0.705537327874028	1.24259290072853e-08	6.51054222713125e-07
C05G5.1	-0.8155733798772	1.27513381164496e-08	6.66184133032098e-07
ZC204.12	1.14997206959175	1.34851388059984e-08	7.02502316996724e-07
F21A3.11	0.833412764541893	1.37327959100587e-08	7.13359892687936e-07
K10C2.8	-0.945819009143427	1.44815532018953e-08	7.5011144946911e-07
nas-20	-1.10293065196059	1.45513288352029e-08	7.51584402138705e-07
F27D9.2	0.651666057140542	1.49939546982847e-08	7.72252380650182e-07
K04A8.21	5.08815066613293	1.54358290528243e-08	7.92764994376833e-07
K01F9.2	1.05223971254517	1.55790084179127e-08	7.97864653650904e-07
Y71A12B.11	0.825932347247426	1.6480484775257e-08	8.41662060952098e-07
pyk-1	-0.234534295086764	1.66172887798286e-08	8.46271505059003e-07
gst-30	1.11153616136374	1.68502411640854e-08	8.55738085486696e-07
T01D1.3	-0.932409912797495	1.7403597823653e-08	8.81378306495365e-07
Y43C5A.7	-1.57787469366678	1.78247184024613e-08	9.0019779243097e-07
kdp-1	-0.279906283623037	1.91610534186221e-08	9.6500585098052e-07
sri-39	4.56241416445478	1.94006412324234e-08	9.74373089079253e-07
col-122	-0.792118504453164	2.0773322463051e-08	1.04044015344554e-06
vha-3	-0.451836031465788	2.14242082976988e-08	1.06917197341354e-06
F21C10.11	1.43442512031514	2.14645932729742e-08	1.06917197341354e-06
col-8	-0.809874588565397	2.22888469710407e-08	1.107195428362e-06
Y51H7C.1	-1.15970521692415	2.24761556622415e-08	1.11345772777987e-06
Y7A5A.1	-0.493210061789307	2.25384679919955e-08	1.11351056131106e-06
T13F3.6	-1.08971368485268	2.33583435138269e-08	1.15088900657151e-06
hsp-16.48	5.58086233017931	2.37815514277896e-08	1.16857401759093e-06
T05B11.1	0.794965986117492	2.40395929369583e-08	1.17806964740388e-06
T11G6.3	0.682712034967991	2.49711116174679e-08	1.22009725597377e-06
sdz-9	0.82557916000191	2.50314216202748e-08	1.22009725597377e-06
F14B6.3	0.659881243947257	2.51133724255748e-08	1.22081878093416e-06
srh-237	0.839405138624368	2.54180667432685e-08	1.23233565722497e-06
col-160	-0.989433516377299	2.57661310361401e-08	1.24588837331932e-06
Y49E10.29	-0.626765795479619	2.68915940099663e-08	1.29685960396604e-06
mup-4	-0.830430205534509	2.70606301564667e-08	1.30155903935111e-06
Y17G7B.8	0.600283299617457	2.76646736330295e-08	1.3271014019053e-06
F17A9.5	-0.72805063170469	3.02648956505279e-08	1.44801596795328e-06
ghi-1	1.04278615780572	3.04892182271598e-08	1.45491988605772e-06
cest-25	0.522202614563437	3.33528114999916e-08	1.58740174314489e-06
gpx-5	-0.641388055598871	3.34563608976113e-08	1.58817257827538e-06
grl-22	-1.07142846742534	3.40602007209451e-08	1.61262632632162e-06
Y45G5AM.5	0.83503540622641	3.59613274876586e-08	1.69821531182629e-06
T16G1.6	0.862499890607322	3.70581345142633e-08	1.74547653783373e-06
trap-2	-0.390457198546823	3.79706292513392e-08	1.78383465224444e-06
Y51A2D.18	-0.663309597573659	3.92672808478451e-08	1.8399959615842e-06
klp-20	-0.370354863933123	3.98649973917144e-08	1.86320184467548e-06
trpp-12	-0.502089244701853	4.05336646828056e-08	1.88959630153356e-06
ifo-1	0.977754445404333	4.06804297472487e-08	1.89158796223716e-06
ttr-44	-0.758432736052805	4.18738756857899e-08	1.94211462715139e-06
ZK1055.7	0.627994054430068	4.25430613065587e-08	1.96813078273421e-06
K09C8.7	2.97578723927091	4.40621770132159e-08	2.03323461999309e-06
col-96	-0.862100088833074	4.44092432520948e-08	2.04406190269958e-06
cdr-6	-0.401586149926258	4.50203213624088e-08	2.06695571386352e-06
sdha-1	-0.366955510507059	4.51404757890214e-08	2.06725186478639e-06
VB0395L.1	-1.12017435700713	4.54889309577848e-08	2.07797551191831e-06
W07G4.5	0.705035524929226	4.58138278629877e-08	2.08757194079443e-06
tsp-1	2.63620703015459	4.76076576508657e-08	2.16388705937597e-06
pin-2	0.55888754529066	4.93993518338372e-08	2.23972472740896e-06
rhr-1	-0.487515319970695	4.97449737224768e-08	2.24978449564266e-06
unc-97	-0.511628351592341	5.03952448311932e-08	2.27149436577982e-06
C06G3.3	1.30448889089003	5.04748761770556e-08	2.27149436577982e-06
fbxa-4	0.947818926628344	5.15161639044496e-08	2.31263055789333e-06
C25F9.11	3.99351165001758	5.23360748954686e-08	2.34365068392738e-06
pqm-1	0.800997838258034	5.27895072762356e-08	2.35814749825366e-06
ptr-24	-0.515701899319526	5.35481154767831e-08	2.38617227324361e-06
dod-17	1.29183899024828	5.43152802275205e-08	2.41444036629963e-06
Y48A6B.7	0.509682437274329	5.61535616321745e-08	2.48950365158402e-06
fat-6	1.05438426424147	5.62777625433711e-08	2.48950365158402e-06
sur-5	0.660803943174645	5.70262853864522e-08	2.51649246264827e-06
clec-5	0.64986791777101	5.72747294150493e-08	2.52133621185233e-06
nhx-2	-0.615289306669812	6.74123185636661e-08	2.96044290774399e-06
F13H8.3	-0.688214057041117	6.80949870118765e-08	2.9832167683444e-06
C35B8.3	0.453907731770501	7.08939624719968e-08	3.0983729127485e-06
Y45F10C.4	-0.765464005134893	7.10863155458123e-08	3.09932926364128e-06
adt-2	-0.671919982259181	7.13238433462586e-08	3.10224592315389e-06
col-178	-0.707807514590609	7.25129998323155e-08	3.14644116933491e-06
clec-218	0.596040279787275	7.5493998214968e-08	3.26799138463413e-06
T10B11.5	0.594131418935776	7.6129972623898e-08	3.28769366336126e-06
R11A5.3	0.805162766862907	7.68350395994669e-08	3.31027927715144e-06
maa-1	0.438544561585942	8.36384858861696e-08	3.59487307776938e-06
haf-9	0.770318255149405	8.44861637755146e-08	3.62274279151564e-06
C43C3.4	1.36442095189157	8.75127584898722e-08	3.74369285201027e-06
fbxc-18	0.904964136310835	8.88802743790519e-08	3.79326823588155e-06
eef-1A.2	0.673626634533192	8.91153608290522e-08	3.79439432138876e-06
vha-10	-0.32589337538696	9.07523575148983e-08	3.85506685041674e-06
doxa-1	-0.869928513690743	9.3571003864846e-08	3.96553478150761e-06
T19H5.4	0.346060821413816	9.43342894085419e-08	3.98858538543419e-06
spp-4	-0.531754481998451	9.8689595122482e-08	4.16305227128039e-06
gly-14	0.607131877178817	1.02240144184442e-07	4.30284273476237e-06
F10A3.4	-0.915028340957723	1.12267876509932e-07	4.7139544176145e-06
tmem-135	0.577705260474909	1.14722939326283e-07	4.80593953891971e-06
vha-14	-0.279057648541674	1.16019708642695e-07	4.84909039731685e-06
T24A6.20	-0.479736966561914	1.16833652494135e-07	4.87190971558684e-06
oac-6	1.19799458703745	1.17540780890919e-07	4.89018063473179e-06
F35E12.4	2.41341429085388	1.18682851944584e-07	4.92642221736182e-06
Y39B6A.41	-0.820203047056496	1.20258612423494e-07	4.98045975506045e-06
fbxc-25	1.02506583293804	1.24675497641652e-07	5.14681069450943e-06
cyp-14A5	0.728638345816312	1.24841511263333e-07	5.14681069450943e-06
fgt-1	-0.412713718011306	1.29391474380367e-07	5.32232216223859e-06
Y51B9A.9	1.23959562673864	1.32096260136815e-07	5.42131400800774e-06
cox-6C	-0.400487088727842	1.33128628592282e-07	5.45137746945107e-06
K12C11.7	0.736589303714233	1.34832380020573e-07	5.50873595764952e-06
F56H9.2	0.55797681785615	1.3880753178079e-07	5.65842989979047e-06
F08B12.4	0.802925507038336	1.45944308057631e-07	5.93604801967739e-06
R10H1.1	0.473731658257668	1.46363563762625e-07	5.93981239457206e-06
F54D5.4	0.430206250023519	1.4838019246375e-07	6.00824115631054e-06
Y54G11A.7	-0.570133952573545	1.49202893134004e-07	6.0281284445985e-06
K08D12.6	-1.08314690231236	1.49998723107225e-07	6.04684431222276e-06
pud-3	-2.37642259954329	1.5350970532229e-07	6.1746901603198e-06
aakg-3	-1.01163919546429	1.60631542602998e-07	6.44689200014373e-06
stdh-1	-0.272571985780687	1.62654317740618e-07	6.51369636749378e-06
rbm-3.1	-0.541622465017311	1.63028995425339e-07	6.514352012809e-06
btb-9	0.919457228874349	1.66236496794795e-07	6.62535186780883e-06
K09A9.6	-0.678956017506907	1.66535713304474e-07	6.62535186780883e-06
ttr-31	-0.799368793376402	1.70879405668492e-07	6.77519657401232e-06
dhs-21	0.630494117774552	1.7104753465e-07	6.77519657401232e-06
Y55F3BR.11	0.795212292901819	1.72967462682884e-07	6.83635095442936e-06
ugt-26	1.48792155886766	1.76689935790809e-07	6.96832911629652e-06
cah-5	-0.409531809077814	1.7767202803146e-07	6.99189424597397e-06
pud-1.2	-2.03795797662284	1.802694167887e-07	7.07878675299211e-06
cest-33	-0.373006474828782	1.80790372500409e-07	7.08394345351279e-06
fozi-1	0.878640315268676	1.90171812168212e-07	7.42555880383648e-06
cyp-34A2	-1.35454639668131	1.90325636795985e-07	7.42555880383648e-06
rncs-1	1.13242375249697	1.94505331093289e-07	7.5723799242122e-06
skr-12	0.797324030142065	2.0115597452135e-07	7.81456575378774e-06
F16H6.10	0.6921599238182	2.08513377660887e-07	8.08311667218035e-06
mfsd-13.2	-0.458424341011277	2.11367306903596e-07	8.17631703577507e-06
Y48G1BR.1	-0.598302542007245	2.12909971432521e-07	8.21850571255769e-06
F29B9.5	0.859159311481563	2.14960235192788e-07	8.28006787296628e-06
alh-9	-0.412064240539893	2.16037315439372e-07	8.29274300657216e-06
C33B4.2	-2.69087766122962	2.16201539250603e-07	8.29274300657216e-06
hsp-16.1	4.06562436829613	2.31401119193563e-07	8.85706052222772e-06
C40H1.8	1.12882289047202	2.33580801062287e-07	8.92170702544841e-06
Y39B6A.7	-1.08972280942289	2.43232838207193e-07	9.2708935669706e-06
T01D3.6	0.587110235881537	2.45939257265343e-07	9.35443856975147e-06
H43E16.1	1.08895501743751	2.52816928466476e-07	9.59595944978914e-06
cyp-33C4	0.497114829355708	2.55311799890843e-07	9.67046632044877e-06
sox-4	0.620771790335503	2.55946781945416e-07	9.67436266642331e-06
unc-52	-0.755651172621723	2.62695458272275e-07	9.89292360593463e-06
pqn-89	0.678287618038944	2.6281734237206e-07	9.89292360593463e-06
C05C12.4	0.493011738046038	2.67620583527702e-07	1.00529128700767e-05
btb-8	0.942942825087145	2.69995217309776e-07	1.01212021565135e-05
ifas-2	2.02822539115796	2.82572783165872e-07	1.05571778715671e-05
gpi-1	-0.211400004373571	2.82786734692986e-07	1.05571778715671e-05
R05G6.10	0.686182063544115	2.94244817167495e-07	1.09624283215619e-05
fbxa-54	0.854084387147701	3.08934903544847e-07	1.1486187078423e-05
acp-7	-0.644079414685307	3.20920817599233e-07	1.19074722138197e-05
C13B9.2	0.382949310713914	3.30865824066739e-07	1.22514695465527e-05
nhr-137	-0.602019600997222	3.38154595338374e-07	1.24959119874939e-05
F48C1.9	2.14431047190042	3.39653797174492e-07	1.25258533193295e-05
Y22D7AL.10	-0.29578000793463	3.41194719200491e-07	1.25572088862027e-05
ech-6	-0.30666412200899	3.54062828636584e-07	1.30044773483671e-05
fbp-1	-0.244029033291227	3.55279495258901e-07	1.30228558534316e-05
cest-8	0.962816287405874	3.63435897056223e-07	1.32950262462358e-05
gst-10	-0.804405243320379	3.67968128270434e-07	1.34337922491662e-05
drd-5	-0.583128592242588	3.78881800567587e-07	1.38045090503393e-05
T04F8.8	-0.75335427154885	3.84139636524316e-07	1.39680854632972e-05
C18D11.6	2.2353342835413	3.89928315858987e-07	1.41337676210645e-05
fbxb-40	0.965142246902821	3.90250885307431e-07	1.41337676210645e-05
C25G4.2	0.395031573258044	3.94717246925491e-07	1.42640366769974e-05
vha-9	-0.223258679345805	3.95416890446438e-07	1.42640366769974e-05
C17H12.6	1.34402918112217	4.15700607607011e-07	1.49410628203345e-05
T12B5.14	-1.44384918345928	4.15828490571986e-07	1.49410628203345e-05
ztf-20	0.316123146876391	4.31927765937528e-07	1.54889126479491e-05
M05D6.3	2.1434326919497	4.48118270602672e-07	1.60378706256441e-05
tsp-10	-0.473531645692712	4.70432121149777e-07	1.68033917379648e-05
pat-2	-0.68867043957998	4.88462033864428e-07	1.74131926229199e-05
nlp-27	-1.04760930923157	5.12728338333707e-07	1.82424929926519e-05
M03A1.8	1.28564194605003	5.92417442369781e-07	2.10366045307129e-05
kmo-1	-0.754007500718028	5.99537820310625e-07	2.12253930439199e-05
T02C5.1	0.405511946778049	6.00068864450516e-07	2.12253930439199e-05
nra-4	-0.207683147339689	6.01443755090556e-07	2.12327163326241e-05
scav-6	-0.646512733335234	6.09993305433603e-07	2.14928067559851e-05
K12H4.5	-0.260512847422641	6.27528143524464e-07	2.20678707493584e-05
ugt-65	-1.22884834890414	6.34351839678287e-07	2.2264769878747e-05
T24C2.5	0.658146571021006	6.40957433583467e-07	2.24532699421599e-05
aqp-9	-0.496808904028704	6.42785831160128e-07	2.24740176852352e-05
yop-1	-0.274700423098682	6.60328104869589e-07	2.30430427536161e-05
nhr-136	-0.626228655844294	6.62565922745511e-07	2.30768410755482e-05
T16G1.5	1.86194039180484	6.6397430240466e-07	2.30816764665758e-05
B0272.3	-0.267446766913038	6.77711230052429e-07	2.35142516671435e-05
F48D6.4	0.713969498000244	6.93479535496226e-07	2.40155265425845e-05
C45B2.1	-1.18198588585942	7.20979034755008e-07	2.49203799066175e-05
T26H5.9	2.08534004275448	7.43876582950719e-07	2.56630363465409e-05
vdac-1	-0.283216049024548	7.61107114175001e-07	2.62077432629085e-05
F47G3.1	-0.783400830618602	7.86731938381658e-07	2.70388910618467e-05
F41G4.8	0.540337372600352	8.10469377385231e-07	2.78007777524128e-05
C18B2.3	-0.916241575573933	8.11958252380571e-07	2.78007777524128e-05
clec-97	-0.637871362875692	8.26410688968021e-07	2.8242429955127e-05
R03H10.12	1.04172549648828	8.72722366798567e-07	2.97691657612847e-05
dct-18	-0.512712405254103	8.88445516545766e-07	3.02487414537801e-05
F27E5.9	1.38816085035981	9.04792949679167e-07	3.07477394731158e-05
gst-22	0.945752881591572	9.67118280569875e-07	3.27989689777507e-05
fbxb-104	0.762856894281429	9.68761143009302e-07	3.27989689777507e-05
AC3.5	-0.858951345757924	9.72143320052955e-07	3.28523005611204e-05
lact-4	0.796609167798169	9.77712842376328e-07	3.29792155607496e-05
pmt-1	0.502244696571547	9.91273674680502e-07	3.33747160729004e-05
efsc-1	0.272246913847147	1.01305090485418e-06	3.40448770816153e-05
crn-6	0.50562348616781	1.02701851769313e-06	3.44505971774517e-05
gfi-1	-0.796567754619123	1.03058430819703e-06	3.45065438440702e-05
Y105C5A.8	0.622769705996357	1.04482994481157e-06	3.49192154901088e-05
glb-15	-1.16889247200716	1.05489967418836e-06	3.51910660117773e-05
ncr-1	0.836624163474063	1.07271109381669e-06	3.56584377053445e-05
fip-5	-0.96289353615176	1.0728323758222e-06	3.56584377053445e-05
aqp-7	-0.618626388143964	1.08069569895291e-06	3.58542490924506e-05
C52G5.2	-0.847198545385551	1.09195444926081e-06	3.6141295278535e-05
Y54G2A.52	0.663359824252927	1.09332338172786e-06	3.6141295278535e-05
K05F6.15	0.924144448995283	1.09888655651706e-06	3.62592676661283e-05
F18E3.11	-0.77165135014077	1.11445222694693e-06	3.67062607574676e-05
phb-1	-0.321215069603817	1.11938710991311e-06	3.68021284725683e-05
tent-5	0.41115200840621	1.13523484782418e-06	3.72557847803095e-05
cest-28	-0.83851642874259	1.16153372922762e-06	3.80501706866441e-05
W09G12.7	1.7486242385078	1.19124310302967e-06	3.89532209643569e-05
ctl-1	0.661877296054786	1.20668074826382e-06	3.93871861475484e-05
cyp-42A1	0.631002327053544	1.23484574946556e-06	4.02342841774792e-05
C33H5.13	0.727394405418576	1.23852942523801e-06	4.02821171381973e-05
spp-2	0.610197554902529	1.2478438108774e-06	4.05125862956465e-05
Y16B4A.2	-0.741746205562876	1.27778554057413e-06	4.14107289004962e-05
ugt-24	1.10718272353123	1.28478433747021e-06	4.14973504451823e-05
pgp-14	-1.11709987778996	1.28502328258279e-06	4.14973504451823e-05
T18D3.9	-0.65267484673865	1.28953149096311e-06	4.15690993567381e-05
K05F6.4	0.755757265541719	1.30832924046049e-06	4.21004140191366e-05
ZK822.9	2.32699309396558	1.34720798605184e-06	4.32748911561989e-05
W02H3.1	-0.585891461080869	1.35420991194107e-06	4.34230871410946e-05
fbxb-24	0.771285085854496	1.37671915364339e-06	4.40671319232226e-05
F55B11.4	0.433580016285954	1.44923974130423e-06	4.6306902876366e-05
sdz-29	0.717283698079687	1.45613819300704e-06	4.64456991001069e-05
pgp-7	2.55191058923109	1.53440782976866e-06	4.88565127023189e-05
lea-1	0.859932714711624	1.56236558269233e-06	4.96597354177084e-05
W01A8.6	-0.885846302539274	1.56967639530276e-06	4.98050375968576e-05
skr-10	0.69463498353323	1.57453381574705e-06	4.98721242231657e-05
cps-6	0.309619590465556	1.62030150276205e-06	5.12325245595075e-05
nac-2	0.393563246329237	1.66925264032229e-06	5.26886844682283e-05
K06A4.15	1.12578618841192	1.69117131838192e-06	5.32880168795522e-05
R13A5.10	-1.16699318658915	1.71895327447464e-06	5.40697049882758e-05
F53F1.4	-1.24373215633527	1.75078467608201e-06	5.49758483520674e-05
trap-4	-0.338958934106523	1.76988894175231e-06	5.54799152586185e-05
clec-70	-0.901666826898317	1.79673951093346e-06	5.62246489643395e-05
fust-1	-0.424578744963484	1.80506201783502e-06	5.63880284299973e-05
F19B10.14	1.87706931333667	1.94090190677302e-06	6.05275086913213e-05
Y39G10AR.32	-0.348778167310992	1.95300795600456e-06	6.08007493974638e-05
fah-1	-0.34051498725072	1.96550879488883e-06	6.10853254698699e-05
cpd-2	-0.440428051751675	2.00794307840554e-06	6.22976332909406e-05
C18D4.8	0.737515444979985	2.03547106112342e-06	6.30441215711837e-05
F09C6.3	2.24614977743613	2.07976330804237e-06	6.43064229651673e-05
unc-68	-0.498964289152798	2.09157113600327e-06	6.45617229603996e-05
slc-17.5	0.758175600670176	2.11175956645185e-06	6.50744079282393e-05
F47F2.1	-0.67702622469931	2.133656821103e-06	6.56379266742363e-05
T05E7.4	1.47791975504535	2.16938285145131e-06	6.66242392267503e-05
fbxb-84	0.668157988821454	2.1858487677417e-06	6.7016722506428e-05
nhr-57	0.894179066846628	2.23388645947674e-06	6.82777520011282e-05
T25B9.9	-0.225917363583891	2.2344899862863e-06	6.82777520011282e-05
ugt-63	1.15500199969492	2.27230392305905e-06	6.93167074247258e-05
K07C11.8	-0.742472937481869	2.33828738827481e-06	7.12100552868078e-05
F53B2.8	2.15878618938622	2.38617717510758e-06	7.25469685963728e-05
sdz-16	0.831307949878073	2.40097406153211e-06	7.28749739778218e-05
cpz-1	-0.41517742594078	2.41324353450707e-06	7.31253011681216e-05
tpi-1	-0.199884450197574	2.47536770112397e-06	7.48829620201913e-05
chil-25	0.931584574706755	2.57062916041826e-06	7.76355627334957e-05
EGAP9.3	-0.649944372560234	2.58615866426199e-06	7.78151364436589e-05
aqp-4	-0.522108554915803	2.58704414508063e-06	7.78151364436589e-05
mccc-1	-0.265164535574214	2.58941518884625e-06	7.78151364436589e-05
K08D12.3	-0.435254362268523	2.65044521820613e-06	7.9517730218161e-05
C08B11.9	-0.226219987912669	2.65541339531531e-06	7.95355369690735e-05
fat-2	0.481376600032337	2.66788613960098e-06	7.97776939211932e-05
ZK1240.2	0.413848901204154	2.71310750732367e-06	8.09967283918745e-05
sdz-33	0.731922851219657	2.73345491396467e-06	8.14703996570356e-05
F55G11.8	0.521653942976254	2.78789135583948e-06	8.29568784623855e-05
swt-7	0.348250261879473	2.80529475293663e-06	8.33383397110145e-05
Y48C3A.5	0.6839099365366	2.83121117878116e-06	8.39710447657752e-05
ZK593.3	0.773678822808097	2.91125118748901e-06	8.62043287292146e-05
T04F8.2	-0.231734847601581	2.98864638589598e-06	8.83521625072762e-05
C04C11.25	1.90854533983296	3.06535725469953e-06	9.03831867599971e-05
unc-64	0.428005874531493	3.06729147081669e-06	9.03831867599971e-05
C18E9.4	-0.259421379548758	3.12512987208562e-06	9.1938489003865e-05
ipgm-1	-0.207863554025099	3.16438824496296e-06	9.29430414889686e-05
Y116A8C.29	0.647488007601901	3.19090113238172e-06	9.3570602399729e-05
dmsr-2	0.71409059246253	3.21946488355467e-06	9.42561852623309e-05
crp-1	0.543098384461463	3.25887858853007e-06	9.51976842085461e-05
adsl-1	-0.289540945545113	3.2620954437008e-06	9.51976842085461e-05
lipl-3	1.24265866519147	3.29158867547709e-06	9.59044450462322e-05
hxk-3	0.180581831789038	3.32365031131016e-06	9.6683658095888e-05
homt-1	0.23793074195857	3.39260699160277e-06	9.85319292561182e-05
K04A8.20	2.06277747528539	3.48083896088199e-06	0.000100933226710997
Y40C7B.4	2.24450891094629	3.5022028890182e-06	0.000101391004339554
C31C9.2	0.711305313550801	3.53212530560495e-06	0.000102052015816948
nlp-36	-0.359402046381599	3.53626147982383e-06	0.000102052015816948
F34D6.1	0.703251813325424	3.55591760332397e-06	0.000102456636998468
sdz-14	0.625045910656058	3.62912657914517e-06	0.000104400554328225
F47G3.3	-0.295643764613429	3.64105651366807e-06	0.00010457827563191
glt-1	-0.581326146203191	3.69071761096702e-06	0.00010583743988169
B0348.2	1.82582162606937	3.7011273785039e-06	0.000105968813966267
F55C9.5	1.09060011660048	3.70705397599283e-06	0.000105971616882902
K10D6.4	0.459989965399831	3.72335042899742e-06	0.00010627038328038
F55G1.15	0.664736206029754	3.7365937118691e-06	0.000106434897771824
Y43C5A.3	0.721622583214608	3.74082281921762e-06	0.000106434897771824
F21D5.3	-0.51762271642413	3.7816130353055e-06	0.000107427354054514
ver-4	-1.18102646744758	3.89345335321086e-06	0.000110331228387091
C06E4.6	2.55318898890781	3.89597099304286e-06	0.000110331228387091
C51E3.10	0.571508818646511	3.90370085485338e-06	0.000110378204109003
gst-28	-0.596616247651494	4.07503758119813e-06	0.000115043879291558
ugt-43	1.20864912482414	4.09230544367696e-06	0.000115352256234869
sdz-30	0.734865093641426	4.22161876220844e-06	0.000118813081603269
endu-1	0.403456966205916	4.30269740961327e-06	0.000120907792278484
vha-19	-0.227282191074993	4.33297430898876e-06	0.000121570688135377
str-168	-1.11313274515334	4.34918303567548e-06	0.000121837437244401
T27E9.2	-0.35748564495933	4.36981416255959e-06	0.000122135279240359
Y43B11AL.1	0.710118258862677	4.37325046947219e-06	0.000122135279240359
Y75B8A.24	-0.34492241167352	4.38485597142621e-06	0.000122271574258436
cec-8	0.665335555938978	4.39203378160568e-06	0.000122284174859683
F54D5.12	-0.254533005366091	4.42546577087671e-06	0.000123026595076926
pud-1.1	-1.76328071154485	4.4755385570862e-06	0.000124228651154785
skr-8	0.677528572445332	4.53447566166047e-06	0.000125619726043395
Y104H12D.2	0.238717348898016	4.54190997667086e-06	0.000125619726043395
F11E6.3	-0.859449089357895	4.55046405048169e-06	0.000125619726043395
gas-1	-0.359206976806281	4.55329186857693e-06	0.000125619726043395
fbxb-91	0.721204803337379	4.65749125988014e-06	0.00012829977059982
fbxa-6	0.838203338660374	4.66509082261669e-06	0.000128314699313153
nspe-5	1.97194324392509	4.70392476072405e-06	0.000129187395883269
F49F1.7	0.881280950643136	4.74206851749191e-06	0.000130038533509081
col-20	-0.745405684940634	4.80417793896433e-06	0.000131470291237967
gly-12	-0.294279325723491	4.80874229543192e-06	0.000131470291237967
B0462.4	2.09650543537215	4.90101107598083e-06	0.000133791715273885
K03H1.11	0.283413696617922	5.07974312453969e-06	0.00013846298312932
fbxc-21	1.01080342657857	5.10330578747362e-06	0.00013889700976356
cpz-2	0.456314691839038	5.14553084505234e-06	0.000139663159139954
srw-86	4.16654625265242	5.14681902116326e-06	0.000139663159139954
T05D4.2	0.598688649716542	5.1732412548673e-06	0.000140170937786501
D2007.1	0.405402448987737	5.20316408189348e-06	0.000140771913947776
Y39H10B.2	0.501402058501112	5.26573697100807e-06	0.000142253140965673
puf-9	0.281682661906535	5.30859277880156e-06	0.00014319810877061
galt-1	-1.18984931053777	5.36576045818785e-06	0.000144525764281946
srsx-25	0.808184372839879	5.37984994634714e-06	0.000144690905139848
jmjc-1	0.514120153371581	5.39850975795535e-06	0.000144978295287129
Y37D8A.3	-0.507637934394959	5.44826026374642e-06	0.000146098554358663
misc-1	-0.14145501166693	5.51569508758049e-06	0.0001475420860613
nas-37	0.689357528947238	5.51832234319807e-06	0.0001475420860613
fbxb-41	0.720841936875054	5.55564379455091e-06	0.000148278096528784
mca-2	-0.50348525497422	5.56216169807109e-06	0.000148278096528784
hmit-1.3	-0.371301652003292	5.72341365931666e-06	0.0001523534168961
dim-1	-0.722752950321972	5.76099389561717e-06	0.000153129576047099
R09E12.9	-0.807631762570227	5.77052025784338e-06	0.000153158874172044
linc-7	-1.2052114856624	5.80353366580445e-06	0.000153676367031391
K11D12.12	0.325936109271965	5.80692283980891e-06	0.000153676367031391
fbxb-22	0.948920218465315	5.90126893722386e-06	0.000155946178121609
F56D5.6	0.50458274356612	6.03916922688858e-06	0.00015935868753855
T04C12.8	0.790815802309474	6.10904501862938e-06	0.000160968909396668
F23H12.3	0.468788067714725	6.16203453830019e-06	0.000162130173575739
C25A11.10	-0.355552850449503	6.2806611759529e-06	0.000165012573468208
ZK829.7	-0.149174519050751	6.29366313908649e-06	0.000165115569309858
F49F1.5	1.63195926020587	6.37823032856957e-06	0.000167023707046727
ifb-1	-0.541839334193766	6.38476851644437e-06	0.000167023707046727
ceh-60	0.595815207802286	6.43592376318675e-06	0.000167866416246786
linc-72	-1.22058465869382	6.43928715660851e-06	0.000167866416246786
W04G3.5	-0.254562207374627	6.44468173039197e-06	0.000167866416246786
fbxa-63	0.929196362207863	6.51107640457138e-06	0.000169244481134139
F16G10.15	1.70776826618743	6.51620575292325e-06	0.000169244481134139
mpk-1	-0.267207963694931	6.52596464416321e-06	0.000169256152918019
F35C12.3	-0.895417858740162	6.5357119702546e-06	0.000169267491924785
C49G7.7	3.1218448210001	6.58175461584536e-06	0.000170217468948342
tram-1	-0.191701817652311	6.70640248006927e-06	0.000173194749275766
C10A4.1	0.858723773777439	6.74327675258567e-06	0.000173900020764199
F36G3.2	-0.422160286048165	6.82608293529918e-06	0.000175786138593023
suox-1	-0.304895766660185	6.89955996180685e-06	0.000177427015085729
glt-5	0.59033773540673	6.94804358012153e-06	0.000178421441144336
arcp-1	-0.626539601989287	6.97974653147643e-06	0.000178979947310936
T12D8.5	1.62311228784746	6.98948146915816e-06	0.000178979947310936
T07D1.2	0.343483055478042	7.01879582398923e-06	0.000179477815577986
F42G4.5	0.569644851352662	7.06070444655904e-06	0.000180295881380463
nceh-1	0.520128844345451	7.15485342600955e-06	0.00018222174496213
ZK822.5	-0.463064877460953	7.15616995231072e-06	0.00018222174496213
skr-9	0.728506055492636	7.23095246605136e-06	0.000183868457042349
sdhd-1	-0.216618451590686	7.24153849328748e-06	0.000183880462774385
Y69H2.9	1.0240271638563	7.36544058665876e-06	0.000186765795405918
chil-23	1.45213793705526	7.49178260352288e-06	0.000189704873975835
F40G9.6	0.935663256360518	7.65449127342515e-06	0.000193555362784621
mif-2	-0.44312588213184	7.74338162979919e-06	0.000195531140849138
pho-13	-0.527162060086472	7.81042006332491e-06	0.000196769338962462
unc-85	-0.263094758711427	7.8140620829931e-06	0.000196769338962462
fbxb-116	0.908670893988827	7.83850268392863e-06	0.000197101462332359
tbb-6	1.05931165427478	7.85319864757681e-06	0.000197101462332359
ethe-1	0.512295581968032	7.85977450035533e-06	0.000197101462332359
C35B1.4	-0.654152988012135	7.95143547111032e-06	0.000199125410881896
ZC239.14	1.30251682647516	7.97366065072565e-06	0.000199407323646276
coq-5	-0.274318579670567	8.04003523247268e-06	0.000200791044727453
R08E5.1	0.790202663327287	8.12248497051753e-06	0.000202571878256487
aass-1	-0.474535373393781	8.21216573203246e-06	0.000204527924896003
Y53F4B.39	0.2806935377271	8.24769241944234e-06	0.000205131731707088
bath-25	2.27598839648216	8.30700212605935e-06	0.000206324597887821
ncs-2	0.384816845612108	8.32002704376471e-06	0.000206366182377471
acdh-9	-0.375784389681111	8.37008481791391e-06	0.000207324948330372
mct-6	-0.330681660915013	8.39390769382548e-06	0.00020763215752577
F18E9.3	-0.615293723195725	8.42766021991372e-06	0.000208183818557407
C14F11.4	-0.574523066123866	8.44795102486688e-06	0.000208401896313575
F53H8.3	0.441825046632293	8.79921328281837e-06	0.000216367165787483
snb-2	0.41958654601104	8.80316270199207e-06	0.000216367165787483
C43E11.9	-0.434678429453316	8.80653994184795e-06	0.000216367165787483
ZC21.3	-1.00823465807273	8.8371750305937e-06	0.000216664666082285
lgg-1	0.346900866418339	8.84248293455012e-06	0.000216664666082285
ate-1	0.1983439175014	8.92968729098113e-06	0.000218224908202841
F46A8.7	1.84697607379032	8.93016510108979e-06	0.000218224908202841
pals-19	0.948711738017287	9.0797117324535e-06	0.000221581528869446
irg-2	2.70544165456988	9.25772616905049e-06	0.00022562294836395
clec-7	0.540500181495995	9.4139463888499e-06	0.000229123104813494
dsl-2	0.61489953096866	9.43174658166436e-06	0.000229249444654064
F36F2.2	0.607043196292852	9.50115440268004e-06	0.000230628155133679
R12C12.9	-0.52308602268719	9.54463561689955e-06	0.000231374693534468
xtr-1	1.24849588815047	9.68895384936236e-06	0.000234560412696747
grsp-4	-0.710661727954868	9.70900912724364e-06	0.000234695549291906
linc-16	0.779948632892525	9.72035358983581e-06	0.000234695549291906
gba-1	0.328032691636079	9.74913109700391e-06	0.000235078186305873
C25H3.9	-0.228208343818216	9.82143038295884e-06	0.000236507848731887
clec-265	0.609768701324764	9.91385883862122e-06	0.000238417814212926
F56D5.4	-0.292442265719437	9.95710249924448e-06	0.000239141453816069
lgc-56	-0.247754659299931	1.00530262718913e-05	0.000241126742281339
Y22D7AR.14	-4.53499705863047	1.02766991032144e-05	0.000246166885896629
F33C8.4	-0.652300239035917	1.03190942521226e-05	0.000246857174470842
C37H5.14	-0.514318272848823	1.03374638353351e-05	0.000246971655703321
C08D8.1	0.905556475817695	1.06980894166351e-05	0.000255251920844939
gbh-2	0.621826794586367	1.08676285447606e-05	0.000258957214380461
lev-8	-0.699735453325272	1.09262238546959e-05	0.000260012664793489
col-124	-0.993058152138879	1.09545829480839e-05	0.000260346761541326
F53F4.12	-0.318504528848664	1.10069510885977e-05	0.000261249840393988
D1053.3	0.764618880625124	1.12228843719113e-05	0.000266027719381643
tbc-13	-0.248486397752661	1.13578926885908e-05	0.000268877404910506
mbf-1	0.35397125908731	1.13870622549149e-05	0.00026921739773291
F47B8.4	2.07160009782056	1.14229090053546e-05	0.000269714167047211
arrd-1	0.740984079584748	1.14461101014052e-05	0.000269876336203438
spop-1	0.172466425339761	1.1459464911119e-05	0.000269876336203438
tbx-43	0.884481297845956	1.16792111048637e-05	0.000274695649544018
W07A12.8	-1.09833564888985	1.17151455165012e-05	0.000275184832862413
R07E5.4	-1.09964469694102	1.19180452761265e-05	0.000279589653116459
btb-16	0.813001811364816	1.19582198544989e-05	0.000280170612338459
Y69A2AL.2	0.483886489165729	1.20095056827838e-05	0.000281010067977725
fbxb-111	0.869126642098385	1.2031865372507e-05	0.000281171393750063
ZK930.2	0.336631032385899	1.20774794073985e-05	0.000281875036079475
rhi-1	0.246723169554024	1.21013554045362e-05	0.00028207018283317
C26G2.2	-0.722059315169065	1.21541267755634e-05	0.000282937488996821
Y39G10AR.11	0.569769872114824	1.23571086491181e-05	0.000287294875127387
itx-1	0.528090525654257	1.27453968887361e-05	0.000295943883568469
T19C3.4	0.375224235226326	1.27921451602563e-05	0.000296650498926811
fbxa-87	1.47507686451626	1.28669781973873e-05	0.000298005771473502
F35B12.10	0.501831841585144	1.29738395238195e-05	0.000300098443234813
math-14	0.927572734611241	1.31138651276018e-05	0.000302951946486567
Y7A5A.2	0.969669267627953	1.34704513707716e-05	0.000310794766969541
cdr-4	0.797824033031246	1.35449161032017e-05	0.000312116754971243
sdz-5	0.790147187375631	1.36155175281751e-05	0.000313346486303482
F26F12.3	0.472872258252584	1.37755052447726e-05	0.000316627636985096
skr-19	0.367391252861481	1.40014420255903e-05	0.000321414415994011
skr-16	0.384202760755996	1.4125086806923e-05	0.000323811215703023
Y46H3A.5	1.90489577488999	1.4141472155998e-05	0.000323811215703023
K10C2.12	-1.068679609352	1.43672764528993e-05	0.000328567865648002
Y57G11C.22	0.531549366631531	1.48806835407351e-05	0.00033988154202777
pck-2	0.289382873625107	1.49692951411241e-05	0.000341476480502858
ttr-49	0.551194157348835	1.50451438453769e-05	0.00034217012621703
maea-1	0.330460116770638	1.50481921403272e-05	0.00034217012621703
col-52	3.02692087889299	1.5056163080888e-05	0.00034217012621703
ZK858.5	0.248892897673617	1.52092716510815e-05	0.000345218187126482
mak-2	0.342090760994533	1.52298166370422e-05	0.000345253486631003
dad-1	-0.219803937265025	1.52808203793631e-05	0.000345978325426154
W10G11.4	-1.87994468147099	1.56470959591818e-05	0.000353446976560999
Y37E11B.7	-0.947118069027274	1.56495691178485e-05	0.000353446976560999
C07A4.2	-1.10960059138009	1.57438455714868e-05	0.000355135057487843
sri-40	-0.334349151578059	1.57864584090767e-05	0.000355655019003004
mel-46	0.263485155532347	1.59219864310377e-05	0.000357929619748047
ZK896.1	0.819150558325332	1.59267951364705e-05	0.000357929619748047
C52E2.4	0.791423835036866	1.63366673305963e-05	0.000366687591034038
ech-7	0.595477835178529	1.63813608329783e-05	0.000367237387551639
Y69A2AR.18	-0.175202873061739	1.64710483599818e-05	0.000368793263833533
C15H9.9	-0.393400825822034	1.66697841750539e-05	0.000372783943526021
fbxa-30	2.37002095539623	1.66976991613648e-05	0.000372949469843701
pdhb-1	-0.219976040300719	1.67212507857165e-05	0.000373017252190321
W07E6.5	0.378845858838945	1.69462645983461e-05	0.000377573574341337
let-754	-0.288926665783582	1.69981335514482e-05	0.000378265686779534
21ur-8684	2.63641669355605	1.72336224194975e-05	0.000383037272871496
ncs-4	-0.74485153033861	1.73224852258232e-05	0.000384542251392785
acbp-1	-0.284306891161178	1.73781909693309e-05	0.000385308402455373
ttr-36	-0.423378761610318	1.75231261865383e-05	0.000388048668937214
fbxb-13	0.680944207897671	1.77223789214379e-05	0.000391983663224651
F01G10.9	-0.700554920500498	1.77901430402936e-05	0.000393004362837884
pnk-4	-0.382372882672771	1.81104895752179e-05	0.000399595644377471
cht-1	0.72733286335458	1.85020254548616e-05	0.000407739787630108
fbxc-28	0.60158072350456	1.85591055910796e-05	0.000408502540861282
T24C4.8	1.00719513976357	1.86110131467436e-05	0.000408828744717451
Y22D7AR.7	-1.22990054075658	1.86188988848826e-05	0.000408828744717451
Y15E3A.5	0.727444419814175	1.87725533924678e-05	0.000411705420058453
ugt-54	0.63493724970816	1.8835109362181e-05	0.000412579666643149
acs-12	-0.378167269810587	1.89722144784211e-05	0.000415082829641605
K09H9.5	-0.605514752873737	1.89997354815221e-05	0.000415185325468213
zip-5	0.841295597882733	1.93441915798179e-05	0.000422204978526613
R03H10.11	0.792034670387524	1.96778587884898e-05	0.000428972602678098
fbxc-36	0.480880352727164	1.98678797710402e-05	0.000432596313912913
ttr-18	-0.554500280289152	1.98927818782656e-05	0.000432620415465007
R04F11.2	-0.251637748963897	2.00517503406909e-05	0.000435556598499524
Y45G5AM.3	0.474857923395864	2.01171528125593e-05	0.00043645579389635
F01D5.2	-1.00158363417816	2.01929118400876e-05	0.000437577270756415
let-767	-0.287514587113008	2.03723411690786e-05	0.00044093992237502
lron-5	-0.717747951371835	2.04959545160766e-05	0.000443087929912947
T09F5.12	0.496686644085696	2.05862910630541e-05	0.000444512301445828
gpx-7	0.591182824400545	2.07927730163825e-05	0.000448438204283334
F57B1.1	-1.50014297223469	2.08536754460812e-05	0.000448982403005109
C25F9.14	0.78417581446221	2.0867396212492e-05	0.000448982403005109
F31D4.9	-0.277693104438632	2.09557949877914e-05	0.000450351428691531
fbxa-48	1.76447097689649	2.10490501043786e-05	0.000451821463928817
cest-13	-0.436877388604026	2.11566794739406e-05	0.000453596214051549
slc-17.4	-0.487278622713997	2.12286187577431e-05	0.000454602494269172
R193.2	-1.08308176379177	2.14130753456322e-05	0.000458013085716399
glct-6	0.58981968770107	2.14415704889976e-05	0.000458083658120407
acox-1.2	-0.628479850220938	2.15477943303814e-05	0.000459812733240216
tsp-2	1.71833860170194	2.19142605730144e-05	0.000467084609001144
mlp-1	-0.555067977704181	2.19874666233678e-05	0.000468096171755796
Y39G10AL.1	0.553019155932049	2.21747713202127e-05	0.000471531599266418
acox-1.5	0.628631468979448	2.24522119468589e-05	0.000476873440894674
cnc-4	1.52739690693931	2.2749145138172e-05	0.000481891048917373
R03H10.1	0.51862763372027	2.27511412842215e-05	0.000481891048917373
M28.8	0.551115529896077	2.27679671646237e-05	0.000481891048917373
pbo-5	-0.767871948155251	2.29034890317983e-05	0.00048419573731061
cni-1	-0.31254875782941	2.29494600887038e-05	0.000484248496199318
B0303.3	-0.184581718087844	2.29592543712564e-05	0.000484248496199318
cyn-7	-0.235072839682839	2.31933321292892e-05	0.000488618738635697
tli-1	0.35527230699957	2.34919468393013e-05	0.000493976389932465
ent-7	0.421531256657867	2.35019843403323e-05	0.000493976389932465
mul-1	1.03008324680973	2.36909057147823e-05	0.000497372236490134
21ur-3151	1.88714168918745	2.37353184149474e-05	0.000497729900925213
W04B5.3	0.365526115000016	2.41594885586159e-05	0.000506041084659212
ubq-2	-0.415809007199717	2.42598902546514e-05	0.000507559337997488
ketn-1	-0.538296308301126	2.45661715427472e-05	0.000512956341516837
fbxa-156	0.513976646179948	2.45791854563625e-05	0.000512956341516837
bath-1	0.339522375060431	2.46024932513438e-05	0.000512956341516837
ech-9	0.968286952921598	2.47796271340857e-05	0.000516057733018113
W04A8.9	0.903693503543511	2.48499300410233e-05	0.000516929723198908
tomm-22	-0.344189794572118	2.50214125460038e-05	0.000519902058855881
gst-20	-0.538817238353912	2.51719796633737e-05	0.000522433518561413
W08F4.3	-0.290419590655111	2.56575759416454e-05	0.000531904661567907
W10C8.5	-0.423760089439602	2.66015922775646e-05	0.000550846866968567
F36A2.3	0.419045074902821	2.69187746923765e-05	0.000556780708398291
frl-1	0.34560094471222	2.70261984715148e-05	0.00055836740273933
nrps-1	0.612596009613875	2.7200523571227e-05	0.000561331122642994
M05D6.5	0.343970650931067	2.73785262961462e-05	0.000564363930374415
arrd-22	-0.586502109599658	2.74960367994016e-05	0.000566144331879864
T25G12.13	-0.965256503036514	2.75902288634099e-05	0.000567441121001872
clec-10	-0.48905161114532	2.85396598269881e-05	0.000586304582276239
chil-22	0.581501799691311	2.8857500272535e-05	0.000592165025344196
nuo-6	-0.213874167124235	2.91682464683031e-05	0.000597866842209943
T04C12.11	-0.504602966744017	2.92261948665058e-05	0.000598380009986421
arf-1	-0.191086561386541	2.92934886887433e-05	0.000599083147187898
F59A7.2	0.840742205896256	2.9664919700563e-05	0.000605997646152738
Y39B6A.27	0.637008902661624	2.97106089848096e-05	0.000606249811394864
crb-3	0.600599655579161	3.05827926897733e-05	0.000623347257727318
snu-13	-0.412666077657387	3.07202386128174e-05	0.000625447545598694
col-116	-0.751133311628012	3.08683316990483e-05	0.000627759662886351
C50D2.7	0.163879258608136	3.10725639405723e-05	0.00063120702235033
ZC239.22	1.15158816507394	3.11852272502773e-05	0.000632766263786018
gem-4	0.631668971753725	3.12189284756646e-05	0.000632766263786018
sid-3	-0.27516497230853	3.13880869538484e-05	0.000635486424173628
F47D12.6	0.659838207536727	3.15776001809805e-05	0.00063861217896597
act-2	-0.324415580433303	3.16988042522654e-05	0.000640351066789375
mrp-6	-0.491534430652707	3.18088677687759e-05	0.000641861292901348
F42H10.3	-0.370720208046515	3.19200655793174e-05	0.000643252726943167
C42D8.1	0.50080190144072	3.19603930084501e-05	0.000643252726943167
nep-2	-0.465215348003012	3.1983964862033e-05	0.000643252726943167
pqn-37	-0.606033436636135	3.2168399954634e-05	0.000646247159751603
Y43B11AR.3	0.33589849331258	3.27737907955884e-05	0.000657682439795356
btb-14	-0.561290372136066	3.30854883139971e-05	0.000663205361672306
C46F11.5	0.210411734507097	3.34050087401917e-05	0.000668872757605095
btb-10	0.708353457282442	3.39745106225722e-05	0.000679527588150699
sul-3	-0.60626259300402	3.41462147020235e-05	0.000682211351096142
sgcb-1	-0.649832094599283	3.44931404109928e-05	0.000688386153471197
bath-24	0.49261670475208	3.46040227500547e-05	0.000689841817564412
T25G12.3	-0.541631536477323	3.4725038163019e-05	0.000691496077592387
W02D7.11	2.34617687286099	3.50833949698711e-05	0.00069786783801666
lin-18	-0.456101956516788	3.55754185619735e-05	0.00070688162281447
Y49G5A.1	-1.38878389734709	3.57153468256435e-05	0.000708887249603738
abf-2	1.22444918591827	3.57728266350838e-05	0.000709253828846738
T03F6.10	-0.826786985994142	3.61662361016327e-05	0.00071627269996055
C17E4.2	0.61180186273007	3.62092125334613e-05	0.000716343518031403
21ur-7394	3.1596426177964	3.65053945346127e-05	0.00072141801960195
tag-131	0.180613354001383	3.71520887142303e-05	0.000733400787093833
Y14H12A.5	1.24182303978652	3.79015654002035e-05	0.00074702267944739
Y49E10.21	0.322682098825121	3.7924312916228e-05	0.00074702267944739
epg-2	0.668655174744378	3.81227894370554e-05	0.000750119518133231
F29B9.11	-0.279046805779152	3.8343675802319e-05	0.000753650129472392
F13E6.1	0.284259498970157	3.85546393058445e-05	0.00075602006513538
F47B7.1	-0.427160173571274	3.85865332833334e-05	0.00075602006513538
hrg-10	0.518008721745138	3.85890006295381e-05	0.00075602006513538
F54C4.4	0.392974479773205	3.92495330569427e-05	0.000768133219061653
T17H7.1	-1.06175197614524	3.94479919615994e-05	0.00077118703425144
fbxb-61	0.750417348314525	3.9572377183677e-05	0.000772787743905941
F36D4.5	-0.223358877954516	3.98346602273597e-05	0.000777075061795738
Y73B6BL.23	-0.275489542347397	4.03760898439817e-05	0.000786792807559949
mdh-2	-0.231739015143578	4.04428803965427e-05	0.000787250544421353
ugt-17	0.422312591243307	4.06690677029769e-05	0.000790806759259704
rpl-24.1	-0.336032532581046	4.11129396043912e-05	0.00079858371255068
T08A9.6	-0.476785894879616	4.183968574021e-05	0.000811832792361535
set-23	-0.25011302732627	4.22194317346705e-05	0.000818327812759108
pals-18	0.616319156879697	4.25088419981028e-05	0.000823059910934513
ctsa-2	-0.606197080761996	4.31418647679076e-05	0.000833989259952792
twk-16	-0.785688107501614	4.31650565764027e-05	0.000833989259952792
nhr-161	-0.407565773982106	4.38687571553669e-05	0.00084668564102094
F54D12.8	-2.0509447724757	4.40615302160891e-05	0.00084950443357234
sepa-1	0.635533392709839	4.41309904620932e-05	0.000849942306770462
Y51B9A.8	2.77565343114026	4.42988273653371e-05	0.000852271936856291
C45G9.12	-1.10111385810902	4.43893970415921e-05	0.00085311165709639
fkb-2	-0.289075777028861	4.48586005682901e-05	0.000860089763611887
pud-2.1	-1.76468313016239	4.48846040996694e-05	0.000860089763611887
vwa-8	-0.455694088317804	4.48944054599682e-05	0.000860089763611887
tsp-8	-0.560349365978753	4.69031969503549e-05	0.000897628446057265
fbxb-75	0.758959015968214	4.71586341071564e-05	0.000901567956574353
col-155	-0.654662330267294	4.72138042463404e-05	0.000901674553574281
R04D3.3	-0.247029712774875	4.74523576689267e-05	0.000905279448875924
fbxc-23	0.789100084553806	4.80439743718454e-05	0.000915605343872665
twk-32	0.763637253890301	4.83121057893802e-05	0.000919751199326409
atz-1	0.623374711741729	4.89249611047081e-05	0.000930444265527927
pud-2.2	-1.64522007388496	4.93439981232789e-05	0.000937432842089168
slc-25A10	-0.341550810678972	4.94713199245267e-05	0.000938870634183529
hlh-11	0.387413167051925	4.98555114022591e-05	0.000945127215661567
btb-11	0.622176928546891	4.99049627102527e-05	0.000945127215661567
fbxc-58	1.8097076138855	5.00451483516478e-05	0.000946795881562237
cpr-4	0.626006782100849	5.06705079645329e-05	0.000957630462893112
C48B4.10	-0.466571719429474	5.12310930079445e-05	0.000966379731993491
fbxc-39	0.675199307376188	5.1239759179458e-05	0.000966379731993491
F09E10.7	-0.726103169570519	5.13266186268947e-05	0.000967014770213028
F07A11.5	-0.427540914057563	5.16832159492846e-05	0.000972725206184206
nol-58	-0.376687169570225	5.18106305505817e-05	0.000974114864570967
K02E10.7	-0.596556023774101	5.23949351908193e-05	0.000984082971801948
Y106G6D.2	0.668656876366193	5.28916732482872e-05	0.00099238752458938
cima-1	0.62776459753687	5.30493120212419e-05	0.000994319115317731
Y106G6D.1	0.589922028253281	5.43399568075794e-05	0.0010174611274136
F35F10.6	-0.893437398028654	5.44628037261478e-05	0.00101871217545792
Y51H4A.25	0.890060203388909	5.4997321277858e-05	0.00102678051600259
faah-3	0.365146674765794	5.50195366005374e-05	0.00102678051600259
nhr-53	-0.724268973761161	5.50635830318755e-05	0.00102678051600259
avr-15	-0.605862767307718	5.54342928554494e-05	0.00103263409672636
W01B11.6	0.671469249291801	5.57485843818473e-05	0.00103742580618871
ZK512.11	0.533627769952878	5.58499238446338e-05	0.00103824894214651
ndk-1	-0.387258510378642	5.60344052992068e-05	0.00104061442568425
ascc-1	0.233872510819746	5.63252676374791e-05	0.00104494866420103
T25E12.6	0.467336696652355	5.64661054789794e-05	0.00104649364292898
F10E9.12	0.855889531427298	5.67638421678223e-05	0.00105094034058368
col-143	-0.630428860634175	5.6875131934274e-05	0.00105095834919029
M79.2	-0.39932129325219	5.69218947617693e-05	0.00105095834919029
H20E11.3	0.618954836677435	5.69382307877691e-05	0.00105095834919029
21ur-199	2.0660743757134	5.71227537606066e-05	0.00105329491493062
unc-18	-0.251090806107611	5.74366333900767e-05	0.00105800955589157
trpa-2	0.656208154922737	5.8410252882348e-05	0.00107485506847568
F35F10.1	-0.710420528197661	5.85956476610507e-05	0.00107717641064263
Y45F10D.2	-1.79672595628592	5.87451330830549e-05	0.00107883360058891
C32F10.8	-0.214971733183897	5.91560372782397e-05	0.00108528346494014
bath-11	0.396681711113193	5.95271946098326e-05	0.00109099186008202
cyp-25A2	0.672422685603835	5.96955185109247e-05	0.00109297504737877
fbxa-98	0.576164195899188	6.02707483761694e-05	0.00110239685737136
math-34	0.971866502141792	6.09433954297983e-05	0.00111357977116499
zipt-13	-0.473645415566677	6.12000384677642e-05	0.00111588575826535
ztf-13	0.416337453982839	6.12118748454221e-05	0.00111588575826535
M02D8.5	-0.481356480216234	6.12537256888411e-05	0.00111588575826535
spn-4	-0.230715712355881	6.27739388617267e-05	0.00114185835124279
best-13	0.338480969800779	6.28050355449532e-05	0.00114185835124279
mex-6	-0.250625686245054	6.3694642194582e-05	0.00115672413047275
rpl-34	-0.378338554576253	6.37499355774543e-05	0.00115672413047275
ugt-6	-0.630473219183894	6.42827010131303e-05	0.00116522810281129
egl-6	-0.377389585143073	6.43612269220349e-05	0.00116548950863498
rsp-1	-0.293005470064812	6.48672057889803e-05	0.00117348325218851
lin-12	0.419188501323305	6.50685637261071e-05	0.00117595582217133
chhy-1	-0.415343533865869	6.54373367187881e-05	0.00118144609621081
F36H5.17	0.783382025352562	6.57380529064268e-05	0.00118569795624181
fipr-9	-0.930313143106455	6.61193353886091e-05	0.001191393098811
fbxa-95	0.338065089069205	6.70501988934182e-05	0.00120696996641707
far-7	0.761147206533958	6.814309088706e-05	0.00122542980753475
acaa-2	-0.2576280867975	6.92305134908955e-05	0.00124375490689523
F47B8.3	0.633363779052315	6.96070037018654e-05	0.00124928423919409
F23C8.5	-0.273067111128458	6.98553839928882e-05	0.00125250565717426
F42A10.7	-0.744788154829582	7.02608778495645e-05	0.00125802695284161
asg-2	-0.3750744743718	7.03017097017255e-05	0.00125802695284161
lpd-5	-0.189115291858369	7.04007567420159e-05	0.00125856062765643
unk-1	0.532867546434334	7.20751044653504e-05	0.00128722738141899
Y106G6E.4	0.29023509271942	7.25972807016842e-05	0.00129475559036965
meg-1	-0.210094849039927	7.26390573773193e-05	0.00129475559036965
ttc-36	0.546747253489389	7.33440300117037e-05	0.0013060409496991
gadr-5	0.526689668504796	7.36574181054169e-05	0.00131033808079705
T08B1.1	-0.334695993269621	7.40174167228338e-05	0.00131505525966199
F40G9.15	0.872967441257621	7.40914013464434e-05	0.00131505525966199
F53A9.1	0.815439116482297	7.41395765443895e-05	0.00131505525966199
lbp-6	-0.476445477921193	7.45949410138728e-05	0.00132184271205967
fbxb-103	0.61135978199437	7.54561897869879e-05	0.00133580232377529
F46F11.7	0.441883107400408	7.67381393015622e-05	0.00135717520490438
cpr-8	-0.383249838702746	7.8642329900389e-05	0.00138950068019336
R11.4	0.593355382705264	7.88832170940743e-05	0.00139010336967405
C27D9.2	5.37033946740226	7.88857533561373e-05	0.00139010336967405
nhx-3	-0.533481398039902	7.89058180245102e-05	0.00139010336967405
Y62E10A.13	0.3818521561806	7.93941197308124e-05	0.00139735187882469
F39F10.4	0.659051451162074	7.95784165546723e-05	0.00139916878507601
C27C12.3	-0.253031723218457	7.96512673974849e-05	0.00139916878507601
C36A4.12	0.677970479385162	8.02429421968746e-05	0.0014080226954062
fbxb-51	0.691430615669004	8.03101883909702e-05	0.0014080226954062
nhr-117	-0.839011477374281	8.07209254253227e-05	0.00141386044812889
fbxb-37	0.640464913574323	8.08853490077261e-05	0.0014153768337916
lips-17	-0.797722111136149	8.17673876516922e-05	0.00142943545663021
C23H3.2	-0.496646452960618	8.18484909664095e-05	0.00142947878411171
fbxb-115	0.922317397596102	8.25795462596311e-05	0.0014408625053228
fbxc-29	0.667726027884412	8.30752582591581e-05	0.00144812202340341
Y56A3A.7	0.221739266914736	8.32656435597552e-05	0.00145005044593861
suca-1	-0.267045666677969	8.39004416555671e-05	0.00145970710979891
rpl-6	-0.314719907426955	8.43922317344945e-05	0.00146685962252853
fbxc-43	0.536492855003416	8.6799793447095e-05	0.00150697281363021
R10E4.1	0.254721344479528	8.68658219396326e-05	0.00150697281363021
Y57G11C.30	1.62373822181906	8.72362877483355e-05	0.00151195705200428
daf-12	-0.386980731119515	8.77581110574603e-05	0.00151955258774827
arf-5	-0.186444654898253	8.83369153357383e-05	0.00152811936985638
F56D5.3	0.95446046007858	8.87247756189264e-05	0.00153336991019743
C15F1.1	-0.675622102907699	8.8936778219619e-05	0.00153557413562288
slcr-46.2	-0.70875137659884	8.93758919688648e-05	0.00154169173803219
oig-2	-0.390643078505786	9.06189791190112e-05	0.0015616527576898
nifk-1	-0.285571690389647	9.07493433625822e-05	0.00156241838226809
dsl-1	0.645693195380195	9.16666962958849e-05	0.00157588894403408
fib-1	-0.45796271424082	9.17051043830403e-05	0.00157588894403408
B0304.4	0.309751967256775	9.23830870716565e-05	0.00158604051562775
fbxa-175	0.747939250287783	9.2589070803638e-05	0.0015880772606424
WBGene00015674	-0.808244268719928	9.3165701975145e-05	0.00159646147748361
F14F9.8	1.31124464286931	9.37303253975006e-05	0.00160462433714874
agl-1	-0.229289966527401	9.48425466272466e-05	0.00162213766719659
E03H4.8	1.15359310965179	9.52973975404109e-05	0.00162838532394945
F49C12.12	-0.189187917954314	9.61644976184823e-05	0.00164014946329975
Y39H10A.6	0.538796026959221	9.61662905163375e-05	0.00164014946329975
Y105E8A.14	-0.243730666743734	9.79129422290933e-05	0.00166837413558308
fbxb-105	0.583331851387071	9.82687852421528e-05	0.00167286964839661
sor-1	-0.27179469628771	9.93760544967708e-05	0.00169013662002413
F18E3.12	-0.67738700180472	0.00010009723146171	0.00170081099551902
spcs-3	-0.194977357709471	0.00010077264337738	0.00171068854271161
slc-25A18.1	-0.298131840215723	0.000100886139915979	0.00171101763975038
T25C12.3	-0.48222936236306	0.000101642922055094	0.00172224600734731
T21D12.12	-0.574165725722438	0.000103346274573855	0.00174947729797696
R31.2	-0.144340471235915	0.000103536298998799	0.00175106367636945
cyn-3	-0.17790848828247	0.000104159610102312	0.00175996828184956
sysm-1	0.793015403936065	0.000104437460659647	0.00176145518662017
plpp-1.2	0.468889438790066	0.000104441377876714	0.00176145518662017
gale-1	-0.22525386045119	0.000106531887428849	0.00179504749336784
eef-1B.2	-0.282851932402377	0.000108394291293607	0.00182473760186025
nekl-3	-0.514941752423228	0.000108544320446656	0.00182557288625408
nep-17	-0.449984528783473	0.000109040442778294	0.00183127029096572
math-41	0.581389518667819	0.000109139686157371	0.00183127029096572
R04A9.7	0.542691012937511	0.00010918524808354	0.00183127029096572
W02B3.4	-0.724871702089553	0.000109576277862287	0.00183613484591173
C06E1.1	0.433549493099998	0.000110728841904882	0.00185373947944076
eif-1.A	-0.239818183976135	0.000111006233547513	0.0018566737186084
clec-54	0.501831092460202	0.000111118207441574	0.0018568383543155
dlhd-1	1.16804185258768	0.00011304349766315	0.00188727624519167
skr-14	0.425486599591551	0.000113291877036043	0.00188968772146082
F09F9.3	1.86965429572511	0.000113655914752888	0.00189402216876468
atln-1	-0.155589294272361	0.000114034077999825	0.00189708693375817
atg-2	0.467426451734084	0.000114048513205967	0.00189708693375817
syx-2	0.535277088278414	0.000115170238679177	0.00191399461556318
K08H2.3	-0.332145459475942	0.000116221350518946	0.00192882735100752
ets-4	0.484392542021794	0.000116274945091262	0.00192882735100752
rps-26	-0.365534186612842	0.00011715817270429	0.00194170714488304
bath-19	0.294502448550254	0.000117883717188634	0.00195195251567081
snf-1	-0.206231203270097	0.000118217204154039	0.00195569334733811
ZK1290.13	0.432204030408643	0.000118762655794381	0.00196293076817967
K01G5.10	0.33777488686357	0.000119652527132151	0.00197584250298786
sptf-2	1.21713768107727	0.00012050101934412	0.00198804812404305
BE10.3	0.521078622946795	0.00012103450266786	0.00199503925023061
Y48G8AL.13	0.303333000483186	0.000121689902777466	0.00200402547318579
col-140	-0.589930652064624	0.000123273558628905	0.00202826838862635
osm-7	0.516662802851107	0.000124070701557558	0.00203953835896742
C35E7.3	0.570706400930812	0.000124377246578713	0.00204252590880743
C01B10.11	0.448906713521369	0.000124477130353591	0.00204252590880743
C54D10.13	0.7104219561144	0.000128002616228626	0.0020984811232215
K09A9.8	-0.864825161148821	0.000128912359482478	0.00211149153851435
H25K10.4	-1.64034219900376	0.000129567971184276	0.00212031978766996
F48E3.6	0.735969443475773	0.000129767009431546	0.00212166726481559
C16B8.3	0.365326759466326	0.000130422040113252	0.00213046101644118
K02B12.2	0.515759378803639	0.000131228463671182	0.00214170978276999
tpra-1	0.627265731070457	0.00013217766746658	0.00215526652216134
T05E12.6	0.382566838541036	0.000133690906508277	0.00217798778783781
fbxa-21	1.1336035142985	0.000134116429623174	0.00218137714898089
F26D11.1	0.309906120833265	0.000134138917142106	0.00218137714898089
C39D10.11	0.471412624781979	0.000134957685538244	0.00219104736467178
oma-2	-0.23454832964954	0.0001349745915204	0.00219104736467178
snr-2	-0.247578354810266	0.000135324907881782	0.00219377753048834
T02G5.11	-0.515300650823933	0.000135384103691102	0.00219377753048834
sqst-2	0.724520449029235	0.000136017238997065	0.00220207428513413
nhr-74	-0.700496886858507	0.000136766528673122	0.00221223510480963
gst-36	-0.432882536084071	0.00013719259306818	0.0022171542529534
Y47G6A.5	0.47677302892801	0.000137667503848779	0.00222141431292546
C10C5.4	-0.477038252127119	0.000137700562712007	0.00222141431292546
fbxb-31	0.693907376108156	0.000137860347495899	0.00222202037041041
rps-7	-0.340332923867344	0.000138147762468543	0.00222468066380919
clec-246	-1.23611719927211	0.000139086004566957	0.00223780765401048
fbxb-106	0.707719685090184	0.000139598874493958	0.00224407350766989
acr-25	-1.27876204478693	0.00014064270135561	0.00225885596585366
gst-42	-0.378862310976681	0.000140929292496238	0.00226130313613559
acs-22	0.321199478567021	0.000141043823572838	0.00226130313613559
F52D1.2	0.95662889806118	0.000141746517443894	0.00227056690189201
pkg-2	-0.314547265882974	0.000142594957766035	0.00228214694290869
amt-4	0.578174720832587	0.000143101138488652	0.00228823377208636
T01G1.2	0.526665445558767	0.000143579901170774	0.00229214801544307
C08F11.13	1.36503255482239	0.000143598074340776	0.00229214801544307
sdz-4	0.707801635774288	0.000144660540484642	0.00230708183030814
21ur-6354	1.38148241325979	0.000145407552886357	0.00231696294393239
W04B5.2	0.531558182736682	0.000145982339250802	0.00232408485982385
fbxc-22	0.714583120019464	0.000146729297509892	0.0023339329466556
C02D5.4	0.2621825073202	0.000147558075563996	0.00234506413621416
F42G10.1	-0.56702669274267	0.000147772560809686	0.00234528449831359
Y18D10A.3	0.322381735015488	0.000147829934275748	0.00234528449831359
clp-1	-0.188817007568156	0.00014870840902731	0.00235716441545382
K08C9.8	0.492950329741427	0.000149503374915001	0.00236770109697704
Y54G11A.4	0.750126948825625	0.000151681332880513	0.0023981641427217
F39G3.4	3.08044575191084	0.000151750638701755	0.0023981641427217
fbxa-3	0.839796306035083	0.000151822613072586	0.0023981641427217
F40G9.20	1.02254324676735	0.000153183669225977	0.00241615714535298
nep-12	-0.554334063652302	0.000153227500610086	0.00241615714535298
gbh-1	-0.273240339600852	0.000154053744459339	0.00242708070018651
decr-1.1	-1.55351523293218	0.000154630084932045	0.00243262717830367
cpt-2	-0.182658648966743	0.000154673396299381	0.00243262717830367
Y75B8A.19	0.308224086411672	0.000154970590835116	0.0024351947380927
B0554.5	0.846024973061164	0.000156307964922019	0.00245368006544561
Y66H1A.4	-0.462198715051119	0.000156416874531184	0.00245368006544561
tlp-1	0.407614405453314	0.000157322732212213	0.00246576258133642
Y54G2A.36	0.920476448123476	0.000157776199149435	0.00247012709013828
T07G12.5	1.25320825201886	0.000157935858804989	0.00247012709013828
gpd-2	-0.401665768487284	0.000158008789716233	0.00247012709013828
cdc-48.1	-0.305850409170995	0.000159353667455	0.00248901119243931
slcr-46.1	-0.357671872213747	0.000159607517790838	0.00249083629266543
H25K10.1	0.794265841392317	0.000161787866944175	0.00252068123371046
Y13C8A.4	-0.495997259569986	0.00016179720585997	0.00252068123371046
clec-172	-1.2410099429103	0.000162688295922298	0.00253239375698912
F49D11.3	-2.28545593030429	0.000163615199077178	0.00254464322876148
Y43F8C.3	0.63967912505312	0.000163846228707759	0.0025459494215115
sec-61.B	-0.338282788792534	0.000163979251558768	0.0025459494215115
fbxa-188	0.868003268972982	0.000164161553019501	0.00254660511556958
Y25C1A.6	0.545487074987295	0.000165003445291419	0.0025574830680676
F48G7.13	1.24842475717249	0.000165315428575403	0.00256013612174566
vha-1	-0.204318327757461	0.000166472360299792	0.0025758587086047
fbxb-50	0.798141571752048	0.000166618355151321	0.00257592543793041
R02D3.8	0.305100420435231	0.00016945727580832	0.00261758940651747
fum-1	-0.251972904577509	0.000171584123661584	0.00264819265899089
ced-11	0.568411153557297	0.000173204336444199	0.00267093133239354
Y54F10AR.2	0.201826456482343	0.000173396017654779	0.00267162118388267
Y57G11C.41	-1.37781228573631	0.000174288998260215	0.00268310607736576
F54C9.3	0.52587731543038	0.000176710497798057	0.00271808253846571
nhr-114	-0.5550752032464	0.000178584312014198	0.00274458273603561
lys-6	0.584448239924433	0.000179818128052769	0.00276121063017516
W01D2.1	-0.337609254908394	0.000180458341295704	0.0027672651352514
C31H5.4	0.44534259925379	0.00018051682802971	0.0027672651352514
hnd-1	0.632771518575419	0.000181092284070153	0.00277132100267232
F57B9.1	-0.19447107980808	0.000181125678491584	0.00277132100267232
K08F9.1	0.741673019142487	0.000181238692710928	0.00277132100267232
C50F7.5	1.6142319111205	0.000181728973627229	0.00277648274749298
rpl-20	-0.399104284227898	0.000183397637531141	0.00279962422162357
F18G5.6	0.441757789050368	0.000183808553131771	0.00280354304067847
C23F12.4	0.33579567505991	0.000186137590056276	0.00283668694452066
erfa-1	-0.286383003028732	0.00018641603277836	0.00283855099827752
fbxb-90	0.633188473501911	0.000187522831821654	0.00285301473251003
hsp-43	-0.415809367288311	0.000188203108062886	0.00286083699384554
bicd-1	0.452226404579662	0.000188442300381709	0.00286083699384554
Y38C1AA.1	0.175204611121364	0.000188509032430942	0.00286083699384554
fkb-5	-0.515993605542079	0.000188995611467818	0.00286582920108124
Y48G1A.2	0.239944861853595	0.00018936186626478	0.00286899007546664
gcy-8	1.14702650269868	0.000189584173861929	0.00286996658200144
Y17D7B.3	2.11871607648816	0.000191859550009017	0.00290199540658397
nspe-7	1.5476415023722	0.000192453446273385	0.00290855869218322
chch-3	-0.25482011903349	0.000192948122212077	0.00291327090988991
fbxb-57	0.835972875352319	0.000193085718410283	0.00291327090988991
klf-3	0.679605830538297	0.000193344252604178	0.00291475278324756
ric-19	0.387872485519015	0.000194542140440398	0.00292753265092903
fkb-3	-0.452560950253486	0.000194576539910395	0.00292753265092903
F23H11.5	-0.250902356707069	0.000194675044000506	0.00292753265092903
nyn-2	0.193940531587012	0.000195566407660832	0.00293850649395172
R05A10.1	2.04522159650515	0.000196405212207474	0.00294867313224119
cil-1	0.241049002463019	0.000197004616235856	0.00295523178860074
spl-1	-0.222925724288786	0.000197860906428274	0.00296562995859229
C40A11.6	1.03298296831941	0.00019815175554634	0.00296754288928172
oac-7	0.74723243587405	0.000199810733429579	0.00298992505718779
cyp-14A2	-0.625833826491578	0.000201395823248608	0.00301116567638399
test-1	-0.486089737910241	0.000201726775563667	0.00301363558465327
vha-17	-0.157842902465998	0.000208241971319925	0.00310841320243642
C04E12.5	-1.16494542002948	0.000208651163219737	0.00311196620057264
Y102A11A.2	0.852261841313909	0.000209996558991551	0.00312946511395523
F15B10.3	0.550398054286059	0.000212789568719521	0.0031684907034313
gss-1	-0.158128000014829	0.000213513228118597	0.00317666448479886
C28C12.4	1.20518277309382	0.0002153911493148	0.00320198404390218
cdd-2	-0.302977575416462	0.000217222992470396	0.00322637967081947
F07G6.10	-0.637536647014336	0.000217387112741535	0.00322637967081947
gtl-1	0.64706197408399	0.000219573973864028	0.00325617815564592
T22F3.11	1.03222398211762	0.000220604038753555	0.00326878730935483
Y47D7A.6	-2.12507826644856	0.000220933390300328	0.00327100160346113
T19B10.2	0.663002964207121	0.000221619655685691	0.00327835147138065
F44E2.9	0.351931852872173	0.000221790457609493	0.00327835147138065
anmt-3	0.699289769705652	0.000223082898082297	0.0032947767425136
T03E6.9	1.96200243343123	0.000224677720579947	0.00331563769307143
clec-36	0.711528539226793	0.000226555863729652	0.00334064246428937
fbxa-162	1.15971293617419	0.000227526206851257	0.00335223173967804
21ur-13377	2.9159307506285	0.000228439567322969	0.00336190843628009
grk-2	-0.243675571039534	0.000228552820375238	0.00336190843628009
deb-1	-0.423745192559129	0.000230580533588543	0.00338758100457258
T24B8.4	0.420046866791716	0.000230670770786032	0.00338758100457258
F54E4.3	-0.449411978917128	0.000232690787446456	0.00341448846373206
F21C10.9	-0.804314637705383	0.000233440195974253	0.0034227227443612
acs-7	0.396647444469775	0.000234698293238078	0.00343839618804311
R08F11.4	1.01642037537541	0.000235637850786597	0.0034493814534228
idhb-1	-0.248844463201441	0.000236092139903535	0.00345325116298164
daf-36	0.509231762533955	0.000238312247115754	0.00348027262209818
gpd-3	-0.372258148226233	0.000238368705058275	0.00348027262209818
fbxa-31	0.594425816051277	0.000238513815914105	0.00348027262209818
PDB1.1	0.424874063168805	0.000239806424666211	0.00349632767189766
C53C11.5	0.543819020205149	0.00024159207313427	0.00351953964876135
K11D2.1	0.391145316911551	0.000242567481601282	0.0035309202425884
T10C6.15	1.16182797484905	0.000244477733799927	0.00355587974257317
icl-1	0.706122387141441	0.000244733144420883	0.00355668195486308
pigk-1	0.172010753896327	0.000244924140998217	0.00355668195486308
ddx-17	-0.245287165017851	0.000245713860237382	0.003565302229031
F35E12.13	3.44707977731854	0.000245976107091489	0.00356626124643569
Y67D2.5	0.236657746058292	0.000249604982676899	0.00361599058968023
pas-2	-0.284000370343922	0.000250236180049053	0.00362224839926101
pas-7	-0.252288667493352	0.000250645977867136	0.00362529397263516
dmd-7	-0.397769443966191	0.000250985450406575	0.00362541715012494
F41C3.7	0.888434686427903	0.00025105330795926	0.00362541715012494
Y94H6A.7	0.290278399680151	0.000251490113320182	0.0036288426589478
fbxa-72	-0.580415780800045	0.000251921814594846	0.00363218914444798
clec-25	1.39294115899829	0.000256573816128518	0.00369633007213359
21ur-9213	1.8498984961207	0.000259303022807081	0.00373269062363858
T11B7.2	-0.511936235493685	0.000259890610495718	0.00373818923213818
T24D5.2	-0.280682309918183	0.000260172916860544	0.00373929154264154
gdi-1	-0.151374666714744	0.000261556218592117	0.00375620348358868
ZC190.4	0.671868428257499	0.000263809722520141	0.00378557582094607
Y116A8C.25	0.579347632023904	0.000266111346255209	0.0038127860081701
elt-7	0.418561912415474	0.000266163525388242	0.0038127860081701
ztf-22	0.458729090575037	0.00026633508774963	0.0038127860081701
C05C8.8	-1.46432783222205	0.000267577888602007	0.00382756380226049
F14F9.3	1.83249504653261	0.000267881103222808	0.00382888863026247
T16G12.4	0.331575172847469	0.000271022035217583	0.0038707396875812
B0280.2	-0.647006134845144	0.000272122905036928	0.00388341172407879
ZK185.5	-0.424979574605337	0.00027239721226116	0.00388427742440796
R160.10	1.21448245065879	0.00027341827643325	0.0038957818838816
nlt-1	0.27904856194579	0.00027536364728144	0.00392042793361305
M03F4.12	2.78624170423361	0.000276947721629982	0.00393782113436812
oac-31	1.10230106846217	0.000277018493529334	0.00393782113436812
metl-9	-0.229380675716214	0.000277760500686348	0.00394528411170195
unc-108	0.177807550045985	0.000281424296456581	0.00399420385158244
clec-139	-0.957263233077836	0.000284092824472258	0.00402893263785501
ctsa-3.1	-0.414821647510068	0.000284385900206821	0.00402994548063929
srw-67	4.51927988548183	0.000285674440391057	0.00404505218126932
sir-2.3	0.497702298203149	0.000286520409934002	0.00405387359767322
F14D2.11	0.355139050451898	0.000287189460103656	0.00405716334975502
jmjd-4	-0.389155119854875	0.000287199231677835	0.00405716334975502
F19G12.10	0.460626269274005	0.000292287506615592	0.00412583785541776
cyp-13A2	-0.688163473926399	0.000292635949720138	0.00412755174698358
F55C10.5	-0.452123593877126	0.000294031924609962	0.00414402668320443
fbxa-44	1.33304988361952	0.000294547816111738	0.00414808198662085
K10D11.6	0.621801648632516	0.000298631119608682	0.00420233156780607
Y48A6B.8	0.909925346655045	0.000302034238865575	0.00424693309885152
acs-3	0.462203929505521	0.000302627045308642	0.00425198014741609
T24B8.3	0.52809638575335	0.000303838828440342	0.00426373511105282
ZC443.3	0.703937614683082	0.000303932715688051	0.00426373511105282
T27E4.7	0.461175497673341	0.000306885908234305	0.004301844793838
cyp-33C8	0.708572162045797	0.000310227286608887	0.00434533304918041
gsto-3	0.379467121570255	0.000312445454055103	0.00437303371838016
lido-2	0.483518109213887	0.00031408389518726	0.00439258407569198
ZC412.3	-0.359110556708662	0.000318529452426499	0.00445133280135756
bec-1	0.209955670153129	0.000318852799552606	0.0044524291464408
lag-2	0.654904985340406	0.000324265929849652	0.00452366302756395
T05A1.5	-0.665118790954979	0.000324451712663956	0.00452366302756395
srd-64	-1.05058375635594	0.000324990128557466	0.00452523471909768
siah-1	0.748521203128136	0.000325062237673482	0.00452523471909768
ctg-2	-0.433094204060674	0.000327970257371751	0.00456106312391218
lias-1	0.185967762103961	0.000328137647328372	0.00456106312391218
best-1	0.606025842777899	0.000331021943981228	0.00459404626877208
gtf-2A2	0.316956453035787	0.000331164704662721	0.00459404626877208
R160.3	-0.623623379565715	0.000331268613297409	0.00459404626877208
W03F11.5	0.699348800178198	0.000331673808137336	0.00459615968425679
mnp-1	0.591039996534872	0.000331942297924511	0.00459637693721671
lact-2	0.385038121728331	0.000332472869455361	0.00460022012143678
T23F2.5	-0.243936539141204	0.000334915937478836	0.00463049936068648
ptr-22	1.50026919696191	0.000336759731097622	0.00465245339748166
F17C8.3	0.546215343935052	0.000337166383487161	0.00465453456201979
pyp-1	0.261235511638469	0.000339572468188372	0.0046825787106128
F46C3.6	0.543511822145566	0.000339770645754701	0.0046825787106128
crn-2	0.281566004920202	0.000339970513063577	0.0046825787106128
btb-6	0.342744029468047	0.000343568328233426	0.004728550927791
W02A2.9	1.09662016896521	0.000344673648888548	0.00474017519700657
bam-2	0.429286785086681	0.00034550415253974	0.00474800528898337
F40A3.2	-0.433980559673573	0.00034618221481474	0.00475373024739183
F18E3.13	-0.633346307282605	0.000347479130952618	0.00476793817347136
Y32F6B.1	0.609330219807117	0.000348267353989492	0.00477514989659347
T16G12.3	-0.435004065336193	0.000350235709705795	0.00479851954646651
nduf-7	-0.155153328022418	0.00035251940723654	0.00482266393415547
ZK1025.1	-1.41923775490689	0.000352528484048877	0.00482266393415547
Y32B12C.3	-1.11940207104953	0.000356445282110528	0.00487225984639965
ctsa-4.1	-0.490970557338218	0.000356689833098176	0.00487225984639965
B0281.3	0.49498449644441	0.000357385496590789	0.00487512789640786
hrde-1	-0.326883585574892	0.000357436086349028	0.00487512789640786
slc-17.9	1.05248210249365	0.000359149953982555	0.004894831569233
glna-1	-0.443713268757545	0.000359906609509692	0.00490146971347993
spp-5	-0.359605453859292	0.00036181477839851	0.0049237683278917
acdh-12	-0.208590344066555	0.00036393639617443	0.00494790458300117
ttr-2	-0.270435419071032	0.000364132684233846	0.00494790458300117
ZK287.9	0.445257974034297	0.000364472738537025	0.00494882663132312
aat-6	-0.547669384631623	0.000372322496483273	0.00505163828997193
C04B4.2	-0.197157730894316	0.000374818733065135	0.00508171467998301
sms-1	-0.170954532407669	0.000377527634928637	0.00511462737007269
pmp-4	-0.343198874237293	0.000379348304744346	0.00513546651418984
C10G8.4	-0.579242292953742	0.00038053261596817	0.0051476662878849
efhd-1	0.431258585017981	0.000384225562304791	0.0051937583258464
K12H4.3	-0.317588782243795	0.000386441553228161	0.00521983200537978
col-78	2.6799348013008	0.000387923351422047	0.00523595727706328
snpc-1.3	0.536623500685695	0.000390249937176048	0.00526345260222383
icd-1	-0.24481866456086	0.000394006837565166	0.00530933916143716
irg-6	2.45164206448682	0.000394236173364511	0.00530933916143716
fbxb-95	0.641967063737742	0.000394808515943597	0.00531112282365377
ugt-5	-0.362416602517975	0.000394952866045867	0.00531112282365377
lron-8	-0.424106384662296	0.000396204387050096	0.00532401475310997
atad-3	-0.382205201229639	0.000397721840855351	0.00534045848492698
F23A7.1	0.813462243465353	0.000398873717007025	0.00535197272981899
R07E3.1	0.412637475395605	0.000400525964883757	0.00537017888462507
pqn-83	-0.16593674185753	0.000401101562967746	0.00537027758716041
mop-25.1	0.195636048487074	0.000401124083568772	0.00537027758716041
F22B8.4	-1.59104429550405	0.000402953844908459	0.00539080489645378
srbc-20	3.42197667370802	0.000404583139765108	0.0054086221059334
F41G3.18	0.742224487239634	0.000405518041905437	0.0054114683206415
C38D9.8	0.684521234407855	0.000405561133874589	0.0054114683206415
acsd-1	-0.495639841393234	0.000405688978660929	0.0054114683206415
C25F9.12	2.95934963997386	0.000407544097474594	0.00542972237233296
ddo-1	0.294755065579712	0.000407654751566718	0.00542972237233296
gta-1	-0.259178116106748	0.000411308346862307	0.00547437558880205
acp-1	-0.499480587618517	0.000412643428244764	0.00548493737637843
K05F1.6	-0.386079719615782	0.00041270525993541	0.00548493737637843
Y53F4B.38	-0.585920927652458	0.000414910317283679	0.00550706728601032
eol-1	1.81876123821852	0.000414976193929605	0.00550706728601032
Y63D3A.7	-0.234307363045952	0.000415566263088138	0.00551087544070418
T08B2.15	-1.11230505262573	0.000416545754171546	0.00551983845232718
C27F2.7	0.259729825597608	0.000418428438491564	0.00554074831770948
pam-1	-0.235053676698105	0.000418737505821449	0.00554080538088774
grd-10	-1.23468097261663	0.000419251387286604	0.00554357052527836
F09F7.5	0.454480080919983	0.00041984973136037	0.00554744764960966
lact-9	0.177998145767323	0.000422891156381656	0.00558357597253078
drr-1	0.361345281796304	0.000426421771898539	0.00562610612110837
rpb-9	-0.207325904951576	0.000427535514780948	0.0056367100755855
calu-1	-0.386870376616165	0.000430470865149065	0.00567129768063416
T22B7.8	0.71154771417891	0.000431282587775228	0.00567787742819799
asg-1	-0.221956722145457	0.000436763237283649	0.00574587005575545
T26A8.4	-0.241558627672895	0.000441180196172102	0.00579978101706796
skr-7	0.436901898240324	0.000443724840162508	0.00582901829407121
C02F5.13	0.227535810375356	0.000444569708924797	0.00583590027289656
prg-2	-0.402694920718825	0.00044637738858296	0.00585540209367013
dmsr-16	-1.17282980845738	0.000446953305931204	0.00585872967205135
skpo-1	-0.210852751528216	0.000447782459746167	0.00586536952496041
phb-2	-0.224253842686229	0.000449909418755749	0.00588552497348267
R01E6.7	0.93106445812047	0.000450063923707713	0.00588552497348267
C15A11.7	0.514602901276292	0.000450292351252098	0.00588552497348267
ref-1	0.320878123525945	0.000455429184823111	0.00594838937447484
M01H9.7	-2.67905443331116	0.000458264559531214	0.00598112559715507
grsp-2	-0.580916218370495	0.000459947791064064	0.005998788227644
fbxb-20	0.545726995208138	0.00046139750544752	0.00601338211221604
C10A4.13	0.634573038791927	0.0004637112745422	0.00603920822525196
C01B10.7	-2.22547670963849	0.000464280033765501	0.00604228725403764
cbp-2	0.464559046331343	0.000466047007098308	0.00606094466098307
F28H1.1	0.379487438943236	0.000472451117957476	0.00613983829562893
oaz-1	0.200723838009087	0.000473280094661382	0.006146218143599
F27D4.3	-0.277240245356823	0.000474780637499726	0.00616130390462706
B0281.5	0.463955714800072	0.000475845655095117	0.0061707202962085
hrpa-2	0.21323061663756	0.000476572874723322	0.00617574585555575
C43D7.10	0.830517142045175	0.000478273530318387	0.00619336969709302
zmp-1	1.09393063551615	0.00048111656619259	0.00622491553017574
fbxb-30	0.80020573744199	0.000481394380695621	0.00622491553017574
ech-3	0.284920990441301	0.000482960287148126	0.00624072564366744
fipr-13	-0.619305615169252	0.000485554705428017	0.00626979410467811
W04A8.5	0.458864039743975	0.000486600181814536	0.00627457534342701
gst-4	0.607978570273089	0.000486615215567465	0.00627457534342701
ttr-37	0.700605619053421	0.000487286763305974	0.00627878146255557
R11E3.19	1.57179236908719	0.00049213532775169	0.00633607128215389
rps-23	-0.305436732469166	0.000492429939039846	0.00633607128215389
chst-1	0.578544667825086	0.000493758810423043	0.00634867675551722
C51E3.6	-0.459603346757183	0.000496107429713713	0.00637009435069831
pqn-92	0.509474456834235	0.000496261913550315	0.00637009435069831
Y116F11B.10	0.579437872157862	0.000496626394304011	0.00637009435069831
pfk-1.1	-0.257492677092599	0.000496826015581663	0.00637009435069831
Y26E6A.3	-0.483882491678222	0.000498030570344648	0.00638103861834817
F42C5.4	0.614681774268807	0.000499791224032301	0.00639908749586709
eri-5	0.292870322466886	0.00050263364781794	0.0064290529626073
did-2	0.161518451748073	0.000502838859954215	0.0064290529626073
crm-1	0.366425999434666	0.000505414511680006	0.00645638553696674
ain-2	-0.198922213900916	0.000505686871164438	0.00645638553696674
glb-13	0.481309344264015	0.00051044445961582	0.00651255489142121
twk-22	-0.465151151786775	0.000512641708780488	0.00653600203880649
alr-1	0.503424371633592	0.000514358167242815	0.00655329070682665
sgn-1	-0.422259844011092	0.000515824747626193	0.00656737376512032
ZK1321.4	-0.545561150610259	0.000519159901906232	0.00660521076036193
sid-2	0.262245405294927	0.000520198180429775	0.00661114918316735
rpl-12	-0.291465362007938	0.000520354585883836	0.00661114918316735
Y53F4B.8	0.951410594553191	0.000521212939078259	0.00661114918316735
F29G9.1	0.562193602724131	0.000521335276641646	0.00661114918316735
tpk-1	0.306749977219348	0.000521444801092458	0.00661114918316735
nhr-142	-0.40234440183456	0.000527406258357703	0.00668207190466996
Y41D4B.14	0.479153090373778	0.000530435124050601	0.00671576670638159
C35D6.5	-1.83274988771172	0.000534328633944266	0.00676035413621482
ZK1236.8	-0.668868120723151	0.000535754978607443	0.00677368655498047
F38B6.4	-0.455152727819859	0.00053818754381839	0.00679928626879367
C55A6.12	-0.389188032559662	0.000538527706235239	0.00679928626879367
F59B1.10	-0.560175808464331	0.000543398593927712	0.00685602348105464
T26C12.1	0.210847756365254	0.00054483997901028	0.00686679875512449
aakg-2	-0.147828940160751	0.00054500800856084	0.00686679875512449
sdz-7	0.656904494978423	0.00054683622271093	0.0068850618871935
R11E3.2	-0.537595186801773	0.000547768046909071	0.00689202135699227
sec-22	-0.213079672688481	0.000548764550109361	0.00689978442983285
cpt-4	-0.734832746945228	0.000549871665736579	0.00690892657550569
skr-15	0.401272055269787	0.000550607806302751	0.00691339815358447
scpl-3	-0.185579518099362	0.00055142014519751	0.00691881964101859
pud-4	-1.64143484492981	0.000553191033564633	0.00693373274535832
C45G7.4	0.551721984734303	0.000553371443458276	0.00693373274535832
T16H12.9	0.790556208706383	0.000553950671148854	0.00693621015988796
lotr-1	-0.348341862707425	0.000555114990111062	0.0069449474989958
C26C6.9	-0.287179019390335	0.000555412445054722	0.0069449474989958
drd-10	-0.884423887525096	0.000556248907033505	0.00694679390483405
Y105C5A.25	-0.585702913567146	0.000556324290492182	0.00694679390483405
gba-2	-0.598515553136516	0.000557548465911233	0.00695730175616481
F37C12.10	0.501003793926969	0.000559695011482408	0.00697929698474736
C44H9.6	0.513032626261267	0.000562142537508321	0.00700174500606701
spin-3	-0.756845945795213	0.000562265425931348	0.00700174500606701
algn-14	0.237785434652459	0.000563484939492515	0.00701212846332198
B0019.2	0.243138036928947	0.000573278492859972	0.00712763050429728
swt-3	-0.697262496114886	0.000573550598305205	0.00712763050429728
hmg-11	0.540538966144309	0.000579667556952886	0.00719635927232502
F02E8.4	-0.275415811550812	0.000579872742641008	0.00719635927232502
fbxb-5	0.939571207780129	0.000581910052208948	0.00721539954195878
sem-2	-0.287907042125217	0.000582200711074942	0.00721539954195878
asp-6	0.373141296229243	0.000583751480142321	0.00722969050440568
tag-229	0.184417837891502	0.000592292044127406	0.00732707803646684
gst-23	1.3593311358227	0.000592420918189662	0.00732707803646684
ins-22	-0.995798738730293	0.000595831763968184	0.00736425377342322
M03E7.1	-0.761394940910214	0.000601214658633112	0.00742573621508737
kgb-2	0.908967599972267	0.000603838148949365	0.0074530762973852
gstk-1	0.344158830575391	0.000605519529644845	0.00746875886599249
gpa-17	0.484604464175619	0.000609760878522151	0.0075159745982449
M04D5.3	0.471498904848815	0.000613704294625142	0.00755945649090765
sod-3	-0.809236733327122	0.000615338634377711	0.00757445613515313
C35A5.6	0.502089240953735	0.000618273204339242	0.00760542972130701
C35E7.5	0.501620267811427	0.000621279676290129	0.00763724529724871
C08F1.6	0.582257873614684	0.000623464527091306	0.00765892470746421
C31B8.7	0.63523931515376	0.000625127172914916	0.00767416416662126
cyp-37A1	0.349915187932954	0.000628188481023588	0.00770654168251677
K03A11.1	0.451434982920846	0.000629995504447438	0.00772349849383606
E02H4.4	1.37500177022287	0.000631829355512556	0.00774076112707128
zeel-1	0.578053173618866	0.000635377143744397	0.00777898441105513
rpl-36	-0.351358921844144	0.000636521155177357	0.0077877463810764
dhp-1	0.51842494105081	0.000639661904698445	0.00782090994574475
T14B4.3	-0.176630516914189	0.000643978297466945	0.00786839343161728
atg-7	0.191440833000946	0.000646033123737179	0.00788549749143541
ZK673.1	-0.448415081522973	0.000646245600475153	0.00788549749143541
phat-5	2.3832950404129	0.000647442738189288	0.00789250798648576
npr-13	-0.609063854247843	0.000647688351346832	0.00789250798648576
ZK418.6	0.542222318292689	0.000649621391145957	0.00791076122734404
ran-1	-0.260004825836218	0.000651984396404183	0.00793422243040458
acl-8	-0.190154800378187	0.000656279330119598	0.00798114682334743
hex-5	-0.47899579556205	0.000663749098743672	0.00806659248947774
zig-12	-0.468804816450836	0.000666071482120141	0.00808940922940968
dab-1	-0.174810022883255	0.000666660470714144	0.00809115755544315
F55C9.14	0.806527033226857	0.000669433050616583	0.00811938778736498
fbxb-33	0.581624632704406	0.000671709636411307	0.00814156859972932
fbxb-10	0.683511994588364	0.000672436830424551	0.00814495270749417
W07B8.4	1.31885804469821	0.000673717641553542	0.00815503358261315
end-1	0.68580624381956	0.000677319769518277	0.00819318079149154
Y54E10BL.3	0.893002570725122	0.000691251453978625	0.00835614540211794
fbxc-34	1.00102147559777	0.000695732442335818	0.00840083978023469
abhd-14	0.452476568158247	0.000695872873276137	0.00840083978023469
xbx-4	-0.814218646689884	0.000700953966930966	0.0084565654099349
ZK1010.8	0.659737717829048	0.000708242081811831	0.00853882578874065
B0546.4	0.299458205387976	0.000715769155907867	0.00861858538645658
rps-24	-0.30255655145133	0.000715805727602961	0.00861858538645658
zhit-3	-0.240758095890628	0.000717998273354062	0.00863926314219073
Y36E3A.2	0.986033161881571	0.000725662883841751	0.00872413220981684
acl-7	0.235623017585212	0.000726011332349864	0.00872413220981684
fbxb-78	0.815016981994189	0.000728031678504024	0.00874263140480955
memo-1	0.382406022758925	0.000729974599646639	0.00876017702717858
sbsp-1	-0.506740489347745	0.000732944571201613	0.0087900166550241
ZK550.2	0.455206731755748	0.000734747618932382	0.00880260501965656
fbxa-115	0.421677201780428	0.000734962566406615	0.00880260501965656
comt-5	-0.72412039641203	0.000735881363332788	0.00880780715388639
sago-2	0.467495326700908	0.000739028617758522	0.00883965743386032
C07A12.7	0.221658594878096	0.000739937387194746	0.00884470850531734
F40A3.6	-0.53699336167462	0.000742094537815934	0.0088646654349747
rbm-7	-0.155121689269481	0.00074397185625306	0.00888125562609119
magu-2	0.487418222782908	0.000744969212601767	0.00888732628235743
F42A9.18	0.979856457256268	0.000747751161301298	0.00891466482860256
ttr-23	0.980175182200453	0.000751223391898132	0.00895019166979026
zipt-2.2	-0.547246005609416	0.000752918985980946	0.00896451871913528
H23L24.4	-2.19550122956166	0.000755422927485643	0.00898844518626733
xrn-2	-0.272549179488465	0.000757264750158094	0.00900446724828274
dhs-16	-1.29979260183587	0.000762768351922243	0.00905952688470537
Y58A7A.4	1.77831330303292	0.000762891791457231	0.00905952688470537
R53.4	-0.199127258539953	0.000764195907170848	0.0090690899401261
ZK899.1	0.469536580381272	0.000767307245557093	0.0090961971934972
nucb-1	-0.325456442552209	0.000767480693846582	0.0090961971934972
Y37A1A.2	-0.630188728909527	0.00076827200210352	0.00909964382426326
cdf-1	-0.181997391491643	0.00076932419689918	0.00910617397384374
srh-221	-4.62430073054079	0.000777068638084867	NA
C32H11.4	0.910932880454019	0.0007820422153325	0.00925068934089797
Y45F10B.13	-0.52741140909858	0.000786054430504476	0.00929210377178276
Y56A3A.19	-0.201025838847673	0.000788594207832724	0.00931409616145243
Y48E1B.8	-0.900335060145272	0.000788939447150142	0.00931409616145243
F44G4.6	-0.718878044050945	0.000792305884802298	0.00934776981933198
Y57G7A.2	0.580431956693619	0.000793461722777521	0.00935533565617257
T24C2.3	1.75580219018334	0.000794921811957448	0.00936647664497626
dyc-1	-0.506888498084479	0.000797153042153515	0.0093866835876898
Y7A5A.6	0.624348204496447	0.000801020898515036	0.00942612359605299
cysl-1	0.312135974871999	0.00080213638954241	0.009433144694871
T28C6.10	0.878505349267935	0.000803283973923926	0.00944053389134512
enol-1	-0.227016378239006	0.000809140386277418	0.00950321793469622
rict-1	0.18141931638313	0.000809807451468458	0.00950491237904973
hrg-1	-0.517095026005261	0.00081423819971513	0.0095507514251747
pas-4	-0.25662124451181	0.00081571311764169	0.00956188278004099
Y111B2A.2	-0.316679173355624	0.000816960313506218	0.00957033212619623
rcan-1	0.374683414258561	0.000818966850029283	0.00958766020629903
rab-11.1	-0.156736326508588	0.000820066901188314	0.00959436057304037
EEED8.2	0.801893648688284	0.000822741682779874	0.0096194640094025
ifta-1	-0.390811626482423	0.000825759870149159	0.00964854768584952
F38A5.2	-0.161191074863957	0.000826872088459171	0.00965533811193075
rps-27	-0.33859362770351	0.000829171985185097	0.0096759793726895
atp-2	-0.248975778302037	0.000831163464835486	0.00969299740485822
lsm-8	-0.27661611674391	0.000834514568266556	0.00972583933695785
twk-5	-0.349484716682872	0.000835677216576685	0.00973315020793127
F49E12.10	0.766936417120903	0.000843654039100965	0.00981976573936917
mtd-1	-0.547150587326863	0.000848120305255713	0.00986543523343194
coa-7	-0.271374732269859	0.000848852500877491	0.00986763895041795
ifa-4	-0.408792522745619	0.000854109205963904	0.00992240221957172
cest-9.2	-0.410734292829809	0.000857728548670401	0.00995808604302462
C25D7.5	0.962332513044574	0.000858567331583294	0.00996146308584293
C18B2.5	-0.355581113397992	0.000859322209589388	0.00996386294167389
Y45G5AM.6	-0.454577588808762	0.000861965518444097	0.00998535063879573
C06E2.1	-0.618152042969443	0.000862273829982361	0.00998535063879573
sago-1	0.19549132264738	0.000865472754044609	0.0100160153668269
clec-67	0.558894860803031	0.000866958522159413	0.010026827539046
grd-17	5.14220250603437	0.000867511463169756	NA
C27D9.1	-0.260450153538369	0.00086774696301034	0.0100295661376294
rps-16	-0.333463827043799	0.000870682260294407	0.0100570992213549
ric-8	0.15720820175226	0.000874356907827551	0.0100931320261668
zip-8	0.658943389819106	0.000875804863276936	0.0101034316111916
cest-7	-0.656700279736861	0.0008815381168421	0.0101631227027941
snx-1	-0.216625978176568	0.000883256469421719	0.0101764802728494
T24C12.3	-0.285516835305167	0.000886967319492342	0.0102069948764698
R07C12.1	1.65786813449716	0.000887516152105145	0.0102069948764698
F27C8.2	0.833556646572404	0.000887589180996576	0.0102069948764698
ifd-1	-0.547581219358858	0.000891682875702089	0.0102475893572312
rpn-10	-0.192719136367503	0.000895124512170887	0.0102805162111234
F15B9.6	1.30916644159703	0.000895678877862576	0.0102805162111234
skr-13	0.541549824740204	0.000896466658532214	0.0102814700175189
psf-2	-0.195047589351665	0.000896892989812718	0.0102814700175189
Y58A7A.5	1.61730218784469	0.000902450096632454	0.0103386548247477
rsp-5	-0.260038581864821	0.000903495361435961	0.0103441115656595
C16A3.5	-0.188434342880735	0.000912046501249288	0.0104354420636962
lgc-45	-0.433466803293248	0.000920528890216181	0.0105258715427801
gpx-8	0.499020805817647	0.000922181420739926	0.0105381397928803
tct-1	-0.235614984766063	0.000923043844622051	0.0105413694340914
Y61A9LA.1	-0.211066463507602	0.00092857780891092	0.0105929374420483
fkh-9	0.389369191917381	0.000928724618152192	0.0105929374420483
sfxn-2	-0.31613210640439	0.000932152411304762	0.0106253686457253
lon-1	-0.357661781842852	0.000933486943782506	0.0106339136120988
igcm-4	0.42342750868888	0.000936366275006045	0.010655296291113
clec-26	0.570428221171617	0.000936536135152001	0.010655296291113
cpr-3	0.721187904606122	0.00094223988492404	0.0107080401103753
ckc-1	0.385945453442636	0.000943022698966125	0.0107080401103753
fahd-1	0.177742830635238	0.000943288123197538	0.0107080401103753
Y39H10A.1	2.6041020642023	0.000943527872879445	0.0107080401103753
pfn-1	-0.18627806459863	0.000945011294936507	0.0107181848741364
W08A12.2	0.574626667663203	0.000946739910333215	0.0107310962030974
acr-8	-0.699552718372751	0.000947642107283743	0.0107346300015737
fbxb-25	0.77492336539837	0.000960721230627969	0.0108760103947989
pals-17	0.472070204155732	0.000962816353329671	0.0108929459364572
npax-4	0.647449615184414	0.000964605478858192	0.0109064006288065
nape-1	0.468583489729307	0.000965306599033522	0.0109075446097132
Y97E10AR.1	0.92505524144943	0.000967209642853935	0.0109222599482779
E02C12.8	0.849113336061541	0.000968537428090173	0.0109304649162678
efn-3	-0.398802661673154	0.000970079774227108	0.0109410796372351
rpl-33	-0.312549440848767	0.000972428858733483	0.0109607743835297
Y60A3A.25	0.648638880360369	0.00097833449463144	0.0110205077118304
D1086.10	-0.513512760309725	0.000982990493743355	0.0110631754509522
nas-3	-2.25521386214949	0.000983339284348431	0.0110631754509522
cyn-1	-0.260456072046724	0.000984034460548709	0.0110641499859221
T19D12.5	1.52100385156957	0.00098756509864306	0.0110969845849379
Y50D4B.1	-0.503005143944883	0.000988646874103649	0.0110972498603554
rnp-9	-0.474700405832361	0.000989523823855053	0.0110972498603554
rpn-12	-0.189837935258673	0.000989679859957697	0.0110972498603554
sqst-5	-0.63491378681934	0.000990030211401821	0.0110972498603554
rpl-32	-0.329446699121341	0.000991320384108897	0.0111048650052273
cox-5B	-0.177124302366407	0.000997844923659176	0.0111710705400539
T01C3.11	1.61656285869316	0.000999572119610633	0.0111835204348559
hpo-10	-0.130065782823856	0.00100467590451935	0.0112269832249101
txt-11	-1.15959722787568	0.0010046918050123	0.0112269832249101
fbxb-1	0.739658871440933	0.00100656512431495	0.0112410076935935
ttr-7	-0.61229877003353	0.00101482630562637	0.0113263088168159
ech-5	-0.170524633977242	0.00101624897788141	0.0113352286299766
Y51H4A.7	-0.291410984862771	0.00101764491907531	0.0113438395301706
T05B11.4	-0.458663738421691	0.0010204450059082	0.0113680825076085
timm-17B.1	-0.192163247913182	0.00102208835352439	0.0113794172415351
B0507.2	0.240929238700109	0.00103275725610919	0.0114822228556665
txt-13	-0.462509347723899	0.00103325733511126	0.0114822228556665
srg-10	1.7209446862362	0.00103384669215224	0.0114822228556665
F42A6.6	0.251013427322886	0.00103384845799054	0.0114822228556665
mcu-1	-0.15495300793792	0.0010394768560493	0.0115376854211431
Y48G8AL.7	0.313028855539468	0.00104269496517832	0.0115663436009195
F43D2.2	-0.20127715666429	0.00104439238195996	0.011571790576772
C14F5.7	-2.30100661121049	0.00104467563553579	0.011571790576772
C24H12.9	0.733925897127467	0.00104531148067235	0.011571790576772
gly-8	-0.428974448001945	0.00104573191340611	0.011571790576772
rpl-36.A	-0.337278676805097	0.00105096744146782	0.011622651492291
rpl-38	-0.398926188806958	0.00105386859840611	0.0116476504484021
F54D1.6	0.489178771961686	0.00105902464788465	0.0116940673905992
dhs-20	-0.379359591569925	0.00105946086708002	0.0116940673905992
fbxb-66	0.719463046031722	0.0010602813615497	0.0116940673905992
Y57G11C.1144	0.937370545701857	0.00106092447026899	0.0116940673905992
adpr-1	0.241302854977794	0.00106141173027831	0.0116940673905992
ztf-26	-0.6067872164375	0.00106192757614428	0.0116940673905992
Y75B8A.39	2.82350182490927	0.00106614289954343	0.0117333801795394
fbxb-74	0.581076698523148	0.00106891230093909	0.0117567420105103
php-3	0.373781890987134	0.00107103533083118	0.0117729705863613
F14H3.12	0.376538594729084	0.00107739416477383	0.0118357119696393
sodh-1	0.774769441979279	0.00108023789846313	0.0118597857680906
F45D11.1	-1.62941720667599	0.00109189226888027	0.0119805029212505
clec-196	0.601413557939438	0.00109385086172578	0.0119947542322295
rpl-9	-0.38830845223295	0.0010978745246021	0.0120250099151608
F07C6.2	0.506784052894048	0.00109832456157573	0.0120250099151608
T02G5.7	0.191341106283944	0.00109923021849267	0.0120250099151608
C24H12.1	0.72398479524093	0.00109925562284788	0.0120250099151608
WBGene00002977	-0.463004559698808	0.00110447790415836	0.0120748723845479
pqn-72	-0.681243476803124	0.00110965295188876	0.0121177857578283
ril-1	-0.157882966914556	0.00110973616890073	0.0121177857578283
cyp-34A8	-0.390212428539682	0.00111965661479528	0.0122187736576189
Y71H2B.5	0.236919888435048	0.00112145705565059	0.0122303553716877
cnc-2	-0.681233987778754	0.00112267091317985	0.0122303553716877
C50B8.4	0.891430242812098	0.00112273599446382	0.0122303553716877
Y87G2A.2	-0.308424515013746	0.00112358055111109	0.0122322263471562
nhr-146	0.383476058407846	0.00112542641831584	0.0122449896537405
gar-3	-0.494874573160294	0.00113055770469361	0.012293462696791
C14C11.7	0.202217924384387	0.00113423383814912	0.0123224536645909
C42C1.19	0.195208453685994	0.00113457936497031	0.0123224536645909
K02C4.5	0.376026209054755	0.00113752484775067	0.0123442785982539
fbxb-65	0.679104857594922	0.00113794680879344	0.0123442785982539
fbxc-31	0.79563322607116	0.0011408277929937	0.0123681515232072
ZC513.3	-2.75690847492206	0.00114231170042073	0.0123715940132735
catp-7	0.370674291817933	0.00114250626193753	0.0123715940132735
lact-8	-0.731508180498527	0.00115336149023835	0.0124817055083473
F11C7.6	1.00451158690825	0.00115472967657029	0.0124890780783608
far-5	-0.546495041260913	0.00115608272136659	0.0124962782147241
pgp-12	0.680060454919713	0.00116038975295993	0.0125353809260633
ceh-51	0.560266782180131	0.00116218831712441	0.0125473549843461
acl-1	0.301310685363999	0.00116875651813548	0.0126107787870749
Y37E3.8	-0.315879798804154	0.00117481841377123	0.0126686676042555
K06G5.1	0.34306344803097	0.00117857209580801	0.0126968696144843
ztf-27	0.242380132105156	0.00117883042237773	0.0126968696144843
fbxc-19	0.670415779236292	0.00118031629593496	0.0127053467000554
rbm-3.2	-0.331551090121825	0.00118482431907194	0.0127461964540063
R09E10.13	2.27917078090175	0.00118551334930557	0.0127461964540063
atp-4	-0.201883393503729	0.00118645059452375	0.0127487341956479
B0563.6	-0.446308931919333	0.00119019932467356	0.01277882942978
frpr-11	0.664166305863157	0.00119130658031209	0.01277882942978
F22E5.1	-0.823881385710129	0.00119135998479056	0.01277882942978
nars-2	-0.214469576130147	0.0011921810339214	0.0127800963312058
fbxb-48	0.63943806868351	0.0011936171915033	0.0127867835039179
T26E3.5	0.603188488004542	0.00119421145094618	0.0127867835039179
exos-2	-0.213187627269605	0.00119856499435008	0.0128258447099934
T02H6.11	-0.156783751491981	0.00120437202530738	0.0128804045835961
T10H10.2	0.299954157779236	0.00120519870459652	0.0128816682235564
famk-1	-0.242469813038483	0.00120643254827277	0.0128872797650689
R06C7.6	0.309574060317381	0.00121121769633857	0.0129307979666068
rps-25	-0.329024676980473	0.00121897641709838	0.0130059919244517
C17B7.10	1.26357748564761	0.00122513588917397	0.0130584658652175
vab-7	0.599858296347579	0.001225330992028	0.0130584658652175
linc-21	-0.895997529345074	0.00122888614215267	0.0130886812832324
Y51F10.7	0.41905243214941	0.0012412114650108	0.0132122164200008
ugt-33	-0.863806462759841	0.00124358393549758	0.0132297247111068
gst-27	-0.382457609533355	0.00124559942433222	0.0132434170373007
F09C8.2	0.245718442928033	0.00124673643185984	0.0132453847993128
ucr-11	-0.394811614447498	0.00124725372181521	0.0132453847993128
lgc-32	-0.671565301246949	0.00124797008752119	0.0132453847993128
meg-4	-0.21633307593306	0.00124934254655455	0.0132522151918951
Y49E10.5	0.513608890846006	0.00125621824033452	0.0133173783250857
nid-1	-0.382299937272541	0.00126107374244948	0.0133590116833491
F35F10.5	-0.568570708796418	0.00126191516533784	0.0133590116833491
pcp-1	-0.260920512287782	0.00126234981970155	0.0133590116833491
C34E11.4	0.566853738603023	0.00127102950885141	0.0134430410124651
F59B1.8	0.272245334392677	0.00127250857517439	0.0134508595379335
hpo-41	-0.585234501860517	0.00127657597035511	0.0134859226647449
ostb-1	-0.181029196082861	0.00127730921449264	0.0134859226647449
W09G12.9	0.305259510469863	0.00128188026775327	0.0135263291631006
nth-1	0.166381770117003	0.00129019913367384	0.0136062125576126
lin-1	0.424756880931037	0.0012948719897146	0.0136475754463775
plc-2	0.307668875567652	0.00129672775995897	0.0136592163405644
nekl-2	0.490592155885432	0.0013006377984967	0.0136924700720721
F57G9.3	0.59963265093441	0.0013027256058148	0.0137065128699762
F07H5.3	-0.256069670251092	0.0013129115523341	0.0138056940040407
W04A4.2	-0.340690160181036	0.00131790173439134	0.0138501568976699
Y34F4.6	1.20881299608821	0.00132075899969743	0.0138721660158862
C50F4.8	-0.519135621933016	0.0013246211316941	0.013904697918782
W04C9.4	-0.375183319407371	0.00133367039880237	0.0139916108024385
cyb-2.2	-0.175436868345039	0.0013367663179387	0.0140160025527355
pals-37	3.16598528055514	0.00133905107701713	0.0140286633055925
C25G6.4	1.50287991158392	0.00133992222168153	0.0140286633055925
ZK632.11	-0.221260501140774	0.00134043309870762	0.0140286633055925
yars-1	0.245458884177753	0.00134178820125526	0.0140286633055925
K05C4.7	-0.151856253861647	0.00134183188429819	0.0140286633055925
rbm-22	-0.188302637521469	0.00134434611656081	0.0140468716926391
irg-3	-0.409557502548707	0.00134637843687239	0.0140600266288208
F13H8.9	-0.28122974206629	0.00134853403261613	0.0140744530694569
col-141	-1.19588743523385	0.00135241951210469	0.0141069071426135
cyp-13A1	1.09245840589955	0.0013568704790458	0.0141452191396398
E02C12.6	-0.852893712795019	0.00135846679398294	0.0141537448604033
eif-1	-0.198990150446401	0.00136334394837678	0.0141964240122785
rpl-27	-0.284218160261371	0.00136770533076407	0.0142336866735098
ifp-1	0.929923336388878	0.00137531866512097	0.0143047303492931
T28F3.5	0.518259320037319	0.00137823041440554	0.0143268194192722
Y54G11A.14	0.478093586502719	0.00138246698767141	0.0143626470302023
F46C3.7	1.249569226235	0.00138709765201055	0.0144025256488886
C39B5.5	-1.25260127451348	0.00139115848175402	0.0144364454091152
egas-1	-1.10364691018082	0.00139323046023856	0.0144496993711336
T10E10.4	1.03365111088138	0.00139795987907262	0.0144834004863796
cbl-1	-0.437556984279556	0.00139807314523933	0.0144834004863796
ugt-2	0.451274034016903	0.00140029829870903	0.0144981909845267
gpa-13	0.771645297538705	0.00140370337122629	0.0145251741560986
C36A4.14	0.401019969413517	0.00140462766272617	0.0145264707258387
C27B7.2	0.193765872058751	0.00142609624868266	0.0147401113685613
nlp-33	-0.67820094214599	0.00143710654419123	0.0148454739090572
pix-1	0.164561107657666	0.00144885347431187	0.0149583219854992
rde-12	-0.211489534672489	0.00145171113244576	0.0149793190119162
H06I04.6	0.296121244021744	0.00145465388487025	0.0150011697565661
fbxa-11	0.478014698520302	0.00146429250136854	0.0150920079180166
F22E5.12	1.52053167190666	0.00146593878657042	0.0151004153420038
nmgp-1	0.461081279340485	0.00147280302000804	0.0151625321102866
pqn-51	-0.221335620227035	0.00147900881656212	0.0152178037882943
ZK858.10	-0.221770156756259	0.00148341617856954	0.0152545189720435
T21D12.14	0.856897438938034	0.00148954139012176	0.0153088479444905
klu-2	0.482669099889864	0.00149424231857034	0.0153484856462866
pcbd-1	-0.222763113872279	0.00149515916797808	0.0153492314133312
tomm-7	-0.370630804700803	0.00150249395518498	0.0154158253945926
srd-50	3.15292834821466	0.0015033703470288	NA
ule-4	-0.402802849354039	0.00150608224856156	0.015443926317596
ugt-10	-1.7302803385455	0.00150839997421953	0.0154503230564918
nhr-226	-0.493663428095331	0.00150840566664501	0.0154503230564918
T20D4.3	-2.21253448845365	0.00151303913722091	0.0154890566181381
F17A9.4	0.286704076289827	0.00151793551437463	0.0155304364585511
ddp-1	-0.253533533385725	0.00152013411809283	0.015544183577641
fbxb-63	0.504231017912257	0.00152219107851671	0.0155564676776348
mlc-1	-0.506587531078926	0.00152385360098499	0.0155647091682629
Y38E10A.28	0.569315835569709	0.00153080315289487	0.0156269130391812
mina-1	-0.275603686075018	0.00153205633510042	0.015630929421134
tbb-1	-0.251980414759496	0.00153558173005661	0.015658110731441
cyp-35A2	-0.560351283419104	0.00153887482446819	0.0156748378255789
W06H8.6	0.349641710666595	0.00153894645611674	0.0156748378255789
ifc-2	0.340994884376745	0.00154523016653141	0.0157300278038676
F26G5.1	-0.20200540409538	0.00155086158809372	0.0157737918727134
cdh-10	-1.42450190109065	0.00155126449966512	0.0157737918727134
lips-10	0.581393438555083	0.00155828369372869	0.0158363084604144
W02F12.1	-0.290714918157954	0.00156030592822008	0.0158480011625526
xdh-1	0.548457436472527	0.00156320878015762	0.015855231868746
bath-6	0.288224933034744	0.0015633631546925	0.015855231868746
pax-3	0.65281358133259	0.00156363405426883	0.015855231868746
ZK829.9	-0.21376002650374	0.0015701182106695	0.0159121065708931
ifd-2	0.513036876231746	0.00157707566767304	0.0159737118183641
tomm-40	-0.246273932956705	0.00159213936474346	0.0161173083465483
math-24	0.52200628369678	0.00159333469542188	0.016120432998033
clec-85	0.490227676438085	0.0015968714137459	0.016147229796059
K08D8.12	0.895235559662207	0.0016005394937405	0.016173203512411
cey-1	-0.192335173016002	0.00160121920259281	0.016173203512411
ZK1240.3	0.362117798962842	0.00160332676458692	0.0161736803814945
F55C9.3	0.786351806555854	0.00160385423009829	0.0161736803814945
F18A11.5	0.497403400711684	0.00160393519211455	0.0161736803814945
Y110A7A.21	0.428333935419372	0.00161502145297822	0.0162764440335904
K10H10.10	1.87346727072501	0.00161948131584034	0.0163123489214921
col-92	-1.09342886154608	0.001627633159309	0.0163853812122907
DC2.5	-0.358026936041687	0.00163115220790031	0.0164117201393666
rps-9	-0.292189564939461	0.00163361886380489	0.0164274472139584
T25G12.6	-0.362841631427045	0.00163711651162689	0.0164529771200037
C24H12.18	0.828398893005613	0.00163796758083751	0.0164529771200037
clec-149	-0.277347524023015	0.00164170939756716	0.0164814569614404
gfat-2	-0.282489239305052	0.00164412786501353	0.0164966273255028
elt-1	0.338003635183676	0.00165076973586554	0.0165470777936182
F11A5.9	0.426133977692112	0.00165097624540033	0.0165470777936182
K06A5.10	4.51881862455465	0.00165444647248283	NA
cdr-1	-0.758826451450689	0.0016552841581661	0.016581113652682
dph-3	0.261739502702802	0.0016575268682455	0.0165944361187067
sra-14	-0.523316615471817	0.00166611169062027	0.0166712034381767
D1005.4	0.505049972050633	0.00167263379425714	0.0167272579831623
ech-8	0.322364058687017	0.00168347503019633	0.0168264208488178
cnnm-3	-0.334741295172826	0.0016859573449998	0.0168340958707439
F52E10.4	0.556818571172825	0.00168609474619794	0.0168340958707439
toh-1	-0.414558059853577	0.0016871940103851	0.0168358256327176
C10E2.5	-0.852905866731453	0.00169461532400077	0.0169006040623467
nhr-68	0.261692473004157	0.0016964024417746	0.0169091517510438
T19D12.2	-0.351661140420747	0.00169755567981968	0.0169113752409872
Y54G2A.20	0.733519948836932	0.00169901737883692	0.0169166675600406
pstk-1	0.301478392102284	0.00171591638949226	0.0170755751928619
C53C11.1	-0.590922184504034	0.0017292122493906	0.0171974840066632
F32B4.5	0.728836335467719	0.00173087429693532	0.0171974840066632
kcc-2	-0.191290865350775	0.00173100466048037	0.0171974840066632
F10E7.2	-0.3412287214671	0.00173385368959041	0.0172103706637488
best-14	-0.461615453002812	0.00173419498685374	0.0172103706637488
lgc-34	-0.431978315645529	0.00174460301666631	0.0173042157370487
T10C6.10	-0.202554947771766	0.00175684699995638	0.017416158836536
fbxa-79	0.613494763447906	0.00176444111484507	0.0174819094871925
ugt-44	0.814508227298699	0.00176693351739238	0.0174970687797989
ugt-28	-0.344950874732191	0.00176852353179674	0.0175032805289039
sax-1	0.197292448997282	0.00177482106768383	0.017556051050903
T23F4.2	0.482584511410102	0.00178235421781464	0.0176209798989059
F31D5.1	-0.762743984818999	0.00179153466877445	0.0177021151157545
wht-1	0.473151585683075	0.00179316137586656	0.0177085643534112
R08D7.7	-0.504675842015308	0.00180310297272458	0.0177970766270932
mff-2	-0.213670040486969	0.00181123662931941	0.0178676577089833
elt-2	0.355617606609838	0.00181223886469674	0.017867849674106
EEED8.4	0.430848487169364	0.00181424931230403	0.0178779765566393
mex-5	-0.209050068341845	0.00183029434532937	0.0180236422643271
tba-9	-0.541992489732096	0.00183101409505594	0.0180236422643271
srr-6	1.76038504687613	0.00183537203995271	0.0180567635597296
C25F9.10	0.428231290627023	0.0018383618278246	0.018076396101503
pbo-6	-0.682474504377133	0.00184035070967301	0.0180861709473324
C15B12.1	0.376181451902536	0.0018451791728893	0.0181238263329553
EEED8.15	0.395690438034064	0.00184636983689739	0.0181257289441854
ubq-1	-0.165629379979466	0.00185004229292572	0.0181519799933527
scav-5	-0.526553575500668	0.00186064435942653	0.0182461570111833
cct-5	-0.226957448822364	0.00186210707376763	0.018250656985536
lron-3	-0.356555771386855	0.00186887031345178	0.0183070749832257
fbxb-108	0.534652280344254	0.00187201525698498	0.0183280072090705
F13B12.1	0.116348386916103	0.00187323996436251	0.0183301269063912
K07F5.16	0.352261928334587	0.00187438096292757	0.0183314256519559
col-142	-1.02481353578709	0.00187907760029868	0.0183674784145324
Y57A10A.4	0.282338263303922	0.00188586156613578	0.018423884542673
ckb-1	0.347711717154209	0.00189362905438041	0.0184898334251827
prmt-1	-0.320210588455175	0.00189517308386619	0.0184949768318686
C46C11.3	-0.465033713998024	0.00189620185450238	0.0184950890111093
T11G6.2	-0.171811691610493	0.00190644548544132	0.0185850323704067
kgb-1	0.221336954231569	0.00190878695880393	0.0185881506380125
snr-4	-0.217390802987591	0.00190881014472083	0.0185881506380125
ddl-3	-0.177681595472503	0.00191704115722919	0.0186583111775075
F02E9.5	0.208235066859936	0.00192757847048856	0.0187413487656251
fbxa-216	-0.353659360598925	0.00192763446409543	0.0187413487656251
tir-1	0.306465604155548	0.00192884025205343	0.0187430489698469
Y45G12B.3	-0.221993224670917	0.00193019534482793	0.0187461974168358
C17G10.1	-0.194118575112724	0.0019464196195947	0.0188936759764289
K05C4.9	0.483772186507883	0.00195161852942592	0.0189340322750761
R04A9.9	-0.564001300990086	0.00196305150705292	0.0190195693888302
lect-2	0.440601287067799	0.00196390628209825	0.0190195693888302
K11H12.3	0.855284540792329	0.00196549389768392	0.0190195693888302
nfya-1	-0.215489995152939	0.00196564769726745	0.0190195693888302
F58G6.7	-0.375634625653418	0.00196566585345206	0.0190195693888302
col-153	-0.410773056738725	0.00196775856137292	0.0190249855651214
C29H12.2	-0.133226508182349	0.00196831845597015	0.0190249855651214
Y71F9B.13	-0.407579097188032	0.00197041163219456	0.0190269894215014
M199.9	-0.876957448466879	0.00197061883728547	0.0190269894215014
C07D8.6	-0.222807543323979	0.00197273332635762	0.0190372954386985
xol-1	0.450648811601113	0.00197800601866061	0.0190780516844926
K03B8.6	-0.574609150658601	0.00198015300823227	0.0190886330024766
C40A11.4	0.705603171420431	0.00199345875427277	0.019203398372784
bckd-1A	-0.252205560123641	0.00199417062470801	0.019203398372784
F20B6.9	-0.673578198383612	0.00199662532209789	0.0192168581159671
Y71G12B.13	-0.222817601412682	0.0019993948163571	0.0192333318286711
K08D8.1	0.783102637684474	0.00200216217000646	0.0192497675372224
mtl-1	0.801711791843607	0.0020044985430029	0.0192620444029259
unc-95	-0.488269315622016	0.00201007735735444	0.0193054497802753
Y41D4B.15	1.72343251424661	0.00201616490246344	0.0193479729203881
Y52E8A.2	0.257045863352126	0.00201663322612263	0.0193479729203881
C37C3.18	0.204158505271006	0.0020182720224648	0.0193534829327176
vet-1	0.473881868763656	0.00202670729158457	0.0194196067768599
nas-22	-0.962984473368552	0.00202730398011551	0.0194196067768599
daf-41	-0.207218608292423	0.00202850417913168	0.019420871237911
F48A9.6	-2.28982760976138	0.00203006107219319	0.019425547554497
lido-15	0.577827140672169	0.00203843497259568	0.0194954162213372
T05F1.9	0.988446322740362	0.00204593636059802	0.0195440645310434
B0310.1	-0.495470389579415	0.00204637161046243	0.0195440645310434
let-522	0.510903219319277	0.00204674654128522	0.0195440645310434
bir-2	0.178851552413194	0.00204901786741683	0.0195554823346485
lys-1	0.292700333461793	0.00205188450882423	0.0195725667654424
rft-1	-0.360593732935472	0.00205299299310424	0.0195728713202035
sulp-2	0.383706898761177	0.00205557368464671	0.0195872039625586
C44C10.9	-0.429503218274088	0.00207918712629146	0.0198018340194369
T19E7.6	0.621356297816663	0.00209349292216634	0.0199276412659195
ubc-7	-0.173219746818612	0.00209812532646263	0.0199612854842581
C17F4.2	-0.816274804042033	0.00210142361300977	0.0199822085293571
W09D10.4	0.197620657100506	0.00210366511828697	0.0199930661346447
clec-24	1.65956916106628	0.00211761927895699	0.0201151703817749
clec-258	-1.39708753030298	0.00212110173445179	0.0201275085565977
T20B3.1	0.340634361197172	0.0021221527492676	0.0201275085565977
C38D4.7	0.448809938309324	0.00212314066556873	0.0201275085565977
R03G8.6	-0.570397294329032	0.0021235269807282	0.0201275085565977
Y42H9AR.5	-0.74945614088362	0.0021244534910132	0.0201275085565977
gst-24	-0.638507238155797	0.00212784402018043	0.0201491313181773
nuo-2	-0.164179404618314	0.00213541949877263	0.0202037206685844
bcat-1	0.228078443925681	0.00213583142429015	0.0202037206685844
col-107	1.65157500249411	0.00213701638038879	0.0202044174788604
ard-1	-0.162353945469087	0.00214083621235283	0.020230012046147
sto-5	-0.5610818033852	0.00214706318451879	0.0202723466847191
hsp-4	-0.164869660147113	0.00214754632389687	0.0202723466847191
vit-3	-0.30967320468271	0.00215502298541984	0.0203323678764495
kynu-1	-0.392259381983726	0.00216060700388867	0.0203744792207987
T20F5.5	0.51757710568883	0.00217527248347847	0.0205021404987672
fbxb-35	0.591006554950589	0.00218494342939921	0.020582619942957
mbr-1	-0.410362145389786	0.00218647450602439	0.0205863764857739
F40G12.5	2.14191001893082	0.00219387151280362	0.020641276671802
rps-8	-0.250338034887436	0.00219457608528647	0.020641276671802
ser-7	-0.385683068548967	0.00219732147613612	0.0206564124910191
C48B6.2	-0.199662331883573	0.00220024778695908	0.0206644890895172
sdz-21	0.416072046764251	0.00220045381867363	0.0206644890895172
imb-2	-0.235968883924068	0.00220162794635742	0.0206648413488509
C44B7.7	-0.347002515569109	0.00221261749121981	0.020757274823461
R05H10.1	1.44867091494129	0.00221667399093353	0.0207846053786294
T22F3.2	-0.167118146644104	0.00222310418278281	0.0208341531686465
madf-6	0.168824878901697	0.00223513682773781	0.0209361270814535
C07D10.5	0.429728772346064	0.00223702994811133	0.020936607085779
C48B4.7	0.200522846693264	0.00223773379191687	0.020936607085779
K11H12.7	-0.426642977740889	0.00223913580824568	0.020936607085779
K11D9.3	-0.340372588891044	0.00223979433374623	0.020936607085779
F13H10.8	0.149832847461315	0.00224308393842731	0.0209565822633849
rpi-2	0.67665867308069	0.00224426295305506	0.0209568283253694
21ur-8849	2.0435979785135	0.00224632475000004	NA
glc-4	-0.539306404510334	0.00224719244334872	0.0209734116080714
Y55F3BL.4	0.226545781733178	0.00224936337941854	0.0209829017964128
sri-36	4.98877308576425	0.00225123439931489	NA
Y51F10.2	-0.242932492104608	0.0022519990461076	0.0209967152088627
lpd-9	-0.181005278863532	0.00225546647163314	0.0210182654642553
rps-1	-0.258115638936669	0.00225844620708852	0.0210352512761661
Y37F4.8	0.776562018290209	0.0022596777705624	0.0210359454923682
lmd-4	-1.26594579888383	0.0022638392393767	0.0210639003127471
gnrr-3	0.796544646150445	0.00227018507842438	0.0211121406193522
par-5	-0.164675221565529	0.00227611490383601	0.0211564647579972
ZK1128.7	0.412089542692759	0.00227766635378116	0.0211600674389858
cgt-2	-0.399872476628056	0.00227919025710659	0.0211634106560035
let-268	-0.26169781754453	0.00230600845560351	0.021401500628549
poml-4	-0.801266603702049	0.00231042921310447	0.0214315885323737
srv-7	0.517071656418112	0.0023350756671824	0.0216491640515264
F44E5.1	-0.217102981269336	0.00233731049276609	0.0216588389750154
W01C9.2	1.34325921641226	0.00234069857949646	0.0216791853661871
ZK686.3	-0.138865434241617	0.00234276021332471	0.0216872318933078
fbxb-44	0.574089336836015	0.00234560301350897	0.0216917322314983
F30A10.13	-0.48876418561352	0.00234563255965709	0.0216917322314983
Y57A10A.14	0.451430646042566	0.00235195750037506	0.0217391658944174
ears-2	0.178880352586474	0.00235526525760705	0.0217586776669481
F58A4.2	-0.246026103430649	0.00235721399282771	0.0217656209261557
T12A2.3	0.497087144423937	0.00236166853643656	0.0217956830766259
F17C11.13	-0.476645936290957	0.00236791085780093	0.0218422056345402
ZC53.1	-0.309775229856129	0.00237572283182342	0.021903152538226
tra-1	0.350039783783198	0.00238919379436136	0.0220161846808332
col-159	-0.93879984715348	0.00239188112194757	0.0220297825117167
C53C11.2	-0.637993824998669	0.00239559512375289	0.0220528176936462
hsp-25	-0.346059583534103	0.0023979685318943	0.0220634948777177
zyx-1	-0.403317240710341	0.00240153544051265	0.022085136997451
irg-4	-0.493537557943041	0.0024038479819789	0.0220952275835988
eif-3.L	-0.245982838111506	0.002405766842702	0.0221016912416195
mtp-18	-0.334138260920642	0.00241093064775926	0.0221379444984399
B0491.7	-0.294405086322953	0.00241699816149726	0.0221824551106419
fbxb-88	0.663258162225421	0.00242510490695815	0.0222412626154336
K12H6.7	0.527787192964107	0.00242585247051344	0.0222412626154336
lin-14	-0.383686289490039	0.00242893827357738	0.0222546510333488
dif-1	-0.149725078651453	0.00242976086580481	0.0222546510333488
wrk-1	-0.222175658153538	0.00243620481247646	0.0222989815068435
ceph-41	-0.69585910965884	0.00243705386139915	0.0222989815068435
tbx-11	0.43258275804224	0.00244245713036167	0.0223371796212805
F14F7.5	-1.33692518910553	0.00245053773239231	0.0223998122235418
unc-98	-0.428981466322657	0.00245387228115051	0.0224190210771846
T19H5.5	2.9647009842429	0.0024618445932917	0.0224805607989133
Y113G7B.14	0.70216139793063	0.0024744382067054	0.0225842173876059
C48E7.1	-0.356559838685147	0.00249643968003136	0.0227735924850226
[truncated: 28,058 more rows]

## Sheet: 50ppm 12h vs Con 12h
	log2FoldChange	pvalue	padj
R08F11.4	4.44404337509675	2.5350637947038e-76	4.75223058955174e-72
semo-1	2.44879784189797	1.26193264179133e-56	1.18280946515102e-52
R08E5.3	2.55478023800536	3.35356787580042e-52	2.09553277999182e-48
gst-19	5.43927790806035	3.45895650169345e-48	1.62103996451864e-44
sqrd-1	2.05666224447116	6.66846798038359e-45	2.50014201520541e-41
str-245	-1.95542651366564	7.12882663351749e-44	2.22728306786531e-40
hgo-1	-0.798174381282359	1.14787468687047e-39	3.07400841143911e-36
ugt-2	1.6783813763536	1.81211001324939e-38	4.24622678854664e-35
F42A10.6	-1.11619438028024	5.31859407914969e-37	1.10780405119711e-33
T12B5.15	-1.46172008335009	1.47811287179809e-36	2.77087038947271e-33
R06C1.4	-1.25077930163854	7.94161153356994e-36	1.33139055240613e-32
ilys-5	-1.03213169119225	8.52271771517845e-36	1.33139055240613e-32
F54F7.6	1.06147780155619	4.04373407684203e-34	5.83106453880621e-31
sto-4	0.895144838720618	1.90426871669972e-32	2.54981581166093e-29
nhr-202	1.23227009157101	2.89151333851035e-31	3.39070870190202e-28
nhr-65	0.879868759997044	2.89402215034846e-31	3.39070870190202e-28
asp-14	-1.30885912715705	7.87214662653331e-29	8.68066239182314e-26
nhr-156	1.91148954579165	2.25204415465317e-28	2.34537887350713e-25
F56D5.4	-0.653877231696966	4.22199639735311e-28	4.1655549718306e-25
smd-1	-0.956387449938732	1.41669546820919e-27	1.32786866235247e-24
R03D7.2	-1.11585934693007	1.56601621431674e-27	1.39793047398008e-24
clec-80	-1.22159864268675	1.03806510455476e-26	8.84525838635619e-24
mom-1	0.778820989671418	1.36644147532303e-26	1.11370921288719e-23
nhr-14	0.964243612651857	2.75253957050257e-26	2.14996278286005e-23
pcp-2	-1.56518073289569	9.24425974406523e-26	6.93171572648987e-23
C18H9.6	1.02142089738265	1.56176759886364e-25	1.12603443878068e-22
ZK550.2	1.2540856748138	3.48206534602286e-25	2.41758507320535e-22
cest-3	-1.15736586878094	7.54802229131378e-25	5.05340092403458e-22
clec-70	-1.96904041889188	2.05078880591641e-24	1.32565817088652e-21
F54B11.11	-1.58016519974053	3.1902969984903e-24	1.99351025112331e-21
F44E5.5	2.43417265909664	5.61912552549302e-24	3.39793958389974e-21
prx-11	0.786658672310814	2.47945395140422e-23	1.45249511790698e-20
ceeh-2	0.880946278603234	9.06235239921493e-23	5.14796539623282e-20
Y32F6B.1	1.45995051318538	1.58802864095213e-21	8.75564261861432e-19
fbxa-156	1.07531954100405	2.5285549986411e-21	1.35429405727218e-18
cpr-1	-1.4282688755032	2.96684983175021e-21	1.5449046373886e-18
R10E8.7	-1.30894536534343	3.80004479429429e-21	1.92528755983353e-18
F28B4.3	-0.822773787431197	4.10209852145664e-21	2.02362997061122e-18
glo-3	1.18392491267411	1.3803105321356e-20	6.63469262446511e-18
fbxa-82	3.19153956440326	2.81334625436123e-20	1.31847472210639e-17
snf-1	-0.439126947470517	4.56447338560797e-20	2.08696629479529e-17
fbxc-58	3.70245052768087	4.81422285311588e-20	2.14874813344072e-17
C10C5.4	1.02461460016218	5.83525231203743e-20	2.54389860096404e-17
smf-3	1.90736374940411	9.018344770362e-20	3.8422247969365e-17
sdz-6	2.93102982593478	9.31382630490999e-20	3.87103812262246e-17
clec-218	0.905741715580538	9.49897330847292e-20	3.87103812262246e-17
E02C12.8	2.10841745069459	1.00463628925845e-19	3.97255489505997e-17
F10A3.4	-1.40394155150053	1.01719105389352e-19	3.97255489505997e-17
F55G11.8	-0.905930469058515	1.10267892073365e-19	4.21853449960674e-17
hrg-1	1.24341850489554	1.68542041760999e-19	6.31897822970338e-17
F28H7.3	-1.01172118536566	1.84475643312582e-19	6.78074590105425e-17
ttr-37	1.63005569485143	2.34884705288652e-19	8.4675936256559e-17
abhd-5.2	1.16712101420553	2.78085594229076e-19	9.83583499890239e-17
zipt-2.1	0.845340674498201	2.92051137146338e-19	1.01385011424912e-16
clec-67	-1.35866029795749	3.5533662392e-19	1.21111642763715e-16
F42A10.7	-1.50314778831411	3.63060515075408e-19	1.21534507421493e-16
C42C1.19	0.48211571781209	3.90534588521909e-19	1.28437919235644e-16
prk-2	0.790669355373114	4.55976032948385e-19	1.47374598511214e-16
F49E2.2	-0.582618312122649	6.65214694833399e-19	2.11357875751642e-16
cpx-2	-1.10607584712265	8.26920791080122e-19	2.58267930975703e-16
col-110	-3.01257033669386	8.40410956444996e-19	2.58267930975703e-16
sid-5	0.639998407262616	8.73088461304592e-19	2.6398252089703e-16
ctsa-2	-1.17348444974847	9.16057649806694e-19	2.72578042909148e-16
spp-4	-0.787340813785335	1.06525166247846e-18	3.07769041100416e-16
C03B1.13	0.618939982630757	1.0671603366866e-18	3.07769041100416e-16
clec-10	-0.933163158382039	1.14588064497183e-18	3.25464826827908e-16
nhr-84	0.861915983268331	1.17415485935696e-18	3.28518014828443e-16
C49A9.5	-1.8553214396585	1.23258366400392e-18	3.39794314197317e-16
oac-6	1.79386533179483	2.821049672719e-18	7.66426045866527e-16
sesn-1	-0.847027864880705	3.11159609442588e-18	8.33285434087252e-16
F40B5.2	0.473163301888967	3.38018382775573e-18	8.92463746973366e-16
gly-11	0.645137697419731	3.84581533706849e-18	1.0013007542873e-15
ZC328.3	1.09489940014583	4.07827988047925e-18	1.047279926568e-15
gly-13	0.477702597624303	4.70494335595329e-18	1.19187659663109e-15
Y61A9LA.1	-0.491186627753564	5.91839964343759e-18	1.47928426287841e-15
C09G5.14	1.77301051946549	6.71169524195656e-18	1.65549261849628e-15
sars-2	-0.412585413776052	6.81736429872807e-18	1.65971832654489e-15
tsp-10	-0.722817267705921	7.34670461940049e-18	1.76565801019592e-15
F56D2.5	1.93008436209211	1.0949643163937e-17	2.59825330064764e-15
cox-16	-0.773594012791954	1.38164999547117e-17	3.23755135188782e-15
rhi-1	0.429799922820432	1.58417607987341e-17	3.66629194979098e-15
F38B7.3	0.579514025373672	1.80997532077469e-17	4.13778016624905e-15
E_BE45912.2	-0.520016203659133	2.34809333494406e-17	5.30329610323631e-15
ZK593.3	1.27152468470475	2.56867899478318e-17	5.73243529002446e-15
miz-1	0.33334894397458	2.62397859274911e-17	5.78695325878527e-15
T12B5.14	-2.15615807078902	2.70413712235208e-17	5.89439005762932e-15
set-23	-0.459124319287855	2.76609188337852e-17	5.96013315469123e-15
nspe-5	-3.04381211845139	2.95437014797228e-17	6.29347986294186e-15
E02H4.6	0.493094496942236	4.51153163827157e-17	9.50260360573471e-15
ugt-51	1.4413161883144	4.71705091942425e-17	9.82509294839188e-15
hpo-15	0.708469738453477	5.06971698258827e-17	1.04436169841318e-14
oac-54	-1.24944021362816	6.08982391100432e-17	1.24086781560529e-14
C14C11.4	-1.21615808660972	6.61526254575557e-17	1.3334377600294e-14
M05D6.3	3.140818405163	8.64589189750248e-17	1.7242115905381e-14
T05E12.3	1.15946937879967	8.79790568567236e-17	1.73605831561699e-14
nas-20	-1.44863482538121	1.02060231766908e-16	1.99293865073173e-14
fbxa-54	-1.36459908228488	1.16237785423928e-16	2.24638507789377e-14
F43C9.1	-1.62640786198964	1.39337217299681e-16	2.66532191377533e-14
irg-2	4.5391412465291	1.54663498083945e-16	2.92860801523398e-14
cyp-29A4	-1.75028303290042	1.93333714118953e-16	3.62423380487389e-14
ugt-65	-1.81396507869717	2.22571055034931e-16	4.0942452097067e-14
T22F7.1	-0.659300966531382	2.22774464627165e-16	4.0942452097067e-14
F14F9.4	2.95497319455603	2.76507947254769e-16	5.0324446400368e-14
clec-172	-2.38281988929741	5.17518489257599e-16	9.2746195970033e-14
T28F4.4	0.945016805969893	5.19798193932502e-16	9.2746195970033e-14
egli-1	-0.484463550384643	5.24437041119358e-16	9.2746195970033e-14
C39H7.4	-1.04181288711822	6.72903945482884e-16	1.17890255719833e-13
F43H9.4	-1.48416831025693	7.25432769626086e-16	1.25916321290839e-13
K10C2.14	-2.31213714601859	7.55545964674899e-16	1.29940042695373e-13
T12A2.3	1.16499395436842	9.1537047095481e-16	1.55995771350171e-13
cbp-3	1.1233516682598	1.0045915757183e-15	1.69658321427165e-13
WBGene00015674	-1.46272659472378	1.62886592458681e-15	2.72631434127717e-13
math-41	-1.0976891192456	1.6593339380243e-15	2.75273221258438e-13
F32A5.4	1.00720190526106	1.95452101302275e-15	3.21398692194074e-13
spe-6	0.776513982743342	2.13663992956332e-15	3.43155906762394e-13
lrg-1	-0.618573869131207	2.13900651853623e-15	3.43155906762394e-13
acox-3	1.00404787491079	2.14174976481383e-15	3.43155906762394e-13
F21D5.3	-0.798451197438525	2.19924231942283e-15	3.49381326439833e-13
lonp-2	0.676508410080974	2.24009069385802e-15	3.52880169303045e-13
ftn-1	-1.71816815520683	2.60582173586139e-15	4.07072785503814e-13
C10C5.3	1.20710223087131	2.69539339506567e-15	4.17585492428934e-13
abhd-5.1	1.5383291436097	2.7840450686648e-15	4.27784498829429e-13
rbm-3.1	-0.730501782959652	2.81499037372156e-15	4.29022841835645e-13
cyp-33C8	1.40165958029665	2.85704040738271e-15	4.30744689266318e-13
rpl-24.2	-0.51477970407642	2.87224400716365e-15	4.30744689266318e-13
gsto-1	-0.995027224278403	3.10359790397441e-15	4.61746399269081e-13
hpo-12	-0.480220861127066	3.35691093124438e-15	4.955011993473e-13
gba-2	-1.22693900720597	3.56584755995771e-15	5.22229518429431e-13
sysm-1	1.43200618413479	4.16489944176254e-15	6.05234146785121e-13
ugt-26	2.00205033491498	4.94195241834466e-15	7.12629538725299e-13
fbxa-37	1.80756996642232	5.38980909264231e-15	7.71277566799029e-13
ugt-4	1.36054093168383	5.46073750604937e-15	7.75507464306072e-13
asp-12	-1.47900025953259	5.56626589023695e-15	7.83592989389464e-13
spin-1	-0.98401812541483	5.60127283570832e-15	7.83592989389464e-13
metr-1	0.645513498377473	6.04365656281022e-15	8.39217673529187e-13
gst-20	-0.884682290461287	6.31411951722324e-15	8.70327091690198e-13
F54E4.2	-1.87184715421616	6.4181569980696e-15	8.78210007925641e-13
B0272.4	0.651314037346926	7.18449185902261e-15	9.71069238503007e-13
nep-22	-0.773495833526262	7.2804184534147e-15	9.71069238503007e-13
C17H11.2	0.374619108556171	7.28581078366578e-15	9.71069238503007e-13
ugt-53	1.32683052073738	7.30399885996607e-15	9.71069238503007e-13
lin-18	-0.77467523825695	8.63827806637227e-15	1.1403743706494e-12
ppm-2	0.232698549165405	1.00618567435599e-14	1.31622195409828e-12
col-10	-2.57772457451478	1.01107415656755e-14	1.31622195409828e-12
memo-1	0.783694553267674	1.06685223162231e-14	1.37925599544771e-12
M162.5	1.1517426645111	1.11942085983777e-14	1.43730571496704e-12
ctl-2	0.578514144563587	1.14646611915921e-14	1.4620172700516e-12
ZK1236.8	-1.35067884448491	1.15943177684715e-14	1.46856135734977e-12
clec-57	-0.885871624232155	1.19390448334473e-14	1.50207607011948e-12
T03E6.8	-0.9687585601074	1.3650587616304e-14	1.70595943636823e-12
nhr-114	-1.01861197870172	1.57163139722641e-14	1.93998647751424e-12
Y46H3C.5	1.04583891946816	1.57301794826717e-14	1.93998647751424e-12
F07F6.8	0.521355713918545	1.84566328059883e-14	2.26135972928795e-12
ztf-20	0.435028817632911	1.87633289747202e-14	2.2840088633773e-12
nmtn-1	-0.916017732334933	2.02993712633306e-14	2.45504524969288e-12
M04C3.1	1.28450191037171	2.06006361935904e-14	2.47550978259644e-12
col-166	-1.86533188257427	2.08693510516671e-14	2.49182710072963e-12
ugt-17	0.717503044160405	2.30120615252429e-14	2.73027914779875e-12
B0019.2	0.483455759849456	2.41149595999081e-14	2.84313857018791e-12
enu-3.2	-0.615200498541153	2.66593570908548e-14	3.12347692515727e-12
Y45G12C.1	1.33281795941186	2.70561723504514e-14	3.15027954584821e-12
F10E9.2	-1.09466695892321	3.13820032606593e-14	3.63140143903901e-12
rps-1	-0.573797629552175	3.18342371379662e-14	3.66113257293444e-12
atg-2	0.822508197862227	3.42631377542989e-14	3.9164437825737e-12
Y27F2A.6	1.06308007730934	3.45361675311713e-14	3.92372725175355e-12
Y16B4A.2	-1.03560785645681	4.17847994298485e-14	4.70370924825296e-12
M02E1.1	0.55663805247127	4.19033097438517e-14	4.70370924825296e-12
math-27	0.808942844283436	4.37760804460473e-14	4.88468097643811e-12
F54D5.2	0.437976433845611	4.42466948698813e-14	4.90797953864376e-12
C52B9.4	0.314087697229879	4.86584029133198e-14	5.36559071184172e-12
scav-4	-1.4356395944584	5.5774323359163e-14	6.11430096895245e-12
myo-6	-1.05987444482003	5.91525610660414e-14	6.446941335721e-12
bcmo-2	-1.04557751888553	6.16900029209047e-14	6.65825657447535e-12
nstp-1	-0.480072068865679	6.18018053962825e-14	6.65825657447535e-12
Y58A7A.3	2.56516243893995	6.35345643056547e-14	6.80582252842173e-12
Y9C9A.8	-1.75991366937977	6.65497617659315e-14	7.08495939357076e-12
C50B6.7	-0.85720732824956	6.68962878833897e-14	7.08495939357076e-12
hpo-10	-0.265834640529401	7.11091484599788e-14	7.4888320057908e-12
nhr-203	1.0381426892107	7.21252025477392e-14	7.52789349352049e-12
eif-3.E	-0.405050337663872	7.26803210605787e-14	7.52789349352049e-12
fmil-1	-1.03203684729185	7.26847712753232e-14	7.52789349352049e-12
C49A9.4	-1.03595752314885	7.4531850472202e-14	7.67678059863681e-12
D2063.1	1.32844539917463	7.5068599264151e-14	7.68981399893866e-12
F19H6.4	0.551163796570368	7.83930708344532e-14	7.98672014055793e-12
dhs-18	0.761158261906007	8.06365980314364e-14	8.15747444542859e-12
B0507.2	0.494544358051453	8.09394135735473e-14	8.15747444542859e-12
pho-11	-0.935012009858636	8.2938396233053e-14	8.29841084339993e-12
C45E1.4	-1.07092489736929	8.32231536626047e-14	8.29841084339993e-12
C17H12.8	-0.954642349156104	9.42642380932464e-14	9.34961591161903e-12
C49G7.10	3.07776479283429	1.00229037967936e-13	9.88891339866804e-12
sulp-8	0.814237568772859	1.01468815445254e-13	9.95881892322894e-12
ZK856.11	-0.446217393441044	1.04644536028836e-13	1.02170128770654e-11
ets-4	-0.841507376475684	1.17894175914724e-13	1.14510063300385e-11
crp-1	0.803955031498945	1.25170500249757e-13	1.20950834932059e-11
F58F9.4	-1.34181824372617	1.28329083070452e-13	1.23367025191728e-11
slc-17.4	0.759677546181688	1.3052629960206e-13	1.24839082262256e-11
B0250.5	-0.347587802920995	1.43265709494159e-13	1.36327867521701e-11
fbxa-79	1.30471669880601	1.56598872025669e-13	1.48262750252182e-11
F13H8.8	1.20549679248877	1.57446311891904e-13	1.48316008177168e-11
C50F7.6	0.98390895043151	1.62632342341216e-13	1.52221622770973e-11
F58A4.2	-0.533191786372768	1.63253730895801e-13	1.52221622770973e-11
xbp-1	0.569028739082464	1.64028420995074e-13	1.52221622770973e-11
H05C05.2	0.385030257690055	1.66024737872487e-13	1.533152579388e-11
F45D11.1	-3.39636994272638	1.69765206659683e-13	1.55688384189799e-11
mop-25.1	0.364652257438116	1.70255621246713e-13	1.55688384189799e-11
adm-2	0.37796489422696	1.71124012096634e-13	1.55722851007937e-11
gad-3	1.08046524675994	1.77090576780367e-13	1.60373910740326e-11
catp-7	0.75049776167228	1.87955846899089e-13	1.69395207017804e-11
R08E5.1	1.22137816169212	2.04129132614525e-13	1.83091134927841e-11
T19C4.5	1.34298588493474	2.26843640197756e-13	2.02495756149864e-11
F35D2.3	1.07713332425529	2.28411703493909e-13	2.02929184535394e-11
F33H12.7	3.59182848592526	2.37857018137721e-13	2.09414703676342e-11
hsp-70	2.36091242363254	2.37945865160892e-13	2.09414703676342e-11
M05B5.4	0.529456796691338	2.92003822098947e-13	2.55789890143311e-11
his-60	0.564421165227734	3.06444499605516e-13	2.6719109719093e-11
Y58A7A.5	3.17586377649316	3.25534607451644e-13	2.82521840337431e-11
dnj-7	0.344197787926126	3.69015142777995e-13	3.18781468503055e-11
ipla-2	0.621738671619339	3.84832400985789e-13	3.30920559122918e-11
amt-4	0.988006636135188	3.93525523879298e-13	3.35598605726293e-11
Y71G12B.13	-0.467549275237793	3.93853052703427e-13	3.35598605726293e-11
T19D12.2	-0.736607380374704	4.05993970144263e-13	3.4437841467531e-11
pept-1	-1.11884732305302	4.34585665705411e-13	3.66970400419533e-11
nhr-168	-0.967649944493836	4.39162648580113e-13	3.69172332299677e-11
sams-1	-0.743290180848987	4.68184468533074e-13	3.91811877103616e-11
nhr-17	0.61096648577139	4.79829558970211e-13	3.99772662775804e-11
dct-16	-0.666250736426505	4.84330742627672e-13	4.01737349614971e-11
cdo-1	1.176773511357	4.93377981402335e-13	4.07438926844413e-11
lec-8	-0.641966816551929	5.54368003523742e-13	4.55797482195441e-11
col-144	-2.13310136861089	5.63151521065104e-13	4.60997310650063e-11
F10C1.9	-0.703385227189929	5.66443633339785e-13	4.61676189155983e-11
W01B11.6	1.07474329777725	5.98750336703672e-13	4.85894970209829e-11
ckb-2	0.655190093247545	6.35744320941448e-13	5.13692372429672e-11
spp-5	-0.648476918351968	6.41917616996653e-13	5.16454405502973e-11
acl-14	0.376947734984105	7.18055848928544e-13	5.75242518974978e-11
sti-1	-0.433841583637639	8.54912277668693e-13	6.8196534285861e-11
wht-1	0.98193116839488	8.73266593999439e-13	6.9365489708108e-11
anmt-3	1.21326130290044	9.29502185825512e-13	7.35208775336922e-11
fbxa-83	0.735092717900881	9.44483440565898e-13	7.43919604069257e-11
C46G7.5	-0.682466359584469	1.08052280958926e-12	8.47509648056915e-11
rrf-2	0.794358290800652	1.09728028097134e-12	8.57067339462028e-11
F25B5.6	0.275884266565378	1.11092919879258e-12	8.64127749401063e-11
T20G5.8	0.873102983866392	1.2096257371995e-12	9.37010085518258e-11
C03H5.3	-0.379861032692235	1.26364647111833e-12	9.74827849694821e-11
cest-13	-0.655780186713346	1.27714041135677e-12	9.81199760298932e-11
abl-1	0.611403187190866	1.28337178264541e-12	9.8196275254983e-11
Y53G8AL.1	1.09552080935484	1.35453575219257e-12	1.0322002931139e-10
C49G7.7	4.42421785645294	1.37060102117874e-12	1.04021403817881e-10
C48B4.7	0.4148392192849	1.40899879440052e-12	1.06504400805775e-10
F52C12.6	-0.295996174591475	1.56647998756594e-12	1.17932666051852e-10
eif-3.I	-0.458679003377752	1.59776737162028e-12	1.19806988593575e-10
amx-1	0.405599649084952	1.6066751585845e-12	1.1999495029014e-10
Y38H6C.23	1.95590933326475	1.62525334240582e-12	1.20900790304522e-10
slcf-1	-0.757295068554247	1.65406696384417e-12	1.22557862862541e-10
lgmn-1	1.11893313002655	1.73331578929464e-12	1.27924164512273e-10
nhr-3	0.75998584905132	1.74602029371254e-12	1.28356456572295e-10
F44E5.4	2.40278113332607	1.78874459090957e-12	1.30540355000712e-10
R11A5.3	0.94092075292839	1.78965492559389e-12	1.30540355000712e-10
puf-9	0.390475488677119	1.83752424520056e-12	1.33512517443914e-10
eif-3.D	-0.537819717200113	1.93067725309524e-12	1.39739288751056e-10
myrf-2	0.479419043743412	2.08937017401555e-12	1.50643589546521e-10
ZK512.7	-0.98879926935561	2.20096175694154e-12	1.58003929374383e-10
slc-36.2	-0.817894703762063	2.20831267982974e-12	1.58003929374383e-10
arch-1	-0.446957491575177	2.30941237319654e-12	1.6460929409864e-10
tba-9	1.07823434026115	2.41385064082911e-12	1.71401682246146e-10
F56C3.9	2.14814691069056	2.65004143345773e-12	1.87462930987164e-10
pix-1	0.325921448621393	2.69716623170093e-12	1.90079241276187e-10
lipl-1	-2.68340887354594	3.23424532207616e-12	2.27075516133482e-10
igeg-1	-0.862013268362018	3.28873010740796e-12	2.30039308184588e-10
C17F4.8	1.0555610705306	3.40802685434091e-12	2.37497663239683e-10
rrp-8	-0.455046586262009	3.62233964019621e-12	2.51103500747904e-10
nol-56	-0.698036842004829	3.63005700963843e-12	2.51103500747904e-10
W02D7.11	3.42187948883942	3.66937957470201e-12	2.52890402600602e-10
F43C1.7	3.37331521752224	3.73686318791191e-12	2.56597938903285e-10
irg-3	-0.790710732505523	3.96604080900509e-12	2.71340879582516e-10
flr-4	-1.65785837618866	4.06717101893226e-12	2.77247956076015e-10
C49G7.12	2.13277164457328	4.18889964013204e-12	2.84511277731577e-10
lam-1	0.603615629903975	4.55395620619516e-12	3.08189397261135e-10
F17H10.1	0.45104867948649	4.82557765488714e-12	3.25396686037821e-10
ZK856.5	-0.99594104255986	4.88142161244345e-12	3.27982543178727e-10
F40H6.6	-0.483495431449096	5.52391430550783e-12	3.6982606275375e-10
nspe-1	-2.54531589137674	5.6326504800312e-12	3.75763935582437e-10
trhr-1	1.22568084560441	5.83938544972487e-12	3.88174183122491e-10
rpl-16	-0.566606036933343	6.12250445951888e-12	4.0555642614184e-10
C29F7.1	-0.777580366015756	6.14775987086154e-12	4.05795445560459e-10
C23H3.9	-1.10506673708924	6.18183450548513e-12	4.06612875929208e-10
oatr-1	-0.429291128347795	7.45803342233069e-12	4.872916329416e-10
asp-6	-0.664676971738473	7.47624757263835e-12	4.872916329416e-10
Y40B10A.9	0.530526637171393	7.48639657992003e-12	4.872916329416e-10
cey-2	-0.493894788977567	7.5211697358687e-12	4.87861065289255e-10
aqp-1	-0.668864189590247	7.70272748536267e-12	4.97914929105547e-10
F09F7.5	-0.802210247096065	7.77887832518387e-12	5.01109460769405e-10
F18C5.10	0.978533678436009	8.08171992146978e-12	5.18835348109152e-10
mmaa-1	0.412212828334452	8.23582504002861e-12	5.25687188460702e-10
C42D4.1	0.779716550985061	8.24453394897293e-12	5.25687188460702e-10
C53H9.2	-0.616843192437084	8.78222702435868e-12	5.5807331457162e-10
C02D5.4	0.422352512905471	8.86617673143344e-12	5.61504557457606e-10
col-135	-0.924901481123349	9.68136413295611e-12	6.09264733237756e-10
K09E9.4	-1.27798512785163	9.72765714268012e-12	6.09264733237756e-10
C49A9.9	-0.821860674508561	9.73698751254036e-12	6.09264733237756e-10
C50D2.6	-0.983627533604276	9.75031579917458e-12	6.09264733237756e-10
nsun-4	-0.42935122421741	9.99337164066749e-12	6.22377889621106e-10
nipi-3	0.670532917793638	1.01878975654319e-11	6.32391813780087e-10
F59A7.2	1.28323984970119	1.11943768568539e-11	6.91815758497221e-10
tps-2	0.865304086184811	1.12190328914518e-11	6.91815758497221e-10
K02F2.11	-1.88127835995449	1.1306464053489e-11	6.94921229989195e-10
cgt-2	-0.815082219779235	1.15204510381896e-11	7.05759395953928e-10
arcp-1	-0.834081858963055	1.17131363472552e-11	7.15226234415783e-10
str-168	-1.5082006652699	1.18813984660053e-11	7.23145115726413e-10
T19H5.7	-0.997667487115202	1.25737360372608e-11	7.62806652927155e-10
C18A11.1	1.12932193020802	1.27990648669923e-11	7.73971838698831e-10
C27A7.1	0.809609651101344	1.31579613671844e-11	7.92548115224424e-10
acs-7	0.658295680889472	1.3190814677799e-11	7.92548115224424e-10
K11H12.6	1.83551234105655	1.42020217174511e-11	8.50578591422807e-10
clec-97	-0.778443453032944	1.43792407875361e-11	8.58449833768e-10
Y54G11A.9	-0.455865760404034	1.46037209148547e-11	8.69083657999575e-10
C18E9.9	0.655943475977686	1.50262184131726e-11	8.91397121434601e-10
T01D1.4	0.45480233052533	1.60114072167923e-11	9.46844920145076e-10
emb-8	0.317846950333099	1.64169820041457e-11	9.67775926571431e-10
F34H10.3	0.579851312787692	1.84810141669145e-11	1.08603476982125e-09
egal-1	0.452546058137775	2.04183957782881e-11	1.19613514768684e-09
asp-1	-0.796472569271513	2.12284707225346e-11	1.239716237273e-09
pbo-4	0.455156908354015	2.18972280926997e-11	1.27394555178615e-09
ZK652.8	-0.597431229619523	2.19505181493079e-11	1.27394555178615e-09
Y46H3C.7	0.943757538804961	2.2090800944915e-11	1.27813010652277e-09
dnj-28	0.462560902488399	2.3154483947759e-11	1.33555063410674e-09
kgb-2	1.60896126007836	2.34850216375172e-11	1.35046078410091e-09
act-5	-0.765319656890419	2.55444979280653e-11	1.46439497908107e-09
csn-5	-0.337450239637552	2.57128294047043e-11	1.46955091469691e-09
T25B9.9	-0.284249558839309	2.77260008239827e-11	1.57979213205586e-09
rege-1	-0.842195498810987	2.86878030147411e-11	1.62964107671011e-09
mfb-1	1.28506208290221	2.88524539428288e-11	1.63404260305821e-09
haf-6	-0.462877116254734	2.93504645011976e-11	1.65724038415497e-09
sem-5	0.293905843768371	2.97542992653843e-11	1.67499727936605e-09
F22H10.2	1.12370191391618	3.09385921042658e-11	1.73645163948074e-09
rict-1	0.321925369063919	3.1177135587699e-11	1.74461666784181e-09
H25K10.1	1.27959842567271	3.23964638749011e-11	1.80745271368719e-09
E03H4.8	1.74541262392136	4.60521055100026e-11	2.56169961391842e-09
apy-1	0.345739455185653	4.72074827327777e-11	2.61819961925636e-09
VC5.2	0.584134929555166	4.9437224303561e-11	2.73377642122287e-09
elt-7	0.681360706254845	5.02250734899052e-11	2.76917419894636e-09
F53B2.8	2.68536444045538	5.43828444180834e-11	2.98962111865511e-09
T02G6.10	0.799968785820217	5.69816911505421e-11	3.12332977283059e-09
T22G5.3	0.546628854979972	5.88276651084451e-11	3.20023116237404e-09
F53A2.3	0.475005111867197	5.88790498226004e-11	3.20023116237404e-09
K10C2.8	-0.980381986905341	5.8896818042198e-11	3.20023116237404e-09
cct-5	-0.426532529788909	6.19653937341702e-11	3.35723488711201e-09
ncx-6	-1.07319675681376	6.21792325540457e-11	3.35911208489378e-09
rps-7	-0.522077628290523	6.2692148166456e-11	3.37708910784018e-09
arf-6	-0.282475281624159	6.36309551649823e-11	3.41783921353226e-09
rpl-21	-0.595158277500567	6.45885946966637e-11	3.45936513195331e-09
col-3	-2.84615913778364	6.53663573218538e-11	3.49104767622641e-09
spin-3	-1.30831840646077	6.63016550862792e-11	3.53093984729372e-09
suco-1	0.621085271377085	6.87900838471687e-11	3.65308473597457e-09
col-141	-2.32088480340834	6.9382398793411e-11	3.6741312084217e-09
ZK858.5	0.337993907070982	7.59427595699278e-11	4.01020555182497e-09
nhr-102	0.629531769681182	7.74290485031133e-11	4.07720489673978e-09
asm-2	-0.715799056247951	7.83755537454444e-11	4.11548495941765e-09
F14D7.6	-0.90589483591426	7.88285372480071e-11	4.12770882472386e-09
sra-32	1.86859207508973	8.02256789682407e-11	4.18916595526084e-09
gtf-2F2	-0.304931522269605	8.31584243622754e-11	4.33024395304226e-09
cct-1	-0.438909691899776	8.35117454274052e-11	4.3365960658785e-09
F09F3.8	1.45676422697331	8.67986629142538e-11	4.49482799721161e-09
fbxa-219	1.3606597704434	8.82291764847447e-11	4.55631995146839e-09
rla-0	-0.668917005641002	9.47406736051315e-11	4.87914469066427e-09
C10E2.5	-1.51307912631289	9.58597441115080e-11	4.92325140579268e-09
klp-20	-0.392275005268632	9.92609568866778e-11	5.08400518523951e-09
K09H9.5	-0.805130967530124	1.11794786630275e-10	5.71036803861345e-09
arl-7	1.96472556325438	1.14623074211784e-10	5.83109409439026e-09
riok-2	-0.345088888252004	1.1478041826683e-10	5.83109409439026e-09
T16G12.3	-0.700998056461648	1.17980096578039e-10	5.97744564987003e-09
Y22D7AR.7	-1.80516931859349	1.19888882632255e-10	6.05485614310532e-09
clh-3	0.280117570375419	1.20153978728005e-10	6.05485614310532e-09
K09F6.6	-0.840715596868791	1.21101223121275e-10	6.08622929927996e-09
ifp-1	-1.68725864271951	1.22111121727655e-10	6.12057510135461e-09
Y56A3A.6	-0.593199886214839	1.2303991964284e-10	6.15068355633246e-09
F43B10.1	-0.727569158424936	1.27379701382555e-10	6.33565240810567e-09
frpr-11	1.20815100254945	1.27416033172721e-10	6.33565240810567e-09
bath-1	0.469620601295225	1.34213147878058e-10	6.65597796328592e-09
snu-13	-0.568221346574034	1.38784901777833e-10	6.85095277092341e-09
C08B11.9	-0.275321804091681	1.39184320526203e-10	6.85095277092341e-09
rps-0	-0.733198545176121	1.39415950168567e-10	6.85095277092341e-09
F11D5.5	-2.04655709171802	1.39606527178744e-10	6.85095277092341e-09
clec-170	-1.22984968560927	1.40059296344861e-10	6.85522602945367e-09
icd-1	-0.395633061626697	1.51453784374239e-10	7.39362667156114e-09
pah-1	-0.700324268535302	1.59741941871698e-10	7.77798036968012e-09
T09B4.4	-0.747565893684296	1.61723897833154e-10	7.85408339062255e-09
oac-20	1.00747451094861	1.65389742707604e-10	8.01135947492697e-09
unk-1	0.769218616883836	1.67756594295779e-10	8.09076440684509e-09
lrp-1	0.631948991054827	1.67892209231982e-10	8.09076440684509e-09
vha-13	-0.277126222958119	1.70422651211125e-10	8.19164876821474e-09
Y34F4.4	1.32748716187054	1.81889965618492e-10	8.72048413167329e-09
ddx-10	-0.434421594205684	1.83751482943828e-10	8.78725841649236e-09
ugt-14	1.98094134766927	1.89870519750417e-10	9.05677547898553e-09
F48E8.3	-0.22936654334346	1.94501841811599e-10	9.25414093045744e-09
aat-6	-0.886200155125369	1.96519589050414e-10	9.32647143376979e-09
gsp-2	-0.264256720061437	2.12845269156462e-10	1.00757510495127e-08
ins-7	1.05664324390783	2.18199307194144e-10	1.03031844147643e-08
ifb-2	-0.728798635913779	2.22239757560227e-10	1.04676042593568e-08
F10A3.17	0.774646440018219	2.30750898841237e-10	1.08412439841549e-08
hsp-16.41	2.90448932415708	2.31441915315844e-10	1.0846525361277e-08
dgk-2	0.46452209491842	2.339983845222e-10	1.0938986823574e-08
prx-5	0.428485506353944	2.4494940567728e-10	1.14224416886226e-08
inx-2	0.61766139444357	2.56478301712665e-10	1.19303777764408e-08
npr-30	-1.06470950338133	2.61987369444932e-10	1.21564733356799e-08
K08D8.3	0.737978797509301	2.70297421096021e-10	1.25110998910272e-08
C18B2.5	-0.602754466501032	2.7353488635323e-10	1.26297659595508e-08
C06B3.7	3.31368512240212	2.75412874119501e-10	1.26852327720987e-08
lsy-13	-0.268566741802101	2.8553814623762e-10	1.31193580621824e-08
ZC443.3	1.1019462840759	2.8822775779291e-10	1.32105563510657e-08
frm-10	0.514069718465855	3.00131860698659e-10	1.37226142942855e-08
nhr-274	0.231437108121027	3.23116173196695e-10	1.47375566490152e-08
R09B5.11	0.726706919358588	3.28639783554191e-10	1.49531101517157e-08
feh-1	-1.1348868540032	3.38605361505747e-10	1.53692399680066e-08
Y49A10A.2	0.603175861681589	3.43553041210392e-10	1.55561480930677e-08
sem-2	-0.468008889428879	3.57806218135065e-10	1.61624948558071e-08
Y39B6A.41	-0.883085387299805	3.73868645770101e-10	1.68474558500152e-08
F26F12.3	0.609583969156698	3.78087806165328e-10	1.69967242550965e-08
ZK896.4	-0.844388403031249	3.80618843984191e-10	1.70695714098748e-08
tbc-11	0.412392755802614	3.8335985990917e-10	1.71514652359363e-08
hpk-1	0.478170026014084	3.97426930488676e-10	1.77384886641446e-08
nmrk-1	0.223855291532632	4.14918487849566e-10	1.84752065872398e-08
clec-169	-1.11094072607137	4.33741471625175e-10	1.92675773153685e-08
B0416.4	0.592546405932277	4.5781936177674e-10	2.02890821651696e-08
F14D2.14	-0.640310772477159	4.61334305423271e-10	2.03966341732657e-08
psr-1	0.308960465510674	4.76731419550623e-10	2.10277816256376e-08
rps-22	-0.646820078535912	4.79652030863426e-10	2.11069412454596e-08
C42D4.18	0.971839811052162	4.83571284213472e-10	2.12295721167816e-08
adsl-1	-0.346048104067649	4.98636069748462e-10	2.18397938399642e-08
lrp-2	0.555456171078736	5.22398879079371e-10	2.28272479888622e-08
rpl-19	-0.616141809567391	5.3515673613089e-10	2.32827285626632e-08
F15E6.6	-0.811072134044096	5.35306519284532e-10	2.32827285626632e-08
mfsd-11	-0.64246339048809	5.44937255124305e-10	2.36467448716672e-08
T07D10.8	-0.506828031588228	5.48794933609819e-10	2.37591450934172e-08
F43G6.3	-0.49374610434327	5.53140794639329e-10	2.3892113678131e-08
rpl-13	-0.66826961378755	5.58717620156744e-10	2.40775184079502e-08
nhr-173	0.684885740971236	5.65801613444008e-10	2.43045492841644e-08
sqv-2	-0.357319640118729	5.66578898814673e-10	2.43045492841644e-08
cest-8	1.14964982318504	5.71897624931696e-10	2.44766960661406e-08
lam-2	0.646004560010559	5.82081362082516e-10	2.48558023088812e-08
sax-3	0.356809909474731	6.30776417901733e-10	2.68739425681498e-08
thn-1	-1.60827119441484	6.38743436273388e-10	2.71516654339704e-08
faah-2	1.41479889087025	6.40229587173874e-10	2.71532666089625e-08
pcp-1	-0.447828222589076	6.44730640690484e-10	2.72824392559454e-08
nlp-24	-0.740436203026449	6.72809273854487e-10	2.84064924497212e-08
tag-96	0.317502964534154	6.78086516285488e-10	2.85649659197478e-08
gpi-1	-0.227080403643431	6.80513303199685e-10	2.86029201385231e-08
dmd-9	0.454017296185052	7.41651263132232e-10	3.10429202938939e-08
F35E12.4	2.54508080930594	7.41877109338765e-10	3.10429202938939e-08
nsy-1	0.509152215723083	7.48672620343882e-10	3.12574987549363e-08
drd-50	1.21560681445561	7.57954638194934e-10	3.15747058835605e-08
C08H9.15	-0.927488804820309	7.60700704570492e-10	3.16188368245642e-08
B0035.13	-0.437912299908724	7.65191929613282e-10	3.17351502489615e-08
sqst-1	0.770828166557833	7.7492941779299e-10	3.2068050476705e-08
F33G12.6	0.468180591082077	7.98338945629341e-10	3.29640129400168e-08
dpf-2	-0.715003917324974	8.34711599530552e-10	3.43901179006587e-08
C27B7.7	1.05892122157514	8.46351493112399e-10	3.47932129164145e-08
rhr-1	-0.490502815385421	8.53708315203932e-10	3.50188535597657e-08
EGAP4.1	-1.73404969083903	8.63517206817147e-10	3.53438723995507e-08
rei-2	0.405519963785703	8.94588493570029e-10	3.65358516349973e-08
lact-4	0.899385439141362	8.97395307474676e-10	3.65708096389571e-08
cnnm-3	-0.585443850531582	9.07448259730046e-10	3.69002713164847e-08
M79.2	0.542068424598096	9.29622147186979e-10	3.77201228813141e-08
C49A9.6	-0.932829374688306	9.33250719594157e-10	3.77855680119051e-08
gly-14	0.646402597505202	9.43816974246657e-10	3.81310193948876e-08
cah-4	-0.496415565583484	9.51781086046127e-10	3.83700822344531e-08
C01G12.3	0.739705581501668	1.00809072779051e-09	4.05529373029205e-08
F37F2.2	-0.32631917294196	1.01593085686505e-09	4.07599382984743e-08
C35B1.4	-0.796297165415821	1.0175851447608e-09	4.07599382984743e-08
ZK470.2	-0.577867472273096	1.03726247915586e-09	4.14595361071553e-08
ptr-24	-0.518716174306103	1.04515186128058e-09	4.16859931735443e-08
scav-6	-0.708641090314859	1.05645734168416e-09	4.20474508008731e-08
ttr-45	0.444081491356327	1.06630957409451e-09	4.2320076350097e-08
fbxa-33	2.61092047479704	1.06782226147423e-09	4.2320076350097e-08
Y32F6A.4	-0.879779328881225	1.08659536089947e-09	4.29732418468807e-08
siah-1	1.13327677303142	1.14029352765216e-09	4.50019841460366e-08
col-147	-2.62431934659914	1.14893752942303e-09	4.52315080626611e-08
C16B8.3	-0.520941191807589	1.15093509793499e-09	4.52315080626611e-08
C45B11.2	2.89951049943814	1.20027281405921e-09	4.7071786971452e-08
C09E9.1	0.268969522620096	1.21076433720323e-09	4.73841091131768e-08
ver-4	-1.47836549133946	1.2289815062708e-09	4.79968485761508e-08
nifk-1	-0.396187717754629	1.24026618594007e-09	4.83368605439345e-08
F28F5.6	1.03559135186712	1.32761022456261e-09	5.16335710988605e-08
pigb-1	-0.432265010897608	1.37217284994895e-09	5.32562158284533e-08
Y17D7B.7	1.26526292239774	1.38208984117486e-09	5.35302813278179e-08
ZK688.7	0.484615370909935	1.39699380709612e-09	5.39959709439669e-08
fbxa-57	-1.49917519422753	1.44311718492504e-09	5.56639398119441e-08
C25F9.10	-0.788792989761556	1.45532328842338e-09	5.6019487402022e-08
fbxa-61	-0.842607103960404	1.45863224702812e-09	5.60318034893219e-08
gst-4	0.955300777523706	1.46243337838114e-09	5.60629368325824e-08
apm-3	0.33631460267806	1.47586336285643e-09	5.64623155104218e-08
ugt-15	-2.08662114493277	1.48512326497741e-09	5.67008568742698e-08
Y82E9BR.2	-0.46507801558529	1.52346295221257e-09	5.8046415654831e-08
F34H10.5	-1.4765404909602	1.5297256678895e-09	5.81668100816563e-08
C01C10.2	-0.620384877674861	1.5366299340447e-09	5.8311062234012e-08
ztf-9	0.469329876472917	1.56017856620329e-09	5.90247909120033e-08
F56F10.1	-0.535977642542458	1.56173563919522e-09	5.90247909120033e-08
memb-1	0.377116765924267	1.58119340618769e-09	5.96399428418398e-08
Y39A3A.4	1.89002775286771	1.59683893884997e-09	6.01091219832963e-08
C53D5.1	0.378806769460035	1.66675822935774e-09	6.26153301954713e-08
C08B6.4	-2.47724373002416	1.68117147788272e-09	6.30304810487789e-08
R01H10.4	0.788513187331458	1.68608392874684e-09	6.308848169319e-08
icmt-1	3.07482725465312	1.76217294701832e-09	6.58041714438356e-08
C34C12.4	0.38059118331746	1.82855240531944e-09	6.81472035588832e-08
ubl-1	-0.652284137687664	1.84800794525863e-09	6.87356288528141e-08
F25B5.3	0.220689840331801	1.88825329209324e-09	7.0093457848673e-08
F18G5.6	0.635986950912238	1.91598744446337e-09	7.09824123199809e-08
wdr-23	0.264142279150832	1.95055049961521e-09	7.21203543703882e-08
hsp-16.2	2.66307039001236	1.99615513411157e-09	7.36612680001091e-08
D1044.1	0.949738541538957	2.06956956173852e-09	7.61757389381427e-08
pqm-1	0.78898772726183	2.07246037795087e-09	7.61757389381427e-08
dos-1	1.21400162205532	2.07648578882913e-09	7.61757389381427e-08
kin-35	0.627685516632156	2.11420891778356e-09	7.74081257280675e-08
dod-24	-1.00227617769808	2.16114482837529e-09	7.89723605316243e-08
Y34F4.1	-0.656355164639921	2.16708904246173e-09	7.90355081517267e-08
haf-4	-0.647005896598967	2.17229563552334e-09	7.90715611330495e-08
ugt-58	0.357791037253067	2.26597152650007e-09	8.23215159607951e-08
egas-3	1.06314100799887	2.30905577852992e-09	8.37244867008159e-08
F53A9.1	1.10741019965232	2.32548179012577e-09	8.41267648442449e-08
atln-1	-0.215345920634693	2.32912573104466e-09	8.41267648442449e-08
T01G1.4	-0.281405164549549	2.43426179994733e-09	8.77551378881012e-08
K07E3.4	-0.370479295093953	2.44559485157288e-09	8.79944742564014e-08
sdz-24	-1.84204243801468	2.46131966249199e-09	8.83906099484191e-08
lys-1	-0.506297586349254	2.59253139223123e-09	9.29246529230719e-08
C09G9.5	-1.18556134428812	2.59920612904772e-09	9.29861032349781e-08
lec-9	-0.517150704018142	2.65180385369902e-09	9.46870762694131e-08
R10E8.8	0.925158068180198	2.68698429420309e-09	9.57608509108957e-08
cka-1	0.300272297538272	2.70385232730839e-09	9.61791569786015e-08
tes-1	0.703018455222872	2.71958985203321e-09	9.64020406705156e-08
F55G1.15	-0.804956225511227	2.72040326014631e-09	9.64020406705156e-08
tps-1	0.387834204620915	2.74284281334009e-09	9.70138327903269e-08
F17C11.13	0.859188672986038	2.75706270854138e-09	9.73331403659447e-08
F53E4.1	0.251620304920158	2.76517239905901e-09	9.7435943219474e-08
cest-1.2	0.833547020251758	2.96548427195771e-09	1.04298251711293e-07
fat-2	0.543774858926698	3.05490353564122e-09	1.07241988163165e-07
col-176	-2.01672093325388	3.11766471521998e-09	1.09240640657035e-07
ugt-54	0.801308583205639	3.12508819047025e-09	1.09296461228648e-07
tmem-135	0.593889305230776	3.1642493204512e-09	1.10459995830872e-07
nhr-212	0.747763189422461	3.25688342811966e-09	1.13482410303961e-07
col-96	-0.828903088556546	3.31937690176683e-09	1.15445342115994e-07
eef-1G	-0.452135324975652	3.33882873443684e-09	1.15822827260561e-07
F55G1.7	0.477412201560916	3.34258772794e-09	1.15822827260561e-07
ZK6.8	-0.828035727562023	3.36366902544896e-09	1.16338264854366e-07
paf-2	0.539899580542791	3.45449308288998e-09	1.19259534681134e-07
C05G5.1	-0.755232147399475	3.53134115114661e-09	1.21688458123887e-07
F02C12.1	0.600318888629347	3.63910479181028e-09	1.25171850325276e-07
ttc-36	0.725527152566916	3.79790146845457e-09	1.30394617083607e-07
K06A9.1	-1.01003682746973	3.86003427224488e-09	1.32285562097811e-07
K08D12.3	-0.487990938191661	3.91194057683006e-09	1.33819777469446e-07
T19C3.4	0.453175173764672	3.919385160624e-09	1.33830226267864e-07
sma-9	0.552368011851683	3.94208969046567e-09	1.34360751522672e-07
rnh-1.0	-0.285536804814167	3.95165421187855e-09	1.34442304638612e-07
nhr-19	-0.844200225263719	4.10016243070838e-09	1.39242110373296e-07
F42A10.5	-0.359564937685967	4.11599409063334e-09	1.39526989553368e-07
Y22D7AL.11	-0.816111674058578	4.14159887343878e-09	1.39984848731606e-07
C05C8.7	-0.731413513931255	4.14443566873152e-09	1.39984848731606e-07
col-117	-2.8431041078653	4.23964548289242e-09	1.42793104316287e-07
W02H5.8	0.561758212771843	4.24281228551006e-09	1.42793104316287e-07
mec-17	-0.604327060394877	4.26633165688431e-09	1.43285335253647e-07
rbm-7	-0.24071999138293	4.27272497635701e-09	1.43285335253647e-07
C32E12.4	0.983527816439514	4.29681321274221e-09	1.43835822296545e-07
F29B9.1	-0.292594578141802	4.31920638945376e-09	1.44253282281404e-07
oga-1	0.294650054531074	4.32467431143439e-09	1.44253282281404e-07
C11H1.3	0.316583416741657	4.39360490440547e-09	1.46292215875639e-07
atf-6	0.445391162842877	4.51430720813902e-09	1.5004468603506e-07
srh-237	0.798869346523349	4.88427899501483e-09	1.62054325735483e-07
T12B3.3	0.419274681987349	5.02020290405304e-09	1.6605790747971e-07
rpl-3	-0.532799944551111	5.02266262354613e-09	1.6605790747971e-07
math-10	-2.43453380583582	5.03676349266735e-09	1.66230930340743e-07
srp-8	1.13668569558143	5.09077095124996e-09	1.67718088316576e-07
camt-1	0.467627256587967	5.12887389457375e-09	1.68676964960841e-07
Y66H1A.5	-0.61055432086905	5.21907537407039e-09	1.71342884347327e-07
Y44A6D.2	-0.893493031450997	5.38056733353338e-09	1.76335865794435e-07
Y53G8AM.5	-2.04680819565393	5.53935571973501e-09	1.81222970893809e-07
C05G5.2	0.400212013673965	5.72522555530395e-09	1.86977488257366e-07
Y41E3.8	0.430364677062067	5.77547410052783e-09	1.88290499979991e-07
rec-1	-0.404748161859195	5.81611831032454e-09	1.89286378203722e-07
R05A10.1	-2.55158357561475	5.85441032682774e-09	1.90202384725672e-07
strl-1	0.317717749515503	5.9314609824739e-09	1.92372262244733e-07
best-21	0.772578564955606	5.98912630738933e-09	1.93907015126633e-07
swan-2	0.322928189510243	6.17001027860677e-09	1.99418987384073e-07
T06E6.10	0.975846316604634	6.32574846388281e-09	2.04100655256363e-07
Y45G12B.3	-0.371513286583385	6.43566092211341e-09	2.07290205577213e-07
tent-5	0.44023434457335	6.51404320080628e-09	2.09454980861603e-07
F17C11.11	1.01569945617858	6.60362093267087e-09	2.11971708910699e-07
T01D3.1	-0.442115857764477	6.71658266703627e-09	2.15229160130362e-07
ncr-1	0.891107540398711	6.76813649469013e-09	2.165110695042e-07
lin-12	0.548153997637038	6.78818806180906e-09	2.16782578205575e-07
C50H2.13	-0.873687331578556	7.06009904715458e-09	2.25082681527142e-07
rcan-1	0.583697154237631	7.12630602749704e-09	2.26807695741018e-07
ceh-74	0.612140990849049	7.33243569547715e-09	2.32972609402398e-07
prg-2	-0.592924620632125	7.50342037786569e-09	2.3794215986471e-07
K12C11.6	0.707415720957475	7.51423016322994e-09	2.3794215986471e-07
C10A4.1	1.01744714516295	7.6733277350811e-09	2.42570323308314e-07
Y73C8B.1	0.769214756916233	7.71232795835157e-09	2.43392760786631e-07
cct-2	-0.383847495730948	7.86407050726955e-09	2.47764480217269e-07
cpt-5	-0.707561283960488	8.07743629084398e-09	2.54059766288861e-07
C24B9.3	-0.748244315234759	8.14236588147242e-09	2.55673016438998e-07
ssp-11	3.34915407057052	8.34789750230161e-09	2.6168843909389e-07
eps-8	-0.546780590658027	8.36525572212898e-09	2.61794797607729e-07
C08E8.4	2.00030104052137	8.40596985723192e-09	2.62363229554088e-07
abhd-3.2	-0.844354240896815	8.41141048554395e-09	2.62363229554088e-07
cyp-43A1	0.624010851492398	8.442960980111e-09	2.62909877962061e-07
F30A10.14	-0.714234711626234	8.48595762626673e-09	2.63810550019894e-07
pat-12	-0.485687365976855	8.51239665434658e-09	2.64194350467518e-07
rpl-4	-0.618764020957615	8.72337469670664e-09	2.70294846387541e-07
dhs-17	0.269000611755279	8.77299852439916e-09	2.71383878446183e-07
eif-1.A	-0.319140140630251	8.81733043748781e-09	2.72305891896452e-07
msra-1	1.19482591114288	8.95301169488416e-09	2.76041377026807e-07
F47B10.5	-0.531793010586282	9.09071901149657e-09	2.79487936559246e-07
nep-17	-0.597769561164163	9.09461438713007e-09	2.79487936559246e-07
meg-2	0.306894573177463	9.17014109748909e-09	2.81347733246367e-07
rpac-40	-0.410345440990485	9.27708017365282e-09	2.84163635515189e-07
Y6E2A.4	2.25376363292256	9.35553568860933e-09	2.86099301824911e-07
nhr-154	0.619492359455753	9.78407937530049e-09	2.98717185617888e-07
egrh-1	0.3278636878699	1.02871177702396e-08	3.13564731253513e-07
cest-12	0.663136213464821	1.03459667210015e-08	3.1484657816866e-07
Y49F6A.5	0.672962465285514	1.05037983843602e-08	3.19131611852864e-07
mbk-1	0.495234453823517	1.05847921614474e-08	3.21072028897237e-07
nspe-7	-1.95994804725528	1.07302249275043e-08	3.24957667998376e-07
Y34F4.7	2.24903358167216	1.09109917964984e-08	3.29899116479288e-07
ZK616.1	-1.03656414444989	1.11734920477048e-08	3.3729191936598e-07
R09A8.1	0.521049372727978	1.14256643256757e-08	3.44349684001795e-07
taap-1	0.311396001674226	1.16120186251753e-08	3.4940433571033e-07
nhr-1	-0.385968503282678	1.18336832802938e-08	3.55503568545492e-07
T11G6.3	0.637400924747677	1.19706892790177e-08	3.58509362732831e-07
sma-10	0.665382538646213	1.19719866142512e-08	3.58509362732831e-07
ech-4	-0.231030180804826	1.20446955583887e-08	3.60111424142831e-07
cyp-35D1	-0.958409661450981	1.20938336415261e-08	3.61004785738929e-07
T23F4.2	0.793867724757168	1.21494983466429e-08	3.62089818769743e-07
add-2	0.346290660158226	1.28382122935736e-08	3.82008139135445e-07
ndg-4	-0.489845943047315	1.28962905725915e-08	3.83128150671632e-07
T24E12.1	0.426810066737775	1.33957806842765e-08	3.97337507448491e-07
col-107	-2.72091286037905	1.34488243832035e-08	3.97794065376516e-07
Y51H4A.7	-0.453371546502506	1.34536134347973e-08	3.97794065376516e-07
Y39B6A.27	0.786838812154019	1.3509545501247e-08	3.98229540982334e-07
Y57G11C.33	0.266212611468324	1.35108283401667e-08	3.98229540982334e-07
wrk-1	-0.373657444163303	1.36289522025095e-08	4.01080593388135e-07
M05D6.1	3.18720199280267	1.37095553140492e-08	4.02820256923458e-07
btb-9	-0.93583112911042	1.39116587736661e-08	4.08118865995532e-07
ifc-1	-1.08656549467326	1.41146199489743e-08	4.13426039942925e-07
mpk-1	-0.300424350268762	1.43115498058982e-08	4.18540269362507e-07
B0244.10	-0.855919802881638	1.44237571955208e-08	4.20520083074944e-07
ZK1320.11	-0.435479389363452	1.44241125262557e-08	4.20520083074944e-07
C25D7.5	1.47613772637398	1.45086322751718e-08	4.22327361227284e-07
enu-3.3	-0.474832394150902	1.47008974627804e-08	4.27260502073305e-07
unc-115	-0.3559643197763	1.47346058139577e-08	4.27577276452709e-07
F25D1.5	-1.09147938190133	1.49250554910961e-08	4.32434451678652e-07
din-1	0.464203655667434	1.4971577240947e-08	4.33112942837644e-07
ceh-79	0.72603042485468	1.5500332982724e-08	4.47718400761392e-07
rsp-1	-0.370648597692598	1.58143806367827e-08	4.56086737564813e-07
rpl-6	-0.403940661299908	1.68185163106497e-08	4.83816658415892e-07
ZK673.1	-0.663618465651395	1.68275078036467e-08	4.83816658415892e-07
rab-3	-0.741560021751088	1.68990954442515e-08	4.85130847163764e-07
rps-11	-0.522392755503076	1.71720167905632e-08	4.92211967516665e-07
ifc-2	-0.544288171998169	1.74633724699687e-08	4.9979905392677e-07
B0395.3	0.273461283105735	1.75386317670821e-08	5.01187791319697e-07
mtx-1	-0.318249105528108	1.76228348487918e-08	5.02827491743457e-07
gob-1	0.362109336812557	1.80690085712621e-08	5.14668203271767e-07
Y56A3A.31	-0.270822548261563	1.80927315670593e-08	5.14668203271767e-07
Y9D1A.1	0.838682332567962	1.81835140829552e-08	5.16466901513756e-07
F09F7.6	1.06230127417198	1.82387771919004e-08	5.17252824870447e-07
tag-241	0.745644048562033	1.85154710949428e-08	5.24306678467973e-07
DC2.5	0.58144259977151	1.87174727593431e-08	5.29227367038681e-07
rps-6	-0.46238187464526	1.90174615063143e-08	5.3689959849001e-07
F13H8.9	0.454445710087826	1.91360817005093e-08	5.3943607151541e-07
sdpn-1	-0.337557738885912	1.91711790756603e-08	5.39613998426919e-07
Y82E9BR.5	-2.02318477758151	1.99550439260618e-08	5.60790283004808e-07
Y67D8C.9	0.613094632422202	1.99833515975254e-08	5.60790283004808e-07
cpr-5	-0.77441535804649	2.01113478925621e-08	5.63538606269013e-07
Y71F9B.6	-0.362043072129979	2.06435828307883e-08	5.77588960814863e-07
madf-6	0.276606434225139	2.11287466846144e-08	5.90282392473595e-07
M03C11.6	-0.406580687917736	2.12101074441537e-08	5.91673622244203e-07
Y57A10A.14	0.749981497456676	2.12889578566117e-08	5.92990793432457e-07
Y38C1AA.12	-0.302491998018349	2.15228983848369e-08	5.98617586234648e-07
cln-3.3	-0.848788064754813	2.17492588958789e-08	6.04017195943919e-07
mir-238	1.9584869014423	2.21396136134218e-08	6.13948515972198e-07
ZK430.5	0.695398582965439	2.24087475496264e-08	6.20493916640024e-07
rps-4	-0.57128205190315	2.24643317016732e-08	6.21115578288445e-07
acl-7	-0.351023290882242	2.27139232996968e-08	6.27091614397815e-07
F48E3.8	0.727757117379451	2.28675832520837e-08	6.30405464181707e-07
glrx-3	-0.311140401001774	2.30673481196695e-08	6.34978719311783e-07
akir-1	-0.22516576628007	2.33254626970628e-08	6.41142410145367e-07
fkh-7	0.780989950386967	2.4251521610898e-08	6.65620825941281e-07
K01A11.1	-0.519482785906529	2.43690624204893e-08	6.67869070372064e-07
nsun-2	-0.397072330874042	2.45830611615933e-08	6.72750459175515e-07
C52D10.3	-1.37618982341635	2.51352098882858e-08	6.86858082457443e-07
T19D12.1	-0.942142697770156	2.52055869020215e-08	6.87778649294462e-07
kpc-1	0.789848355676275	2.5345113346362e-08	6.90580661033288e-07
F35F10.5	-0.895104077734052	2.56544269787322e-08	6.97994032138338e-07
T23F11.6	1.42752757473769	2.60391195990894e-08	7.07433820296419e-07
cnp-3	0.829052527914356	2.62567733450941e-08	7.11444321370523e-07
F14B8.5	-0.700984429882617	2.62626411174865e-08	7.11444321370523e-07
pab-1	-0.562287608065218	2.63676851845403e-08	7.13259201254536e-07
fbxa-175	-1.03368396088743	2.64270231180299e-08	7.1383425845906e-07
aha-1	0.310372934718747	2.68936670179906e-08	7.24803249194011e-07
best-26	1.19520599724616	2.69104375034158e-08	7.24803249194011e-07
F49E8.6	-0.521931480993371	2.71690612981807e-08	7.30719114914914e-07
T07D3.4	-0.663324137177536	2.83160900732869e-08	7.6003765380361e-07
M60.7	1.92394061310389	2.83402496537247e-08	7.6003765380361e-07
F01D5.5	-1.02053895646038	2.85298674759872e-08	7.64029851006938e-07
rpl-5	-0.578510245719895	2.88768449857774e-08	7.72218739091845e-07
pek-1	0.518490937900111	2.93998565496525e-08	7.85085058233313e-07
Y48G9A.7	0.912426242158563	2.94937538187693e-08	7.86472132413441e-07
hmg-1.1	-0.348768950743571	2.97679327102554e-08	7.92655776401205e-07
F08F3.4	-0.968236124542966	2.98765421638669e-08	7.9441937504092e-07
dkf-1	0.290158394495124	3.03610877898151e-08	8.0615998825478e-07
M60.4	-0.496314896675076	3.05087477764564e-08	8.08934916290598e-07
Y71F9AL.9	-0.297506289094406	3.08432113830369e-08	8.15589171738344e-07
ser-5	-0.669739027463641	3.0846725848847e-08	8.15589171738344e-07
C35B1.5	0.346966892684521	3.13071994605441e-08	8.2659825505262e-07
nhr-133	0.521908701847604	3.15350885766378e-08	8.31444121600073e-07
ZK829.9	-0.334180843521937	3.19448115922585e-08	8.40479854894826e-07
C44H4.4	0.450759437504261	3.1967467008429e-08	8.40479854894826e-07
ugt-27	1.97453609809949	3.33999256171577e-08	8.76911772575963e-07
Y53G8B.2	0.37531516194725	3.34504949713271e-08	8.7701115906643e-07
chst-1	0.844563268062581	3.36733628622149e-08	8.81008079615345e-07
cest-26	0.717977980728139	3.36969376445216e-08	8.81008079615345e-07
acr-8	-1.07916282483984	3.42211679370174e-08	8.93467986277616e-07
ncx-7	-0.937587204967929	3.48688345247852e-08	9.09111504870129e-07
nhr-243	0.475572629860387	3.54494767716149e-08	9.22389860032088e-07
let-767	-0.332811820042232	3.54765330781572e-08	9.22389860032088e-07
asah-1	-0.997453955451709	3.56064759240587e-08	9.24486146360671e-07
sax-1	0.312025498418174	3.61414676572195e-08	9.37078772755513e-07
H01M10.1	0.405716236722543	3.68771728393647e-08	9.54833538738577e-07
H34I24.2	-0.592647703912563	3.71515335327328e-08	9.60610548420151e-07
piki-1	0.301884173588174	3.77458779004128e-08	9.7463392165446e-07
epg-7	0.36317619207386	3.84956787817228e-08	9.9262722756833e-07
Y55F3BR.10	0.443490474591561	3.87647295886007e-08	9.98191786906468e-07
F11D5.7	-1.01634790702617	3.94420071344334e-08	1.01423849896034e-06
Y39H10B.2	0.550428471838735	4.04802265121819e-08	1.0395100358868e-06
EEED8.15	0.625611641234728	4.11872773220177e-08	1.05519350688867e-06
lec-3	-0.705096026648879	4.12035445984481e-08	1.05519350688867e-06
rpl-7A	-0.596913506106219	4.19978548845809e-08	1.07406792314646e-06
C16C8.12	0.384828888827624	4.33805698769619e-08	1.10791847808383e-06
M01H9.2	-1.5447365563208	4.53952070726202e-08	1.15779394800454e-06
rps-3	-0.473827039852513	4.55080351785846e-08	1.15909460252411e-06
Y51H7C.15	1.51921585592558	4.57017288757054e-08	1.16244858820078e-06
clip-1	0.557517343979296	4.58322809120298e-08	1.16418961785489e-06
C06A5.2	-0.995533163482354	4.63148788074383e-08	1.17485618149423e-06
prmt-1	-0.503682646236121	4.68216803829567e-08	1.1861070546742e-06
col-155	-0.786548002167486	4.73735024380803e-08	1.19846650027565e-06
fbxa-182	1.17397979361679	4.76102776794741e-08	1.20283324175124e-06
oac-14	1.98043633787668	4.78740642548142e-08	1.20786972883008e-06
atfs-1	0.304452624596795	4.81067149276902e-08	1.21210816940118e-06
snb-2	0.466239010077154	4.93357067123706e-08	1.24140558124846e-06
irg-4	-0.794513363957797	5.01178829969457e-08	1.25939656120743e-06
kmo-1	-0.73580128103941	5.05303128898625e-08	1.26806056952257e-06
mig-17	0.954235561949979	5.13225053831951e-08	1.28621883143499e-06
nhr-131	0.535643609067206	5.18009124352374e-08	1.29647517291183e-06
F54D11.4	-0.408946398290611	5.19725512046776e-08	1.29744436373968e-06
clec-84	-0.512400520858754	5.19780602351702e-08	1.29744436373968e-06
dct-11	0.364509272038549	5.27294892994569e-08	1.31445080639311e-06
amt-1	2.31117637249559	5.33095152933463e-08	1.32714498497885e-06
T07G12.8	-0.650629358269153	5.37237819538982e-08	1.33568437202623e-06
madd-4	-0.867016193374405	5.43481380220344e-08	1.34941747729941e-06
C44F1.1	-0.725581440657688	5.46255468868334e-08	1.35451124595315e-06
F40G9.6	1.04538521987447	5.51001985622069e-08	1.36447598711642e-06
moe-3	1.03394542199951	5.56089723261688e-08	1.37525830504797e-06
B0361.9	-0.5167012819462	5.58833065058361e-08	1.38022195488591e-06
clec-56	-0.636563317070642	5.59673483696695e-08	1.38047883228661e-06
mrp-2	-0.353535307677188	5.60634570289022e-08	1.38103228050434e-06
M03A1.3	0.792605917814548	5.62620681598044e-08	1.38410594451928e-06
F14D2.8	-0.504794289142747	5.65761725971283e-08	1.39000908454229e-06
meg-1	0.256849057561844	5.73644205741444e-08	1.40753066502999e-06
fat-3	-0.357021836298756	5.82038792585316e-08	1.42626133409207e-06
Y7A5A.1	-0.427900098034521	5.86520248995831e-08	1.43536665635455e-06
C10E2.1	-1.51408439934943	5.94513278094007e-08	1.45303075764671e-06
rbm-3.2	-0.495521025577521	6.01722152965409e-08	1.46873482805854e-06
rpl-17	-0.494688937516232	6.28988270779023e-08	1.53329182367016e-06
tir-1	0.478969056493627	6.31816571046896e-08	1.53673419099464e-06
T02G5.4	-0.421000662288365	6.32039934523027e-08	1.53673419099464e-06
D1053.3	0.854259063024667	6.39642956499893e-08	1.55320555214339e-06
mat-3	-0.299540037909905	6.46261624311919e-08	1.56724714221879e-06
amx-3	-0.575956352487379	6.57253618362312e-08	1.59184448705683e-06
ptr-22	2.02474097541156	6.71968761812227e-08	1.62538405276542e-06
F47B10.9	0.389881856433704	6.75491115924954e-08	1.63179851277438e-06
linc-96	-1.54074969827309	6.80550464434111e-08	1.64190463401311e-06
mltn-10	1.27242220447403	6.82988603025942e-08	1.64566893988744e-06
rpl-24.1	-0.395192926058893	6.9339146688342e-08	1.6685900434142e-06
T24D3.2	0.839572661796045	7.22014404528446e-08	1.73524128555003e-06
crh-1	0.278888254194525	7.25694361040173e-08	1.74185230372075e-06
tbc-16	-0.938357287024463	7.42948443111346e-08	1.78098612718226e-06
nhr-126	0.779274850419442	7.62562806278708e-08	1.82567080031937e-06
rnst-2	0.520291910465806	7.6657178805781e-08	1.83203889247203e-06
acs-22	0.406768973007683	7.67177280801527e-08	1.83203889247203e-06
dpy-27	0.454875245179329	7.73078804927004e-08	1.8437831141427e-06
Y58A7A.4	2.57566506509203	7.80406244214942e-08	1.85889395858365e-06
F17H10.2	-0.471109638735411	7.8961937522457e-08	1.87845238679693e-06
T10B5.4	-0.689037647871058	7.9451553648412e-08	1.88770446729167e-06
F43G6.4	0.520860435482404	7.96420201263779e-08	1.88983456872036e-06
DH11.2	0.584481175668229	8.13641306297564e-08	1.9282578922698e-06
D1086.3	-0.818826637001504	8.23781138112401e-08	1.94982338573928e-06
F59B1.8	0.405180854861538	8.37549833933799e-08	1.9798637713365e-06
acs-17	0.840676101496454	8.38585209880071e-08	1.9798637713365e-06
T01G9.2	0.345414359856644	8.48463386761992e-08	2.00066599348935e-06
tni-1	-1.03020591746689	8.57501556271753e-08	2.01943771028521e-06
fbxl-1	0.495053687209566	8.59171254514811e-08	2.02083115898804e-06
sqd-1	-0.326010365656689	8.72012318484521e-08	2.04846402535223e-06
rps-8	-0.390923211034309	8.93950702994405e-08	2.09737169941591e-06
map-2	-0.44136536930754	9.01521557575818e-08	2.11249038978954e-06
nhr-145	0.602557645915706	9.0724175904436e-08	2.12324020162866e-06
soc-1	0.383744015603258	9.22752613651492e-08	2.15684794208365e-06
pals-16	-1.01143560308062	9.33293203094015e-08	2.17876891471985e-06
nhr-18	0.751161886444438	9.53691446209334e-08	2.22361938440798e-06
F30F8.9	-0.30073043089836	9.62771699592469e-08	2.24200227087707e-06
C18H9.5	1.03346100581792	9.73447695841349e-08	2.26405093129552e-06
chup-1	0.340554063743402	9.86553807177924e-08	2.29168992185345e-06
fbxa-30	3.17242931294027	9.93525879246356e-08	2.30502922430101e-06
rpl-1	-0.567401114146837	1.01611811996133e-07	2.35453031851608e-06
rpl-23	-0.43456310305104	1.02138781545501e-07	2.36381925784192e-06
tag-123	0.194854915153209	1.02942714429772e-07	2.37948720678236e-06
Y47D3A.21	-0.2718925286197	1.03843823856214e-07	2.39736000247364e-06
ptrn-1	0.284713923339063	1.04087419792469e-07	2.40002800913854e-06
Y32B12C.5	-0.812667829113277	1.05387510566823e-07	2.42701999150573e-06
ten-1	0.358372994010383	1.06604651985306e-07	2.45203779891602e-06
vit-3	-0.479527948646106	1.08747487411916e-07	2.49740078739544e-06
T08B2.15	-1.4687064524373	1.08843296879445e-07	2.49740078739544e-06
Y43C5A.7	-1.28848802524099	1.09458357789863e-07	2.50844300137992e-06
ddo-2	0.551113764844181	1.12860762746138e-07	2.5832574584116e-06
clec-76	-1.69233853312848	1.16262556848386e-07	2.65787547643884e-06
C03H5.6	-1.43528666733808	1.16679708270081e-07	2.66416298566497e-06
eef-1B.2	-0.345846594256705	1.20327403800408e-07	2.74410889494216e-06
tag-52	0.281295862761847	1.20962189382593e-07	2.75523353847641e-06
cif-1	-0.334660847416827	1.22566341523599e-07	2.78838426966188e-06
pgp-15	-1.59182164385817	1.24159353157201e-07	2.8212014961029e-06
rig-4	0.411937347814113	1.24402624037201e-07	2.82330700992902e-06
grdn-1	0.640468699030392	1.2607501963571e-07	2.85780207749822e-06
F56A8.3	-0.227566230175946	1.26622817846573e-07	2.8667528301351e-06
Y55F3AM.13	-0.408322301233775	1.27295584551936e-07	2.87850787456043e-06
let-19	0.599976962173501	1.29951102616023e-07	2.93501610799997e-06
pyk-1	-0.196030763815014	1.30686876914075e-07	2.94808206333483e-06
fipr-3	-1.23961768237794	1.31079842360894e-07	2.95339269819388e-06
msi-1	0.337035181702551	1.31484311172177e-07	2.95894945646294e-06
tpra-1	0.775124466081635	1.31972911462112e-07	2.96638393077787e-06
W05H9.4	0.357986260000185	1.32559668187032e-07	2.97600423932227e-06
atg-9	0.358533527853014	1.33307790872367e-07	2.98921991350884e-06
gst-33	-1.23054252434988	1.35523753923624e-07	3.03397818169099e-06
rnp-3	-0.248521411116455	1.35710527314697e-07	3.03397818169099e-06
add-1	-0.679802302541064	1.3578937877087e-07	3.03397818169099e-06
aagr-2	0.386142653698638	1.36768782968115e-07	3.05222333990509e-06
snpc-1.3	0.72047062351915	1.37080230084349e-07	3.05553625821785e-06
frm-7	0.391532612710579	1.37656874423006e-07	3.06474556761719e-06
ogr-2	0.304567135183079	1.42781072775411e-07	3.17505811417302e-06
Y97E10C.1	-0.931574259102478	1.44420397907774e-07	3.20448294338194e-06
K12H4.7	-0.509094662515558	1.44446179833444e-07	3.20448294338194e-06
B0250.7	-0.407724975256069	1.48123051287849e-07	3.28216869910404e-06
sms-3	0.466328310731933	1.50994698737022e-07	3.34009445635066e-06
prdh-1	0.559456322756386	1.51248985497504e-07	3.34009445635066e-06
K08D8.5	0.601757418197616	1.5127174828986e-07	3.34009445635066e-06
fmo-5	0.425114479693434	1.51580170637044e-07	3.34296691619062e-06
fbxa-93	-0.440991037842314	1.53897279010786e-07	3.39008036702256e-06
cct-7	-0.429785757259145	1.57929316176355e-07	3.47481568197411e-06
cil-1	0.304207576594832	1.58842409898343e-07	3.49080869396757e-06
cyp-34A2	1.21296012201001	1.6020423634095e-07	3.51661430263166e-06
tmem-189	-0.625620090460413	1.61980641334659e-07	3.55144924264271e-06
col-168	-2.7884823390539	1.64474395684091e-07	3.60191240828735e-06
rgs-6	-0.697122566869502	1.69813027963566e-07	3.71448660700702e-06
znf-593	-0.436483524638999	1.70831693638737e-07	3.73241367010695e-06
K09D9.1	2.62669513462466	1.71629016312018e-07	3.74546861441802e-06
W07E6.2	-0.401033459219634	1.72199059999948e-07	3.75353904506863e-06
rps-10	-0.54140658842094	1.79501161473195e-07	3.90816349939199e-06
C25E10.8	0.533149011388573	1.79894903691084e-07	3.91219241832142e-06
ram-2	-2.21684106688127	1.81644760714732e-07	3.94566939091351e-06
Y51H7C.1	-0.945790908861793	1.85961656571487e-07	4.0347652940846e-06
ctl-1	0.639464121470127	1.86276680866911e-07	4.03692793009378e-06
asp-3	-0.536514841436987	1.86627597808912e-07	4.03986252716613e-06
sek-3	0.23450146743624	1.89463664299623e-07	4.09652347284974e-06
W02A2.5	-2.53499466633893	1.92233256368104e-07	4.15161823027244e-06
K04C1.3	0.439202020630926	1.93466606715889e-07	4.1734465011462e-06
C26D10.3	-0.494508628352356	1.9467101292632e-07	4.19460092909977e-06
rps-24	-0.41616703093023	1.95631421163487e-07	4.21045536295147e-06
W02D7.4	0.619235597376857	1.96315746656105e-07	4.22033828763228e-06
rps-9	-0.431551670222454	1.97791373664774e-07	4.24719025282915e-06
F31D4.8	-0.957216133665905	1.99349354406925e-07	4.27273598768974e-06
snf-11	-0.776252429978745	1.99436892629282e-07	4.27273598768974e-06
Y116A8C.27	-0.418362465769308	2.00464675300724e-07	4.28985251505407e-06
math-39	-0.755367377460866	2.02503567422612e-07	4.32782699351299e-06
mter-4	-0.316105773574704	2.0287199053913e-07	4.32782699351299e-06
npa-1	0.803363192498157	2.02931821577825e-07	4.32782699351299e-06
rgs-11	0.362940417044789	2.05246049221223e-07	4.37220731670572e-06
phf-34	0.370969591861667	2.06192480729871e-07	4.38738279655182e-06
wht-3	1.07441450540287	2.06691813691554e-07	4.39302124655541e-06
C15H9.9	-0.424550874672973	2.09684898975999e-07	4.45158903307369e-06
idh-1	-0.293447896183868	2.12231056272962e-07	4.50054681096487e-06
abcf-2	-0.370925973209039	2.13883257254833e-07	4.53045823785208e-06
F53H2.3	0.334802287326682	2.15405435907461e-07	4.55755113038518e-06
rpl-35	-0.48633087222368	2.15756621267583e-07	4.55983497438795e-06
rpl-26	-0.533664042446447	2.16315707014834e-07	4.56650252668927e-06
snr-2	-0.300541395354889	2.19545408424186e-07	4.62946932094465e-06
R13A5.7	0.370574841302695	2.27705168809093e-07	4.79513522915839e-06
R102.4	-0.443746613453449	2.279134476251e-07	4.79513522915839e-06
T02C5.1	0.376672097168217	2.34471741289792e-07	4.92758661683681e-06
Y34B4A.2	0.294203878005682	2.36175179265357e-07	4.95782744737781e-06
skr-15	0.535417756776427	2.37687404071704e-07	4.98116266997245e-06
W09C5.1	-0.312265668983366	2.37818232669655e-07	4.98116266997245e-06
T14B4.3	-0.238941040655392	2.40953386761939e-07	5.04119663865995e-06
rpl-25.2	-0.41973097272517	2.43201649146739e-07	5.08256200100866e-06
AH9.6	-1.41614971649542	2.46431696536926e-07	5.14262798639796e-06
Y105C5A.1	0.380893888209335	2.46624483077551e-07	5.14262798639796e-06
clec-72	-1.37637676734381	2.523451358102e-07	5.25606879544222e-06
C49F5.3	0.3629314706419	2.53623388184264e-07	5.27683022741644e-06
nhr-81	-1.61257856846858	2.54466277668747e-07	5.28811682068298e-06
Y66D12A.6	-0.495448969157023	2.54917630540532e-07	5.28811682068298e-06
gei-8	0.531203618659094	2.55012141571397e-07	5.28811682068298e-06
B0432.9	-0.467128956879736	2.5561795187972e-07	5.29482223860467e-06
C49C8.3	-0.421169411137308	2.59275176823315e-07	5.36464951956939e-06
T10B10.8	-0.534160795168622	2.6116610407707e-07	5.3978167442434e-06
ssp-35	2.34099384973275	2.65217407779812e-07	5.47551269409731e-06
cpr-9	-0.524107601305816	2.67329502470883e-07	5.51304604325541e-06
eef-1B.1	-0.388177309563274	2.73435399401642e-07	5.63276922767383e-06
clec-65	0.513617456922459	2.80461349139648e-07	5.77116185617107e-06
Y54G2A.50	-0.40389140449038	2.83679130197994e-07	5.83097475295131e-06
nhr-28	0.369686121508999	2.84845020820581e-07	5.84852657207296e-06
trpl-1	-0.925455482328723	2.88047755693421e-07	5.90391728197842e-06
rnf-145	0.358966369280212	2.88172640190454e-07	5.90391728197842e-06
trpp-9	0.356784544324902	2.90958676339144e-07	5.95448836970917e-06
pgph-3	1.07726958890243	2.91341456898897e-07	5.95582001202477e-06
ostb-1	-0.257669108189364	2.93205995084422e-07	5.98740695408777e-06
fbxa-162	1.43122943236231	2.96346276439592e-07	6.04494809372862e-06
set-12	0.551470539652555	2.96991142480964e-07	6.05151734450887e-06
lap-1	-0.211596707038282	2.99773920618474e-07	6.10158731369588e-06
lmd-5	-2.32801396871678	3.02548669659677e-07	6.15138542455566e-06
selt-1.1	0.249801529699988	3.05789404987605e-07	6.21053974636798e-06
C25A11.10	-0.359544789285707	3.11964833916784e-07	6.32910473658446e-06
B0281.3	-0.655072121383137	3.16140220770598e-07	6.40688062547636e-06
col-133	2.91190017215178	3.17052988636981e-07	6.41843987579789e-06
aakb-1	0.406238876860592	3.2037839865933e-07	6.47583450676321e-06
fipr-6	-2.71286988942476	3.20579026046957e-07	6.47583450676321e-06
C40H1.7	-1.10101711315707	3.22490436660528e-07	6.50743350445453e-06
K08B4.7	-0.819685809735168	3.24143083405474e-07	6.53374864679463e-06
F42G2.2	0.60105646090603	3.31503808948046e-07	6.67494135611179e-06
cup-14	0.302855382728616	3.34333783993109e-07	6.72470076688285e-06
lam-3	1.01168297963317	3.40776642502551e-07	6.84694420187869e-06
M163.1	0.670734964641069	3.41603036429416e-07	6.85619970118397e-06
rla-1	-0.458059194528773	3.50087460341918e-07	7.01897276103701e-06
W05H9.1	0.616072863399421	3.50579316207114e-07	7.02132463848137e-06
attf-5	0.79423554296527	3.51359539996249e-07	7.02944070092815e-06
fbxa-34	1.25600406980232	3.5332062583764e-07	7.06113907457612e-06
dsh-1	0.194384274657056	3.55438652407499e-07	7.09590306499571e-06
Y34F4.2	1.37066771460206	3.59284745805914e-07	7.16505515412517e-06
afmd-2	0.442850921607074	3.61776235681734e-07	7.20707472273091e-06
C23H4.6	0.8834600960799	3.64916694486268e-07	7.26191969728194e-06
dpy-31	0.449337216097934	3.71402292171576e-07	7.38314673281905e-06
ccb-1	-0.416885071475087	3.7428014132789e-07	7.43247407768286e-06
aex-5	-0.373414913766387	3.78123661089369e-07	7.50085306960985e-06
dhs-20	-0.524925091666972	3.78557188601628e-07	7.50151485996419e-06
C01G10.10	0.310306715323619	3.80898843764137e-07	7.53994691151269e-06
ent-4	-0.832095788954405	3.81842986027427e-07	7.54912081487729e-06
tpi-1	-0.192650589979066	3.82167697285744e-07	7.54912081487729e-06
C16C8.13	0.5881803295382	3.82608599989353e-07	7.54987454252675e-06
C25H3.10	1.00007971457943	3.84823002126589e-07	7.58558569701896e-06
spp-14	-0.374530077571669	3.87011807294941e-07	7.62071779364597e-06
cex-1	-0.614335406927882	3.89447241691966e-07	7.66062748453053e-06
nhr-64	0.450155967689198	3.90058531728327e-07	7.66460926182308e-06
coel-1	0.914491585807576	3.91397195439539e-07	7.68286055048126e-06
sem-4	-0.511113180509691	3.94956416031623e-07	7.74461608256152e-06
C24G6.8	-0.417613459962235	3.95434650399391e-07	7.7458912814911e-06
T16G12.8	0.358146237198421	3.97590975826677e-07	7.78000045182347e-06
K07H8.9	-0.383059651800067	3.99140214463113e-07	7.80217149147604e-06
mrpl-35	-0.321525165701628	4.03204939753563e-07	7.87341645897946e-06
nft-1	0.28744368212182	4.07229962992953e-07	7.94373869538595e-06
W07G1.25	3.36135731773755	4.12962905238884e-07	8.04719607235771e-06
lips-5	-0.758177272777237	4.23666455341266e-07	8.24719768621742e-06
T14F9.2	0.334272585767312	4.25322534654519e-07	8.27084671642491e-06
srv-1	-0.671725541410074	4.27641084968316e-07	8.30731583297e-06
Y53F4B.38	-0.721633595063941	4.36057738211329e-07	8.46204799224593e-06
K01A6.6	-1.0661887099637	4.37682593962816e-07	8.47659089540086e-06
eef-2	-0.457522432019295	4.37711511082259e-07	8.47659089540086e-06
chd-7	0.432657358502668	4.39296368845074e-07	8.49850333371492e-06
hrg-2	1.00238553181254	4.56110760435982e-07	8.81469310838445e-06
atg-16.1	0.4096360660684	4.57129194246683e-07	8.81999598319059e-06
rps-18	-0.42062453288328	4.57326154681599e-07	8.81999598319059e-06
cnc-10	0.642759953016892	4.59833401955814e-07	8.85755688569584e-06
C46A5.6	-0.377420964129324	4.60218735019084e-07	8.85755688569584e-06
F27D4.3	-0.360727520326195	4.64178466362072e-07	8.92436297938957e-06
hst-2	0.349751166269961	4.64641964572934e-07	8.92436297938957e-06
K05C4.4	-0.396540590448379	4.69362686727852e-07	9.00580647430942e-06
ddx-17	-0.301425981358538	4.6990037107032e-07	9.00690424957486e-06
abcf-3	-0.436661974961004	4.71501378429068e-07	9.02836040861217e-06
arrd-24	1.57087866237011	4.7285629920564e-07	9.04506549480502e-06
rab-14	0.275444473708929	4.76448702584811e-07	9.10449274072871e-06
fat-4	-0.226679201373535	4.77050863834946e-07	9.10671638844185e-06
fipr-4	-2.65969382289217	4.77640168923535e-07	9.10869034246245e-06
gst-26	-0.52117042403283	4.78807356744477e-07	9.12166942025605e-06
K04F10.7	0.26655692904857	4.81550043891538e-07	9.16460621603124e-06
acs-11	0.351108932684178	4.82229225843035e-07	9.16822420654516e-06
dhs-12	-0.371188195083536	4.8517488482716e-07	9.21488185508605e-06
ZK228.4	0.559824626950844	4.88543668610842e-07	9.26947329127413e-06
F38A5.2	-0.216569200375958	4.92489425279794e-07	9.33489056248233e-06
lact-2	0.483807269444402	4.94549665619068e-07	9.36447275928793e-06
R10E4.1	0.292638460491055	4.96283331191223e-07	9.38781768568181e-06
T25G12.13	-1.04005024410846	5.03356754240819e-07	9.50967920906526e-06
W09B6.4	-0.289770408753117	5.03740075461528e-07	9.50967920906526e-06
tbc-1	0.264431392848364	5.09874224215718e-07	9.61579698908235e-06
C24H12.4	-0.418702636850044	5.11180531600253e-07	9.62928599098497e-06
rpl-2	-0.498717293604932	5.11616816762031e-07	9.62928599098497e-06
C28G1.6	0.678930388071656	5.12826103734874e-07	9.64236523632291e-06
F40G9.20	1.24595027510768	5.19378506687598e-07	9.75578104846264e-06
R05H10.3	-0.3305913404417	5.29731100607339e-07	9.94027949147665e-06
pcs-1	0.244416063284098	5.32546795067151e-07	9.98312222032881e-06
skr-16	0.397715576640248	5.33079349801803e-07	9.98312236901558e-06
W02A2.4	-1.33526733722805	5.35678259741848e-07	1.00212619276457e-05
C04F12.7	2.38505927465385	5.36185090868914e-07	1.00212619276457e-05
nol-58	-0.417268410678197	5.370453023793e-07	1.00273418709187e-05
rpn-11	-0.35301220166438	5.42226963974598e-07	1.01054865889473e-05
rpl-18	-0.480120580359223	5.42308732982024e-07	1.01054865889473e-05
F07C3.2	-0.844563191775968	5.54717103258155e-07	1.03264417255982e-05
Y48A6B.9	0.341888877931341	5.57118908698165e-07	1.03608641492617e-05
K05C4.9	0.715823936817783	5.69704696331184e-07	1.05844244176654e-05
F48C1.9	1.99496057559057	5.73997815072282e-07	1.06522158242741e-05
T28H10.2	0.695533429075671	5.74490035119016e-07	1.06522158242741e-05
F19B2.6	0.745907312322987	5.77542876686133e-07	1.06982398877058e-05
Y53F4B.23	-1.14029491655242	5.8350080059869e-07	1.07979328805756e-05
rps-2	-0.548830257417049	5.84241146083357e-07	1.08009709314385e-05
F23D12.2	0.730620543606579	5.85093372538126e-07	1.08060693217731e-05
ndnf-1	1.07092826090348	5.91872317799995e-07	1.0920510304605e-05
sinh-1	0.367944589334658	5.93837149459334e-07	1.09459893842327e-05
nspc-3	0.984030889780952	5.94556785704117e-07	1.09484887080642e-05
cbp-2	0.598650827212477	5.96589242943066e-07	1.09751343947112e-05
dnj-14	0.259056654284597	6.01941581734846e-07	1.10627420501975e-05
drd-1	-0.842801272539957	6.07058201403739e-07	1.11458501895343e-05
acd-2	0.780563887396655	6.14992149321745e-07	1.12804724375591e-05
C05C8.8	-1.78932719947226	6.20448364096846e-07	1.13668592722456e-05
rpl-15	-0.533746374532887	6.20914536155952e-07	1.13668592722456e-05
Y57G11C.1147	-1.47854026815483	6.23892393982222e-07	1.14102310415519e-05
Y94H6A.3	-0.386789683916399	6.30769470029537e-07	1.1524760706797e-05
rpl-28	-0.441475386037272	6.58152641890562e-07	1.20111439387242e-05
fbxa-74	0.838938003803388	6.58671501600794e-07	1.20111439387242e-05
M176.5	-0.67790097454803	6.68054012771276e-07	1.21703989537516e-05
mans-3	0.326838593470235	6.73224548605925e-07	1.22526867846278e-05
R151.10	-0.219103188798547	6.77200118651578e-07	1.23130877053758e-05
asm-1	0.509021918651143	6.90040389066761e-07	1.25295675160264e-05
ruvb-1	-0.394613187840462	6.90442934175574e-07	1.25295675160264e-05
tag-196	0.562871733387395	6.91921077104063e-07	1.25442480767822e-05
sdc-2	0.597270117208048	6.94483486788645e-07	1.2578538592599e-05
C16C8.14	0.381596087398699	7.14190861936732e-07	1.29229941099092e-05
F47F2.1	-0.651729316585701	7.22205307386886e-07	1.30554105036399e-05
Y75B8A.28	1.11208500601443	7.29940168369255e-07	1.31825225397399e-05
pfn-1	-0.249507670491559	7.32250870103203e-07	1.32115253233442e-05
ttr-33	1.04433310693221	7.43607905073232e-07	1.3403532488945e-05
klc-2	0.256386298491507	7.51138536785832e-07	1.3526266100468e-05
pde-6	-0.538736530903722	7.64227058422692e-07	1.37487528188021e-05
ZC416.2	0.5845132597379	7.7292144838397e-07	1.38844668267309e-05
Y75B8A.31	-0.252586361455271	7.73252073354691e-07	1.38844668267309e-05
Y59H11AR.4	-0.822487186255814	7.77546904294795e-07	1.39482241798184e-05
bca-2	-0.257871240209349	7.9125494706417e-07	1.41805595006357e-05
cyp-33C7	0.636615353675335	7.93625461773295e-07	1.42094583633259e-05
rpl-31	-0.479676115809532	8.01445457672333e-07	1.43357791503106e-05
F44A6.5	0.823351062884365	8.02334416032141e-07	1.43379990113809e-05
K04C1.2	0.288532516503864	8.05013467437936e-07	1.43721737719919e-05
ZC412.13	2.28012475928201	8.07777573512455e-07	1.44078005642859e-05
mnk-1	0.410470085171175	8.13297734296763e-07	1.44924708432767e-05
F26D2.10	3.18645319898733	8.16878330039195e-07	1.45424512582286e-05
smcl-1	0.608060088679695	8.22230950385546e-07	1.46238533168192e-05
F54C1.1	-1.33048178306255	8.23201620915818e-07	1.46272394177137e-05
droe-4	0.794418854427104	8.24770505378272e-07	1.46324876137523e-05
idh-2	0.284486281550345	8.25058114143615e-07	1.46324876137523e-05
tbb-1	-0.350549180771742	8.29608494469297e-07	1.46992824549352e-05
col-119	-0.588724362823343	8.32890426358434e-07	1.47434975755573e-05
K05F1.10	-0.610469669869541	8.34207534699075e-07	1.47528815523291e-05
grd-13	-1.20783127268643	8.36739937057173e-07	1.47791524328023e-05
ubc-14	-0.338785977951902	8.37269811353679e-07	1.47791524328023e-05
scav-5	-0.748480032367937	8.38628392260438e-07	1.47806027068326e-05
epi-1	0.499327089208855	8.38928906437103e-07	1.47806027068326e-05
Y37E3.1	-0.315796778181397	8.62102389680616e-07	1.51746210300027e-05
F09B12.3	-0.770296173792867	8.84559734448931e-07	1.55553065496995e-05
daf-1	0.291299441805069	8.91602538002596e-07	1.56532862998089e-05
T03F6.4	-1.23695510457758	8.91801438610685e-07	1.56532862998089e-05
R31.2	0.163407318368073	8.95449382708563e-07	1.57026137776003e-05
C09F12.2	-1.13764993913334	9.05023430702947e-07	1.58556721793995e-05
mrp-8	0.356514119586509	9.12299838353019e-07	1.59682285431986e-05
nbs-1	-0.307431728079682	9.28801450483541e-07	1.62418955137728e-05
R02F11.3	-0.406881502759214	9.38554403761411e-07	1.63971489775502e-05
R07E4.5	0.372617514394997	9.42976885531127e-07	1.64590732738981e-05
F59A6.12	-0.651841893245593	9.60892721110311e-07	1.67561813487757e-05
M01A8.1	1.33583730305127	9.68600901938879e-07	1.68652473086185e-05
lyst-1	0.685039465764951	9.68946513996697e-07	1.68652473086185e-05
shw-3	-0.930114279797918	9.77764967094393e-07	1.70029518303817e-05
C30G7.4	-0.819556659653508	9.9185942450786e-07	1.72320637366305e-05
F57B9.1	0.22757828146195	9.95344333826469e-07	1.72765971128805e-05
noa-1	-0.410835911479105	1.00413318678258e-06	1.7404351725089e-05
vha-16	-0.202785908078621	1.00456142998753e-06	1.7404351725089e-05
T04D3.8	-0.283070607020689	1.01369777392401e-06	1.75464251800364e-05
cysl-2	0.780946538817192	1.03231623576124e-06	1.78522141656643e-05
ceh-88	0.497196529661802	1.0367521466949e-06	1.79124016054771e-05
C09F5.3	-1.2360319386697	1.04608635581581e-06	1.80570302266327e-05
impt-1	0.272587509902486	1.06366315982388e-06	1.83435414848744e-05
cct-6	-0.304682206895295	1.06753830707048e-06	1.8393449544433e-05
F22H10.5	0.881277438384883	1.0978176363731e-06	1.88977864200644e-05
R10E8.1	-0.643172141571295	1.1042083576879e-06	1.89903576818507e-05
sli-1	0.245542384799966	1.10770536910569e-06	1.90330383586208e-05
W02F12.2	0.598289363198243	1.1145362067719e-06	1.91328715495843e-05
nhr-31	-0.740123522750386	1.12637373925198e-06	1.93183916889457e-05
F47B8.4	2.13485703258813	1.14623419628141e-06	1.96410477545624e-05
R07A4.2	-1.03042169939935	1.14825440116381e-06	1.96458601342878e-05
hil-6	1.07568000778048	1.14861104807316e-06	1.96458601342878e-05
col-178	-0.571816668027684	1.15022962301745e-06	1.96556103127485e-05
act-2	-0.339048895189662	1.16017994301699e-06	1.98075894460806e-05
nhr-22	0.238085316206916	1.16576532200965e-06	1.98848377856169e-05
glo-4	0.272604674380382	1.16715466594382e-06	1.98904376070754e-05
fib-1	-0.508768601290151	1.18148467068626e-06	2.01163593430378e-05
Y71F9B.9	0.428889970718662	1.19475460557606e-06	2.03238383267956e-05
ile-2	0.239863423657012	1.21345988069356e-06	2.06233172470368e-05
npp-11	-0.409852521761244	1.21574777873352e-06	2.06434853805604e-05
icd-2	-0.393140858449305	1.22780740522354e-06	2.08293915097923e-05
pitr-5	0.878049265730418	1.24205205218896e-06	2.1051996175709e-05
cyl-1	0.266135122103535	1.25227167938113e-06	2.12060387549039e-05
cest-32	0.576222765995465	1.26048554789344e-06	2.13258683039806e-05
ttbk-7	0.57369610519118	1.26540704006673e-06	2.1385305515397e-05
nhr-277	-1.47821741173849	1.26628022629311e-06	2.1385305515397e-05
R10E8.10	-2.18641438140674	1.27530084271008e-06	2.15182624639452e-05
ptr-8	0.749984032189078	1.31280908527715e-06	2.2131222223566e-05
Y47H10A.5	1.38106571653792	1.31423750965255e-06	2.21353965462235e-05
let-805	-0.681583513307927	1.31668439779999e-06	2.21539308925439e-05
T28F4.5	0.707902317045202	1.31770153340374e-06	2.21539308925439e-05
elo-2	-0.622101527275659	1.3293628200902e-06	2.23299600586119e-05
math-14	-0.970272526249633	1.35862329201627e-06	2.27765480236819e-05
ZK632.11	-0.299153411050205	1.35909793013731e-06	2.27765480236819e-05
papl-1	-0.454468531056608	1.35959443286568e-06	2.27765480236819e-05
W01C8.5	-0.654058471577752	1.3623728819622e-06	2.28027161118424e-05
txt-4	-1.40805446656585	1.36571530358759e-06	2.28382685825628e-05
dop-4	0.612028667976929	1.39151090282086e-06	2.32488978469517e-05
madd-3	0.218037976598827	1.40711217692125e-06	2.34886241037986e-05
C43C3.4	-1.20707158972389	1.41674356773843e-06	2.36283584704846e-05
F40G9.15	0.975356641979207	1.42203525209741e-06	2.36955314096161e-05
ifd-1	-0.716648669321885	1.43017640841073e-06	2.38100239361168e-05
C55A1.6	-0.99184341234505	1.44571086318158e-06	2.40283448548285e-05
ZC13.1	0.226274870198031	1.44585367525053e-06	2.40283448548285e-05
glc-1	0.732732894620131	1.45021517061154e-06	2.40794805919256e-05
T05E12.6	0.433108726216961	1.45695938975645e-06	2.41700537348446e-05
F32A11.5	-0.646378177822235	1.45925635931869e-06	2.41867548291672e-05
Y47H10A.2	0.494423251138532	1.46603427449609e-06	2.42776311923178e-05
asm-3	-2.56806932603119	1.47735991478312e-06	2.44232436636463e-05
H14N18.4	-0.433516366814343	1.47743296247599e-06	2.44232436636463e-05
C54G6.3	-1.30856163417367	1.50502834100301e-06	2.48574989255e-05
Y37E11AL.3	-0.322729971037178	1.50951517654838e-06	2.490965801019e-05
Y39G10AR.32	0.316123298164913	1.51735011241427e-06	2.50169263037098e-05
rps-5	-0.571572604327748	1.54803803750979e-06	2.5500457865693e-05
F40F9.3	2.91021254207445	1.57065911821045e-06	2.58503738630141e-05
F07E5.5	-0.391183507861021	1.57294467783821e-06	2.58652815182062e-05
txl-1	-0.26846557231501	1.57793152164281e-06	2.59121818422331e-05
grl-4	-0.590268805764847	1.5785613818324e-06	2.59121818422331e-05
Y47D3A.20	0.359183428046794	1.60204253615224e-06	2.62746188825108e-05
Y18D10A.23	-0.435182971990769	1.63981164663875e-06	2.6832985231857e-05
tag-267	-0.332337260717645	1.64004436084664e-06	2.6832985231857e-05
smr-1	-0.277516881330581	1.64038200553228e-06	2.6832985231857e-05
cpr-8	-0.423222755440469	1.64383920804387e-06	2.68660939790674e-05
pcyt-1	-0.390414760057502	1.65019277151953e-06	2.69464405007885e-05
T28A8.8	-0.457186366502959	1.66665853959942e-06	2.71916283579903e-05
K10B4.3	0.373078393169392	1.68438151458862e-06	2.74568833673724e-05
tnt-3	-0.468253756671121	1.69891632454595e-06	2.76697527540734e-05
F54A3.6	-0.297464946163571	1.71377459400853e-06	2.78875160931284e-05
Y34B4A.4	-0.55235100259153	1.7439702175192e-06	2.8354263397758e-05
D2023.1	-1.0376873940204	1.76510237981439e-06	2.86729715875221e-05
Y73B6BL.288	-0.389609514603199	1.81132553595961e-06	2.93983623351505e-05
col-167	-2.52157685561073	1.81372634750447e-06	2.94118634172307e-05
C18D11.3	-0.288215587394331	1.81814614130967e-06	2.94580532108826e-05
nhr-201	0.540928799590012	1.8230713235228e-06	2.95123445861471e-05
F59C6.14	-0.850803710433823	1.83226275158333e-06	2.96355457646083e-05
mtg-1	-0.262880494389655	1.85010250518333e-06	2.98982944501437e-05
psd-1	0.277771542397096	1.85678759264266e-06	2.9980482525133e-05
pph-4.1	-0.264761006359247	1.88030178138731e-06	3.03340251238265e-05
cyp-13A8	1.65830894412198	1.88698630670269e-06	3.04156881388208e-05
fbxa-190	-0.728459622665837	1.89068994375507e-06	3.04492041972789e-05
C31E10.5	0.327874477293288	1.89819130335207e-06	3.05437718220068e-05
F58F12.12	-1.0863531695931	1.90458414830463e-06	3.06203554409251e-05
tep-1	0.508292506210806	1.91085283903194e-06	3.06948134708593e-05
T22F3.2	-0.23256659222063	1.9168260506353e-06	3.0764401665419e-05
nspe-2	-1.76873673471159	1.93490809647183e-06	3.10280471997099e-05
dnpp-1	-0.303645736407071	1.93780901864305e-06	3.10480067209254e-05
F41D9.2	-0.793032512574255	1.95687829769533e-06	3.13267639356077e-05
eor-2	0.418273150976141	1.97236422892411e-06	3.15477302349926e-05
pxd-1	0.526933150727887	2.00149868254903e-06	3.19864401560648e-05
nhr-225	-0.977857903591778	2.01457732680404e-06	3.21352556187636e-05
pals-17	-0.64000379512779	2.01584525203527e-06	3.21352556187636e-05
taf-11.3	-0.404398633215907	2.01595330244671e-06	3.21352556187636e-05
ZK154.5	0.635663828274309	2.03591264393712e-06	3.24258440299449e-05
nhr-180	0.707067240846385	2.03798622264087e-06	3.24313155599539e-05
rps-14	-0.464600140216806	2.06497870397139e-06	3.28254047001528e-05
F20A1.4	-1.71181400419836	2.06625293642272e-06	3.28254047001528e-05
C33G3.4	0.486399985474622	2.06946521155252e-06	3.28485985230851e-05
H25K10.4	-1.61560676037724	2.07300280051553e-06	3.28769124352489e-05
C08F11.13	1.5244718063166	2.09666084762527e-06	3.32240103546774e-05
hsp-1	-0.400443651124669	2.1093652573258e-06	3.33970955353289e-05
rpl-12	-0.356193593838209	2.12229923735104e-06	3.35735202560191e-05
Y39B6A.34	-0.332649732054948	2.15543484806299e-06	3.40689558699737e-05
R04B3.2	0.474726787924869	2.164445992253e-06	3.41779557110401e-05
C10B5.1	-0.305718271066096	2.16597734901929e-06	3.41779557110401e-05
pmp-4	0.413629104545305	2.18275117403984e-06	3.4413669897856e-05
mdl-1	-0.706636094048659	2.22468154315196e-06	3.50452774856526e-05
F53F1.3	-0.276580300525591	2.22974603313294e-06	3.50742530528603e-05
C02B10.4	-0.249045660343508	2.23026297018081e-06	3.50742530528603e-05
ufd-1	-0.281967920349616	2.24261501652335e-06	3.52389447608941e-05
dhs-9	-0.252290104820382	2.25749668072178e-06	3.54430760274794e-05
Y102A11A.3	-1.0775982731319	2.26611370084593e-06	3.55290609329589e-05
mig-15	0.190724271743049	2.26676394301819e-06	3.55290609329589e-05
tag-131	0.185466283273078	2.27535134178423e-06	3.56224172480128e-05
W03D8.8	0.832704087237374	2.27652063710228e-06	3.56224172480128e-05
ugt-16	-1.04227908618614	2.28243457817459e-06	3.56851698102259e-05
ceh-41	0.371024057688385	2.35493432481931e-06	3.67660575581957e-05
mth-1	-0.644495259198538	2.35549104488387e-06	3.67660575581957e-05
eif-2alpha	-0.297471651758197	2.38065944165588e-06	3.71279882639609e-05
metl-2	-0.311479196908941	2.38900027831195e-06	3.72270982686914e-05
drd-10	-1.09089378903311	2.39898514240434e-06	3.73516407637141e-05
T23F6.1	-1.0718520349723	2.43904520850258e-06	3.79421030479896e-05
byn-1	-0.339783086868205	2.44095680549853e-06	3.79421030479896e-05
F36F2.2	0.583255142657658	2.45686130898978e-06	3.81576819373011e-05
daf-19	0.293916288091871	2.45991719315326e-06	3.81735163103071e-05
tbx-33	0.322512553465896	2.49017777490532e-06	3.86111435635858e-05
R09E12.9	-0.757370126213445	2.49357075191403e-06	3.86317994341987e-05
M153.4	-0.737126619080588	2.52520408009251e-06	3.9089575297617e-05
B0228.6	0.731834124984389	2.57275369118569e-06	3.97927728506328e-05
E01G4.5	0.525751604416847	2.60668890165016e-06	4.02844106762852e-05
lgc-35	-0.907751622644923	2.60895976911337e-06	4.02862931069187e-05
rpl-43	-0.635405162016619	2.63447012492321e-06	4.06467300097206e-05
hpd-1	-0.362072065483489	2.63771663265546e-06	4.06633519701968e-05
nhr-45	0.559617521827184	2.64072163593088e-06	4.06762266122928e-05
F58A6.1	0.451181511801401	2.64335404011799e-06	4.06833455139999e-05
Y13C8A.1	1.15647070107484	2.64861134835683e-06	4.07308189797351e-05
C17F4.7	0.591678345488473	2.67641142560182e-06	4.11245972002718e-05
fbxa-95	0.35475895221804	2.72921068448017e-06	4.19015425808888e-05
F31E9.3	-1.00598643437392	2.75098773485951e-06	4.21892330357425e-05
T11B7.2	-0.593188657417562	2.752450229527e-06	4.21892330357425e-05
dhhc-2	-0.61868517599536	2.7794594271082e-06	4.25251372382649e-05
F52H2.5	0.345318008232892	2.78042107829146e-06	4.25251372382649e-05
F31D5.2	-0.642553683260987	2.78117028988119e-06	4.25251372382649e-05
W04A4.2	-0.447543045702496	2.80628808443434e-06	4.28742269199724e-05
Y51H4A.24	-0.566042576895561	2.83536976553111e-06	4.3283258651992e-05
ttr-23	1.22513464967058	2.84233564210271e-06	4.33542912504941e-05
col-139	1.98230286466518	2.85596878820567e-06	4.34918533966249e-05
fbxa-64	0.45365392273113	2.85599442714421e-06	4.34918533966249e-05
C01G10.15	-1.64659900931858	2.87637558871126e-06	4.37666694691407e-05
dlat-1	-0.219317997409956	2.930612831785e-06	4.45557730289065e-05
dlhd-1	-1.29373889418539	2.93374162659853e-06	4.45671965415042e-05
pept-2	-0.625151515283717	2.98224044979834e-06	4.52672708274653e-05
dli-1	-0.279810544940098	2.99354032262872e-06	4.54020282265356e-05
tnt-4	-1.1197512108224	3.00027079065976e-06	4.54673211331511e-05
trap-1	-0.296338604930638	3.014199581574e-06	4.56415067497466e-05
ZK1010.2	-0.243588210429259	3.01717539558824e-06	4.56496932733633e-05
tbc-12	0.214048935583751	3.03748888675094e-06	4.59199731218009e-05
C16D9.6	0.535197398894765	3.04789660056731e-06	4.60401850719056e-05
fbxa-60	0.775105943225549	3.10874046641771e-06	4.69214563473964e-05
C26E1.2	0.777887346002264	3.1143651609794e-06	4.69685352435396e-05
dct-1	0.59239704786543	3.14649019959019e-06	4.74148756282297e-05
rps-19	-0.368006974647904	3.15833645897445e-06	4.75551608513535e-05
alg-5	0.372402171762149	3.23552127830915e-06	4.86782358613029e-05
bath-40	-0.274626474691708	3.24453505804876e-06	4.87747026448934e-05
srpr-2.1	-1.96622692473673	3.24739543911801e-06	4.87785856584184e-05
rps-15	-0.34065564496597	3.26136835358846e-06	4.89492483237545e-05
rpn-9	-0.258480701724663	3.2759236483064e-06	4.91283717689214e-05
C36B1.9	0.523655343560261	3.28193270782666e-06	4.91791451166416e-05
nhr-2	0.344241420735532	3.28586372171705e-06	4.91987231048785e-05
nit-1	0.778385144810014	3.29366868669908e-06	4.92762276144142e-05
E04F6.15	0.708124047721261	3.30721479050905e-06	4.94394325860307e-05
F02D10.6	0.356091227922331	3.32225592332368e-06	4.96247087957178e-05
nas-9	0.792367940666169	3.33588175195137e-06	4.97885663392359e-05
maoc-1	0.373834731014707	3.38507724759857e-06	5.04457000417864e-05
Y53C12B.7	-0.681033863492426	3.38529236384121e-06	5.04457000417864e-05
F29C6.1	0.773250210640199	3.39544118576769e-06	5.05567438192226e-05
pes-1	0.428202261771269	3.40765678407142e-06	5.06983603763515e-05
car-1	-0.407390691085607	3.42765343608279e-06	5.095542530754e-05
unc-7	-0.715322629088745	3.43657824679188e-06	5.10476195042477e-05
ugt-28	0.458709784127772	3.4636501963294e-06	5.14090155030807e-05
pqn-59	-0.382775843506579	3.52714592017441e-06	5.23100296041056e-05
Y110A2AL.9	0.763669788847299	3.55858462827528e-06	5.27345671475481e-05
C33G3.6	0.737305946095768	3.56308269051243e-06	5.27595166795782e-05
clec-190	-0.753178189909563	3.56865530848053e-06	5.2800325503375e-05
nhr-232	0.736303316031887	3.59464976061944e-06	5.31429845525016e-05
acr-19	-1.06045622424762	3.6388549088664e-06	5.37541167230965e-05
M01G12.9	0.697603249516598	3.6559487436176e-06	5.39448234679684e-05
slc-25A26	-0.244973546481263	3.65972159782386e-06	5.39448234679684e-05
T08B1.1	-0.350971662719937	3.66039770891154e-06	5.39448234679684e-05
bigr-1	-0.537722122052161	3.67603227168741e-06	5.41089671963209e-05
eif-3.B	-0.371526345826646	3.6773084502354e-06	5.41089671963209e-05
pqn-37	-0.591556189929496	3.68867664571388e-06	5.42336724710215e-05
Y52E8A.3	-0.989113821647216	3.72341832088405e-06	5.47015672753076e-05
bgal-2	-0.362477509527435	3.74920939098373e-06	5.50373369172913e-05
gsp-1	-0.274301184149696	3.75298551770104e-06	5.50496608097212e-05
T10B5.3	-0.333973759886459	3.75706479412003e-06	5.50664086243738e-05
F55B11.3	-0.37964300166537	3.76476015503669e-06	5.51360889580607e-05
cey-3	-0.28469726246388	3.78373269983038e-06	5.53706894543484e-05
pcaf-1	0.275836967061412	3.81357772882447e-06	5.5763906477803e-05
Y43F11A.6	-0.482858119502423	3.82169853341984e-06	5.58308952349643e-05
nekl-2	0.627139695269699	3.82411551700065e-06	5.58308952349643e-05
F56A11.5	-0.278284241904854	3.88093540985394e-06	5.66163542358926e-05
fkb-8	0.594746894845561	3.90372285757925e-06	5.69045013127376e-05
K04B12.2	0.365723379794075	3.93073734256122e-06	5.72445323226421e-05
Y37H2A.14	1.02401534108883	3.93315681380364e-06	5.72445323226421e-05
ZC404.1	-0.853614604080859	3.94598523639973e-06	5.7386686766136e-05
Y45F10D.2	-1.74552239319226	4.03224166506667e-06	5.85956606615038e-05
pcp-4	-0.552607562997816	4.20996362350669e-06	6.11308892999663e-05
Y38H6C.21	1.12393626227155	4.23496921082544e-06	6.14463876363264e-05
fmo-1	1.03163047559585	4.24667106913826e-06	6.15685196149001e-05
fbxa-120	0.40558062218609	4.26474085846072e-06	6.17387337801903e-05
clec-5	0.496906313477693	4.26499841274653e-06	6.17387337801903e-05
dve-1	0.567737135116076	4.30054071507481e-06	6.21969649077089e-05
cah-6	-0.96266168470739	4.30328942095906e-06	6.21969649077089e-05
act-1	-0.459866810293577	4.37081332146339e-06	6.31242423144474e-05
nars-2	-0.271382432958152	4.40241470086293e-06	6.35316905176108e-05
gar-3	-0.634643117754097	4.41361920797804e-06	6.36250104153866e-05
Y73C8C.8	0.685751756786577	4.41566939882738e-06	6.36250104153866e-05
M01G12.14	0.862220768583517	4.42203521383864e-06	6.36677973261284e-05
yars-2	-0.321809714223766	4.45107715137679e-06	6.40344772007229e-05
mdt-4	-0.281574866321129	4.45433469912209e-06	6.40344772007229e-05
F48E3.2	-0.696310302411196	4.47842233697413e-06	6.43314215547258e-05
Y71H2AM.12	-0.580780452852078	4.52212317770723e-06	6.49094342184531e-05
zip-3	-0.476604743968794	4.52916450419099e-06	6.49607634243033e-05
vrp-1	-0.406394227468264	4.5378455732649e-06	6.50355146150029e-05
sex-1	0.405681466809186	4.55735155620492e-06	6.52651736230844e-05
eef-1A.1	-0.463956514335307	4.58451052827713e-06	6.55996612247251e-05
klo-2	-0.371110269100716	4.58770702366449e-06	6.55996612247251e-05
ccnk-1	-0.220245484435112	4.61280104103385e-06	6.59082075573327e-05
sph-1	0.314871130553599	4.61886220404277e-06	6.59445475072245e-05
syx-2	0.575050539627719	4.62339445730555e-06	6.59590201648781e-05
let-49	-0.224493125690255	4.67498323954841e-06	6.66037144643924e-05
F19C7.1	-0.515532152445041	4.67569018644726e-06	6.66037144643924e-05
F08G2.5	1.83011318212673	4.69301846742268e-06	6.67997905773011e-05
lys-4	-0.728648662722258	4.69785123752201e-06	6.6817844687851e-05
Y43F8C.13	-0.479712442882267	4.7066919428929e-06	6.68928333293937e-05
sir-2.3	0.575793326703145	4.71449454979751e-06	6.69529657806849e-05
fbxa-212	-0.44643254571324	4.73549636952247e-06	6.71694313233317e-05
frm-1	-0.168825113439507	4.7369032438624e-06	6.71694313233317e-05
cest-24	-0.579212841725065	4.74446474097443e-06	6.72258019911615e-05
dpy-22	0.677379472450301	4.80202448604044e-06	6.79899932139834e-05
cpd-1	0.423062138505771	4.83483407357235e-06	6.83876627715143e-05
asns-2	0.990396512006313	4.83740749146634e-06	6.83876627715143e-05
fkb-6	-0.288335903567369	4.85557337495691e-06	6.85927494249753e-05
ZC449.8	-0.477281422474368	4.88259593752141e-06	6.88966299826645e-05
nubp-1	-0.320683132693304	4.88443514600241e-06	6.88966299826645e-05
ced-9	-0.284893876318891	4.90548243921776e-06	6.9141484064343e-05
rpl-20	-0.435614954711174	4.99153486766216e-06	7.03015121181028e-05
twk-33	0.638436621680327	5.01155826077656e-06	7.05305339012893e-05
Y50D4A.5	-0.308147903819602	5.10539682686754e-06	7.17972760063458e-05
tsn-1	-0.296086408329875	5.16077046901969e-06	7.25215916133757e-05
atz-1	0.626032039970144	5.20148468459298e-06	7.303897520403e-05
Y37B11A.8	-0.464240529089197	5.27224179093491e-06	7.39771292012469e-05
ttr-41	-0.410656516910329	5.29033900333872e-06	7.41755384866026e-05
clec-119	1.55453849347758	5.35358400733674e-06	7.50061926767821e-05
F19B10.14	1.65822995664247	5.38673331851155e-06	7.53427077362729e-05
col-81	2.07292336570216	5.39177863551255e-06	7.53427077362729e-05
irg-1	1.96398502719057	5.39181822951709e-06	7.53427077362729e-05
inx-6	-1.08035542521587	5.39367938664666e-06	7.53427077362729e-05
chd-3	0.374674135677919	5.42559855548775e-06	7.57321448407844e-05
F35E12.6	-0.399199327004408	5.44887768094429e-06	7.60004918206708e-05
ppt-1	0.562016044925695	5.46382635348568e-06	7.61523336969833e-05
clec-185	-1.24543887689663	5.53046951393249e-06	7.7023908995675e-05
M162.9	-0.361534360435901	5.6051858328657e-06	7.80065431498889e-05
mtm-5	0.418946486910096	5.63414509004718e-06	7.83513975207897e-05
F08H9.2	2.17982698153615	5.66202036892234e-06	7.86806774172114e-05
ctf-8	-0.286243003914213	5.69127216842743e-06	7.90285837550671e-05
F25E2.3	0.538549504695573	5.75075396872516e-06	7.97141088763387e-05
R05D8.9	-1.64365392734155	5.75165609193326e-06	7.97141088763387e-05
F35C8.8	-0.64608534498337	5.7533974879807e-06	7.97141088763387e-05
C36B7.6	0.182352309398131	5.83284652909768e-06	8.07552001731647e-05
emre-1	0.444698688523574	5.87433309124133e-06	8.12695558143247e-05
K08E7.6	-1.03865398042226	5.92793913604881e-06	8.19506984103031e-05
cht-1	0.68789110262935	5.94767130020231e-06	8.21628932893092e-05
Y66H1A.4	-0.494765224609822	6.02278252355902e-06	8.31175224088166e-05
mans-2	-0.594597474633282	6.02564349480325e-06	8.31175224088166e-05
hsp-90	-0.349667597259787	6.05033324480242e-06	8.3371477333116e-05
T22C1.9	2.61425190451198	6.05294893045828e-06	8.3371477333116e-05
K11E4.2	-0.655068576558107	6.08824789939649e-06	8.372863580816e-05
cfim-1	-0.303003693584313	6.08839948482183e-06	8.372863580816e-05
crtc-1	0.583382481017894	6.0922788457447e-06	8.372863580816e-05
Y62E10A.23	-0.229463760448107	6.11138920654255e-06	8.38968346653212e-05
argn-1	-0.466161798233455	6.11346826804805e-06	8.38968346653212e-05
dys-1	0.324807360780934	6.18735013547682e-06	8.48486215359536e-05
rpl-22	-0.379798371798334	6.20944982640042e-06	8.50894345363321e-05
eif-3.L	-0.32745140172506	6.2202171766338e-06	8.51747196443953e-05
daf-3	0.3466823531049	6.29900109228176e-06	8.6164488400181e-05
C56G7.3	0.265453519424416	6.30169175272848e-06	8.6164488400181e-05
fbxa-76	0.441072030261737	6.38606606969196e-06	8.7254514972628e-05
rack-1	-0.52341003285093	6.39606874587996e-06	8.73275343847529e-05
pitp-1	-0.354277781558896	6.40453302191784e-06	8.73794585362968e-05
pmk-1	0.29849997129864	6.42161156675491e-06	8.75487494039182e-05
K02E7.10	-0.990396168017266	6.43097163394403e-06	8.75678936678382e-05
ndk-1	-0.387847422874443	6.43235834741348e-06	8.75678936678382e-05
T02G5.3	0.529463891260242	6.46900063678579e-06	8.80028199834444e-05
arrd-23	-0.987651841055126	6.47542344046557e-06	8.80263145866334e-05
F28H6.6	0.447052231679827	6.52927644575453e-06	8.8694069747909e-05
W03G11.2	-0.769411559445242	6.71993594451783e-06	9.1217899504657e-05
phat-5	-2.78428575354029	6.7294476680471e-06	9.12809160529746e-05
dolk-1	0.259496877824531	6.76827832536556e-06	9.17412476408553e-05
cah-3	-0.522683842518147	6.7822216735362e-06	9.18638204422757e-05
sdc-3	0.643841721518862	6.85414184431819e-06	9.27709335838187e-05
cmd-1	-0.207602716892646	6.85930562522951e-06	9.27738407291143e-05
F28H6.4	0.302051302028146	6.96486105939094e-06	9.41261057979125e-05
W09H1.4	-0.637307979208252	6.96932864864518e-06	9.41261057979125e-05
K03H1.5	0.530973113474249	7.07325152915107e-06	9.54608878081109e-05
cpr-6	-0.294095616411712	7.08151427030056e-06	9.54860190044092e-05
ZK1053.4	0.573368896554722	7.08530099408584e-06	9.54860190044092e-05
Y18D10A.11	-0.385431860851447	7.12297646071346e-06	9.59247965032576e-05
nap-1	-0.32544263902121	7.20509262861088e-06	9.6960995273467e-05
anr-17	-1.53294325692848	7.21413299243747e-06	9.70130108150881e-05
Y14H12B.2	-0.255591944215469	7.24137796478039e-06	9.73095851811994e-05
C31B8.7	-0.771076034884326	7.28479779020498e-06	9.78229365151738e-05
gst-27	-0.474785848063657	7.36957956013902e-06	9.88905786931755e-05
clec-204	-0.666509478669996	7.38094711121144e-06	9.89722707773746e-05
F58A6.9	2.70125829030505	7.41238295768992e-06	9.93227526267728e-05
chil-13	0.653660917757903	7.45111595411454e-06	9.97704426255937e-05
bath-47	-1.05975186426389	7.50561749140148e-06	0.000100428483578738
npp-26	0.923134022221301	7.52578152819618e-06	0.000100626462573157
col-2	-1.43314676004453	7.54814386550128e-06	0.000100853531648387
ifa-1	-0.69958342740139	7.56619194286922e-06	0.000101022673903865
C25E10.5	0.589578992002313	7.58715384502723e-06	0.000101198757210232
tbh-1	-0.300082749236657	7.59017671170309e-06	0.000101198757210232
emr-1	-0.251416986598188	7.63492546667808e-06	0.000101723036814746
D1005.10	-1.35957377660906	7.66749694863277e-06	0.000102084444459567
fnta-1	-0.317219782701568	7.67932274470775e-06	0.000102169328724125
ntl-2	-0.275393937491653	7.72149782200622e-06	0.0001026078591702
C49F5.6	0.267326617218978	7.72323105137908e-06	0.0001026078591702
math-20	-0.693966995959957	7.76488378398261e-06	0.000103088180888483
K04A8.20	2.29986561258091	7.78542948428966e-06	0.000103287799796528
unc-64	0.36961669511621	7.81693174955926e-06	0.000103632392204553
fipr-8	-2.61130983335601	7.84920846484279e-06	0.000103986757513741
gst-16	0.405761158279694	7.88242190132958e-06	0.000104353023278478
R03H10.1	0.495613524755003	7.91325505110749e-06	0.000104687282419239
F41H10.1	1.65971728963291	7.95765617116222e-06	0.000105200439058256
T10H9.8	0.795854808112801	8.01627184841732e-06	0.000105900656850198
frpr-13	0.542065674144236	8.10049535482202e-06	0.000106937947832038
sec-3	0.236367428621341	8.21666500894493e-06	0.000108326208869356
flh-3	0.580029217520583	8.21721268602502e-06	0.000108326208869356
smp-2	-0.417335399058164	8.23232613764041e-06	0.00010844918185257
F45E10.2	-0.497779815405107	8.29154634509312e-06	0.000109152617826626
fipp-1	-0.273029431055519	8.31608144531066e-06	0.00010939878089389
hsp-6	-0.280326971063413	8.39241828997555e-06	0.0001103255773239
Y53F4B.8	1.14387281475589	8.4516154726988e-06	0.000110949075280863
C18B12.4	0.346707767264833	8.45689856075873e-06	0.000110949075280863
C06G3.6	0.421735199715619	8.45760314607667e-06	0.000110949075280863
asna-2	0.3384810912384	8.47034636427334e-06	0.000111038540520747
marg-1	-0.941152049493606	8.48491211474166e-06	0.000111151755767259
F28H1.1	0.432692705647018	8.65772640048491e-06	0.000113336409988471
tth-1	0.472607961667674	8.67213973230397e-06	0.000113445869798863
nep-12	-0.574573023426008	8.69965550125184e-06	0.000113726458874803
atgp-2	-0.428805889978492	8.72727979564908e-06	0.000114008074598772
lst-2	0.222683339491069	8.80744744194762e-06	0.000114975215701079
prdx-6	-0.309320701287019	8.84306547546357e-06	0.000115357501012847
prhg-1	-0.826575588901796	8.84903907268075e-06	0.000115357501012847
K05F6.10	-2.99928632178467	8.91234841798187e-06	0.00011610207327553
rde-11	-0.219758761209972	9.00580669136836e-06	0.000117238091830827
gdh-1	-0.333775111430526	9.16380246310919e-06	0.000119212103381988
mec-7	-0.623989594183484	9.19239715019938e-06	0.000119501162952592
T07A5.7	0.791646493310856	9.20196593097737e-06	0.000119542656508733
col-129	1.93196110643907	9.29219268505676e-06	0.000120631193957115
Y92H12BL.5	0.339041684707853	9.36036577251758e-06	0.000121432122333297
tnc-2	-0.812188733788324	9.39358803538976e-06	0.000121778839081201
F23F12.12	0.962426250233815	9.40164891852505e-06	0.000121788982099878
fbxb-25	0.943384324166147	9.40736402862604e-06	0.000121788982099878
mlc-2	-0.603765202768739	9.44342196116375e-06	0.000122171420347809
ptr-13	0.473911178875418	9.55885908810168e-06	0.000123530243673338
W09D6.4	2.42092670841811	9.56163360556992e-06	0.000123530243673338
ogt-1	0.444214997764074	9.58250054747327e-06	0.000123714569740313
C18H7.7	3.93528539567218	9.59994014534913e-06	0.000123854423926163
C54G4.7	0.228978297819827	9.61724158873456e-06	0.000123959369137505
jnk-1	-0.629531992356785	9.62129958898274e-06	0.000123959369137505
hrdl-1	0.193672466693394	9.64329393527279e-06	0.000124157409416637
ZK354.2	1.63693370105626	9.75707888860081e-06	0.000125536170793213
ace-4	-1.47512789988445	9.80798735800923e-06	0.000126075452699888
ugt-32	1.23119308439821	9.81244454759078e-06	0.000126075452699888
W02B12.1	-0.359633630657641	9.82552099708e-06	0.000126156997678946
bar-1	-0.481479596611825	9.88518356110606e-06	0.000126836174562967
slcr-46.1	-0.376206751652392	9.90864283740051e-06	0.000127050217941115
pho-1	0.44120315836323	1.00164010704482e-05	0.000128344124720863
W04B5.1	0.737295771278719	1.00707737017866e-05	0.000128952680200609
ttr-51	0.371162141405677	1.00814187600317e-05	0.000129000871041334
atf-4	0.429226261095099	1.01097999718636e-05	0.00012920227957384
ppw-1	-0.304363077990637	1.01154000416302e-05	0.00012920227957384
rog-1	-0.283121647786166	1.01178356136987e-05	0.00012920227957384
tag-229	0.212015637924817	1.01468495628966e-05	0.000129406185399195
fut-6	-0.439621855082836	1.01476097587121e-05	0.000129406185399195
aak-2	0.23418939113193	1.01785871066223e-05	0.000129712980218043
cct-8	-0.321166700256406	1.02045574849784e-05	0.000129955594166715
ethe-1	0.458794350417029	1.0212188744008e-05	0.000129964487573098
fshr-1	0.473466222176258	1.02687961429888e-05	0.000130596236429083
gmeb-1	0.350307038767513	1.03493627616859e-05	0.000131531630054619
set-30	0.579881100947241	1.04243898383832e-05	0.00013239540102326
T10B11.5	0.471936823587166	1.0508497620536e-05	0.000133373254160168
erp-44.1	-0.167419648342566	1.05290375695851e-05	0.000133543530635617
T25C12.12	-0.714018434104008	1.05712655300135e-05	0.000133988467630583
glit-1	0.443856363560466	1.06338561813509e-05	0.000134690721605138
F10D11.6	-0.933041120008073	1.0656439622004e-05	0.000134885629408567
Y48A6B.7	0.371060106335169	1.06854586732106e-05	0.000135144187349612
F26H9.5	0.295595810907403	1.06926925867661e-05	0.000135144187349612
F15G9.6	-1.56932839835599	1.06984942935465e-05	0.000135144187349612
ptr-12	-0.522466363811069	1.08271210193664e-05	0.000136649177158703
coh-3	-0.295012934206088	1.08392594215882e-05	0.000136649177158703
T22B7.3	1.00229025188916	1.08395031705426e-05	0.000136649177158703
F27C1.1	2.25862831762158	1.09123658145302e-05	0.000137475275241387
T25B9.11	-0.821224669307232	1.09841628763873e-05	0.000138286848408836
F45E4.5	-0.550807022569342	1.10109614077831e-05	0.000138531196342485
K11G12.6	0.214638025813516	1.10654861314247e-05	0.000139123811549086
Y57A10A.5	0.430641429911983	1.12356988094974e-05	0.000141169175524691
F13A7.11	1.6394935025342	1.13065108042039e-05	0.000141963731772006
WBGene00006756	-0.753844397349864	1.14170050176265e-05	0.000143255137925319
nhr-58	0.826202604746612	1.14653692134233e-05	0.000143765760050056
pnp-1	0.472164216361997	1.15875782131126e-05	0.000145201030202546
Y87G2A.19	-0.936651722240831	1.1623364025192e-05	0.000145552158995491
M05D6.10	2.66186580469559	1.17462096569418e-05	0.00014699228720229
ptl-1	-0.559429219864252	1.18423456530083e-05	0.000148096472055566
W07E11.1	0.299440333584049	1.18556062027439e-05	0.000148163462584425
T09A12.8	2.09623053337705	1.18763461882356e-05	0.000148323774580056
dcar-1	0.458090195790047	1.19691539249575e-05	0.000149383328546773
mapk-15	-0.511476555516413	1.20968049659021e-05	0.000150876051823553
K10B3.5	0.27969552085506	1.21284121244532e-05	0.000151169689950133
ins-19	-1.7711355470452	1.21882567603287e-05	0.000151814658624001
uggt-1	0.33517856767781	1.22130255309133e-05	0.000151983260619029
ipmk-1	0.438304426803102	1.22180077751454e-05	0.000151983260619029
F39G3.5	-0.625011768173322	1.23357750560151e-05	0.000153346445092878
rfc-3	-0.270819991872996	1.24151763301011e-05	0.000154231209730997
nhr-211	0.598108440837683	1.24242411549365e-05	0.000154241605755258
zmp-3	0.731613692446877	1.25212752328345e-05	0.000155343365661625
tlp-1	0.426522615512929	1.25306819425812e-05	0.000155357251121447
C18H7.1	-2.16787231524265	1.25444194969069e-05	0.000155424777190361
T07A9.14	-0.41827654033178	1.25840053907841e-05	0.000155812262256036
T16G1.5	1.52338806915032	1.26049326750459e-05	0.000155968361667598
Y4C6A.3	0.436323666806176	1.26486447326833e-05	0.000156330762989374
spp-22	0.536047241842472	1.26508997895487e-05	0.000156330762989374
Y102A5C.6	-0.554434958866047	1.26734630040553e-05	0.000156506414673268
igcm-4	0.503060548149914	1.26989206854284e-05	0.000156717555739988
C34D4.3	2.45460766774163	1.27302756170971e-05	0.000157001149156646
F34D6.1	0.590617911589211	1.2756044356275e-05	0.000157215521040586
aagr-1	0.370954602086464	1.27895148371914e-05	0.000157524471181334
ZC21.10	-0.789500485198316	1.28341115162617e-05	0.000157969963548156
cdf-2	0.571593153663298	1.2872717111917e-05	0.000158341177808397
K02B12.7	-0.22041888997223	1.28956945089639e-05	0.000158519796239368
K10D3.6	-0.565193860606375	1.30708949866297e-05	0.00016056815034034
cyn-7	-0.216517261430404	1.31061121341275e-05	0.000160833176297013
lips-14	-1.09996958821165	1.31096283677497e-05	0.000160833176297013
chil-10	0.230935373290651	1.31481058296858e-05	0.000161199733082596
H29C22.1	0.363207362700881	1.31626931645948e-05	0.000161273102002284
B0464.9	-0.260069288446579	1.35542715831957e-05	0.000165962361266223
rpoa-49	-0.254905277331992	1.35733774252245e-05	0.00016598403916244
F10G8.8	0.674482829966577	1.35737507754199e-05	0.00016598403916244
rps-30	-0.386129202768052	1.36092802150403e-05	0.00016631001754312
nhr-40	0.291425576920487	1.36729658581764e-05	0.000166979425392427
C33F10.4	-0.199275820915154	1.37822051934037e-05	0.000168203918330434
K08E4.2	0.355851332842982	1.38315962228559e-05	0.000168696878850785
C04F12.1	0.273808369393812	1.39089600743869e-05	0.000169530146654393
tbc-14	0.210860945230576	1.40904643623782e-05	0.000171538370500843
C16H3.3	0.508514729615747	1.40921923914825e-05	0.000171538370500843
T25B9.1	-0.605983452605673	1.41011751275898e-05	0.000171538370500843
F16B4.2	0.641295675434931	1.41348139955181e-05	0.000171836072088186
ZK430.7	-0.283242443404809	1.42119151327233e-05	0.000172601454896569
K02C4.5	0.452362545366208	1.42161872591647e-05	0.000172601454896569
ced-8	0.333724313255979	1.42626403766236e-05	0.000173053369903033
Y39B6A.9	0.977294350932918	1.43052105166394e-05	0.000173457617299432
Y105C5B.9	0.442150774448549	1.43545939944301e-05	0.000173943903697211
acs-21	0.412993608404385	1.44640724074274e-05	0.000175157300613458
ttr-25	0.47864769039071	1.44946395043723e-05	0.000175414145996748
math-45	-0.953841431732616	1.47805845617293e-05	0.000178718996586542
btb-6	0.370037373701301	1.47867899128201e-05	0.000178718996586542
fbl-1	-0.38038537774409	1.48267015946587e-05	0.00017908592016332
F42H10.3	-0.34480122629014	1.50166628592608e-05	0.000181263594307601
taf-4	-0.198807874815057	1.51795351247017e-05	0.000183111689477257
nhr-56	0.654598658255902	1.53000439979482e-05	0.000184446704042146
F35G2.1	0.237985610798245	1.55589285501671e-05	0.000187447091646165
hacd-1	0.501494418291182	1.55825667660762e-05	0.000187611301603638
F28C1.3	0.304116749490812	1.5610324112212e-05	0.000187824862520876
C12D8.15	-3.461668895663	1.57103905919325e-05	0.000188907621575604
cox-19	-0.243623653993471	1.57284196426719e-05	0.00018900317603944
rps-12	-0.401623328400293	1.58164607160745e-05	0.000189939380258509
ccm-3	-0.223794606409092	1.60312169498021e-05	0.000192395129923809
daao-1	0.831370181816548	1.61537221447797e-05	0.00019374131498787
H20E11.1	-0.541523863201382	1.61661012256387e-05	0.000193765814306792
B0432.1	0.708258309309012	1.64226247382155e-05	0.000196714711401015
F46H5.4	0.407465869406812	1.64986459973539e-05	0.000197446183573378
txt-6	-0.379672852129241	1.65047567299415e-05	0.000197446183573378
abce-1	-0.333931698564952	1.6625781752982e-05	0.000198767158636097
T05C12.11	-1.3083121389256	1.66596606606915e-05	0.000199045250953042
flp-6	0.44552109985164	1.67090185100874e-05	0.000199507809547834
K10H10.10	-2.5311541218674	1.68607921445585e-05	0.000201191858397132
gpd-4	-0.373575733585018	1.70215256392467e-05	0.00020293309683896
F10D7.3	0.760382245961047	1.70283666556963e-05	0.00020293309683896
ldb-1	0.330692331570668	1.7040733909224e-05	0.000202951459887112
C06B8.7	0.477185340930608	1.71374460709557e-05	0.000203973691457864
pyc-1	0.270939941998797	1.71574010021761e-05	0.000204081623849488
F19C6.5	0.535295453145964	1.7241004449328e-05	0.000204946017379266
C48D1.5	0.480377011788631	1.72708243441397e-05	0.000205170388564793
F49F1.7	0.742088069489519	1.74686991193079e-05	0.000207389635016179
wago-2	-0.46581137575569	1.75071761985528e-05	0.000207714889251943
F57B7.2	-0.524450021751524	1.76055003237535e-05	0.000208749341599673
W08E12.7	-0.35787936406663	1.76813967865646e-05	0.000209516728293894
R09H10.2	-0.769186735547466	1.77154020686912e-05	0.000209787067074975
chaf-2	-0.228739733668313	1.7761535058176e-05	0.000210200591035711
Y55F3AM.5	-0.262686443451548	1.78376169437643e-05	0.000210967802667386
F15A4.2	0.435678220383448	1.79696810606747e-05	0.000212395738438467
C30G12.2	0.770681731675367	1.80702331684367e-05	0.000213449647747646
rpn-1	-0.290339064877875	1.81498584156797e-05	0.000214255192607262
spp-18	-0.540352949714402	1.82876002691455e-05	0.000215745345906483
C24H10.2	0.258617836748416	1.84200788331264e-05	0.000217171570947036
glt-4	0.415174861826709	1.85088423994015e-05	0.000218014175276749
rpl-9	-0.455580930778948	1.85256664958182e-05	0.000218014175276749
icl-1	0.737359139817654	1.85282368070749e-05	0.000218014175276749
mfsd-8	-0.621011706351692	1.8538066541723e-05	0.000218014175276749
ctsa-3.1	-0.437930243597163	1.85528853244882e-05	0.000218051654102104
W08F4.3	-0.263951664517998	1.86641252136399e-05	0.000219221611061964
C05C12.5	2.26232833717453	1.87740291809449e-05	0.000220374421431429
ekl-4	-0.184743681628195	1.88007440395251e-05	0.000220549904734003
zipt-2.3	-0.917460689484683	1.88528599191518e-05	0.000221022959377373
rmd-6	2.7567861459838	1.89260371739086e-05	0.000221742183038806
tsen-54	-0.392595423380481	1.90665262661084e-05	0.000223225609562371
chk-2	-0.492224280090634	1.90764657270308e-05	0.000223225609562371
cox-6A	-0.325058060013518	1.91224545148711e-05	0.000223624162405348
degt-1	-0.970138578238819	1.92535780032663e-05	0.000225017190305006
pdi-6	0.251585930206822	1.93298305246359e-05	0.000225767603124502
erm-1	-0.259769994560682	1.94737086861098e-05	0.000227306440242724
C07E3.9	0.347336265841936	1.9543712616046e-05	0.000227981603422774
pkg-2	-0.315808395029492	1.95867367031968e-05	0.000228341396914258
nhr-122	0.326325096514459	1.96125310689758e-05	0.000228500004610952
F57C12.2	0.811511402558075	1.96255597481907e-05	0.000228509778285456
Y38E10A.22	-0.178298089924848	1.96499152315993e-05	0.000228642516114146
K04C1.5	0.291339186130638	1.96613536741707e-05	0.000228642516114146
sma-2	-0.406770748287412	1.97084057506802e-05	0.000228950953374316
T14G8.3	0.596514079687206	1.97123033578441e-05	0.000228950953374316
nhr-103	0.485069736499377	1.97399374973906e-05	0.000229129949427916
cst-1	0.334690984660167	1.99358978964031e-05	0.000231261350226468
mrps-14	-0.282819407110846	1.99741135070818e-05	0.000231561367844005
Y54F10BM.9	0.246313848228355	2.00167147470806e-05	0.000231911826111727
C03E10.3	-0.642051561435826	2.01097940944586e-05	0.000232846324950414
C49C3.4	-0.389279700433285	2.01262608111887e-05	0.000232893138991694
slo-1	-0.689299529664917	2.01416328873715e-05	0.000232927236339708
F53H4.2	0.436110223500259	2.0213344279286e-05	0.00023361242408107
Y49F6C.8	0.284689273339744	2.04293833536785e-05	0.000235871357543823
mrps-18.C	-0.232910576185304	2.04445190727313e-05	0.000235871357543823
vhp-1	0.495511106459613	2.04465462503314e-05	0.000235871357543823
C31C9.7	-0.789571709854742	2.04829990377817e-05	0.000236146555942347
Y80D4G.1	-0.5130980692612	2.06777700811237e-05	0.000238245530387673
R10E8.6	-0.650179534292144	2.0848453433033e-05	0.000239953497984336
WBGene00044083	-0.410856082562248	2.0851608247972e-05	0.000239953497984336
R10H10.3	0.370803291822334	2.09026240852225e-05	0.000240339364510563
Y37H9A.5	-0.597056684758549	2.09114359232057e-05	0.000240339364510563
hnd-1	0.643967020060009	2.0923601988757e-05	0.000240339364510563
R09F10.1	-0.380377442580476	2.09394952411467e-05	0.000240374634286917
rimb-1	-0.622052198629928	2.10429058721191e-05	0.000241413900537788
F46C3.2	-0.652003223422783	2.1106864589418e-05	0.000241999561830722
F53B2.5	2.35324145837513	2.11834160159765e-05	0.000242728799899447
viln-1	0.326539670534001	2.13335163125956e-05	0.000244299387169161
maph-1.1	-0.362361662488728	2.14515073977441e-05	0.000245500584663072
hsp-16.49	1.94614937997134	2.14685898805563e-05	0.000245546178096954
ref-1	0.346904414431849	2.16665083106195e-05	0.000247658759018825
T16G1.9	0.258330985222965	2.17419648054084e-05	0.000248369818550997
Y97E10AR.1	-1.07352822049769	2.18194695488067e-05	0.000249103395957327
F41C3.1	1.93759522819116	2.18735117193257e-05	0.000249452247377603
fbxc-34	1.12443002305429	2.18766400666158e-05	0.000249452247377603
asp-5	-0.433155032188486	2.19301820484717e-05	0.000249851853254362
F44G3.10	-2.3570155105585	2.19383415372176e-05	0.000249851853254362
B0403.3	0.551131680117087	2.19678240135609e-05	0.000250035718857446
cpg-3	-0.302517574235035	2.1982608998224e-05	0.000250052177354798
rps-20	-0.337982254985548	2.19976718928388e-05	0.000250071775199003
F53A9.7	0.733858394813341	2.20338491867227e-05	0.000250331234457153
lin-59	0.196096486148033	2.20600906164433e-05	0.000250477564322136
C06G1.1	-0.901171731577527	2.21332126032117e-05	0.000251155692166953
mec-18	-0.846100776496455	2.22691053311181e-05	0.000252417744017567
F40F8.5	0.357489998693643	2.22713618161237e-05	0.000252417744017567
epg-9	0.498472284194506	2.23130925781859e-05	0.000252737905420346
nhr-137	0.448710227058545	2.23722891137812e-05	0.0002531671139436
dat-1	-0.814057065112594	2.23779957219964e-05	0.0002531671139436
C34D10.1	0.327910540609207	2.23939086942204e-05	0.000253194337986644
hst-6	0.273243576638804	2.24938846788287e-05	0.000254171405780183
mvk-1	-0.196519780123322	2.2520262837409e-05	0.00025431617298197
ZK930.2	0.30023766492117	2.26605461356043e-05	0.000255746296121636
pqn-67	-0.692010300377771	2.27726781354556e-05	0.00025685717468547
oac-5	-1.45732241456564	2.29932035884467e-05	0.000259188571538799
F17A2.13	0.336665405692865	2.31963179571497e-05	0.000261321019486014
ntl-11	-0.204399189796689	2.32267059023089e-05	0.00026150620351032
F41G4.5	0.904056731835188	2.32944042117641e-05	0.00026211098520632
tkt-1	-0.323971617058637	2.34930431852127e-05	0.000264187515026993
unc-73	0.193168355016367	2.36428519458658e-05	0.000265712771329257
mes-1	0.303386524567836	2.37029472063843e-05	0.000266228549029886
F42G2.5	0.655619712307957	2.39252631914994e-05	0.000268564660950807
vab-2	0.504578483831808	2.39928880473144e-05	0.000269162584880285
trm-2A	-0.268836602630536	2.4031904972718e-05	0.000269439049413022
vit-4	-0.395549370873439	2.41688968256101e-05	0.000270812994556418
ZK1307.9	0.278056643470499	2.42061136138499e-05	0.000271067984351989
C14B4.2	-0.525047499724659	2.42786000722079e-05	0.000271717395196185
mrpl-20	-0.281785768493175	2.43256593274605e-05	0.000271996063733499
B0244.5	-1.12324001061015	2.43349765580072e-05	0.000271996063733499
wars-1	-0.301488036837659	2.43470284297883e-05	0.000271996063733499
far-6	0.5425671746673	2.45908284800817e-05	0.000274556087366058
sri-39	3.15607348660537	2.4637433088699e-05	0.000274912690881399
slc-25A32	0.266542097195281	2.47904819821832e-05	0.000276455904365263
F07H5.5	0.297805047151308	2.48457442320651e-05	0.000276907444336679
let-413	0.355006374309062	2.49724314261824e-05	0.000277969630674636
C49F8.1	0.607776167505163	2.49850249338662e-05	0.000277969630674636
cyp-33D3	-1.28962965139846	2.49933628741628e-05	0.000277969630674636
madf-1	-0.35738935769555	2.50003626009515e-05	0.000277969630674636
gipc-2	2.20017611147797	2.50574312174368e-05	0.000278439007470106
enpl-1	0.190075634539721	2.51221875788679e-05	0.000278955315880125
Y55F3C.9	0.480031384045785	2.51336567012446e-05	0.000278955315880125
ser-2	-0.875537754569694	2.51645097490652e-05	0.000279132485062708
ZK228.3	0.384918418775055	2.51961989442425e-05	0.000279318714020561
hsp-3	0.243569161855298	2.52273545973391e-05	0.000279498811632222
F42F12.3	0.259920961194617	2.52553022152366e-05	0.000279643175030611
btb-16	0.71352301323389	2.53077119813466e-05	0.000280058068950604
syd-9	0.744643841347472	2.53482180759976e-05	0.000280340823629883
Y119D3B.21	-0.537578488953207	2.54029573294116e-05	0.000280641607634222
fbxb-67	-0.288397091666324	2.54053562442801e-05	0.000280641607634222
F09G2.2	-0.246571326019879	2.55118198215091e-05	0.00028165169279977
tsp-2	1.54635057509682	2.56313575898775e-05	0.000282804843660885
rme-1	-0.188707743549357	2.5764994817709e-05	0.000284112113442807
C33F10.1	2.14335381057351	2.58089270000637e-05	0.00028442924488136
Y116F11B.10	0.637644316171024	2.58775509309958e-05	0.000285017961076643
F16F9.1	-0.472452312018096	2.59049809543134e-05	0.000285152538443663
oac-57	0.612943123186597	2.60269442269508e-05	0.000286326934553063
sss-1	2.22925721830113	2.61692055668001e-05	0.000287691633531314
sma-5	0.431549855155465	2.61816881897163e-05	0.000287691633531314
ate-1	0.168529692181417	2.63023162830003e-05	0.000288753612629361
F57C2.5	-0.128839381635514	2.63099808964581e-05	0.000288753612629361
mec-9	-0.809664567005498	2.63245451820963e-05	0.000288753612629361
T05C3.6	-0.414617325198756	2.65285981588081e-05	0.000290821696540945
pha-1	0.48257958940703	2.65464892211403e-05	0.000290847742220629
C10A4.10	0.46575964765682	2.67339308830612e-05	0.000292570879078921
Y116A8C.25	0.61203422409982	2.67349789748315e-05	0.000292570879078921
F46H5.2	0.224252244422341	2.6841796360409e-05	0.00029356844490795
T12G3.2	0.240966662724896	2.68648814590556e-05	0.000293649602234086
Y43F8B.14	-1.16888642938226	2.69131434006295e-05	0.000293800456897099
ZK84.1	-0.826219738763312	2.69142460023233e-05	0.000293800456897099
C38H2.3	0.668816196534735	2.69282766584727e-05	0.000293800456897099
ceh-86	0.592777650953127	2.69413733813141e-05	0.000293800456897099
arx-4	-0.20292808744224	2.69817378903327e-05	0.0002940695688908
mrpl-39	-0.339101194117697	2.70261827855014e-05	0.000294382813769326
Y92H12A.2	0.284806286547957	2.71768379410099e-05	0.000295851918723677
WBGene00016571	-0.73003006649018	2.75845220599684e-05	0.000300023524139587
Y44A6C.1	0.63573730190902	2.75920492700655e-05	0.000300023524139587
C18B2.3	-0.695902572432567	2.80628804250825e-05	0.000304966235622375
F55H2.5	-0.220280334175866	2.82089281593384e-05	0.000306375763195225
vps-36	-0.149363859023647	2.83003382279133e-05	0.000307190585072648
F01G4.6	-0.226110826939423	2.83450314150736e-05	0.000307497661404497
Y71H2B.11	-0.293037604602434	2.8480118606385e-05	0.000308784443837648
hrpf-2	0.228135703593894	2.85435276921122e-05	0.000309293046310021
sek-4	-0.424810936553096	2.88826121218007e-05	0.0003127865088592
ard-1	-0.197769765505147	2.90383298491376e-05	0.000314291299856774
F46G10.1	-0.392613493898464	2.9129922415242e-05	0.00031510070721069
C07A4.2	0.911460067033927	2.91529677744118e-05	0.000315168127969506
C02F5.5	2.33150352807007	2.92173236173037e-05	0.000315681814714683
K03A11.1	0.496877633062877	2.93050771733081e-05	0.000316447567218222
nspd-2	2.26918884238641	2.93480242980587e-05	0.000316728879384806
fbxa-216	-0.441917679832306	2.94051648488626e-05	0.000317162957570068
C40C9.3	-1.22274633110134	2.98919290129299e-05	0.000322227775317069
Y82E9BR.14	-0.20454820126668	2.99151167248955e-05	0.000322292401221202
F26E4.4	-0.165917689815376	2.99329607609229e-05	0.000322299415522264
K08H2.7	-0.998572317702567	2.99646428336035e-05	0.000322455335567584
K11D9.3	-0.416979318525504	3.00197873940218e-05	0.00032286341622968
F02E11.4	1.43963616285179	3.00937267388432e-05	0.000323473051288048
fos-1	0.44609552300964	3.01338041858594e-05	0.000323718219637891
rpl-33	-0.353599798766371	3.01568113192565e-05	0.000323779831037104
F26B1.8	2.31356584739525	3.05856353322814e-05	0.000328195947303347
tbp-1	-0.231752015296133	3.0785296562074e-05	0.000330149410384805
F31E8.4	0.292629388253178	3.08384585065295e-05	0.000330530442060264
T22C1.8	2.55065964981141	3.15204349455753e-05	0.000337646899137002
lec-1	-0.280346477734073	3.15482504089855e-05	0.000337751857319727
nhr-10	0.309317783421861	3.16355529547152e-05	0.000338493193886468
kin-10	-0.271249355954675	3.16563178007791e-05	0.000338522152591789
dhs-8	0.85806829150664	3.16801305379377e-05	0.000338583652830205
nsun-1	-0.437495749767413	3.17691968560547e-05	0.000339342087899488
C25G6.3	-1.20156447109401	3.22482130629108e-05	0.000344262529656791
hsp-16.1	2.21869439640807	3.24026968433109e-05	0.000345714829268473
ZK6.6	0.980371698057164	3.26641234981365e-05	0.000348305835663292
inf-1	-0.357923730146737	3.27436601395958e-05	0.000348955459338751
ZK945.7	2.20621851840543	3.28175224872257e-05	0.000349405864284551
Y71F9AL.1	0.222770518490798	3.28232010564971e-05	0.000349405864284551
ugt-45	0.229105818756262	3.29154407283361e-05	0.000349890421588529
ttr-17	-0.399533314969855	3.29259282004789e-05	0.000349890421588529
D2021.4	0.489603412975951	3.2938538238492e-05	0.000349890421588529
Y46G5A.20	0.857097179358178	3.29433796065163e-05	0.000349890421588529
cox-15	-0.278503459364208	3.30154951754461e-05	0.000350457798730981
catp-3	1.23527564875463	3.30729095200738e-05	0.000350868569249182
npp-4	-0.218141446929418	3.31886071840828e-05	0.000351867637778153
T12G3.4	0.292975420540479	3.32068452353207e-05	0.000351867637778153
spr-3	0.294338867148374	3.32233926633591e-05	0.000351867637778153
rps-23	-0.325309881367828	3.32746852091911e-05	0.000352211885336813
R03A10.5	0.415423214289756	3.33731501909232e-05	0.000353054781873051
Y71G12B.32	-1.50345829123821	3.37537076586008e-05	0.000356879302745703
algn-2	0.20767036243435	3.39680964616515e-05	0.000358943594289808
slc-17.1	-0.401456760987966	3.40838929254985e-05	0.000359895507166852
Y37H9A.2	-1.4555947491854	3.40965763751376e-05	0.000359895507166852
flp-10	0.390460879644944	3.41315782108088e-05	0.000359965375915926
cgh-1	-0.346498332877415	3.41416002549086e-05	0.000359965375915926
Y9D1A.2	0.783642025577342	3.44588743431151e-05	0.000363106272308059
W07A12.8	-0.905995995989075	3.4513310120382e-05	0.000363475568267799
nfm-1	0.502954122098274	3.45471450824681e-05	0.000363627614663642
C07D10.5	0.521515281613797	3.47516631141577e-05	0.000365575015004489
R11H6.6	-0.43065864489358	3.48244417174975e-05	0.000366135156722495
T07F12.1	-0.462478579636389	3.53065970257546e-05	0.000370996338478025
T01D3.6	-0.421270594189578	3.58819898540504e-05	0.00037683125031038
mrpl-19	-0.230033612019068	3.5973118375664e-05	0.00037757675087917
C18A11.3	-0.590419264165879	3.61232349552703e-05	0.000378940214029936
nhr-12	0.354083933041077	3.62228450922016e-05	0.000379772625334682
msrp-1	2.41325544969312	3.63212349273244e-05	0.000380591319143445
tag-278	0.729572108914967	3.63839768990001e-05	0.000381035771479696
tomm-22	-0.301048829062824	3.64900736218267e-05	0.000381933512068545
F53E2.2	-0.217517672101934	3.66531592264256e-05	0.000383426407845187
rpl-7	-0.350623154079513	3.6743842314174e-05	0.000384160662588681
jmjd-4	-0.393407999349223	3.70776838627668e-05	0.000387434928479056
nhl-1	0.524965096102718	3.72651507527546e-05	0.000389176889142695
R04D3.3	0.223767756090495	3.73890944245973e-05	0.000390253877552061
cdc-48.2	-0.24208493189391	3.75229866004678e-05	0.000391433448420907
arl-8	-0.170032808496479	3.81349877926335e-05	0.00039759648562887
F26D2.15	1.53587648415413	3.88248869889192e-05	0.000404564386600489
T24C4.4	1.35241090165283	3.88916389287265e-05	0.000405034812976615
fip-6	1.19611494391717	3.89927336892838e-05	0.000405695091928256
alkb-1	-0.25293610838532	3.90041714507587e-05	0.000405695091928256
K10C2.12	-0.877809684198582	3.90199642988715e-05	0.000405695091928256
fbxc-36	0.41345607679283	3.90877592244843e-05	0.000406174686486797
dab-1	-0.188952224179159	3.92505542983032e-05	0.000407640382756782
rpl-14	-0.35004051445814	3.94074510916535e-05	0.000409043232649023
exos-4.1	-0.42901925903321	3.98078476562781e-05	0.000412970621009734
lido-6	-0.388751400216619	3.99147837725778e-05	0.00041385096050926
aat-7	-1.703034233482	4.0044031735254e-05	0.000414961536157586
F43D2.2	-0.225613397340927	4.013089170761e-05	0.000415567044764973
ZK54.3	-1.12843498161217	4.01664915816636e-05	0.000415567044764973
C37A5.3	1.7635929231156	4.01846618555134e-05	0.000415567044764973
F52E1.14	-0.372538111239688	4.01911368910112e-05	0.000415567044764973
enu-3.6	-0.388266669046576	4.03393097958944e-05	0.000416869184913912
efl-3	0.5989142542901	4.03765968221601e-05	0.000417024619299291
mrps-16	-0.242264815506801	4.04029879296217e-05	0.000417067407339586
tsct-1	0.390448616948403	4.04963588046547e-05	0.000417801178949949
F59A6.5	0.554715604600633	4.0616689948818e-05	0.000418812139593258
T20B5.2	-0.995623679204197	4.07349705897771e-05	0.00041980085688618
grd-4	-0.712499533654103	4.0824970035499e-05	0.00042049719136564
pifk-1	0.236276584102592	4.10459874463502e-05	0.000422541505035299
ztf-11	0.472476483360692	4.12090670979732e-05	0.000423987470811529
npr-21	-0.72401168742123	4.13782108299213e-05	0.000425494207469943
K05B2.2	0.287757698170377	4.17173850175528e-05	0.000428746765098161
fbxa-170	0.328185282514156	4.18938298943147e-05	0.000430324238465108
F16B12.4	0.214805626063448	4.19748832351671e-05	0.000430920679696847
msh-4	-0.461593032388174	4.2229187514327e-05	0.000433207319972734
K01G5.5	-0.388793272841596	4.22438376672441e-05	0.000433207319972734
D1022.4	0.260614335522088	4.25787537637057e-05	0.000436403126328281
F42C5.9	0.308049979671483	4.30385647313808e-05	0.000440874827570746
nas-7	-0.531015848982409	4.3099153730267e-05	0.000441254361456901
nhr-134	0.515627165259356	4.31560983145659e-05	0.000441596189413129
Y34D9A.3	-0.202369436405934	4.32452087159685e-05	0.000442266602612955
M199.2	0.306561521365039	4.33145786781414e-05	0.000442734510305583
Y41D4A.4	-0.212174720185287	4.34962148417344e-05	0.000444348797505805
clec-266	0.710694639913359	4.37590045274634e-05	0.000446789923132805
F21C10.7	0.653316661008829	4.38542948371428e-05	0.000447297093288961
ntp-1	0.260247029930798	4.38762315332824e-05	0.000447297093288961
F23H12.3	0.389773043703371	4.38802600319214e-05	0.000447297093288961
gst-13	-0.390340401366434	4.42707819714487e-05	0.000451032651541727
cln-3.1	-0.532234779443369	4.43480958675005e-05	0.000451574907730671
daf-8	0.310528029046005	4.44045785605928e-05	0.000451904576382667
T10C6.7	-0.276072400134551	4.44533773140427e-05	0.000452155730401001
Y54G9A.7	-0.252968804342486	4.45263995246697e-05	0.000452652866317494
R10H1.1	0.338071713619634	4.46031382732462e-05	0.000453187224970338
Y71H2AM.29	-0.390249814075539	4.46395116175176e-05	0.000453311096848313
dop-1	-0.827672879861844	4.46884049811425e-05	0.00045356190567217
Y39B6A.49	-0.377258118371577	4.47239362096815e-05	0.000453676898369421
Y48G8AL.15	-0.276801834064292	4.48272032547533e-05	0.000454478503090105
C16A11.4	-0.348335316154079	4.48803776527383e-05	0.000454771653772018
C16D9.1	-1.41920832485481	4.5201867598658e-05	0.000457781853054805
C33C12.11	-1.63549582826176	4.54277439971488e-05	0.000459820998364229
C13A10.1	-0.434529485287869	4.54898112262959e-05	0.00046020075620515
K08F8.15	-0.937561139231646	4.59354028959216e-05	0.000464457962614318
Y51H4A.8	-0.494234215138314	4.60232993930181e-05	0.000464877157978807
aqp-8	0.54293084606698	4.60364949638579e-05	0.000464877157978807
F37A8.5	0.794815286094772	4.60512579945933e-05	0.000464877157978807
Y18D10A.3	0.311164528756508	4.62123728917857e-05	0.000466252498508834
C36E6.2	0.223292092492428	4.65327681725728e-05	0.000469232529404546
sam-4	-0.231057490885661	4.65946570232795e-05	0.000469459192428643
Y43C5A.3	0.57278256611429	4.66053321833834e-05	0.000469459192428643
acl-5	0.203344141685229	4.72631784145281e-05	0.000475830044338745
ceh-40	0.379516178058016	4.73553124248115e-05	0.000476501710528994
T05G5.1	0.479706578383474	4.74268916549657e-05	0.000476965939358362
map-1	-0.357904856367503	4.74616647987246e-05	0.000477059714915223
inx-18	-1.02040653196344	4.75529733464737e-05	0.000477721349599676
C49A9.10	0.216241554863069	4.79217863245646e-05	0.000480945948197357
Y17G7B.12	-0.25917092625879	4.79252657224294e-05	0.000480945948197357
Y37A1A.2	0.677411814684313	4.80096792856009e-05	0.000481535285119248
Y45F3A.9	-0.237923618100505	4.80869288224101e-05	0.000482052175243262
igdb-2	0.480355896608357	4.84919621624788e-05	0.000485852657775429
gap-1	-0.524045163788185	4.86376209783761e-05	0.000486907167183416
Y37H2B.1	1.47609628315714	4.86491584409761e-05	0.000486907167183416
Y50D4B.1	-0.553315189268161	4.87954927743064e-05	0.000487897199053569
vmo-1	0.774745383760078	4.88001305998849e-05	0.000487897199053569
tsp-4	1.6971152899721	4.8979304285599e-05	0.000489427525659828
R10E9.2	2.01245059050488	4.90762353031322e-05	0.000490041446269322
W03D8.7	-0.525497976745705	4.90930244368818e-05	0.000490041446269322
grd-10	-1.26502188893589	4.91565906133691e-05	0.000490414820456741
T05A1.5	-0.687393930693922	4.92826805642572e-05	0.000491411239285939
K11H3.2	1.09692297272229	4.94969567128101e-05	0.000493285460147974
parg-2	1.72290348721482	4.98053352753855e-05	0.000496095013322198
cdh-4	0.385467330183285	5.01864884773484e-05	0.000499626082313528
C06H2.7	0.318564173506472	5.04325185232069e-05	0.000501808913076453
F14B8.6	-0.408961192749137	5.04993337126836e-05	0.000502207166990964
unc-9	-0.606333214492589	5.07984368435829e-05	0.000504913837258645
F13A7.7	4.39989499867645	5.09394095672444e-05	0.000506046725886361
B0304.4	0.287960586815719	5.11042643656197e-05	0.000507415540147197
tig-2	0.424401343174568	5.13354228968736e-05	0.00050944088810206
fbxa-128	0.841471411498068	5.13859704765686e-05	0.000509672699763891
C06A5.12	0.43786794965996	5.18678006748914e-05	0.000514179688763361
B0353.1	-0.218726877269452	5.21270902300081e-05	0.000516476973283156
F49H12.11	-2.127094431253	5.24100976844037e-05	0.000519006704274608
K02G10.5	-0.72755725213858	5.25106224842343e-05	0.000519727628875108
B0416.5	0.168494400973861	5.27565431645819e-05	0.000521818316028875
F30A10.13	-0.570553060484647	5.27775273226686e-05	0.000521818316028875
[truncated: 28,161 more rows]

## Sheet: 150ppm 1h vs Con 1h
	log2FoldChange	pvalue	padj
[truncated: 30,057 more rows]

[truncated: 2 more sheets: 150ppm 2h vs Con 2h, 150ppm 12h vs Con 12h]
